# Supplementary material for: Transcriptomic Analysis Reveals Insect Hormone Biosynthesis Pathway Involved in Desynchronized Development Phenomenon in Hybridized Sibling Species of Tea Geometrids (Ectropis grisescens and Ectropis obliqua)
Source: PubMed Central journal article supplement (PMC6920886; doi:10.3390/insects10110381), 2019-11-01
Supplement: insects-10-00381-s001.pdf [file insects-10-00381-s001.pdf]

Article

# Transcriptomic Analysis Reveals Insect Hormone Biosynthesis Pathway Involved in Desynchronized Development Phenomenon in Hybridized Sibling Species of Tea Geometrids (*Ectropis grisescens* and *Ectropis obliqua*)

Zhibo Wang <sup>1,†</sup>, Jiahe Bai <sup>1,†</sup>, Yongjian Liu <sup>2</sup>, Hong Li <sup>1</sup>, Shuai Zhan <sup>2</sup> and Qiang Xiao <sup>1,\*</sup>

<sup>1</sup> Key Laboratory of Tea Quality and Safety Control, Tea Research Institute, Ministry of Agriculture, Chinese Academy of Agricultural Sciences, Hangzhou 310008, China; wangzhibo9527@163.com (Z.W.); baijhtricaas@163.com (J.B.); hongli\_tea@163.com (H.L.)

<sup>2</sup> Key Laboratory of Insect Developmental and Evolutionary Biology, Institute of Plant Physiology and Ecology, Shanghai Institutes for Biological Sciences, Chinese Academy of Sciences, Shanghai 200032, China; liuyongjian@sippe.ac.cn (Y.L.); szhan@sibs.ac.cn (S.Z.)

\* Correspondence: xqtea@mail.tricaas.com; Tel.: +86-0571-86650801

† These authors contributed equally to this work.

Received: 19 September 2019; Accepted: 24 October 2019; Published: date

## Supplementary Materials

Table S1. Collecting information of samples in China.

| Populations            | Code | Locality                        | Longitude(°E)/Latitude (°N) | Date (M/Y) |
|------------------------|------|---------------------------------|-----------------------------|------------|
| Wuxi                   | WX   | Wuxi/Jiangsu                    | 120.31/31.49                | 3/2017     |
| Huzhou                 | HZ   | Huzhou/Zhejiang                 | 119.68/30.64                | 10/2017    |
| Yuhang                 | YH   | Yuhang/Zhejiang                 | 120.27/30.42                | 10/2017    |
| Liyang                 | LY   | Liyang/Jiangsu                  | 119.39/31.33                | 2016–2017  |
| Shizizhen              | SZZ  | Shizizhen/Anhui                 | 119.09/30.59                | 2016–2017  |
| Tea Research Institute | TRI  | Tea Research Institute/Zhejiang | 120.08/30.20                | 6/2017     |
| Lin'an                 | LA   | Lin'an/Zhejiang                 | 119.37/30.16                | 5/2017     |
| Fuyang                 | FY   | Fuyang/Zhejiang                 | 119.73/29.97                | 10/2017    |
| Chun'an                | CA   | Chun'an/Zhejiang                | 118.67/29.39                | 10/2017    |
| Yizheng                | YZ   | Yizheng/Jiangsu                 | 119.40/32.39                | 3/2017     |
| Jurong                 | JR   | Jurong/Jiangsu                  | 119.16/31.94                | 8/2017     |
| Nanchang               | NC   | Nanchang/Jiangxi                | 115.95/28.52                | 9/2016     |
| Wuyishan               | WYS  | Wuyishan/Fujian                 | 118.06/27.98                | 6/2012     |
| Yingde                 | YD   | Yingde/Guangdong                | 113.41/24.19                | 9/2015     |
| Changsha               | CS   | Changsha/Hunan                  | 112.93/28.23                | 5/2011     |
| Enshi                  | ES   | Enshi/Hubei                     | 109.48/30.27                | 8/2016     |
| Xinyang                | XY   | Xinyang/Henan                   | 114.08/32.15                | 6/2012     |
| Guilin                 | GL   | Guilin/Guangxi                  | 110.16/25.17                | 10/2017    |
| Tongren                | TR   | Tongren/Guizhou                 | 109.18/27.69                | 6/2017     |

**Table S2.** Identified numbers and Accession number.

| Populations            | Code | Identified Numbers | No. of <i>E. griseescens</i> and <i>E. obliqua</i>  | Accession Number             |
|------------------------|------|--------------------|-----------------------------------------------------|------------------------------|
| Wuxi                   | WX   | 44                 | <i>E. obliqua</i> (44)                              | MH286129, MH286130           |
| Huzhou                 | HZ   | 26                 | <i>E. obliqua</i> (26)                              | MH286151                     |
| Yuhang                 | YH   | 38                 | <i>E. obliqua</i> (38)                              | MH286152                     |
| Liyang                 | LY   | 30                 | <i>E. obliqua</i> (27); <i>E. griseescens</i> (3)   | MH286133, MH286134           |
| Shizizhen              | SZZ  | 184                | <i>E. obliqua</i> (148); <i>E. griseescens</i> (36) | MH271323, MH286127, MH286128 |
| Tea Research Institute | TRI  | 47                 | <i>E. obliqua</i> (42); <i>E. griseescens</i> (5)   | MH286149, MH286150           |
| Lin'an                 | LA   | 26                 | <i>E. obliqua</i> (11); <i>E. griseescens</i> (15)  | MH286147, MH286148           |
| Fuyang                 | FY   | 28                 | <i>E. obliqua</i> (6); <i>E. griseescens</i> (22)   | MH286145, MH286146           |
| Chun'an                | CA   | 32                 | <i>E. griseescens</i> (32)                          | MH286153                     |
| Yizheng                | YZ   | 68                 | <i>E. griseescens</i> (68)                          | MH286131, MH286132           |
| Jurong                 | JR   | 32                 | <i>E. griseescens</i> (32)                          | MH286135, MH286136           |
| Nanchang               | NC   | 19                 | <i>E. griseescens</i> (19)                          | MH286139                     |
| Wuyishan               | WYS  | 25                 | <i>E. griseescens</i> (25)                          | MH286137                     |
| Yingde                 | YD   | 10                 | <i>E. griseescens</i> (10)                          | MH286143                     |
| Changsha               | CS   | 23                 | <i>E. griseescens</i> (23)                          | MH286144                     |
| Enshi                  | ES   | 34                 | <i>E. griseescens</i> (34)                          | MH286140                     |
| Xinyang                | XY   | 21                 | <i>E. griseescens</i> (21)                          | MH286138                     |
| Guilin                 | GL   | 28                 | <i>E. griseescens</i> (28)                          | MH286142                     |
| Tongren                | TR   | 42                 | <i>E. griseescens</i> (42)                          | MH286141                     |

Note: The numbers in ( ) represent the number of *E. griseescens* and *E. obliqua*.

**Table S3.** Gene Ontology terms enriched in C-vs-L group.

| ID         | Description   | GeneRatio | BgRatio   | <i>p</i> Value         | <i>p</i> Adjust        | <i>q</i> Value         | geneID                                                                                                                                                                                                                                                                                                                                                                                                                                                                                                                                                                                                                                                                                                                                   | Count |
|------------|---------------|-----------|-----------|------------------------|------------------------|------------------------|------------------------------------------------------------------------------------------------------------------------------------------------------------------------------------------------------------------------------------------------------------------------------------------------------------------------------------------------------------------------------------------------------------------------------------------------------------------------------------------------------------------------------------------------------------------------------------------------------------------------------------------------------------------------------------------------------------------------------------------|-------|
| GO:0031514 | motile cilium | 49/1853   | 156/22442 | $7.02 \times 10^{-17}$ | $2.11 \times 10^{-13}$ | $1.99 \times 10^{-13}$ | TRINITY_DN6620_c0_g1/TRINITY_DN5141_c0_g1/TRINITY_DN8072_c0_g1/TRINITY_DN13193_c0_g1/TRINITY_DN7072_c0_g1/TRINITY_DN1579_c0_g1/TRINITY_DN3895_c0_g2/TRINITY_DN10548_c0_g1/TRINITY_DN7997_c0_g1/TRINITY_DN8542_c0_g1/TRINITY_DN4420_c0_g1/TRINITY_DN1571_c0_g2/TRINITY_DN4119_c0_g1/TRINITY_DN8480_c0_g1/TRINITY_DN8467_c0_g1/TRINITY_DN6225_c1_g1/TRINITY_DN33652_c0_g1/TRINITY_DN9691_c0_g1/TRINITY_DN13308_c0_g1/TRINITY_DN5409_c0_g1/TRINITY_DN11109_c0_g1/TRINITY_DN12895_c0_g1/TRINITY_DN12881_c0_g1/TRINITY_DN12379_c0_g1/TRINITY_DN8728_c0_g1/TRINITY_DN67550_c0_g1/TRINITY_DN14529_c0_g1/TRINITY_DN19684_c0_g1/TRINITY_DN16772_c0_g1/TRINITY_DN14367_c0_g1/TRINITY_DN6439_c0_g2/TRINITY_DN8012_c1_g1/TRINITY_DN15340_c0_g2/TRINI | 49    |

|            |                                    |         |           |                             |                             |                             |                                                                                                                                                                                                                                                                                                                                                                                                                                                                                                                                                                                                                                                                                                                                                                                                                                                                                                                                             |    |
|------------|------------------------------------|---------|-----------|-----------------------------|-----------------------------|-----------------------------|---------------------------------------------------------------------------------------------------------------------------------------------------------------------------------------------------------------------------------------------------------------------------------------------------------------------------------------------------------------------------------------------------------------------------------------------------------------------------------------------------------------------------------------------------------------------------------------------------------------------------------------------------------------------------------------------------------------------------------------------------------------------------------------------------------------------------------------------------------------------------------------------------------------------------------------------|----|
| GO:0004252 | serine-type endopeptidase activity | 84/1853 | 396/22442 | 5.34 ×<br>10 <sup>-16</sup> | 8.03 ×<br>10 <sup>-13</sup> | 7.56 ×<br>10 <sup>-13</sup> | TY_DN23273_c0_g1/TRINITY<br>_DN16994_c0_g1/TRINITY_D<br>N5804_c0_g1/TRINITY_DN21<br>369_c0_g1/TRINITY_DN8676_<br>c0_g1/TRINITY_DN1105_c0_g<br>1/TRINITY_DN28402_c0_g1/T<br>RINITY_DN5776_c0_g1/TRIN<br>ITY_DN26604_c0_g1/TRINITY<br>_DN15362_c0_g2/TRINITY_D<br>N33652_c1_g1/TRINITY_DN1<br>8814_c0_g1/TRINITY_DN2289<br>4_c0_g1/TRINITY_DN12487_c<br>0_g1/TRINITY_DN10924_c0_g<br>1/TRINITY_DN11321_c0_g1<br>TRINITY_DN3813_c0_g1/TRI<br>NITY_DN1405_c0_g2/TRINIT<br>Y_DN5337_c1_g1/TRINITY_D<br>N9772_c1_g1/TRINITY_DN35<br>89_c0_g1/TRINITY_DN2935_c<br>0_g1/TRINITY_DN5796_c0_g1<br>/TRINITY_DN8858_c0_g1/TRI<br>NITY_DN1551_c0_g1/TRINIT<br>Y_DN9120_c0_g2/TRINITY_D<br>N872_c0_g1/TRINITY_DN647<br>_c0_g1/TRINITY_DN10815_c1<br>_g1/TRINITY_DN6769_c0_g1/<br>TRINITY_DN418_c0_g1/TRIN<br>ITY_DN5930_c0_g1/TRINITY_<br>DN1217_c0_g1/TRINITY_DN8<br>315_c0_g1/TRINITY_DN3542_<br>c0_g1/TRINITY_DN20580_c0_<br>g1/TRINITY_DN3480_c0_g1/T | 84 |
|------------|------------------------------------|---------|-----------|-----------------------------|-----------------------------|-----------------------------|---------------------------------------------------------------------------------------------------------------------------------------------------------------------------------------------------------------------------------------------------------------------------------------------------------------------------------------------------------------------------------------------------------------------------------------------------------------------------------------------------------------------------------------------------------------------------------------------------------------------------------------------------------------------------------------------------------------------------------------------------------------------------------------------------------------------------------------------------------------------------------------------------------------------------------------------|----|

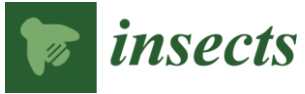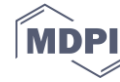

RINITY\_DN418\_c0\_g3/TRINI  
TY\_DN418\_c0\_g2/TRINITY\_D  
N30633\_c0\_g1/TRINITY\_DN4  
75\_c0\_g1/TRINITY\_DN41578\_  
c1\_g1/TRINITY\_DN1255\_c1\_g  
1/TRINITY\_DN20566\_c0\_g1/T  
RINITY\_DN500\_c1\_g2/TRINI  
TY\_DN9607\_c1\_g1/TRINITY\_  
DN1255\_c0\_g1/TRINITY\_DN8  
72\_c0\_g2/TRINITY\_DN2094\_c  
0\_g1/TRINITY\_DN44735\_c0\_g  
1/TRINITY\_DN59849\_c0\_g1/T  
RINITY\_DN3486\_c0\_g1/TRIN  
ITY\_DN14923\_c0\_g1/TRINITY  
\_DN4466\_c0\_g1/TRINITY\_DN  
425\_c0\_g1/TRINITY\_DN20920  
\_c0\_g1/TRINITY\_DN20632\_c0  
\_g1/TRINITY\_DN45024\_c0\_g1  
/TRINITY\_DN2406\_c0\_g1/TRI  
NITY\_DN20632\_c0\_g2/TRINI  
TY\_DN23730\_c0\_g1/TRINITY  
\_DN1367\_c0\_g1/TRINITY\_DN  
21632\_c0\_g2/TRINITY\_DN183  
86\_c1\_g1/TRINITY\_DN461\_c0  
\_g2/TRINITY\_DN7230\_c0\_g1/  
TRINITY\_DN3554\_c0\_g1/TRI  
NITY\_DN7230\_c0\_g2/TRINIT  
Y\_DN25822\_c0\_g1/TRINITY\_  
DN551\_c1\_g1/TRINITY\_DN85  
0\_c0\_g1/TRINITY\_DN18300\_c  
0\_g1/TRINITY\_DN1446\_c0\_g1  
/TRINITY\_DN5369\_c0\_g3/TRI

|            |                 |         |          |                             |                            |                            |                                                                                                                                                                                                                                                                                                                                                                                                                                                                                                                                                                                                                                                                                                                                                                                                            |    |
|------------|-----------------|---------|----------|-----------------------------|----------------------------|----------------------------|------------------------------------------------------------------------------------------------------------------------------------------------------------------------------------------------------------------------------------------------------------------------------------------------------------------------------------------------------------------------------------------------------------------------------------------------------------------------------------------------------------------------------------------------------------------------------------------------------------------------------------------------------------------------------------------------------------------------------------------------------------------------------------------------------------|----|
| GO:0005549 | odorant binding | 24/1853 | 54/22442 | 1.07 ×<br>10 <sup>-12</sup> | 1.07 ×<br>10 <sup>-9</sup> | 1.01 ×<br>10 <sup>-9</sup> | <p>NITY_DN43117_c0_g2/TRINITY_DN2168_c0_g1/TRINITY_DN5331_c0_g1/TRINITY_DN333_c0_g1/TRINITY_DN55174_c0_g1/TRINITY_DN326_c1_g1/TRINITY_DN1709_c0_g2/TRINITY_DN418_c3_g1/TRINITY_DN51634_c0_g2/TRINITY_DN27965_c0_g1/TRINITY_DN34089_c0_g1/TRINITY_DN21874_c0_g1/TRINITY_DN22_c2_g1/TRINITY_DN418_c0_g4/TRINITY_DN14404_c0_g1/TRINITY_DN12345_c0_g1/TRINITY_DN15542_c0_g1/TRINITY_DN7353_c0_g1/TRINITY_DN3523_c0_g1/TRINITY_DN12351_c0_g1/TRINITY_DN1801_c0_g1/TRINITY_DN14404_c1_g1/TRINITY_DN75_c0_g1/TRINITY_DN1405_c0_g3/TRINITY_DN54378_c0_g1/TRINITY_DN75_c0_g2</p> <p>TRINITY_DN2704_c0_g1/TRINITY_DN1792_c0_g1/TRINITY_DN1_c7_g1/TRINITY_DN1532_c0_g1/TRINITY_DN10105_c1_g1/TRINITY_DN8502_c0_g1/TRINITY_DN5279_c0_g1/TRINITY_DN8423_c0_g1/TRINITY_DN2119_c0_g1/TRINITY_DN13558_c0_g1/TRINITY_DN</p> | 24 |
|------------|-----------------|---------|----------|-----------------------------|----------------------------|----------------------------|------------------------------------------------------------------------------------------------------------------------------------------------------------------------------------------------------------------------------------------------------------------------------------------------------------------------------------------------------------------------------------------------------------------------------------------------------------------------------------------------------------------------------------------------------------------------------------------------------------------------------------------------------------------------------------------------------------------------------------------------------------------------------------------------------------|----|

|            |                        |         |          |                        |                       |                       |                                                                                                                                                                                                                                                                                                                                                                                                                                                                                                                                                                                                                                                                                                                                                                                                         |    |
|------------|------------------------|---------|----------|------------------------|-----------------------|-----------------------|---------------------------------------------------------------------------------------------------------------------------------------------------------------------------------------------------------------------------------------------------------------------------------------------------------------------------------------------------------------------------------------------------------------------------------------------------------------------------------------------------------------------------------------------------------------------------------------------------------------------------------------------------------------------------------------------------------------------------------------------------------------------------------------------------------|----|
| GO:0036126 | sperm flagellum        | 19/1853 | 36/22442 | $5.26 \times 10^{-12}$ | $3.95 \times 10^{-9}$ | $3.72 \times 10^{-9}$ | 18645_c0_g1/TRINITY_DN10865_c0_g1/TRINITY_DN58768_c0_g3/TRINITY_DN13068_c0_g1/TRINITY_DN19984_c0_g1/TRINITY_DN7245_c0_g1/TRINITY_DN25958_c0_g1/TRINITY_DN22639_c0_g1/TRINITY_DN28118_c0_g2/TRINITY_DN6318_c0_g1/TRINITY_DN25804_c0_g1/TRINITY_DN17621_c0_g2/TRINITY_DN2473_c0_g2/TRINITY_DN69114_c0_g1/TRINITY_DN2720_c1_g1/TRINITY_DN16194_c0_g1/TRINITY_DN5141_c0_g1/TRINITY_DN3290_c0_g1/TRINITY_DN7072_c0_g1/TRINITY_DN12837_c0_g1/TRINITY_DN4647_c0_g1/TRINITY_DN10099_c0_g1/TRINITY_DN2468_c0_g1/TRINITY_DN8480_c0_g1/TRINITY_DN8467_c0_g1/TRINITY_DN6225_c1_g1/TRINITY_DN6785_c0_g1/TRINITY_DN12881_c0_g1/TRINITY_DN13060_c0_g1/TRINITY_DN6439_c1_g2/TRINITY_DN28846_c0_g1/TRINITY_DN21369_c0_g1/TRINITY_DN10924_c0_g1/TRINITY_DN12837_c0_g1/TRINITY_DN8480_c0_g1/TRINITY_DN19594_c0_g1/TRINITY_ | 19 |
| GO:0007288 | sperm axoneme assembly | 12/1853 | 19/22442 | $2.82 \times 10^{-9}$  | $1.70 \times 10^{-6}$ | $1.60 \times 10^{-6}$ |                                                                                                                                                                                                                                                                                                                                                                                                                                                                                                                                                                                                                                                                                                                                                                                                         | 12 |

|            |                            |         |          |                       |                       |                       |                                                                                                                                                                                                                                                                                                                                                                                                                                                                                                                                                                                                                                                                                                                                                                                   |    |
|------------|----------------------------|---------|----------|-----------------------|-----------------------|-----------------------|-----------------------------------------------------------------------------------------------------------------------------------------------------------------------------------------------------------------------------------------------------------------------------------------------------------------------------------------------------------------------------------------------------------------------------------------------------------------------------------------------------------------------------------------------------------------------------------------------------------------------------------------------------------------------------------------------------------------------------------------------------------------------------------|----|
| GO:0004177 | aminopeptidase activity    | 20/1853 | 54/22442 | $4.06 \times 10^{-9}$ | $2.04 \times 10^{-6}$ | $1.92 \times 10^{-6}$ | DN6225_c1_g1/TRINITY_DN8472_c0_g1/TRINITY_DN4107_c0_g1/TRINITY_DN12881_c0_g1/TRINITY_DN8728_c0_g1/TRINITY_DN19161_c0_g1/TRINITY_DN6439_c1_g2/TRINITY_DN15362_c0_g2/TRINITY_DN10924_c0_g1/TRINITY_DN647_c0_g1/TRINITY_DN1217_c0_g1/TRINITY_DN15191_c0_g1/TRINITY_DN8267_c0_g1/TRINITY_DN18930_c0_g1/TRINITY_DN703_c1_g3/TRINITY_DN703_c1_g1/TRINITY_DN2723_c0_g1/TRINITY_DN5123_c0_g1/TRINITY_DN47563_c0_g1/TRINITY_DN13855_c0_g1/TRINITY_DN3835_c1_g1/TRINITY_DN1346_c0_g1/TRINITY_DN14581_c0_g1/TRINITY_DN1234_c0_g1/TRINITY_DN864_c0_g1/TRINITY_DN21874_c0_g1/TRINITY_DN3861_c0_g1/TRINITY_DN6125_c0_g1/TRINITY_DN1107_c0_g1/TRINITY_DN8072_c0_g1/TRINITY_DN7072_c0_g1/TRINITY_DN12837_c0_g1/TRINITY_DN19594_c0_g1/TRINITY_DN8472_c0_g1/TRINITY_DN6785_c0_g1/TRINITY_DN67550_c0 | 20 |
| GO:0003351 | epithelial cilium movement | 12/1853 | 20/22442 | $6.52 \times 10^{-9}$ | $2.80 \times 10^{-6}$ | $2.64 \times 10^{-6}$ |                                                                                                                                                                                                                                                                                                                                                                                                                                                                                                                                                                                                                                                                                                                                                                                   | 12 |



|            |                  |         |           |                       |                       |                       |                                                                                                                                                                                                                                                                                                                                                                                                                                                                                                                                                                                                                                                                                                                                                                                                  |    |
|------------|------------------|---------|-----------|-----------------------|-----------------------|-----------------------|--------------------------------------------------------------------------------------------------------------------------------------------------------------------------------------------------------------------------------------------------------------------------------------------------------------------------------------------------------------------------------------------------------------------------------------------------------------------------------------------------------------------------------------------------------------------------------------------------------------------------------------------------------------------------------------------------------------------------------------------------------------------------------------------------|----|
| GO:0036156 | inner dynein arm | 10/1853 | 14/22442  | $1.06 \times 10^{-8}$ | $3.97 \times 10^{-6}$ | $3.74 \times 10^{-6}$ | _g1/TRINITY_DN6439_c1_g2/TRINITY_DN2566_c4_g1/TRINITY_DN21369_c0_g1/TRINITY_DN43314_c0_g2/TRINITY_DN15433_c0_g1/TRINITY_DN12837_c0_g1/TRINITY_DN59265_c1_g1/TRINITY_DN12688_c0_g1/TRINITY_DN6439_c1_g2/TRINITY_DN6439_c0_g2/TRINITY_DN17632_c0_g1/TRINITY_DN1105_c0_g1/TRINITY_DN28402_c0_g1/TRINITY_DN6439_c0_g3/TRINITY_DN6439_c1_g1/TRINITY_DN6235_c0_g1/TRINITY_DN16194_c0_g1/TRINITY_DN7072_c0_g1/TRINITY_DN2925_c0_g1/TRINITY_DN12837_c0_g1/TRINITY_DN7997_c0_g1/TRINITY_DN4420_c0_g1/TRINITY_DN16707_c0_g1/TRINITY_DN41571_c0_g2/TRINITY_DN8467_c0_g1/TRINITY_DN9691_c0_g1/TRINITY_DN13308_c0_g1/TRINITY_DN12895_c0_g1/TRINITY_DN12379_c0_g1/TRINITY_DN8728_c0_g1/TRINITY_DN13060_c0_g1/TRINITY_DN14529_c0_g1/TRINITY_DN19684_c0_g1/TRINITY_DN59265_c1_g1/TRINITY_DN6439_c1_g2/TRINITY_DN | 10 |
| GO:0005930 | axoneme          | 35/1853 | 157/22442 | $4.75 \times 10^{-8}$ | $1.59 \times 10^{-5}$ | $1.50 \times 10^{-5}$ |                                                                                                                                                                                                                                                                                                                                                                                                                                                                                                                                                                                                                                                                                                                                                                                                  | 35 |

|            |                           |         |          |                       |                       |                       |                                                                                                                                                                                                                                                                                                                                                                                                                                                                                                                                                                                                                                                                                                                                                                                              |    |
|------------|---------------------------|---------|----------|-----------------------|-----------------------|-----------------------|----------------------------------------------------------------------------------------------------------------------------------------------------------------------------------------------------------------------------------------------------------------------------------------------------------------------------------------------------------------------------------------------------------------------------------------------------------------------------------------------------------------------------------------------------------------------------------------------------------------------------------------------------------------------------------------------------------------------------------------------------------------------------------------------|----|
| GO:0036159 | inner dynein arm assembly | 14/1853 | 32/22442 | $7.39 \times 10^{-8}$ | $2.22 \times 10^{-5}$ | $2.09 \times 10^{-5}$ | 28846_c0_g1/TRINITY_DN12493_c0_g1/TRINITY_DN15340_c0_g2/TRINITY_DN21369_c0_g1/TRINITY_DN32303_c0_g1/TRINITY_DN19322_c0_g1/TRINITY_DN28402_c0_g1/TRINITY_DN5776_c0_g1/TRINITY_DN15362_c0_g2/TRINITY_DN11245_c0_g1/TRINITY_DN12487_c0_g1/TRINITY_DN10924_c0_g1/TRINITY_DN21874_c0_g1/TRINITY_DN3830_c0_g1/TRINITY_DN11321_c0_g1/TRINITY_DN6235_c0_g1/TRINITY_DN3290_c0_g1/TRINITY_DN12837_c0_g1/TRINITY_DN7221_c0_g2/TRINITY_DN59265_c1_g1/TRINITY_DN12688_c0_g1/TRINITY_DN6439_c1_g2/TRINITY_DN17632_c0_g1/TRINITY_DN2566_c4_g1/TRINITY_DN28402_c0_g1/TRINITY_DN6439_c0_g3/TRINITY_DN6439_c1_g1/TRINITY_DN5659_c0_g1/TRINITY_DN3830_c0_g1/TRINITY_DN16707_c0_g1/TRINITY_DN4955_c0_g1/TRINITY_DN13058_c0_g1/TRINITY_DN8676_c0_g1/TRINITY_DN15433_c0_g1/TRINITY_DN15601_c0_g1/TRINITY_DN11245_c | 14 |
| GO:0042073 | intraciliary transport    | 11/1853 | 20/22442 | $9.84 \times 10^{-8}$ | $2.47 \times 10^{-5}$ | $2.33 \times 10^{-5}$ |                                                                                                                                                                                                                                                                                                                                                                                                                                                                                                                                                                                                                                                                                                                                                                                              | 11 |

|            |                                  |         |          |                       |                       |                       |                                                                                                                                                                                                                                                                                                                                                                                                                                                                                                                                                                                                                                                                                                                                                                                            |    |
|------------|----------------------------------|---------|----------|-----------------------|-----------------------|-----------------------|--------------------------------------------------------------------------------------------------------------------------------------------------------------------------------------------------------------------------------------------------------------------------------------------------------------------------------------------------------------------------------------------------------------------------------------------------------------------------------------------------------------------------------------------------------------------------------------------------------------------------------------------------------------------------------------------------------------------------------------------------------------------------------------------|----|
| GO:0008234 | cysteine-type peptidase activity | 19/1853 | 58/22442 | $9.87 \times 10^{-8}$ | $2.47 \times 10^{-5}$ | $2.33 \times 10^{-5}$ | 0_g1/TRINITY_DN12487_c0_g1/TRINITY_DN28353_c0_g1/TRINITY_DN24749_c0_g1/TRINITY_DN10229_c0_g2 TRINITY_DN647_c0_g1/TRINITY_DN1217_c0_g1/TRINITY_DN10957_c0_g1/TRINITY_DN16716_c0_g1/TRINITY_DN703_c1_g3/TRINITY_DN703_c1_g1/TRINITY_DN4321_c0_g1/TRINITY_DN2564_c0_g3/TRINITY_DN13855_c0_g1/TRINITY_DN8634_c0_g2/TRINITY_DN8634_c0_g1/TRINITY_DN430_c0_g1/TRINITY_DN26084_c0_g1/TRINITY_DN2564_c0_g2/TRINITY_DN14581_c0_g1/TRINITY_DN9223_c0_g1/TRINITY_DN1587_c0_g1/TRINITY_DN21874_c0_g1/TRINITY_DN6608_c0_g3 TRINITY_DN6620_c0_g1/TRINITY_DN13077_c0_g1/TRINITY_DN7997_c0_g1/TRINITY_DN4420_c0_g1/TRINITY_DN41571_c0_g2/TRINITY_DN12379_c0_g1/TRINITY_DN14529_c0_g1/TRINITY_DN11326_c0_g1/TRINITY_DN12688_c0_g1/TRINITY_DN17632_c0_g1/TRINITY_DN15340_c0_g2/TRINITY_DN6620_c0_g2/TRINITY_ | 19 |
| GO:0060285 | cilium-dependent cell motility   | 18/1853 | 54/22442 | $1.58 \times 10^{-7}$ | $3.50 \times 10^{-5}$ | $3.30 \times 10^{-5}$ |                                                                                                                                                                                                                                                                                                                                                                                                                                                                                                                                                                                                                                                                                                                                                                                            | 18 |

|            |                                      |         |          |                       |                       |                       |                                                                                                                                                                                                                                                                                                                                                                                                                                                                                                                                                                                                                                                                                                                                                                                        |    |
|------------|--------------------------------------|---------|----------|-----------------------|-----------------------|-----------------------|----------------------------------------------------------------------------------------------------------------------------------------------------------------------------------------------------------------------------------------------------------------------------------------------------------------------------------------------------------------------------------------------------------------------------------------------------------------------------------------------------------------------------------------------------------------------------------------------------------------------------------------------------------------------------------------------------------------------------------------------------------------------------------------|----|
| GO:0030992 | intraciliary transport particle B    | 10/1853 | 17/22442 | $1.63 \times 10^{-7}$ | $3.50 \times 10^{-5}$ | $3.30 \times 10^{-5}$ | DN32303_c0_g1/TRINITY_DN6439_c1_g1/TRINITY_DN15362_c0_g2/TRINITY_DN47966_c0_g1/TRINITY_DN3830_c0_g1/TRINITY_DN15707_c0_g1/TRINITY_DN11712_c0_g1/TRINITY_DN13058_c0_g1/TRINITY_DN8676_c0_g1/TRINITY_DN25714_c0_g1/TRINITY_DN15433_c0_g1/TRINITY_DN15601_c0_g1/TRINITY_DN11245_c0_g1/TRINITY_DN12487_c0_g1/TRINITY_DN10924_c0_g1/TRINITY_DN24749_c0_g1/TRINITY_DN4347_c0_g1/TRINITY_DN647_c0_g1/TRINITY_DN1217_c0_g1/TRINITY_DN10957_c0_g1/TRINITY_DN16716_c0_g1/TRINITY_DN703_c1_g3/TRINITY_DN703_c1_g1/TRINITY_DN4321_c0_g1/TRINITY_DN650_c0_g1/TRINITY_DN13855_c0_g1/TRINITY_DN8634_c0_g2/TRINITY_DN8634_c0_g1/TRINITY_DN8465_c0_g1/TRINITY_DN430_c0_g1/TRINITY_DN14581_c0_g1/TRINITY_DN4935_c0_g1/TRINITY_DN5697_c0_g1/TRINITY_DN3997_c0_g1/TRINITY_DN1587_c0_g1/TRINITY_DN9554_c0_g | 10 |
| GO:0004197 | cysteine-type endopeptidase activity | 22/1853 | 78/22442 | $2.00 \times 10^{-7}$ | $4.01 \times 10^{-5}$ | $3.78 \times 10^{-5}$ | DN32303_c0_g1/TRINITY_DN6439_c1_g1/TRINITY_DN15362_c0_g2/TRINITY_DN47966_c0_g1/TRINITY_DN3830_c0_g1/TRINITY_DN15707_c0_g1/TRINITY_DN11712_c0_g1/TRINITY_DN13058_c0_g1/TRINITY_DN8676_c0_g1/TRINITY_DN25714_c0_g1/TRINITY_DN15433_c0_g1/TRINITY_DN15601_c0_g1/TRINITY_DN11245_c0_g1/TRINITY_DN12487_c0_g1/TRINITY_DN10924_c0_g1/TRINITY_DN24749_c0_g1/TRINITY_DN4347_c0_g1/TRINITY_DN647_c0_g1/TRINITY_DN1217_c0_g1/TRINITY_DN10957_c0_g1/TRINITY_DN16716_c0_g1/TRINITY_DN703_c1_g3/TRINITY_DN703_c1_g1/TRINITY_DN4321_c0_g1/TRINITY_DN650_c0_g1/TRINITY_DN13855_c0_g1/TRINITY_DN8634_c0_g2/TRINITY_DN8634_c0_g1/TRINITY_DN8465_c0_g1/TRINITY_DN430_c0_g1/TRINITY_DN14581_c0_g1/TRINITY_DN4935_c0_g1/TRINITY_DN5697_c0_g1/TRINITY_DN3997_c0_g1/TRINITY_DN1587_c0_g1/TRINITY_DN9554_c0_g | 22 |

|            |                                           |         |           |                       |                       |                       |                                                                                                                                                                                                                                                                                                                                                                                                                                                                                                                                                                                                                                                                                                                                                                                                             |    |
|------------|-------------------------------------------|---------|-----------|-----------------------|-----------------------|-----------------------|-------------------------------------------------------------------------------------------------------------------------------------------------------------------------------------------------------------------------------------------------------------------------------------------------------------------------------------------------------------------------------------------------------------------------------------------------------------------------------------------------------------------------------------------------------------------------------------------------------------------------------------------------------------------------------------------------------------------------------------------------------------------------------------------------------------|----|
| GO:0060294 | cilium movement involved in cell motility | 10/1853 | 18/22442  | $3.39 \times 10^{-7}$ | $6.37 \times 10^{-5}$ | $6.00 \times 10^{-5}$ | 1/TRINITY_DN21874_c0_g1/TRINITY_DN6608_c0_g3<br>TRINITY_DN2720_c1_g1/TRINITY_DN3290_c0_g1/TRINITY_DN7072_c0_g1/TRINITY_DN12837_c0_g1/TRINITY_DN4647_c0_g1/TRINITY_DN2468_c0_g1/TRINITY_DN12895_c0_g1/TRINITY_DN6439_c1_g2/TRINITY_DN21369_c0_g1/TRINITY_DN28402_c0_g1<br>TRINITY_DN1000_c0_g1/TRINITY_DN3123_c0_g1/TRINITY_DN1389_c0_g1/TRINITY_DN3277_c0_g1/TRINITY_DN4192_c0_g1/TRINITY_DN3218_c0_g1/TRINITY_DN6515_c0_g1/TRINITY_DN4040_c0_g2/TRINITY_DN3156_c1_g1/TRINITY_DN1263_c0_g1/TRINITY_DN505_c0_g1/TRINITY_DN23502_c0_g2/TRINITY_DN8020_c0_g1/TRINITY_DN49735_c0_g1/TRINITY_DN7657_c0_g1/TRINITY_DN5899_c0_g1/TRINITY_DN7142_c1_g1/TRINITY_DN6985_c0_g1/TRINITY_DN13464_c0_g2/TRINITY_DN6233_c0_g1/TRINITY_DN41872_c0_g1/TRINITY_DN3161_c0_g3/TRINITY_DN776_c0_g1/TRINITY_DN7253_c0_g2/TRINITY_ | 10 |
| GO:0042302 | structural constituent of cuticle         | 37/1853 | 191/22442 | $8.56 \times 10^{-7}$ | 0.000151              | 0.000143              |                                                                                                                                                                                                                                                                                                                                                                                                                                                                                                                                                                                                                                                                                                                                                                                                             | 37 |

|            |                    |         |           |                       |         |         |                                                                                                                                                                                                                                                                                                                                                                                                                                                                                                                                                                                                                                                                                                                                                                                                                                                                                                                                             |    |
|------------|--------------------|---------|-----------|-----------------------|---------|---------|---------------------------------------------------------------------------------------------------------------------------------------------------------------------------------------------------------------------------------------------------------------------------------------------------------------------------------------------------------------------------------------------------------------------------------------------------------------------------------------------------------------------------------------------------------------------------------------------------------------------------------------------------------------------------------------------------------------------------------------------------------------------------------------------------------------------------------------------------------------------------------------------------------------------------------------------|----|
| GO:0031090 | organelle membrane | 49/1853 | 288/22442 | $9.55 \times 10^{-7}$ | 0.00016 | 0.00015 | DN12320_c1_g1/TRINITY_DN<br>21849_c0_g1/TRINITY_DN807<br>7_c0_g1/TRINITY_DN639_c0_<br>g1/TRINITY_DN22449_c0_g1/<br>TRINITY_DN8498_c0_g1/TRI<br>NITY_DN48108_c0_g1/TRINI<br>TY_DN3150_c0_g1/TRINITY_<br>DN2999_c1_g1/TRINITY_DN1<br>0645_c0_g1/TRINITY_DN5336<br>_c0_g1/TRINITY_DN35289_c0<br>_g1/TRINITY_DN617_c0_g1<br>TRINITY_DN11877_c0_g2/TRI<br>NITY_DN2352_c0_g2/TRINIT<br>Y_DN5701_c0_g1/TRINITY_D<br>N2531_c2_g1/TRINITY_DN53<br>219_c0_g1/TRINITY_DN2754_<br>c0_g1/TRINITY_DN5701_c0_g<br>2/TRINITY_DN16034_c0_g1/T<br>RINITY_DN2955_c0_g2/TRIN<br>ITY_DN8292_c0_g1/TRINITY_<br>DN36608_c0_g1/TRINITY_DN<br>54392_c0_g2/TRINITY_DN461<br>_c0_g1/TRINITY_DN1949_c0_<br>g1/TRINITY_DN5766_c0_g2/T<br>RINITY_DN42315_c0_g1/TRI<br>NITY_DN2871_c0_g2/TRINIT<br>Y_DN482_c0_g1/TRINITY_D<br>N35617_c0_g1/TRINITY_DN1<br>6074_c0_g1/TRINITY_DN6715<br>_c0_g1/TRINITY_DN18271_c1<br>_g2/TRINITY_DN19412_c0_g1<br>/TRINITY_DN13080_c1_g2/TR | 49 |
|------------|--------------------|---------|-----------|-----------------------|---------|---------|---------------------------------------------------------------------------------------------------------------------------------------------------------------------------------------------------------------------------------------------------------------------------------------------------------------------------------------------------------------------------------------------------------------------------------------------------------------------------------------------------------------------------------------------------------------------------------------------------------------------------------------------------------------------------------------------------------------------------------------------------------------------------------------------------------------------------------------------------------------------------------------------------------------------------------------------|----|

|            |               |         |           |                            |          |          |                                                                                                                                                                                                                                                                                                                                                                                                                                                                                                                                                                                                                                                                                                                                                                                                                                                                                                                                      |    |
|------------|---------------|---------|-----------|----------------------------|----------|----------|--------------------------------------------------------------------------------------------------------------------------------------------------------------------------------------------------------------------------------------------------------------------------------------------------------------------------------------------------------------------------------------------------------------------------------------------------------------------------------------------------------------------------------------------------------------------------------------------------------------------------------------------------------------------------------------------------------------------------------------------------------------------------------------------------------------------------------------------------------------------------------------------------------------------------------------|----|
| GO:0006811 | ion transport | 40/1853 | 217/22442 | 1.19 ×<br>10 <sup>-6</sup> | 0.000189 | 0.000178 | INITY_DN1029_c0_g1/TRINIT<br>Y_DN4749_c0_g3/TRINITY_D<br>N30098_c0_g2/TRINITY_DN1<br>8210_c0_g1/TRINITY_DN1599<br>3_c0_g1/TRINITY_DN30772_c<br>0_g1/TRINITY_DN2041_c0_g3<br>/TRINITY_DN65320_c0_g1/TR<br>INITY_DN4798_c0_g1/TRINIT<br>Y_DN21883_c1_g1/TRINITY_<br>DN1316_c6_g1/TRINITY_DN1<br>812_c0_g1/TRINITY_DN1062_<br>c0_g1/TRINITY_DN13796_c0_<br>g3/TRINITY_DN428_c3_g1/TR<br>INITY_DN32222_c0_g1/TRINI<br>TY_DN892_c0_g2/TRINITY_D<br>N13080_c1_g3/TRINITY_DN1<br>812_c0_g3/TRINITY_DN11902<br>_c0_g1/TRINITY_DN8820_c0_<br>g1/TRINITY_DN2352_c0_g1/T<br>RINITY_DN9739_c0_g1/TRIN<br>ITY_DN2801_c0_g1/TRINITY_<br>DN22316_c0_g2<br>TRINITY_DN4901_c3_g1/TRI<br>NITY_DN35198_c0_g1/TRINI<br>TY_DN2080_c0_g1/TRINITY_<br>DN10272_c0_g1/TRINITY_DN<br>8811_c0_g1/TRINITY_DN8542<br>_c0_g1/TRINITY_DN19996_c0<br>_g1/TRINITY_DN10962_c0_g1<br>/TRINITY_DN28824_c0_g1/TR<br>INITY_DN13967_c0_g1/TRINI<br>TY_DN10884_c0_g1/TRINITY | 40 |
|------------|---------------|---------|-----------|----------------------------|----------|----------|--------------------------------------------------------------------------------------------------------------------------------------------------------------------------------------------------------------------------------------------------------------------------------------------------------------------------------------------------------------------------------------------------------------------------------------------------------------------------------------------------------------------------------------------------------------------------------------------------------------------------------------------------------------------------------------------------------------------------------------------------------------------------------------------------------------------------------------------------------------------------------------------------------------------------------------|----|

|            |                                                                                 |         |           |                       |          |         |                                                                                                                                                                                                                                                                                                                                                                                                                                                                                                                                                                                                                                                                                                                                                                                                                                                                                                                                              |    |
|------------|---------------------------------------------------------------------------------|---------|-----------|-----------------------|----------|---------|----------------------------------------------------------------------------------------------------------------------------------------------------------------------------------------------------------------------------------------------------------------------------------------------------------------------------------------------------------------------------------------------------------------------------------------------------------------------------------------------------------------------------------------------------------------------------------------------------------------------------------------------------------------------------------------------------------------------------------------------------------------------------------------------------------------------------------------------------------------------------------------------------------------------------------------------|----|
| GO:0016705 | oxidoreductase activity, with incorporation<br>or reduction of molecular oxygen | 40/1853 | 218/22442 | $1.34 \times 10^{-6}$ | 0.000202 | 0.00019 | _DN17770_c0_g1/TRINITY_D<br>N33878_c0_g1/TRINITY_DN9<br>224_c0_g1/TRINITY_DN45783<br>_c0_g1/TRINITY_DN23684_c0<br>_g1/TRINITY_DN10534_c0_g1<br>/TRINITY_DN868_c0_g1/TRI<br>NITY_DN8089_c0_g1/TRINIT<br>Y_DN12399_c0_g1/TRINITY_<br>DN8087_c0_g1/TRINITY_DN2<br>0304_c0_g1/TRINITY_DN1122<br>1_c0_g1/TRINITY_DN8390_c0<br>_g1/TRINITY_DN1764_c0_g1/<br>TRINITY_DN2668_c0_g1/TRI<br>NITY_DN1074_c0_g2/TRINIT<br>Y_DN15560_c0_g1/TRINITY_<br>DN11348_c0_g1/TRINITY_DN<br>40621_c0_g1/TRINITY_DN200<br>3_c0_g2/TRINITY_DN12312_c<br>0_g2/TRINITY_DN34051_c0_g<br>1/TRINITY_DN6216_c0_g1/TR<br>INITY_DN10030_c0_g1/TRINI<br>TY_DN2559_c1_g1/TRINITY_<br>DN1576_c2_g1/TRINITY_DN4<br>73_c0_g1/TRINITY_DN9651_c<br>0_g1/TRINITY_DN8819_c1_g1<br>TRINITY_DN2352_c0_g2/TRI<br>NITY_DN2531_c2_g1/TRINIT<br>Y_DN2754_c0_g1/TRINITY_D<br>N2955_c0_g2/TRINITY_DN12<br>668_c0_g1/TRINITY_DN10997<br>_c0_g1/TRINITY_DN36608_c0<br>_g1/TRINITY_DN54392_c0_g2 | 40 |
|------------|---------------------------------------------------------------------------------|---------|-----------|-----------------------|----------|---------|----------------------------------------------------------------------------------------------------------------------------------------------------------------------------------------------------------------------------------------------------------------------------------------------------------------------------------------------------------------------------------------------------------------------------------------------------------------------------------------------------------------------------------------------------------------------------------------------------------------------------------------------------------------------------------------------------------------------------------------------------------------------------------------------------------------------------------------------------------------------------------------------------------------------------------------------|----|



|            |                                             |         |          |                       |         |          |                                                                                                                                                                                                                                                                                                                                                                                                                                                                                                                                                                                                                                                                                                                  |    |
|------------|---------------------------------------------|---------|----------|-----------------------|---------|----------|------------------------------------------------------------------------------------------------------------------------------------------------------------------------------------------------------------------------------------------------------------------------------------------------------------------------------------------------------------------------------------------------------------------------------------------------------------------------------------------------------------------------------------------------------------------------------------------------------------------------------------------------------------------------------------------------------------------|----|
| GO:0035336 | long-chain fatty-acyl-CoA metabolic process | 12/1853 | 30/22442 | $2.05 \times 10^{-6}$ | 0.00028 | 0.000264 | /TRINITY_DN461_c0_g1/TRINITY_DN1949_c0_g1/TRINITY_DN14942_c0_g2/TRINITY_DN29854_c0_g1/TRINITY_DN42315_c0_g1/TRINITY_DN2871_c0_g2/TRINITY_DN482_c0_g1/TRINITY_DN35617_c0_g1/TRINITY_DN16074_c0_g1/TRINITY_DN6715_c0_g1/TRINITY_DN18271_c1_g2/TRINITY_DN19412_c0_g1/TRINITY_DN13080_c1_g2/TRINITY_DN1029_c0_g1/TRINITY_DN4749_c0_g3/TRINITY_DN30098_c0_g2/TRINITY_DN18210_c0_g1/TRINITY_DN12260_c0_g1/TRINITY_DN30772_c0_g1/TRINITY_DN2041_c0_g3/TRINITY_DN21883_c1_g1/TRINITY_DN1316_c6_g1/TRINITY_DN1062_c0_g1/TRINITY_DN13796_c0_g3/TRINITY_DN1609_c0_g1/TRINITY_DN32222_c0_g1/TRINITY_DN13080_c1_g3/TRINITY_DN11902_c0_g1/TRINITY_DN2352_c0_g1/TRINITY_DN9739_c0_g1/TRINITY_DN2801_c0_g1/TRINITY_DN22316_c0_g2 | 12 |
|            |                                             |         |          |                       |         |          | TRINITY_DN10817_c0_g1/TRINITY_DN6954_c0_g1/TRINITY_DN1143_c0_g3/TRINITY_D                                                                                                                                                                                                                                                                                                                                                                                                                                                                                                                                                                                                                                        |    |



|            |                                    |         |           |                       |          |          |                                                                                                                                                                                                                                                                                                                                                                                                                                                                                                                                                                                                                                                                                                                                                                                          |    |
|------------|------------------------------------|---------|-----------|-----------------------|----------|----------|------------------------------------------------------------------------------------------------------------------------------------------------------------------------------------------------------------------------------------------------------------------------------------------------------------------------------------------------------------------------------------------------------------------------------------------------------------------------------------------------------------------------------------------------------------------------------------------------------------------------------------------------------------------------------------------------------------------------------------------------------------------------------------------|----|
| GO:0010025 | wax biosynthetic process           | 12/1853 | 31/22442  | $3.09 \times 10^{-6}$ | 0.000372 | 0.00035  | 41571_c0_g2/TRINITY_DN11109_c0_g1/TRINITY_DN12379_c0_g1/TRINITY_DN14529_c0_g1/TRINITY_DN12688_c0_g1/TRINITY_DN17632_c0_g1/TRINITY_DN15340_c0_g2/TRINITY_DN6620_c0_g2/TRINITY_DN32303_c0_g1/TRINITY_DN6439_c1_g1/TRINITY_DN47966_c0_g1/TRINITY_DN15707_c0_g1<br>TRINITY_DN10817_c0_g1/TRINITY_DN6954_c0_g1/TRINITY_DN1143_c0_g3/TRINITY_DN18480_c0_g1/TRINITY_DN9122_c0_g1/TRINITY_DN32057_c0_g1/TRINITY_DN584_c1_g1/TRINITY_DN2762_c0_g1/TRINITY_DN1490_c0_g1/TRINITY_DN11864_c1_g1/TRINITY_DN30995_c0_g2/TRINITY_DN10734_c0_g2<br>TRINITY_DN19255_c0_g1/TRINITY_DN9456_c0_g1/TRINITY_DN1216_c0_g1/TRINITY_DN2058_c3_g1/TRINITY_DN10337_c0_g1/TRINITY_DN11659_c0_g1/TRINITY_DN1667_c0_g1/TRINITY_DN9625_c0_g1/TRINITY_DN9935_c0_g1/TRINITY_DN4527_c1_g2/TRINITY_DN10962_c0_g1/TRINITY_DN | 12 |
| GO:0022857 | transmembrane transporter activity | 53/1853 | 336/22442 | $3.72 \times 10^{-6}$ | 0.00043  | 0.000405 |                                                                                                                                                                                                                                                                                                                                                                                                                                                                                                                                                                                                                                                                                                                                                                                          | 53 |



7015\_c0\_g1/TRINITY\_DN3034  
2\_c0\_g1/TRINITY\_DN13\_c0\_g  
2/TRINITY\_DN1243\_c0\_g1/TR  
INITY\_DN2310\_c0\_g1/TRINIT  
Y\_DN498\_c0\_g1/TRINITY\_D  
N22997\_c0\_g1/TRINITY\_DN4  
5783\_c0\_g1/TRINITY\_DN1552  
\_c0\_g1/TRINITY\_DN7502\_c1\_  
g1/TRINITY\_DN35060\_c1\_g1/  
TRINITY\_DN32832\_c0\_g1/TRI  
NITY\_DN868\_c0\_g1/TRINITY  
\_DN20800\_c0\_g1/TRINITY\_D  
N22311\_c0\_g1/TRINITY\_DN2  
606\_c0\_g1/TRINITY\_DN8087\_  
c0\_g1/TRINITY\_DN3238\_c0\_g  
1/TRINITY\_DN44158\_c0\_g1/T  
RINITY\_DN16973\_c0\_g1/TRI  
NITY\_DN11271\_c0\_g3/TRINI  
TY\_DN2668\_c0\_g1/TRINITY\_  
DN16399\_c0\_g1/TRINITY\_DN  
8582\_c0\_g3/TRINITY\_DN3405  
1\_c0\_g1/TRINITY\_DN30018\_c  
0\_g1/TRINITY\_DN21797\_c0\_g  
1/TRINITY\_DN40711\_c0\_g1/T  
RINITY\_DN5851\_c0\_g1/TRIN  
ITY\_DN7339\_c1\_g1/TRINITY\_  
DN31352\_c0\_g1/TRINITY\_DN  
14345\_c0\_g2/TRINITY\_DN100  
30\_c0\_g1/TRINITY\_DN3620\_c  
0\_g1/TRINITY\_DN1774\_c0\_g1  
/TRINITY\_DN1576\_c2\_g1/TRI  
NITY\_DN2356\_c0\_g1/TRINIT

|            |                                                         |         |           |                       |          |         |                                                                                                                                                                                                                                                                                                                                                                                                                                                                                                                                                                                                                                                                                                                                                                                                    |    |
|------------|---------------------------------------------------------|---------|-----------|-----------------------|----------|---------|----------------------------------------------------------------------------------------------------------------------------------------------------------------------------------------------------------------------------------------------------------------------------------------------------------------------------------------------------------------------------------------------------------------------------------------------------------------------------------------------------------------------------------------------------------------------------------------------------------------------------------------------------------------------------------------------------------------------------------------------------------------------------------------------------|----|
| GO:0008582 | regulation of synaptic growth at neuromuscular junction | 12/1853 | 32/22442  | $4.57 \times 10^{-6}$ | 0.000509 | 0.00048 | Y_DN56286_c0_g2/TRINITY_DN7624_c0_g1/TRINITY_DN73_c0_g1/TRINITY_DN28310_c0_g1/TRINITY_DN598_c0_g1/TRINITY_DN144_c0_g1/TRINITY_DN4163_c0_g1/TRINITY_DN144_c1_g1/TRINITY_DN6005_c0_g1/TRINITY_DN2121_c1_g1/TRINITY_DN2121_c0_g1/TRINITY_DN7230_c0_g1/TRINITY_DN7230_c0_g2/TRINITY_DN11661_c0_g1/TRINITY_DN2559_c1_g1/TRINITY_DN3888_c0_g1/TRINITY_DN5168_c0_g1<br>TRINITY_DN16194_c0_g1/TRINITY_DN34305_c0_g1/TRINITY_DN7072_c0_g1/TRINITY_DN767_c0_g1/TRINITY_DN4270_c0_g1/TRINITY_DN5001_c0_g1/TRINITY_DN11395_c0_g1/TRINITY_DN3572_c0_g1/TRINITY_DN16707_c0_g1/TRINITY_DN6822_c0_g1/TRINITY_DN7398_c0_g1/TRINITY_DN10894_c0_g1/TRINITY_DN12881_c0_g1/TRINITY_DN10894_c0_g2/TRINITY_DN4955_c0_g1/TRINITY_DN12688_c0_g1/TRINITY_DN23026_c0_g1/TRINITY_DN18583_c0_g1/TRINITY_DN17632_c0_g1/TRINITY_D | 12 |
| GO:0005929 | cilium                                                  | 42/1853 | 249/22442 | $6.92 \times 10^{-6}$ | 0.000743 | 0.0007  |                                                                                                                                                                                                                                                                                                                                                                                                                                                                                                                                                                                                                                                                                                                                                                                                    | 42 |



|            |                          |         |          |                       |         |         |                                                                                                                                                                                                                                                                                                                                                                                                                                                                                                                                                                                                      |    |
|------------|--------------------------|---------|----------|-----------------------|---------|---------|------------------------------------------------------------------------------------------------------------------------------------------------------------------------------------------------------------------------------------------------------------------------------------------------------------------------------------------------------------------------------------------------------------------------------------------------------------------------------------------------------------------------------------------------------------------------------------------------------|----|
| GO:0007586 | digestion                | 16/1853 | 59/22442 | $1.56 \times 10^{-5}$ | 0.00156 | 0.00147 | g1/TRINITY_DN7223_c0_g1/TRINITY_DN2542_c0_g1/TRINITY_DN12945_c0_g2/TRINITY_DN30995_c0_g2<br>TRINITY_DN3813_c0_g1/TRINITY_DN4067_c0_g1/TRINITY_DN4735_c0_g1/TRINITY_DN9371_c0_g1/TRINITY_DN872_c0_g1/TRINITY_DN9647_c0_g1/TRINITY_DN73059_c0_g1/TRINITY_DN425_c0_g1/TRINITY_DN21632_c0_g2/TRINITY_DN461_c0_g2/TRINITY_DN25822_c0_g1/TRINITY_DN17676_c0_g1/TRINITY_DN51634_c0_g2/TRINITY_DN12351_c0_g1/TRINITY_DN54378_c0_g1/TRINITY_DN75_c0_g2<br>TRINITY_DN7331_c0_g1/TRINITY_DN381_c0_g1/TRINITY_DN384_c0_g1/TRINITY_DN2191_c0_g1/TRINITY_DN3135_c6_g1/TRINITY_DN5490_c0_g2/TRINITY_DN59401_c0_g1/T | 16 |
| GO:0006030 | chitin metabolic process | 18/1853 | 72/22442 | $1.61 \times 10^{-5}$ | 0.00156 | 0.00147 | RINITY_DN30944_c0_g1/TRINITY_DN3135_c5_g1/TRINITY_DN4096_c0_g1/TRINITY_DN1563_c0_g1/TRINITY_DN725_c0_g1/TRINITY_DN11363_c0_g1/TRINITY_DN6870_c0_g1/TRINITY_DN16595_c0_g1/TRINITY_DN23642_c0_g1/TRINI                                                                                                                                                                                                                                                                                                                                                                                                 | 18 |

|            |                                                      |         |          |                       |          |          |                                                                                                                                                                                                                                                                                                                                                                                                                                                                                                                                                                                                                                                                                                                                                                                         |    |
|------------|------------------------------------------------------|---------|----------|-----------------------|----------|----------|-----------------------------------------------------------------------------------------------------------------------------------------------------------------------------------------------------------------------------------------------------------------------------------------------------------------------------------------------------------------------------------------------------------------------------------------------------------------------------------------------------------------------------------------------------------------------------------------------------------------------------------------------------------------------------------------------------------------------------------------------------------------------------------------|----|
| GO:0007224 | smoothened signaling pathway                         | 15/1853 | 54/22442 | $2.10 \times 10^{-5}$ | 0.00197  | 0.001855 | TY_DN1022_c0_g2/TRINITY_DN813_c0_g2<br>TRINITY_DN22101_c0_g4/TRINITY_DN3460_c0_g1/TRINITY_DN11712_c0_g1/TRINITY_DN16994_c0_g1/TRINITY_DN13058_c0_g1/TRINITY_DN8676_c0_g1/TRINITY_DN15436_c0_g1/TRINITY_DN19590_c1_g2/TRINITY_DN6113_c0_g1/TRINITY_DN12487_c0_g1/TRINITY_DN13283_c0_g1/TRINITY_DN10924_c0_g1/TRINITY_DN2864_c0_g1/TRINITY_DN10229_c0_g2/TRINITY_DN2594_c0_g1<br>TRINITY_DN35198_c0_g1/TRINITY_DN2080_c0_g1/TRINITY_DN10272_c0_g1/TRINITY_DN8811_c0_g1/TRINITY_DN19996_c0_g1/TRINITY_DN28824_c0_g1/TRINITY_DN11221_c0_g1/TRINITY_DN1074_c0_g2/TRINITY_DN12312_c0_g2/TRINITY_DN8819_c1_g1<br>TRINITY_DN745_c0_g1/TRINITY_DN12857_c0_g1/TRINITY_DN4232_c0_g2/TRINITY_DN15210_c0_g1/TRINITY_DN12107_c0_g1/TRINITY_DN752_c0_g1/TRINITY_DN47223_c0_g1/TRINITY_DN29361_c0_g1/TR | 15 |
| GO:0005230 | extracellular ligand-gated ion channel activity      | 10/1853 | 26/22442 | $2.22 \times 10^{-5}$ | 0.002026 | 0.001909 | TRINITY_DN35198_c0_g1/TRINITY_DN2080_c0_g1/TRINITY_DN10272_c0_g1/TRINITY_DN8811_c0_g1/TRINITY_DN19996_c0_g1/TRINITY_DN28824_c0_g1/TRINITY_DN11221_c0_g1/TRINITY_DN1074_c0_g2/TRINITY_DN12312_c0_g2/TRINITY_DN8819_c1_g1<br>TRINITY_DN745_c0_g1/TRINITY_DN12857_c0_g1/TRINITY_DN4232_c0_g2/TRINITY_DN15210_c0_g1/TRINITY_DN12107_c0_g1/TRINITY_DN752_c0_g1/TRINITY_DN47223_c0_g1/TRINITY_DN29361_c0_g1/TR                                                                                                                                                                                                                                                                                                                                                                                | 10 |
| GO:0004553 | hydrolase activity, hydrolyzing O-glycosyl compounds | 19/1853 | 83/22442 | $3.61 \times 10^{-5}$ | 0.00319  | 0.003005 | TRINITY_DN35198_c0_g1/TRINITY_DN2080_c0_g1/TRINITY_DN10272_c0_g1/TRINITY_DN8811_c0_g1/TRINITY_DN19996_c0_g1/TRINITY_DN28824_c0_g1/TRINITY_DN11221_c0_g1/TRINITY_DN1074_c0_g2/TRINITY_DN12312_c0_g2/TRINITY_DN8819_c1_g1<br>TRINITY_DN745_c0_g1/TRINITY_DN12857_c0_g1/TRINITY_DN4232_c0_g2/TRINITY_DN15210_c0_g1/TRINITY_DN12107_c0_g1/TRINITY_DN752_c0_g1/TRINITY_DN47223_c0_g1/TRINITY_DN29361_c0_g1/TR                                                                                                                                                                                                                                                                                                                                                                                | 19 |



|            |                                                             |        |          |                       |          |          |                                                                                                                                                                                                                                                                                                                                                                                                                                                                                                                                                                                                                                                                                                                                                               |   |
|------------|-------------------------------------------------------------|--------|----------|-----------------------|----------|----------|---------------------------------------------------------------------------------------------------------------------------------------------------------------------------------------------------------------------------------------------------------------------------------------------------------------------------------------------------------------------------------------------------------------------------------------------------------------------------------------------------------------------------------------------------------------------------------------------------------------------------------------------------------------------------------------------------------------------------------------------------------------|---|
| GO:0006583 | melanin biosynthetic process from tyrosine                  | 8/1853 | 18/22442 | $4.38 \times 10^{-5}$ | 0.003762 | 0.003544 | INITY_DN71241_c0_g1/TRINITY_DN4454_c1_g1/TRINITY_DN487_c0_g1/TRINITY_DN4956_c0_g1/TRINITY_DN4423_c0_g1/TRINITY_DN96_c0_g1/TRINITY_DN8357_c0_g1/TRINITY_DN58410_c0_g1/TRINITY_DN3530_c2_g1/TRINITY_DN2001_c0_g2/TRINITY_DN1319_c1_g1<br>TRINITY_DN2618_c0_g1/TRINITY_DN9698_c0_g1/TRINITY_DN49_c0_g4/TRINITY_DN912_c0_g1/TRINITY_DN23099_c0_g1/TRINITY_DN1808_c0_g2/TRINITY_DN28190_c0_g1/TRINITY_DN14599_c0_g1/TRINITY_DN863_c0_g1/TRINITY_DN144_c0_g3/TRINITY_DN1911_c0_g1/TRINITY_DN144_c1_g2/TRINITY_DN144_c1_g1/TRINITY_DN12319_c0_g1/TRINITY_DN14988_c0_g1/TRINITY_DN2121_c0_g1<br>TRINITY_DN863_c0_g1/TRINITY_DN144_c0_g3/TRINITY_DN1911_c0_g1/TRINITY_DN144_c1_g2/TRINITY_DN144_c1_g1/TRINITY_DN12319_c0_g1/TRINITY_DN14988_c0_g1/TRINITY_DN2121_c0_g1 | 8 |
| GO:0098826 | endoplasmic reticulum tubular network membrane              | 8/1853 | 19/22442 | $7.02 \times 10^{-5}$ | 0.005341 | 0.005031 | INITY_DN71241_c0_g1/TRINITY_DN4454_c1_g1/TRINITY_DN487_c0_g1/TRINITY_DN4956_c0_g1/TRINITY_DN4423_c0_g1/TRINITY_DN96_c0_g1/TRINITY_DN8357_c0_g1/TRINITY_DN58410_c0_g1/TRINITY_DN3530_c2_g1/TRINITY_DN2001_c0_g2/TRINITY_DN1319_c1_g1<br>TRINITY_DN2618_c0_g1/TRINITY_DN9698_c0_g1/TRINITY_DN49_c0_g4/TRINITY_DN912_c0_g1/TRINITY_DN23099_c0_g1/TRINITY_DN1808_c0_g2/TRINITY_DN28190_c0_g1/TRINITY_DN14599_c0_g1/TRINITY_DN863_c0_g1/TRINITY_DN144_c0_g3/TRINITY_DN1911_c0_g1/TRINITY_DN144_c1_g2/TRINITY_DN144_c1_g1/TRINITY_DN12319_c0_g1/TRINITY_DN14988_c0_g1/TRINITY_DN2121_c0_g1<br>TRINITY_DN863_c0_g1/TRINITY_DN144_c0_g3/TRINITY_DN1911_c0_g1/TRINITY_DN144_c1_g2/TRINITY_DN144_c1_g1/TRINITY_DN12319_c0_g1/TRINITY_DN14988_c0_g1/TRINITY_DN2121_c0_g1 | 8 |
| GO:1990809 | endoplasmic reticulum tubular network membrane organization | 8/1853 | 19/22442 | $7.02 \times 10^{-5}$ | 0.005341 | 0.005031 | INITY_DN71241_c0_g1/TRINITY_DN4454_c1_g1/TRINITY_DN487_c0_g1/TRINITY_DN4956_c0_g1/TRINITY_DN4423_c0_g1/TRINITY_DN96_c0_g1/TRINITY_DN8357_c0_g1/TRINITY_DN58410_c0_g1/TRINITY_DN3530_c2_g1/TRINITY_DN2001_c0_g2/TRINITY_DN1319_c1_g1<br>TRINITY_DN2618_c0_g1/TRINITY_DN9698_c0_g1/TRINITY_DN49_c0_g4/TRINITY_DN912_c0_g1/TRINITY_DN23099_c0_g1/TRINITY_DN1808_c0_g2/TRINITY_DN28190_c0_g1/TRINITY_DN14599_c0_g1/TRINITY_DN863_c0_g1/TRINITY_DN144_c0_g3/TRINITY_DN1911_c0_g1/TRINITY_DN144_c1_g2/TRINITY_DN144_c1_g1/TRINITY_DN12319_c0_g1/TRINITY_DN14988_c0_g1/TRINITY_DN2121_c0_g1<br>TRINITY_DN863_c0_g1/TRINITY_DN144_c0_g3/TRINITY_DN1911_c0_g1/TRINITY_DN144_c1_g2/TRINITY_DN144_c1_g1/TRINITY_DN12319_c0_g1/TRINITY_DN14988_c0_g1/TRINITY_DN2121_c0_g1 | 8 |

|            |                                                  |        |          |                       |          |          |                                                                                                                                                                                                   |   |
|------------|--------------------------------------------------|--------|----------|-----------------------|----------|----------|---------------------------------------------------------------------------------------------------------------------------------------------------------------------------------------------------|---|
| GO:0102336 | 3-oxo-arachidoyl-CoA synthase activity           | 9/1853 | 24/22442 | $7.28 \times 10^{-5}$ | 0.005341 | 0.005031 | TRINITY_DN22698_c0_g1/TRINITY_DN8883_c1_g1/TRINITY_DN17518_c0_g1/TRINITY_DN79156_c0_g1/TRINITY_DN10836_c0_g1/TRINITY_DN34038_c0_g1/TRINITY_DN6234_c0_g1/TRINITY_DN1615_c0_g1/TRINITY_DN1517_c0_g3 | 9 |
| GO:0102337 | 3-oxo-cerotoyl-CoA synthase activity             | 9/1853 | 24/22442 | $7.28 \times 10^{-5}$ | 0.005341 | 0.005031 | TRINITY_DN22698_c0_g1/TRINITY_DN8883_c1_g1/TRINITY_DN17518_c0_g1/TRINITY_DN79156_c0_g1/TRINITY_DN10836_c0_g1/TRINITY_DN34038_c0_g1/TRINITY_DN6234_c0_g1/TRINITY_DN1615_c0_g1/TRINITY_DN1517_c0_g3 | 9 |
| GO:0102338 | 3-oxo-lignoceronyl-CoA synthase activity         | 9/1853 | 24/22442 | $7.28 \times 10^{-5}$ | 0.005341 | 0.005031 | TRINITY_DN22698_c0_g1/TRINITY_DN8883_c1_g1/TRINITY_DN17518_c0_g1/TRINITY_DN79156_c0_g1/TRINITY_DN10836_c0_g1/TRINITY_DN34038_c0_g1/TRINITY_DN6234_c0_g1/TRINITY_DN1615_c0_g1/TRINITY_DN1517_c0_g3 | 9 |
| GO:0102756 | very-long-chain 3-ketoacyl-CoA synthase activity | 9/1853 | 24/22442 | $7.28 \times 10^{-5}$ | 0.005341 | 0.005031 | TRINITY_DN22698_c0_g1/TRINITY_DN8883_c1_g1/TRINITY_DN17518_c0_g1/TRINITY_DN79156_c0_g1/TRINITY_DN10836_c0_g1/TRINITY_DN34038_c0_g1/TRINITY_DN6234_c0_g1/TRINITY_DN1615_c0_g1/TRINITY_DN1517_c0_g3 | 9 |

|            |                                                          |         |           |                       |          |          |                                                                                                                                                                                                                                                                                                                                                                                                                                                                                    |    |
|------------|----------------------------------------------------------|---------|-----------|-----------------------|----------|----------|------------------------------------------------------------------------------------------------------------------------------------------------------------------------------------------------------------------------------------------------------------------------------------------------------------------------------------------------------------------------------------------------------------------------------------------------------------------------------------|----|
| GO:0016614 | oxidoreductase activity, acting on CH-OH group of donors | 14/1853 | 54/22442  | $9.01 \times 10^{-5}$ | 0.006448 | 0.006074 | TRINITY_DN6443_c0_g1/TRINITY_DN2871_c0_g1/TRINITY_DN3880_c0_g1/TRINITY_DN11082_c1_g1/TRINITY_DN13622_c0_g1/TRINITY_DN2937_c1_g1/TRINITY_DN25056_c0_g1/TRINITY_DN2937_c0_g1/TRINITY_DN7660_c0_g1/TRINITY_DN2937_c0_g2/TRINITY_DN10101_c0_g1/TRINITY_DN22329_c0_g1/TRINITY_DN102432_c0_g1/TRINITY_DN40191_c0_g1                                                                                                                                                                      | 14 |
| GO:0006629 | lipid metabolic process                                  | 36/1853 | 225/22442 | $9.42 \times 10^{-5}$ | 0.006587 | 0.006205 | TRINITY_DN11877_c0_g2/TRINITY_DN10817_c0_g1/TRINITY_DN6954_c0_g1/TRINITY_DN4067_c0_g1/TRINITY_DN53219_c0_g1/TRINITY_DN4735_c0_g1/TRINITY_DN9371_c0_g1/TRINITY_DN150_c0_g1/TRINITY_DN16034_c0_g1/TRINITY_DN4708_c1_g1/TRINITY_DN73059_c0_g1/TRINITY_DN6686_c0_g2/TRINITY_DN6729_c1_g1/TRINITY_DN19122_c0_g1/TRINITY_DN32057_c0_g1/TRINITY_DN781_c0_g1/TRINITY_DN19837_c0_g1/TRINITY_DN9700_c0_g1/TRINITY_DN7128_c0_g1/TRINITY_DN12204_c0_g1/TRINITY_DN818_c0_g1/TRINITY_DN5280_c1_g | 36 |

|            |                                            |         |          |          |          |          |                                                                                                                                                                                                                                                                                                                                                                                                                                                                                                                                                                                                                                                                                                                                                                                         |    |
|------------|--------------------------------------------|---------|----------|----------|----------|----------|-----------------------------------------------------------------------------------------------------------------------------------------------------------------------------------------------------------------------------------------------------------------------------------------------------------------------------------------------------------------------------------------------------------------------------------------------------------------------------------------------------------------------------------------------------------------------------------------------------------------------------------------------------------------------------------------------------------------------------------------------------------------------------------------|----|
| GO:0005779 | integral component of peroxisomal membrane | 11/1853 | 37/22442 | 0.000134 | 0.009178 | 0.008646 | 1/TRINITY_DN1490_c0_g1/TRINITY_DN11223_c0_g2/TRINITY_DN2499_c0_g1/TRINITY_DN17676_c0_g1/TRINITY_DN5909_c1_g1/TRINITY_DN1812_c0_g1/TRINITY_DN2236_c0_g1/TRINITY_DN1719_c0_g1/TRINITY_DN30995_c0_g2/TRINITY_DN21301_c0_g1/TRINITY_DN3191_c0_g1/TRINITY_DN1812_c0_g3/TRINITY_DN8820_c0_g1/TRINITY_DN1719_c0_g4<br>TRINITY_DN10817_c0_g1/TRINITY_DN6954_c0_g1/TRINITY_DN1143_c0_g3/TRINITY_DN18480_c0_g1/TRINITY_DN9122_c0_g1/TRINITY_DN584_c1_g1/TRINITY_DN2762_c0_g1/TRINITY_DN1490_c0_g1/TRINITY_DN11864_c1_g1/TRINITY_DN7282_c0_g2/TRINITY_DN10734_c0_g2<br>TRINITY_DN2531_c2_g1/TRINITY_DN2955_c0_g2/TRINITY_DN54392_c0_g2/TRINITY_DN1949_c0_g1/TRINITY_DN2871_c0_g2/TRINITY_DN482_c0_g1/TRINITY_DN35617_c0_g1/TRINITY_DN18271_c1_g2/TRINITY_DN19412_c0_g1/TRINITY_DN13080_c1_g2/TRINI | 11 |
| GO:0070330 | aromatase activity                         | 18/1853 | 84/22442 | 0.000142 | 0.009512 | 0.008961 |                                                                                                                                                                                                                                                                                                                                                                                                                                                                                                                                                                                                                                                                                                                                                                                         | 18 |

|            |                           |         |           |          |          |          |                                                                                                                                                                                                                                                                                                                                                                                                                                                                                                                                                                                                                                                                                                                                                                                           |    |
|------------|---------------------------|---------|-----------|----------|----------|----------|-------------------------------------------------------------------------------------------------------------------------------------------------------------------------------------------------------------------------------------------------------------------------------------------------------------------------------------------------------------------------------------------------------------------------------------------------------------------------------------------------------------------------------------------------------------------------------------------------------------------------------------------------------------------------------------------------------------------------------------------------------------------------------------------|----|
| GO:0018095 | protein polyglutamylation | 7/1853  | 16/22442  | 0.000152 | 0.009918 | 0.009343 | TY_DN1029_c0_g1/TRINITY_DN4749_c0_g3/TRINITY_DN18210_c0_g1/TRINITY_DN30772_c0_g1/TRINITY_DN21883_c1_g1/TRINITY_DN1316_c6_g1/TRINITY_DN2801_c0_g1/TRINITY_DN22316_c0_g2/TRINITY_DN5400_c0_g1/TRINITY_DN19594_c0_g1/TRINITY_DN8472_c0_g1/TRINITY_DN14808_c1_g1/TRINITY_DN8698_c0_g1/TRINITY_DN38209_c0_g1/TRINITY_DN24749_c0_g1<br>TRINITY_DN4067_c0_g1/TRINITY_DN4735_c0_g1/TRINITY_DN9371_c0_g1/TRINITY_DN1717_c4_g1/TRINITY_DN7275_c0_g1/TRINITY_DN4708_c1_g1/TRINITY_DN3261_c0_g1/TRINITY_DN23560_c0_g1/TRINITY_DN4369_c0_g1/TRINITY_DN16662_c0_g1/TRINITY_DN73059_c0_g1/TRINITY_DN2904_c0_g1/TRINITY_DN114_c0_g1/TRINITY_DN19837_c0_g1/TRINITY_DN20592_c0_g1/TRINITY_DN1754_c0_g1/TRINITY_DN15069_c0_g1/TRINITY_DN4581_c0_g1/TRINITY_DN5280_c1_g1/TRINITY_DN4736_c0_g3/TRINITY_DN17676 | 7  |
| GO:0016042 | lipid catabolic process   | 25/1853 | 139/22442 | 0.000169 | 0.010823 | 0.010195 |                                                                                                                                                                                                                                                                                                                                                                                                                                                                                                                                                                                                                                                                                                                                                                                           | 25 |

|            |                                                                        |         |           |          |          |          |                                                                                                                                                                                                                                                                                                                                                                                                                                                                                                                                                                                                                                                                                                                                                                                     |    |
|------------|------------------------------------------------------------------------|---------|-----------|----------|----------|----------|-------------------------------------------------------------------------------------------------------------------------------------------------------------------------------------------------------------------------------------------------------------------------------------------------------------------------------------------------------------------------------------------------------------------------------------------------------------------------------------------------------------------------------------------------------------------------------------------------------------------------------------------------------------------------------------------------------------------------------------------------------------------------------------|----|
| GO:0010248 | establishment or maintenance of transmembrane electrochemical gradient | 6/1853  | 12/22442  | 0.000188 | 0.011724 | 0.011044 | _c0_g1/TRINITY_DN1537_c0_g2/TRINITY_DN51922_c0_g1/TRINITY_DN7_c0_g2/TRINITY_DN7445_c0_g1/TRINITY_DN10962_c0_g1/TRINITY_DN21424_c0_g1/TRINITY_DN3457_c0_g1/TRINITY_DN28307_c0_g3/TRINITY_DN5429_c0_g1/TRINITY_DN4595_c0_g1/TRINITY_DN97_c0_g1/TRINITY_DN2137_c0_g2/TRINITY_DN2137_c0_g1/TRINITY_DN2898_c0_g1/TRINITY_DN97_c1_g1/TRINITY_DN5639_c0_g1/TRINITY_DN8621_c0_g1/TRINITY_DN5930_c0_g1/TRINITY_DN2108_c0_g1/TRINITY_DN15974_c0_g1/TRINITY_DN752_c0_g1/TRINITY_DN20294_c1_g1/TRINITY_DN47223_c0_g1/TRINITY_DN6352_c0_g1/TRINITY_DN7894_c0_g2/TRINITY_DN702_c0_g1/TRINITY_DN71241_c0_g1/TRINITY_DN6251_c0_g1/TRINITY_DN4956_c0_g1/TRINITY_DN4423_c0_g1/TRINITY_DN96_c0_g1/TRINITY_DN4495_c0_g1/TRINITY_DN8979_c0_g1/TRINITY_DN22087_c0_g2/TRINITY_DN4703_c0_g1/TRINITY_DN58410 | 6  |
| GO:0030246 | carbohydrate binding                                                   | 29/1853 | 173/22442 | 0.000192 | 0.011724 | 0.011044 |                                                                                                                                                                                                                                                                                                                                                                                                                                                                                                                                                                                                                                                                                                                                                                                     | 29 |

|            |                            |         |           |          |          |          |                                                                                                                                                                                                                                                                                                                                                                                                                                                                                                                                                                                                                                                                                                                                                                                                     |    |
|------------|----------------------------|---------|-----------|----------|----------|----------|-----------------------------------------------------------------------------------------------------------------------------------------------------------------------------------------------------------------------------------------------------------------------------------------------------------------------------------------------------------------------------------------------------------------------------------------------------------------------------------------------------------------------------------------------------------------------------------------------------------------------------------------------------------------------------------------------------------------------------------------------------------------------------------------------------|----|
| GO:0008237 | metallopeptidase activity  | 18/1853 | 86/22442  | 0.000195 | 0.011724 | 0.011044 | _c0_g1/TRINITY_DN6784_c0_g1/TRINITY_DN6876_c0_g1/TRINITY_DN22087_c0_g1/TRINITY_DN5781_c0_g1/TRINITY_DN7271_c0_g1/TRINITY_DN15191_c0_g1/TRINITY_DN8267_c0_g1/TRINITY_DN1448_c0_g2/TRINITY_DN7996_c0_g1/TRINITY_DN18930_c0_g1/TRINITY_DN2723_c0_g1/TRINITY_DN47563_c0_g1/TRINITY_DN8234_c0_g1/TRINITY_DN1346_c0_g1/TRINITY_DN864_c0_g1/TRINITY_DN29497_c0_g2/TRINITY_DN5615_c0_g1/TRINITY_DN1076_c0_g1/TRINITY_DN6125_c0_g1/TRINITY_DN1107_c0_g1/TRINITY_DN14597_c0_g1/TRINITY_DN6620_c0_g1/TRINITY_DN16194_c0_g1/TRINITY_DN13077_c0_g1/TRINITY_DN12837_c0_g1/TRINITY_DN33652_c0_g1/TRINITY_DN12688_c0_g1/TRINITY_DN6439_c1_g2/TRINITY_DN23026_c0_g1/TRINITY_DN17632_c0_g1/TRINITY_DN15340_c0_g2/TRINITY_DN23273_c0_g1/TRINITY_DN5804_c0_g1/TRINITY_DN6620_c0_g2/TRINITY_DN32303_c0_g1/TRINITY_DN1105 | 18 |
| GO:0003777 | microtubule motor activity | 24/1853 | 134/22442 | 0.000241 | 0.014236 | 0.01341  |                                                                                                                                                                                                                                                                                                                                                                                                                                                                                                                                                                                                                                                                                                                                                                                                     | 24 |

|            |                                             |         |          |          |          |          |                                                                                                                                                                                                                                                                                                                                                                                                                                                                                                                                                                                                                                                                                                                                                                                            |    |
|------------|---------------------------------------------|---------|----------|----------|----------|----------|--------------------------------------------------------------------------------------------------------------------------------------------------------------------------------------------------------------------------------------------------------------------------------------------------------------------------------------------------------------------------------------------------------------------------------------------------------------------------------------------------------------------------------------------------------------------------------------------------------------------------------------------------------------------------------------------------------------------------------------------------------------------------------------------|----|
| GO:0050662 | coenzyme binding                            | 16/1853 | 74/22442 | 0.000294 | 0.016808 | 0.015833 | _c0_g1/TRINITY_DN28402_c0_g1/TRINITY_DN6439_c1_g1/TRINITY_DN33652_c1_g1/TRINITY_DN22894_c0_g1/TRINITY_DN47966_c0_g1/TRINITY_DN3140_c1_g1/TRINITY_DN21521_c0_g1/TRINITY_DN11321_c0_g1/TRINITY_DN15707_c0_g1<br>TRINITY_DN10817_c0_g1/TRINITY_DN6954_c0_g1/TRINITY_DN1123_c1_g1/TRINITY_DN1143_c0_g3/TRINITY_DN18480_c0_g1/TRINITY_DN19122_c0_g1/TRINITY_DN584_c1_g1/TRINITY_DN5522_c0_g1/TRINITY_DN2762_c0_g1/TRINITY_DN7223_c0_g1/TRINITY_DN11864_c1_g1/TRINITY_DN3621_c0_g1/TRINITY_DN30995_c0_g2/TRINITY_DN22520_c0_g1/TRINITY_DN27557_c0_g1/TRINITY_DN10734_c0_g2/TRINITY_DN9038_c0_g1/TRINITY_DN13801_c0_g1/TRINITY_DN13223_c0_g1/TRINITY_DN12075_c0_g1/TRINITY_DN1352_c0_g1/TRINITY_DN1295_c0_g1/TRINITY_DN1715_c0_g1/TRINITY_DN5591_c2_g1/TRINITY_DN8671_c0_g1/TRINITY_DN12050_c0_g1 | 16 |
| GO:0034446 | substrate adhesion-dependent cell spreading | 10/1853 | 34/22442 | 0.000298 | 0.016808 | 0.015833 | N1352_c0_g1/TRINITY_DN1295_c0_g1/TRINITY_DN1715_c0_g1/TRINITY_DN5591_c2_g1/TRINITY_DN8671_c0_g1/TRINITY_DN12050_c0_g1                                                                                                                                                                                                                                                                                                                                                                                                                                                                                                                                                                                                                                                                      | 10 |



|            |                                 |         |           |          |          |          |                                                                                                                                                                                                                                                                                                                                                                                                                                                                                                                                                                                                                                                                                                                                                                          |    |
|------------|---------------------------------|---------|-----------|----------|----------|----------|--------------------------------------------------------------------------------------------------------------------------------------------------------------------------------------------------------------------------------------------------------------------------------------------------------------------------------------------------------------------------------------------------------------------------------------------------------------------------------------------------------------------------------------------------------------------------------------------------------------------------------------------------------------------------------------------------------------------------------------------------------------------------|----|
| GO:0008340 | determination of adult lifespan | 23/1853 | 128/22442 | 0.000307 | 0.016808 | 0.015833 | TRINITY_DN3754_c0_g1/TRINITY_DN3172_c0_g1/TRINITY_DN9232_c0_g1/TRINITY_DN8249_c0_g1/TRINITY_DN60_c0_g2/TRINITY_DN13801_c0_g1/TRINITY_DN48546_c0_g1/TRINITY_DN8400_c0_g1/TRINITY_DN124461_c0_g1/TRINITY_DN318_c0_g1/TRINITY_DN22284_c0_g1/TRINITY_DN16714_c0_g1/TRINITY_DN29492_c0_g1/TRINITY_DN7230_c0_g2/TRINITY_DN5261_c0_g1/TRINITY_DN29892_c0_g1/TRINITY_DN10137_c0_g1/TRINITY_DN27419_c0_g1/TRINITY_DN2393_c0_g1/TRINITY_DN17400_c0_g1/TRINITY_DN10138_c0_g1/TRINITY_DN33651_c0_g1<br>TRINITY_DN745_c0_g1/TRINITY_DN2898_c0_g1/TRINITY_DN9813_c0_g1/TRINITY_DN9846_c0_g1/TRINITY_DN16732_c0_g1/TRINITY_DN12857_c0_g1/TRINITY_DN2112_c0_g1/TRINITY_DN4232_c0_g2/TRINITY_DN15210_c0_g1/TRINITY_DN8204_c0_g1/TRINITY_DN12107_c0_g1/TRINITY_DN12651_c0_g2/TRINITY_DN259 | 23 |
| GO:0005975 | carbohydrate metabolic process  | 43/1853 | 302/22442 | 0.000314 | 0.016808 | 0.015833 |                                                                                                                                                                                                                                                                                                                                                                                                                                                                                                                                                                                                                                                                                                                                                                          | 43 |

|            |                |         |           |          |          |          |                                                                                                                                                                                                                                                                                                                                                                                                                                                                                                                                                                                                                                                                                                                                                                                                 |    |
|------------|----------------|---------|-----------|----------|----------|----------|-------------------------------------------------------------------------------------------------------------------------------------------------------------------------------------------------------------------------------------------------------------------------------------------------------------------------------------------------------------------------------------------------------------------------------------------------------------------------------------------------------------------------------------------------------------------------------------------------------------------------------------------------------------------------------------------------------------------------------------------------------------------------------------------------|----|
| GO:0030286 | dynein complex | 32/1853 | 204/22442 | 0.000323 | 0.016808 | 0.015833 | 6_c0_g1/TRINITY_DN12651_c0_g1/TRINITY_DN752_c0_g1/TRINITY_DN21888_c0_g1/TRINITY_DN47223_c0_g1/TRINITY_DN5917_c0_g1/TRINITY_DN29361_c0_g1/TRINITY_DN71241_c0_g1/TRINITY_DN4454_c1_g1/TRINITY_DN487_c0_g1/TRINITY_DN16048_c0_g1/TRINITY_DN5138_c0_g1/TRINITY_DN4956_c0_g1/TRINITY_DN54367_c0_g2/TRINITY_DN4423_c0_g1/TRINITY_DN96_c0_g1/TRINITY_DN4495_c0_g1/TRINITY_DN4096_c0_g1/TRINITY_DN3543_c0_g1/TRINITY_DN8357_c0_g1/TRINITY_DN1978_c0_g3/TRINITY_DN10314_c0_g1/TRINITY_DN58410_c0_g1/TRINITY_DN65013_c0_g1/TRINITY_DN3530_c2_g1/TRINITY_DN29983_c0_g1/TRINITY_DN2001_c0_g2/TRINITY_DN1319_c1_g1/TRINITY_DN9962_c0_g1/TRINITY_DN4401_c0_g2/TRINITY_DN10882_c0_g1/TRINITY_DN6620_c0_g1/TRINITY_DN16194_c0_g1/TRINITY_DN34305_c0_g1/TRINITY_DN1579_c0_g1/TRINITY_DN13077_c0_g1/TRINITY_DN128 | 32 |
|------------|----------------|---------|-----------|----------|----------|----------|-------------------------------------------------------------------------------------------------------------------------------------------------------------------------------------------------------------------------------------------------------------------------------------------------------------------------------------------------------------------------------------------------------------------------------------------------------------------------------------------------------------------------------------------------------------------------------------------------------------------------------------------------------------------------------------------------------------------------------------------------------------------------------------------------|----|



|            |                    |         |           |          |          |          |                                                                                                                                                                                                                                                                                                                                                                                                                                                                                                                                                                                                                                                                                                                                                                                                                                                                                           |    |
|------------|--------------------|---------|-----------|----------|----------|----------|-------------------------------------------------------------------------------------------------------------------------------------------------------------------------------------------------------------------------------------------------------------------------------------------------------------------------------------------------------------------------------------------------------------------------------------------------------------------------------------------------------------------------------------------------------------------------------------------------------------------------------------------------------------------------------------------------------------------------------------------------------------------------------------------------------------------------------------------------------------------------------------------|----|
| GO:0003824 | catalytic activity | 39/1853 | 267/22442 | 0.000349 | 0.017775 | 0.016744 | <p>Y_DN1352_c0_g1/TRINITY_DN1295_c0_g1/TRINITY_DN1715_c0_g1/TRINITY_DN12050_c0_g1</p> <p>TRINITY_DN7803_c0_g1/TRINITY_DN10817_c0_g1/TRINITY_DN6954_c0_g1/TRINITY_DN1716_c0_g1/TRINITY_DN123_c1_g1/TRINITY_DN13977_c0_g1/TRINITY_DN8030_c0_g1/TRINITY_DN4248_c0_g1/TRINITY_DN8735_c0_g1/TRINITY_DN1143_c0_g3/TRINITY_DN5340_c0_g3/TRINITY_DN14080_c0_g1/TRINITY_DN18480_c0_g1/TRINITY_DN19122_c0_g1/TRINITY_DN584_c1_g1/TRINITY_DN4357_c0_g1/TRINITY_DN1548_c2_g3/TRINITY_DN12704_c0_g1/TRINITY_DN19102_c0_g1/TRINITY_DN54367_c0_g2/TRINITY_DN28150_c0_g1/TRINITY_DN5522_c0_g1/TRINITY_DN9699_c1_g1/TRINITY_DN2762_c0_g1/TRINITY_DN278_c1_g1/TRINITY_DN7223_c0_g1/TRINITY_DN10314_c0_g1/TRINITY_DN16342_c0_g1/TRINITY_DN11864_c1_g1/TRINITY_DN6036_c0_g1/TRINITY_DN788_c0_g1/TRINITY_DN3621_c0_g1/TRINITY_DN1352_c0_g1/TRINITY_DN1295_c0_g1/TRINITY_DN1715_c0_g1/TRINITY_DN12050_c0_g1</p> | 39 |
|------------|--------------------|---------|-----------|----------|----------|----------|-------------------------------------------------------------------------------------------------------------------------------------------------------------------------------------------------------------------------------------------------------------------------------------------------------------------------------------------------------------------------------------------------------------------------------------------------------------------------------------------------------------------------------------------------------------------------------------------------------------------------------------------------------------------------------------------------------------------------------------------------------------------------------------------------------------------------------------------------------------------------------------------|----|

|            |                                   |         |           |          |          |          |                                                                                                                                                                                                                                                                                                                                                                                                                                                                     |    |
|------------|-----------------------------------|---------|-----------|----------|----------|----------|---------------------------------------------------------------------------------------------------------------------------------------------------------------------------------------------------------------------------------------------------------------------------------------------------------------------------------------------------------------------------------------------------------------------------------------------------------------------|----|
| GO:0004356 | glutamate-ammonia ligase activity | 7/1853  | 18/22442  | 0.000364 | 0.017951 | 0.01691  | Y_DN7_c0_g2/TRINITY_DN1567_c0_g1/TRINITY_DN30995_c0_g2/TRINITY_DN3191_c0_g1/TRINITY_DN22520_c0_g1/TRINITY_DN27557_c0_g1/TRINITY_DN10734_c0_g2<br>TRINITY_DN6327_c0_g1/TRINITY_DN13857_c0_g1/TRINITY_DN20347_c0_g1/TRINITY_DN25935_c0_g1/TRINITY_DN35034_c0_g4/TRINITY_DN3033_c0_g2/TRINITY_DN37526_c0_g1<br>TRINITY_DN6327_c0_g1/TRINITY_DN13857_c0_g1/TRINITY_DN20347_c0_g1/TRINITY_DN25935_c0_g1/TRINITY_DN35034_c0_g4/TRINITY_DN3033_c0_g2/TRINITY_DN37526_c0_g1 | 7  |
| GO:0006542 | glutamine biosynthetic process    | 7/1853  | 18/22442  | 0.000364 | 0.017951 | 0.01691  | TRINITY_DN19567_c0_g1/TRINITY_DN647_c0_g1/TRINITY_DN1217_c0_g1/TRINITY_DN2286_c0_g3/TRINITY_DN14089_c0_g1/TRINITY_DN7146_c0_g1/TRINITY_DN10957_c0_g1/TRINITY_DN16716_c0_g1/TRINITY_DN2596_c0_g1/TRINITY_DN19631_c0_g1/TRINITY_DN9929_c0_g1/TRINITY_DN9224_c0_g1/TRINITY_DN20294_c1_g1/TRINITY_DN10534_c0                                                                                                                                                            | 7  |
| GO:0005764 | lysosome                          | 45/1853 | 323/22442 | 0.000376 | 0.018148 | 0.017095 |                                                                                                                                                                                                                                                                                                                                                                                                                                                                     | 45 |

|            |                                              |         |          |         |          |          |                                                                                                                                                                                                                                                                                                                                                                                                                                                                                                                                                                                                                                                                                                                                                                                                                                                                                                                                           |    |
|------------|----------------------------------------------|---------|----------|---------|----------|----------|-------------------------------------------------------------------------------------------------------------------------------------------------------------------------------------------------------------------------------------------------------------------------------------------------------------------------------------------------------------------------------------------------------------------------------------------------------------------------------------------------------------------------------------------------------------------------------------------------------------------------------------------------------------------------------------------------------------------------------------------------------------------------------------------------------------------------------------------------------------------------------------------------------------------------------------------|----|
| GO:0015574 | trehalose transmembrane transporter activity | 17/1853 | 83/22442 | 0.00038 | 0.018148 | 0.017095 | _g1/TRINITY_DN114_c0_g1/T<br>RINITY_DN4321_c0_g1/TRIN<br>ITY_DN702_c0_g1/TRINITY_<br>DN14025_c0_g1/TRINITY_DN<br>21401_c0_g1/TRINITY_DN863<br>4_c0_g2/TRINITY_DN2886_c2<br>_g1/TRINITY_DN8634_c0_g1/<br>TRINITY_DN430_c0_g1/TRIN<br>ITY_DN4956_c0_g1/TRINITY_<br>DN1742_c0_g1/TRINITY_DN2<br>5822_c0_g1/TRINITY_DN8357<br>_c0_g1/TRINITY_DN4578_c0_<br>g2/TRINITY_DN11686_c0_g1/<br>TRINITY_DN34051_c0_g1/TRI<br>NITY_DN29497_c0_g2/TRINI<br>TY_DN1396_c0_g1/TRINITY_<br>DN9840_c0_g2/TRINITY_DN2<br>236_c0_g1/TRINITY_DN3402_<br>c0_g1/TRINITY_DN1587_c0_g<br>1/TRINITY_DN21874_c0_g1/T<br>RINITY_DN3079_c0_g1/TRIN<br>ITY_DN2788_c2_g1/TRINITY_<br>DN6894_c0_g1/TRINITY_DN1<br>7400_c0_g1/TRINITY_DN1319<br>_c1_g1/TRINITY_DN1507_c0_<br>g1/TRINITY_DN6608_c0_g3/T<br>RINITY_DN17065_c0_g1<br>TRINITY_DN2058_c3_g1/TRI<br>NITY_DN9935_c0_g1/TRINIT<br>Y_DN7015_c0_g1/TRINITY_D<br>N2310_c0_g1/TRINITY_DN22<br>997_c0_g1/TRINITY_DN7502_ | 17 |
|------------|----------------------------------------------|---------|----------|---------|----------|----------|-------------------------------------------------------------------------------------------------------------------------------------------------------------------------------------------------------------------------------------------------------------------------------------------------------------------------------------------------------------------------------------------------------------------------------------------------------------------------------------------------------------------------------------------------------------------------------------------------------------------------------------------------------------------------------------------------------------------------------------------------------------------------------------------------------------------------------------------------------------------------------------------------------------------------------------------|----|

|            |                                  |         |          |          |          |          |                                                                                                                                                                                                                                                                                                                                                                                                                                                                                                                                                                                                                                                                                                                                                                         |    |
|------------|----------------------------------|---------|----------|----------|----------|----------|-------------------------------------------------------------------------------------------------------------------------------------------------------------------------------------------------------------------------------------------------------------------------------------------------------------------------------------------------------------------------------------------------------------------------------------------------------------------------------------------------------------------------------------------------------------------------------------------------------------------------------------------------------------------------------------------------------------------------------------------------------------------------|----|
| GO:0008611 | ether lipid biosynthetic process | 13/1853 | 55/22442 | 0.000428 | 0.020129 | 0.018962 | c1_g1/TRINITY_DN35060_c1_g1/TRINITY_DN32832_c0_g1/TRINITY_DN20800_c0_g1/TRINITY_DN44158_c0_g1/TRINITY_DN16399_c0_g1/TRINITY_DN30018_c0_g1/TRINITY_DN31352_c0_g1/TRINITY_DN14345_c0_g2/TRINITY_DN56286_c0_g2/TRINITY_DN7624_c0_g1/TRINITY_DN598_c0_g1/TRINITY_DN10817_c0_g1/TRINITY_DN6954_c0_g1/TRINITY_DN1143_c0_g3/TRINITY_DN61713_c0_g1/TRINITY_DN18480_c0_g1/TRINITY_DN19122_c0_g1/TRINITY_DN584_c1_g1/TRINITY_DN38156_c0_g1/TRINITY_DN18333_c0_g1/TRINITY_DN2762_c0_g1/TRINITY_DN1490_c0_g1/TRINITY_DN11864_c1_g1/TRINITY_DN10734_c0_g2/TRINITY_DN7175_c0_g1/TRINITY_DN5268_c0_g1/TRINITY_DN5141_c0_g1/TRINITY_DN5001_c0_g1/TRINITY_DN4202_c0_g1/TRINITY_DN8480_c0_g1/TRINITY_DN6225_c1_g1/TRINITY_DN6785_c0_g1/TRINITY_DN5776_c0_g1/TRINITY_DN258_c0_g2/TRINITY_D | 13 |
| GO:0007286 | spermatid development            | 12/1853 | 49/22442 | 0.0005   | 0.023114 | 0.021774 |                                                                                                                                                                                                                                                                                                                                                                                                                                                                                                                                                                                                                                                                                                                                                                         | 12 |

|            |                                              |         |           |          |          |          |                                                                                                                                                                                                                                                                                                                                                                                                                                                                                                                                                       |    |
|------------|----------------------------------------------|---------|-----------|----------|----------|----------|-------------------------------------------------------------------------------------------------------------------------------------------------------------------------------------------------------------------------------------------------------------------------------------------------------------------------------------------------------------------------------------------------------------------------------------------------------------------------------------------------------------------------------------------------------|----|
| GO:0042811 | pheromone biosynthetic process               | 6/1853  | 14/22442  | 0.000528 | 0.023686 | 0.022313 | N7088_c0_g1/TRINITY_DN11156_c0_g1<br>TRINITY_DN6729_c1_g1/TRINITY_DN560_c1_g2/TRINITY_DN9700_c0_g1/TRINITY_DN1719_c0_g1/TRINITY_DN13630_c0_g1/TRINITY_DN1719_c0_g4                                                                                                                                                                                                                                                                                                                                                                                    | 6  |
| GO:0050062 | long-chain-fatty-acyl-CoA reductase activity | 6/1853  | 14/22442  | 0.000528 | 0.023686 | 0.022313 | TRINITY_DN10817_c0_g1/TRINITY_DN6954_c0_g1/TRINITY_DN19122_c0_g1/TRINITY_DN32057_c0_g1/TRINITY_DN1490_c0_g1/TRINITY_DN30995_c0_g2<br>TRINITY_DN7331_c0_g1/TRINITY_DN381_c0_g1/TRINITY_DN384_c0_g1/TRINITY_DN2191_c0_g1/TRINITY_DN3135_c6_g1/TRINITY_DN5490_c0_g2/TRINITY_DN59401_c0_g1/TRINITY_DN30944_c0_g1/TRINITY_DN16048_c0_g1/TRINITY_DN3135_c5_g1/TRINITY_DN4096_c0_g1/TRINITY_DN1563_c0_g1/TRINITY_DN725_c0_g1/TRINITY_DN11363_c0_g1/TRINITY_DN6870_c0_g1/TRINITY_DN16595_c0_g1/TRINITY_DN23642_c0_g1/TRINITY_DN1022_c0_g2/TRINITY_DN813_c0_g2 | 6  |
| GO:0008061 | chitin binding                               | 19/1853 | 101/22442 | 0.000551 | 0.024359 | 0.022946 | TRINITY_DN3135_c5_g1/TRINITY_DN4096_c0_g1/TRINITY_DN1563_c0_g1/TRINITY_DN725_c0_g1/TRINITY_DN11363_c0_g1/TRINITY_DN6870_c0_g1/TRINITY_DN16595_c0_g1/TRINITY_DN23642_c0_g1/TRINITY_DN1022_c0_g2/TRINITY_DN813_c0_g2                                                                                                                                                                                                                                                                                                                                    | 19 |



|            |                                                      |         |           |          |          |          |                                                                                                                                                                                                                                                                                                                                                                                                                                                                                                                                                                                                                                                                                                                                                                                                              |    |
|------------|------------------------------------------------------|---------|-----------|----------|----------|----------|--------------------------------------------------------------------------------------------------------------------------------------------------------------------------------------------------------------------------------------------------------------------------------------------------------------------------------------------------------------------------------------------------------------------------------------------------------------------------------------------------------------------------------------------------------------------------------------------------------------------------------------------------------------------------------------------------------------------------------------------------------------------------------------------------------------|----|
| GO:0015771 | trehalose transport                                  | 17/1853 | 86/22442  | 0.000586 | 0.025554 | 0.024072 | TRINITY_DN2058_c3_g1/TRINITY_DN9935_c0_g1/TRINITY_DN7015_c0_g1/TRINITY_DN2310_c0_g1/TRINITY_DN22997_c0_g1/TRINITY_DN7502_c1_g1/TRINITY_DN35060_c1_g1/TRINITY_DN32832_c0_g1/TRINITY_DN20800_c0_g1/TRINITY_DN44158_c0_g1/TRINITY_DN16399_c0_g1/TRINITY_DN30018_c0_g1/TRINITY_DN31352_c0_g1/TRINITY_DN14345_c0_g2/TRINITY_DN56286_c0_g2/TRINITY_DN7624_c0_g1/TRINITY_DN598_c0_g1/TRINITY_DN10817_c0_g1/TRINITY_DN6954_c0_g1/TRINITY_DN1143_c0_g3/TRINITY_DN19122_c0_g1/TRINITY_DN584_c1_g1/TRINITY_DN1490_c0_g1/TRINITY_DN7223_c0_g1/TRINITY_DN30995_c0_g2/TRINITY_DN11877_c0_g2/TRINITY_DN1716_c0_g1/TRINITY_DN1539_c0_g1/TRINITY_DN61713_c0_g1/TRINITY_DN6729_c1_g1/TRINITY_DN8292_c0_g1/TRINITY_DN9700_c0_g1/TRINITY_DN17360_c0_g2/TRINITY_DN38156_c0_g1/TRINITY_DN18333_c0_g1/TRINITY_DN79156_c0_g1/TRINITY | 17 |
| GO:0003854 | 3-beta-hydroxy-delta5-steroid dehydrogenase activity | 8/1853  | 25/22442  | 0.000641 | 0.027531 | 0.025934 |                                                                                                                                                                                                                                                                                                                                                                                                                                                                                                                                                                                                                                                                                                                                                                                                              | 8  |
| GO:0006633 | fatty acid biosynthetic process                      | 23/1853 | 136/22442 | 0.000745 | 0.031553 | 0.029723 |                                                                                                                                                                                                                                                                                                                                                                                                                                                                                                                                                                                                                                                                                                                                                                                                              | 23 |

|            |                                            |         |          |          |         |          |                                                                                                                                                                                                                                                                                                                                                                                                                                                                                                                                                                                                                                                                                                                                                                                 |    |
|------------|--------------------------------------------|---------|----------|----------|---------|----------|---------------------------------------------------------------------------------------------------------------------------------------------------------------------------------------------------------------------------------------------------------------------------------------------------------------------------------------------------------------------------------------------------------------------------------------------------------------------------------------------------------------------------------------------------------------------------------------------------------------------------------------------------------------------------------------------------------------------------------------------------------------------------------|----|
| GO:0004806 | triglyceride lipase activity               | 15/1853 | 73/22442 | 0.000793 | 0.03281 | 0.030907 | _DN53472_c0_g1/TRINITY_DN10836_c0_g1/TRINITY_DN6063_c0_g2/TRINITY_DN1817_c0_g1/TRINITY_DN25253_c0_g1/TRINITY_DN6234_c0_g1/TRINITY_DN1615_c0_g1/TRINITY_DN1517_c0_g3/TRINITY_DN1719_c0_g1/TRINITY_DN51922_c0_g1/TRINITY_DN12865_c0_g1/TRINITY_DN1719_c0_g4<br>TRINITY_DN9371_c0_g1/TRINITY_DN1539_c0_g1/TRINITY_DN4708_c1_g1/TRINITY_DN3261_c0_g1/TRINITY_DN23560_c0_g1/TRINITY_DN4369_c0_g3/TRINITY_DN20592_c0_g1/TRINITY_DN5280_c1_g1/TRINITY_DN4736_c0_g3/TRINITY_DN2499_c0_g1/TRINITY_DN1537_c0_g2/TRINITY_DN1126_c0_g2/TRINITY_DN12899_c0_g1/TRINITY_DN7445_c0_g1/TRINITY_DN3191_c0_g1/TRINITY_DN21424_c0_g1/TRINITY_DN8400_c0_g1/TRINITY_DN3457_c0_g1/TRINITY_DN28307_c0_g3/TRINITY_DN5429_c0_g1/TRINITY_DN4595_c0_g1<br>TRINITY_DN4912_c0_g1/TRINITY_DN9212_c0_g1/TRINITY | 15 |
| GO:0005890 | sodium:potassium-exchanging ATPase complex | 6/1853  | 15/22442 | 0.000818 | 0.03281 | 0.030907 |                                                                                                                                                                                                                                                                                                                                                                                                                                                                                                                                                                                                                                                                                                                                                                                 | 6  |
| GO:0006565 | L-serine catabolic process                 | 6/1853  | 15/22442 | 0.000818 | 0.03281 | 0.030907 |                                                                                                                                                                                                                                                                                                                                                                                                                                                                                                                                                                                                                                                                                                                                                                                 | 6  |

|            |                                               |         |          |          |          |          |                                                                                                                                                                                                                                                                                                                                                                                                                                                                                                                                                                                                                                                                                                      |    |
|------------|-----------------------------------------------|---------|----------|----------|----------|----------|------------------------------------------------------------------------------------------------------------------------------------------------------------------------------------------------------------------------------------------------------------------------------------------------------------------------------------------------------------------------------------------------------------------------------------------------------------------------------------------------------------------------------------------------------------------------------------------------------------------------------------------------------------------------------------------------------|----|
| GO:0097067 | cellular response to thyroid hormone stimulus | 6/1853  | 15/22442 | 0.000818 | 0.03281  | 0.030907 | Y_DN21275_c0_g1/TRINITY_DN6496_c0_g1/TRINITY_DN8413_c0_g1/TRINITY_DN1251_c0_g1<br>TRINITY_DN647_c0_g1/TRINITY_DN1217_c0_g1/TRINITY_DN10957_c0_g1/TRINITY_DN4321_c0_g1/TRINITY_DN1587_c0_g1/TRINITY_DN21874_c0_g1<br>TRINITY_DN863_c0_g1/TRINITY_DN144_c0_g3/TRINITY_DN1911_c0_g1/TRINITY_DN144_c0_g1/TRINITY_DN4163_c0_g1/TRINITY_DN144_c1_g2/TRINITY_DN144_c1_g1/TRINITY_DN12319_c0_g1/TRINITY_DN14988_c0_g1/TRINITY_DN2121_c1_g1/TRINITY_DN2121_c0_g1/TRINITY_DN997_c2_g1/TRINITY_DN85_c1_g1/TRINITY_DN5085_c0_g1<br>TRINITY_DN13060_c0_g1/TRINITY_DN28846_c0_g1/TRINITY_DN8012_c1_g1/TRINITY_DN8676_c0_g1/TRINITY_DN16966_c0_g2/TRINITY_DN11245_c0_g1/TRINITY_DN28353_c0_g1/TRINITY_DN10924_c0_g1 | 6  |
| GO:0007029 | endoplasmic reticulum organization            | 14/1853 | 66/22442 | 0.000842 | 0.033322 | 0.03139  | TRINITY_DN144_c1_g1/TRINITY_DN12319_c0_g1/TRINITY_DN14988_c0_g1/TRINITY_DN2121_c1_g1/TRINITY_DN2121_c0_g1/TRINITY_DN997_c2_g1/TRINITY_DN85_c1_g1/TRINITY_DN5085_c0_g1<br>TRINITY_DN13060_c0_g1/TRINITY_DN28846_c0_g1/TRINITY_DN8012_c1_g1/TRINITY_DN8676_c0_g1/TRINITY_DN16966_c0_g2/TRINITY_DN11245_c0_g1/TRINITY_DN28353_c0_g1/TRINITY_DN10924_c0_g1                                                                                                                                                                                                                                                                                                                                               | 14 |
| GO:0097546 | ciliary base                                  | 8/1853  | 26/22442 | 0.000859 | 0.033556 | 0.03161  | TRINITY_DN8676_c0_g1/TRINITY_DN16966_c0_g2/TRINITY_DN11245_c0_g1/TRINITY_DN28353_c0_g1/TRINITY_DN10924_c0_g1                                                                                                                                                                                                                                                                                                                                                                                                                                                                                                                                                                                         | 8  |
| GO:0097228 | sperm principal piece                         | 7/1853  | 21/22442 | 0.001067 | 0.041141 | 0.038755 | TRINITY_DN6620_c0_g1/TRINITY_DN1579_c0_g1/TRINITY_DN6620_c0_g1/TRINITY_DN1579_c0_g1                                                                                                                                                                                                                                                                                                                                                                                                                                                                                                                                                                                                                  | 7  |

|            |                                                                |        |          |          |          |          |                                                                                                                                                                                                                                                                                         |   |
|------------|----------------------------------------------------------------|--------|----------|----------|----------|----------|-----------------------------------------------------------------------------------------------------------------------------------------------------------------------------------------------------------------------------------------------------------------------------------------|---|
| GO:0035002 | liquid clearance, open tracheal system                         | 8/1853 | 27/22442 | 0.001133 | 0.041816 | 0.039391 | Y_DN20426_c0_g1/TRINITY_DN15340_c0_g2/TRINITY_DN26604_c0_g1/TRINITY_DN12487_c0_g1/TRINITY_DN5700_c0_g1<br>TRINITY_DN10817_c0_g1/TRINITY_DN6954_c0_g1/TRINITY_DN19122_c0_g1/TRINITY_DN32057_c0_g1/TRINITY_DN14671_c0_g1/TRINITY_DN18560_c0_g1/TRINITY_DN1490_c0_g1/TRINITY_DN30995_c0_g2 | 8 |
| GO:0048691 | positive regulation of axon extension involved in regeneration | 8/1853 | 27/22442 | 0.001133 | 0.041816 | 0.039391 | TRINITY_DN144_c0_g1/TRINITY_DN4163_c0_g1/TRINITY_DN144_c1_g1/TRINITY_DN2121_c1_g1/TRINITY_DN6686_c0_g2/TRINITY_DN2121_c0_g1/TRINITY_DN882_c0_g1/TRINITY_DN16980_c0_g1                                                                                                                   | 8 |
| GO:0032561 | guanyl ribonucleotide binding                                  | 5/1853 | 11/22442 | 0.001154 | 0.041816 | 0.039391 | TRINITY_DN144_c0_g1/TRINITY_DN4163_c0_g1/TRINITY_DN144_c1_g1/TRINITY_DN2121_c1_g1/TRINITY_DN2121_c0_g1                                                                                                                                                                                  | 5 |
| GO:0042834 | peptidoglycan binding                                          | 5/1853 | 11/22442 | 0.001154 | 0.041816 | 0.039391 | TRINITY_DN9869_c0_g1/TRINITY_DN671_c2_g1/TRINITY_DN16122_c0_g1/TRINITY_DN10138_c0_g1/TRINITY_DN3630_c1_g1                                                                                                                                                                               | 5 |
| GO:0050707 | regulation of cytokine secretion                               | 5/1853 | 11/22442 | 0.001154 | 0.041816 | 0.039391 | TRINITY_DN7701_c0_g1/TRINITY_DN10572_c0_g1/TRINI                                                                                                                                                                                                                                        | 5 |

|            |                                            |         |          |          |          |          |                                                                                                                                                                                                                                                                                                                                                                                                                                                                                                                                                                                                                                                                                                                                                                                |    |
|------------|--------------------------------------------|---------|----------|----------|----------|----------|--------------------------------------------------------------------------------------------------------------------------------------------------------------------------------------------------------------------------------------------------------------------------------------------------------------------------------------------------------------------------------------------------------------------------------------------------------------------------------------------------------------------------------------------------------------------------------------------------------------------------------------------------------------------------------------------------------------------------------------------------------------------------------|----|
| GO:0031114 | regulation of microtubule depolymerization | 6/1853  | 16/22442 | 0.001218 | 0.043613 | 0.041084 | TY_DN19631_c0_g1/TRINITY_DN10572_c0_g2/TRINITY_DN8944_c0_g1<br>TRINITY_DN144_c0_g1/TRINITY_DN4163_c0_g1/TRINITY_DN144_c1_g1/TRINITY_DN6005_c0_g1/TRINITY_DN2121_c1_g1/TRINITY_DN2121_c0_g1<br>TRINITY_DN7175_c0_g1/TRINITY_DN5141_c0_g1/TRINITY_DN10099_c0_g1/TRINITY_DN20426_c0_g1/TRINITY_DN13060_c0_g1/TRINITY_DN28846_c0_g1/TRINITY_DN16994_c0_g1/TRINITY_DN14923_c0_g1/TRINITY_DN21874_c0_g1/TRINITY_DN22278_c0_g1/TRINITY_DN23267_c0_g1<br>TRINITY_DN6620_c0_g1/TRINITY_DN6235_c0_g1/TRINITY_DN16194_c0_g1/TRINITY_DN1579_c0_g1/TRINITY_DN3572_c0_g1/TRINITY_DN7221_c0_g2/TRINITY_DN18257_c0_g1/TRINITY_DN15340_c0_g2/TRINITY_DN6620_c0_g2/TRINITY_DN2566_c4_g1/TRINITY_DN32303_c0_g1/TRINITY_DN19322_c0_g1/TRINITY_DN26604_c0_g1/TRINITY_DN47966_c0_g1/TRINITY_DN5659_c | 6  |
| GO:0001669 | acrosomal vesicle                          | 11/1853 | 47/22442 | 0.001271 | 0.044949 | 0.042342 |                                                                                                                                                                                                                                                                                                                                                                                                                                                                                                                                                                                                                                                                                                                                                                                | 11 |
| GO:0036158 | outer dynein arm assembly                  | 17/1853 | 92/22442 | 0.001296 | 0.045306 | 0.042679 |                                                                                                                                                                                                                                                                                                                                                                                                                                                                                                                                                                                                                                                                                                                                                                                | 17 |

---

**Table S4.** Gene Ontology terms enriched in E-vs-F group.

| ID         | Description                       | GeneRatio | BgRatio   | <i>p</i> Value         | <i>p</i> Adjust        | <i>q</i> Value         | geneID                                                                                                                                                                                                                                                                                                                                                                                                                                                                                                                                                                                                                                                        | Count |
|------------|-----------------------------------|-----------|-----------|------------------------|------------------------|------------------------|---------------------------------------------------------------------------------------------------------------------------------------------------------------------------------------------------------------------------------------------------------------------------------------------------------------------------------------------------------------------------------------------------------------------------------------------------------------------------------------------------------------------------------------------------------------------------------------------------------------------------------------------------------------|-------|
| GO:0042302 | structural constituent of cuticle | 68/2626   | 180/33142 | $3.39 \times 10^{-29}$ | $9.58 \times 10^{-26}$ | $7.17 \times 10^{-26}$ | TRINITY_DN2795_c0_g2/TRINITY_DN5184_c1_g1/TRINITY_DN20596_c0_g1/TRINITY_DN7961_c0_g2/TRINITY_DN161_c0_g1/TRINITY_DN6070_c0_g1/TRINITY_DN24_c0_g1/TRINITY_DN5377_c0_g1/TRINITY_DN17428_c0_g1/TRINITY_DN7961_c0_g1/TRINITY_DN915_c0_g2/TRINITY_DN15986_c0_g1/TRINITY_DN9066_c0_g1/TRINITY_DN2870_c0_g1/TRINITY_DN14862_c0_g1/TRINITY_DN10047_c0_g1/TRINITY_DN17634_c0_g1/TRINITY_DN6262_c0_g1/TRINITY_DN9469_c0_g1/TRINITY_DN13386_c0_g1/TRINITY_DN15722_c0_g1/TRINITY_DN1933_c0_g1/TRINITY_DN4167_c1_g1/TRINITY_DN6963_c0_g1/TRINITY_DN38125_c0_g1/TRINITY_DN82200_c0_g1/TRINITY_DN75996_c0_g1/TRINITY_DN2659_c0_g1/TRINITY_DN433_c0_g1/TRINITY_DN13177_c0_g2/ | 68    |

TRINITY\_DN13904\_c0\_g1/TRI  
NITY\_DN3714\_c5\_g1/TRINIT  
Y\_DN5509\_c0\_g1/TRINITY\_D  
N364\_c1\_g1/TRINITY\_DN257  
43\_c0\_g1/TRINITY\_DN25954\_  
c0\_g1/TRINITY\_DN35961\_c0\_  
g1/TRINITY\_DN32176\_c0\_g1/  
TRINITY\_DN74542\_c0\_g1/TRI  
NITY\_DN22706\_c0\_g1/TRINI  
TY\_DN7380\_c0\_g1/TRINITY\_  
DN77377\_c0\_g1/TRINITY\_DN  
5920\_c0\_g1/TRINITY\_DN8961  
\_c0\_g2/TRINITY\_DN8307\_c0\_  
g2/TRINITY\_DN30143\_c0\_g1/  
TRINITY\_DN10158\_c0\_g1/TRI  
NITY\_DN8961\_c0\_g1/TRINIT  
Y\_DN3484\_c0\_g2/TRINITY\_D  
N7367\_c0\_g1/TRINITY\_DN22  
725\_c0\_g1/TRINITY\_DN62780  
\_c0\_g1/TRINITY\_DN19318\_c0  
\_g1/TRINITY\_DN915\_c0\_g1/T  
RINITY\_DN4613\_c0\_g1/TRIN  
ITY\_DN4642\_c0\_g1/TRINITY\_  
DN21556\_c0\_g1/TRINITY\_DN  
46633\_c0\_g1/TRINITY\_DN838  
\_c0\_g1/TRINITY\_DN15897\_c0  
\_g1/TRINITY\_DN45404\_c0\_g1  
/TRINITY\_DN6480\_c0\_g1/TRI  
NITY\_DN27704\_c0\_g1/TRINI  
TY\_DN9091\_c3\_g1/TRINITY\_  
DN35961\_c2\_g1/TRINITY\_DN  
75869\_c0\_g1/TRINITY\_DN303

|            |               |         |          |                             |                             |                             |                                                                                                                                                                                                                                                                                                                                                                                                                                                                                                                                                                                                                                                                                                                                                                                                |    |
|------------|---------------|---------|----------|-----------------------------|-----------------------------|-----------------------------|------------------------------------------------------------------------------------------------------------------------------------------------------------------------------------------------------------------------------------------------------------------------------------------------------------------------------------------------------------------------------------------------------------------------------------------------------------------------------------------------------------------------------------------------------------------------------------------------------------------------------------------------------------------------------------------------------------------------------------------------------------------------------------------------|----|
| GO:0031514 | motile cilium | 46/2626 | 86/33142 | 3.51 ×<br>10 <sup>-28</sup> | 4.95 ×<br>10 <sup>-25</sup> | 3.71 ×<br>10 <sup>-25</sup> | 21_c0_g1/TRINITY_DN15736_c0_g1<br>TRINITY_DN6657_c0_g1/TRINITY_DN2841_c0_g1/TRINITY_DN7740_c0_g1/TRINITY_DN3375_c0_g1/TRINITY_DN52_c0_g1/TRINITY_DN15863_c0_g1/TRINITY_DN4544_c0_g1/TRINITY_DN2729_c0_g1/TRINITY_DN9451_c0_g1/TRINITY_DN7530_c0_g1/TRINITY_DN13410_c0_g1/TRINITY_DN9269_c0_g1/TRINITY_DN6323_c1_g1/TRINITY_DN25521_c0_g1/TRINITY_DN3077_c2_g1/TRINITY_DN11340_c0_g1/TRINITY_DN25774_c0_g1/TRINITY_DN36928_c0_g1/TRINITY_DN38928_c0_g2/TRINITY_DN10076_c0_g1/TRINITY_DN195_c0_g1/TRINITY_DN1909_c0_g1/TRINITY_DN6380_c0_g1/TRINITY_DN12344_c0_g1/TRINITY_DN3767_c0_g1/TRINITY_DN10356_c0_g1/TRINITY_DN306_c1_g2/TRINITY_DN7652_c0_g1/TRINITY_DN3665_c0_g1/TRINITY_DN8675_c0_g2/TRINITY_DN9168_c0_g2/TRINITY_DN10366_c0_g1/TRINITY_DN10133_c0_g1/TRINITY_DN16784_c0_g1/TRINITY_D | 46 |
|------------|---------------|---------|----------|-----------------------------|-----------------------------|-----------------------------|------------------------------------------------------------------------------------------------------------------------------------------------------------------------------------------------------------------------------------------------------------------------------------------------------------------------------------------------------------------------------------------------------------------------------------------------------------------------------------------------------------------------------------------------------------------------------------------------------------------------------------------------------------------------------------------------------------------------------------------------------------------------------------------------|----|



|            |        |         |           |                             |                             |                             |                                                                                                                                                                                                                                                                                                                                                                                                                                                                                                                                                                                                                                                                                                                                                                                                             |    |
|------------|--------|---------|-----------|-----------------------------|-----------------------------|-----------------------------|-------------------------------------------------------------------------------------------------------------------------------------------------------------------------------------------------------------------------------------------------------------------------------------------------------------------------------------------------------------------------------------------------------------------------------------------------------------------------------------------------------------------------------------------------------------------------------------------------------------------------------------------------------------------------------------------------------------------------------------------------------------------------------------------------------------|----|
| GO:0005929 | cilium | 53/2626 | 120/33142 | 5.67 ×<br>10 <sup>-27</sup> | 5.34 ×<br>10 <sup>-24</sup> | 4.00 ×<br>10 <sup>-24</sup> | <p>N4533_c4_g1/TRINITY_DN35591_c0_g1/TRINITY_DN5840_c0_g1/TRINITY_DN30782_c0_g2/TRINITY_DN28131_c0_g1/TRINITY_DN59259_c0_g1/TRINITY_DN15794_c0_g1/TRINITY_DN29956_c0_g1/TRINITY_DN3427_c0_g1/TRINITY_DN5578_c0_g1/TRINITY_DN8113_c0_g2/TRINITY_DN63431_c0_g1</p> <p>TRINITY_DN6657_c0_g1/TRINITY_DN17778_c0_g1/TRINITY_DN11509_c0_g1/TRINITY_DN6327_c1_g1/TRINITY_DN7196_c0_g1/TRINITY_DN9996_c0_g1/TRINITY_DN7740_c0_g1/TRINITY_DN5006_c0_g2/TRINITY_DN5849_c0_g2/TRINITY_DN30087_c1_g2/TRINITY_DN4774_c0_g1/TRINITY_DN14031_c0_g1/TRINITY_DN13313_c0_g1/TRINITY_DN3071_c0_g1/TRINITY_DN954_c0_g1/TRINITY_DN20653_c0_g1/TRINITY_DN9720_c0_g1/TRINITY_DN36172_c0_g1/TRINITY_DN4043_c0_g1/TRINITY_DN19269_c0_g1/TRINITY_DN1979_c0_g1/TRINITY_DN4002_c0_g3/TRINITY_DN9930_c0_g2/TRINITY_DN3762_c0_g1/TRIN</p> | 53 |
|------------|--------|---------|-----------|-----------------------------|-----------------------------|-----------------------------|-------------------------------------------------------------------------------------------------------------------------------------------------------------------------------------------------------------------------------------------------------------------------------------------------------------------------------------------------------------------------------------------------------------------------------------------------------------------------------------------------------------------------------------------------------------------------------------------------------------------------------------------------------------------------------------------------------------------------------------------------------------------------------------------------------------|----|

|            |               |         |           |                        |                        |                        |                                                                                                                                                                                                                                                                                                                                                                                                                                                                                                                                                                                                                                                                                                                                                                                                                    |    |
|------------|---------------|---------|-----------|------------------------|------------------------|------------------------|--------------------------------------------------------------------------------------------------------------------------------------------------------------------------------------------------------------------------------------------------------------------------------------------------------------------------------------------------------------------------------------------------------------------------------------------------------------------------------------------------------------------------------------------------------------------------------------------------------------------------------------------------------------------------------------------------------------------------------------------------------------------------------------------------------------------|----|
| GO:0030054 | cell junction | 81/2626 | 310/33142 | $3.01 \times 10^{-22}$ | $2.12 \times 10^{-19}$ | $1.59 \times 10^{-19}$ | ITY_DN11340_c0_g1/TRINITY_DN16331_c0_g1/TRINITY_DN7145_c0_g1/TRINITY_DN13406_c0_g1/TRINITY_DN3083_c0_g1/TRINITY_DN7131_c0_g1/TRINITY_DN2415_c2_g1/TRINITY_DN4208_c0_g1/TRINITY_DN5875_c0_g1/TRINITY_DN20653_c0_g4/TRINITY_DN306_c1_g2/TRINITY_DN2153_c0_g1/TRINITY_DN6081_c1_g2/TRINITY_DN11027_c0_g1/TRINITY_DN489_c2_g1/TRINITY_DN3665_c0_g1/TRINITY_DN5968_c0_g1/TRINITY_DN6839_c2_g1/TRINITY_DN9168_c0_g2/TRINITY_DN14798_c0_g1/TRINITY_DN10366_c0_g1/TRINITY_DN7277_c2_g1/TRINITY_DN12092_c0_g3/TRINITY_DN4002_c0_g1/TRINITY_DN6282_c0_g1/TRINITY_DN59259_c0_g1/TRINITY_DN20653_c0_g2/TRINITY_DN26727_c0_g1/TRINITY_DN13780_c0_g1/TRINITY_DN5310_c0_g2/TRINITY_DN21399_c0_g2/TRINITY_DN9170_c1_g1/TRINITY_DN4032_c0_g1/TRINITY_DN32305_c0_g1/TRINITY_DN7371_c0_g1/TRINITY_DN6305_c1_g1/TRINITY_DN2489_c0_g1/T | 81 |
|------------|---------------|---------|-----------|------------------------|------------------------|------------------------|--------------------------------------------------------------------------------------------------------------------------------------------------------------------------------------------------------------------------------------------------------------------------------------------------------------------------------------------------------------------------------------------------------------------------------------------------------------------------------------------------------------------------------------------------------------------------------------------------------------------------------------------------------------------------------------------------------------------------------------------------------------------------------------------------------------------|----|

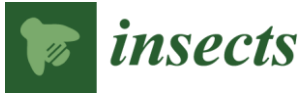

RINITY\_DN11936\_c0\_g1/TRI  
NITY\_DN13673\_c0\_g1/TRINI  
TY\_DN9219\_c0\_g1/TRINITY\_  
DN2738\_c0\_g1/TRINITY\_DN1  
120\_c0\_g2/TRINITY\_DN28373  
\_c0\_g1/TRINITY\_DN9375\_c0\_  
\_g1/TRINITY\_DN8217\_c0\_g1/T  
RINITY\_DN5859\_c0\_g1/TRIN  
ITY\_DN7277\_c1\_g1/TRINITY\_  
DN27259\_c0\_g1/TRINITY\_DN  
7737\_c0\_g1/TRINITY\_DN8355  
\_c0\_g1/TRINITY\_DN2161\_c0\_  
\_g1/TRINITY\_DN2207\_c0\_g1/T  
RINITY\_DN4958\_c0\_g1/TRIN  
ITY\_DN1316\_c0\_g1/TRINITY\_  
DN1482\_c0\_g1/TRINITY\_DN4  
477\_c0\_g1/TRINITY\_DN2415\_  
\_c2\_g1/TRINITY\_DN740\_c0\_g1  
/TRINITY\_DN15308\_c0\_g2/TR  
INITY\_DN3363\_c0\_g1/TRINIT  
Y\_DN2598\_c0\_g2/TRINITY\_D  
N11938\_c0\_g1/TRINITY\_DN1  
765\_c2\_g1/TRINITY\_DN1420\_  
\_c0\_g1/TRINITY\_DN2868\_c0\_g  
1/TRINITY\_DN10018\_c0\_g1/T  
RINITY\_DN3816\_c0\_g1/TRIN  
ITY\_DN1614\_c0\_g1/TRINITY\_  
DN19635\_c0\_g1/TRINITY\_DN  
25715\_c0\_g1/TRINITY\_DN821  
7\_c1\_g1/TRINITY\_DN3554\_c0  
\_g1/TRINITY\_DN4620\_c0\_g1/  
TRINITY\_DN7045\_c1\_g1/TRI

NITY\_DN84830\_c0\_g1/TRINI  
TY\_DN35269\_c0\_g1/TRINITY  
\_DN19224\_c0\_g1/TRINITY\_D  
N13011\_c0\_g1/TRINITY\_DN7  
054\_c0\_g1/TRINITY\_DN9935\_  
c1\_g1/TRINITY\_DN6093\_c0\_g  
2/TRINITY\_DN9041\_c0\_g1/TR  
INITY\_DN2120\_c1\_g1/TRINIT  
Y\_DN10575\_c2\_g1/TRINITY\_  
DN2746\_c0\_g1/TRINITY\_DN2  
165\_c3\_g1/TRINITY\_DN1800\_  
c0\_g1/TRINITY\_DN12127\_c0\_  
g1/TRINITY\_DN898\_c0\_g1/TR  
INITY\_DN10400\_c0\_g1/TRINI  
TY\_DN1482\_c0\_g2/TRINITY\_  
DN2938\_c3\_g1/TRINITY\_DN1  
5420\_c0\_g1/TRINITY\_DN1742  
2\_c0\_g2/TRINITY\_DN7687\_c0  
\_g1/TRINITY\_DN7200\_c0\_g2/  
TRINITY\_DN273\_c1\_g1/TRIN  
ITY\_DN8569\_c0\_g1/TRINITY\_  
DN7523\_c0\_g1/TRINITY\_DN9  
041\_c0\_g2/TRINITY\_DN12650  
\_c0\_g1/TRINITY\_DN428\_c0\_g  
1/TRINITY\_DN4000\_c0\_g2/TR  
INITY\_DN7084\_c0\_g1/TRINIT  
Y\_DN1908\_c0\_g1/TRINITY\_D  
N13354\_c0\_g1/TRINITY\_DN4  
674\_c0\_g1/TRINITY\_DN1133\_  
c1\_g2/TRINITY\_DN21399\_c0\_  
g1/TRINITY\_DN18471\_c0\_g2

|            |                 |         |           |                             |                             |                             |                                                                                                                                                                                                                                                                                                                                                                                                                                                                                                                                                                                                                                                                                                                                                                                                 |    |
|------------|-----------------|---------|-----------|-----------------------------|-----------------------------|-----------------------------|-------------------------------------------------------------------------------------------------------------------------------------------------------------------------------------------------------------------------------------------------------------------------------------------------------------------------------------------------------------------------------------------------------------------------------------------------------------------------------------------------------------------------------------------------------------------------------------------------------------------------------------------------------------------------------------------------------------------------------------------------------------------------------------------------|----|
| GO:0060271 | cilium assembly | 44/2626 | 112/33142 | 3.48 ×<br>10 <sup>-20</sup> | 1.97 ×<br>10 <sup>-17</sup> | 1.47 ×<br>10 <sup>-17</sup> | <p>TRINITY_DN6657_c0_g1/TRINITY_DN11509_c0_g1/TRINITY_DN15240_c0_g1/TRINITY_DN19725_c0_g1/TRINITY_DN11686_c1_g1/TRINITY_DN2051_c0_g1/TRINITY_DN3375_c0_g1/TRINITY_DN5006_c0_g2/TRINITY_DN11896_c0_g2/TRINITY_DN9451_c0_g1/TRINITY_DN42941_c0_g1/TRINITY_DN406_c0_g3/TRINITY_DN5049_c0_g1/TRINITY_DN21912_c0_g1/TRINITY_DN19269_c0_g1/TRINITY_DN2999_c0_g1/TRINITY_DN9930_c0_g2/TRINITY_DN3762_c0_g1/TRINITY_DN11340_c0_g1/TRINITY_DN16331_c0_g1/TRINITY_DN13406_c0_g1/TRINITY_DN4988_c2_g1/TRINITY_DN5875_c0_g1/TRINITY_DN18134_c0_g1/TRINITY_DN2725_c0_g1/TRINITY_DN306_c1_g2/TRINITY_DN2153_c0_g1/TRINITY_DN406_c0_g2/TRINITY_DN5914_c0_g1/TRINITY_DN130_c0_g1/TRINITY_DN15988_c0_g2/TRINITY_DN5968_c0_g1/TRINITY_DN4554_c0_g1/TRINITY_DN9168_c0_g2/TRINITY_DN10366_c0_g1/TRINITY_DN2281_</p> | 44 |
|------------|-----------------|---------|-----------|-----------------------------|-----------------------------|-----------------------------|-------------------------------------------------------------------------------------------------------------------------------------------------------------------------------------------------------------------------------------------------------------------------------------------------------------------------------------------------------------------------------------------------------------------------------------------------------------------------------------------------------------------------------------------------------------------------------------------------------------------------------------------------------------------------------------------------------------------------------------------------------------------------------------------------|----|





c0\_g2/TRINITY\_DN12260\_c0\_g1/TRINITY\_DN11048\_c0\_g1/TRINITY\_DN23953\_c0\_g1/TRINITY\_DN6641\_c1\_g1/TRINITY\_DN31763\_c0\_g1/TRINITY\_DN19263\_c1\_g1/TRINITY\_DN8177\_c0\_g1/TRINITY\_DN3312\_c0\_g1/TRINITY\_DN30190\_c0\_g1/TRINITY\_DN32456\_c0\_g2/TRINITY\_DN8587\_c0\_g1/TRINITY\_DN6108\_c3\_g1/TRINITY\_DN19398\_c0\_g2/TRINITY\_DN14570\_c0\_g1/TRINITY\_DN18051\_c0\_g1/TRINITY\_DN10159\_c1\_g1/TRINITY\_DN45371\_c0\_g1/TRINITY\_DN9755\_c0\_g1/TRINITY\_DN15112\_c0\_g1/TRINITY\_DN14429\_c0\_g1/TRINITY\_DN6641\_c0\_g2/TRINITY\_DN7955\_c1\_g1/TRINITY\_DN39494\_c0\_g1/TRINITY\_DN7608\_c0\_g1/TRINITY\_DN1818\_c2\_g1/TRINITY\_DN2734\_c0\_g1/TRINITY\_DN5682\_c0\_g1/TRINITY\_DN800\_c0\_g2/TRINITY\_DN9798\_c0\_g1/TRINITY\_DN9626\_c0\_g2/TRINITY\_DN6641\_c0\_g1/TRINITY\_DN76414\_c0\_g1/TRINITY\_DN9853\_c0\_g1/TRINITY\_DN20525\_c0\_g1/TRINITY\_DN7570\_c0\_g1/TRINITY\_DN7189\_c1\_g1/TRINITY\_

GO:0005930

axoneme

30/2626

69/33142

1.16 ×  
10<sup>-15</sup>

4.70 ×  
10<sup>-13</sup>

3.52 ×  
10<sup>-13</sup>

DN45562\_c0\_g1/TRINITY\_DN  
32069\_c0\_g1/TRINITY\_DN468  
94\_c1\_g1/TRINITY\_DN13768\_  
c0\_g1/TRINITY\_DN9924\_c0\_g  
1/TRINITY\_DN10573\_c0\_g1/T  
RINITY\_DN1216\_c0\_g1/TRIN  
ITY\_DN22425\_c0\_g1/TRINITY  
\_DN5802\_c0\_g1/TRINITY\_DN  
1480\_c0\_g2/TRINITY\_DN138\_  
c1\_g1/TRINITY\_DN2961\_c0\_g  
1/TRINITY\_DN40263\_c0\_g1/T  
RINITY\_DN19327\_c1\_g1  
TRINITY\_DN11509\_c0\_g1/TRI  
NITY\_DN6327\_c1\_g1/TRINIT  
Y\_DN15240\_c0\_g1/TRINITY\_  
DN7740\_c0\_g1/TRINITY\_DN2  
752\_c0\_g1/TRINITY\_DN9451\_  
c0\_g1/TRINITY\_DN1979\_c0\_g  
2/TRINITY\_DN4043\_c0\_g1/TR  
INITY\_DN3077\_c2\_g1/TRINIT  
Y\_DN25774\_c0\_g1/TRINITY\_  
DN12886\_c0\_g1/TRINITY\_DN  
7131\_c0\_g1/TRINITY\_DN1007  
6\_c0\_g1/TRINITY\_DN9195\_c0  
\_g1/TRINITY\_DN18134\_c0\_g1  
/TRINITY\_DN15113\_c0\_g1/TR  
INITY\_DN12344\_c0\_g1/TRINI  
TY\_DN306\_c1\_g2/TRINITY\_D  
N5914\_c0\_g1/TRINITY\_DN59  
68\_c0\_g1/TRINITY\_DN8872\_c  
0\_g1/TRINITY\_DN10133\_c0\_g  
1/TRINITY\_DN16784\_c0\_g1/T

30



|            |             |         |           |                             |                             |                             |                                                                                                                                                                                                                                                                                                                                                                                                                                                                                                                                                                                                                                                                                                                                                                                                                    |    |
|------------|-------------|---------|-----------|-----------------------------|-----------------------------|-----------------------------|--------------------------------------------------------------------------------------------------------------------------------------------------------------------------------------------------------------------------------------------------------------------------------------------------------------------------------------------------------------------------------------------------------------------------------------------------------------------------------------------------------------------------------------------------------------------------------------------------------------------------------------------------------------------------------------------------------------------------------------------------------------------------------------------------------------------|----|
| GO:0005874 | microtubule | 76/2626 | 361/33142 | 2.89 ×<br>10 <sup>-15</sup> | 1.02 ×<br>10 <sup>-12</sup> | 7.64 ×<br>10 <sup>-13</sup> | <p>RINITY_DN5840_c0_g1/TRINITY_DN9647_c0_g1/TRINITY_DN28131_c0_g1/TRINITY_DN59259_c0_g1/TRINITY_DN3427_c0_g1/TRINITY_DN13780_c0_g1/TRINITY_DN63431_c0_g1</p> <p>1</p> <p>TRINITY_DN3700_c0_g3/TRINITY_DN3245_c0_g1/TRINITY_DN19161_c0_g1/TRINITY_DN10881_c0_g1/TRINITY_DN19725_c0_g1/TRINITY_DN9561_c0_g1/TRINITY_DN7740_c0_g1/TRINITY_DN4223_c1_g1/TRINITY_DN12450_c0_g2/TRINITY_DN456_c0_g1/TRINITY_DN9451_c0_g1/TRINITY_DN16186_c0_g1/TRINITY_DN5849_c0_g2/TRINITY_DN1979_c0_g2/TRINITY_DN16674_c1_g3/TRINITY_DN2588_c0_g1/TRINITY_DN13313_c0_g1/TRINITY_DN6610_c0_g1/TRINITY_DN16674_c1_g2/TRINITY_DN1265_c0_g1/TRINITY_DN3090_c1_g1/TRINITY_DN4759_c0_g1/TRINITY_DN5173_c0_g1/TRINITY_DN5811_c0_g1/TRINITY_DN552_c0_g1/TRINITY_DN1979_c0_g1/TRINITY_DN4543_c0_g2/TRINITY_DN233_c0_g1/TRINITY_DN3083_c0_g1</p> | 76 |
|------------|-------------|---------|-----------|-----------------------------|-----------------------------|-----------------------------|--------------------------------------------------------------------------------------------------------------------------------------------------------------------------------------------------------------------------------------------------------------------------------------------------------------------------------------------------------------------------------------------------------------------------------------------------------------------------------------------------------------------------------------------------------------------------------------------------------------------------------------------------------------------------------------------------------------------------------------------------------------------------------------------------------------------|----|

/TRINITY\_DN12886\_c0\_g1/TRINITY\_DN1979\_c1\_g1/TRINITY\_DN2415\_c2\_g1/TRINITY\_DN16168\_c0\_g1/TRINITY\_DN4208\_c0\_g1/TRINITY\_DN3597\_c0\_g2/TRINITY\_DN18134\_c0\_g1/TRINITY\_DN1909\_c0\_g1/TRINITY\_DN2725\_c0\_g1/TRINITY\_DN4474\_c0\_g1/TRINITY\_DN3767\_c0\_g1/TRINITY\_DN10356\_c0\_g1/TRINITY\_DN15133\_c0\_g1/TRINITY\_DN489\_c2\_g1/TRINITY\_DN7652\_c0\_g1/TRINITY\_DN18791\_c0\_g1/TRINITY\_DN2372\_c0\_g1/TRINITY\_DN9716\_c0\_g1/TRINITY\_DN7469\_c2\_g1/TRINITY\_DN5968\_c0\_g1/TRINITY\_DN436\_c2\_g1/TRINITY\_DN953\_c0\_g1/TRINITY\_DN7691\_c1\_g1/TRINITY\_DN12133\_c0\_g1/TRINITY\_DN14798\_c0\_g1/TRINITY\_DN2869\_c2\_g1/TRINITY\_DN10366\_c0\_g1/TRINITY\_DN15544\_c0\_g1/TRINITY\_DN26007\_c0\_g2/TRINITY\_DN1107\_c1\_g1/TRINITY\_DN35591\_c0\_g1/TRINITY\_DN31689\_c0\_g1/TRINITY\_DN6282\_c0\_g1/TRINITY\_DN9647\_c0\_g1/TRINITY\_DN6818\_c0\_g2/TRINITY\_DN25627\_c0\_g1/TRINITY\_DN59259\_c0

|            |                                              |         |          |                        |                        |                        |                                                                                                                                                                                                                                                                                                                                                                                                                                                                                                                                                                                                                                                                                                                                                                                                                                                                                                                                            |    |
|------------|----------------------------------------------|---------|----------|------------------------|------------------------|------------------------|--------------------------------------------------------------------------------------------------------------------------------------------------------------------------------------------------------------------------------------------------------------------------------------------------------------------------------------------------------------------------------------------------------------------------------------------------------------------------------------------------------------------------------------------------------------------------------------------------------------------------------------------------------------------------------------------------------------------------------------------------------------------------------------------------------------------------------------------------------------------------------------------------------------------------------------------|----|
| GO:0004867 | serine-type endopeptidase inhibitor activity | 30/2626 | 72/33142 | $4.78 \times 10^{-15}$ | $1.50 \times 10^{-12}$ | $1.12 \times 10^{-12}$ | _g1/TRINITY_DN27115_c0_g1<br>/TRINITY_DN12005_c0_g1/TR<br>INITY_DN5922_c0_g1/TRINIT<br>Y_DN29956_c0_g1/TRINITY_<br>DN5578_c0_g1/TRINITY_DN1<br>3780_c0_g1/TRINITY_DN3949<br>1_c0_g1/TRINITY_DN15080_c<br>0_g1/TRINITY_DN3383_c0_g1<br>/TRINITY_DN18471_c0_g2<br>TRINITY_DN398_c0_g1/TRIN<br>ITY_DN7571_c0_g1/TRINITY_<br>DN20619_c0_g1/TRINITY_DN<br>5613_c1_g1/TRINITY_DN6082<br>_c1_g2/TRINITY_DN16500_c1<br>_g1/TRINITY_DN4861_c0_g1/<br>TRINITY_DN5323_c0_g1/TRI<br>NITY_DN3123_c0_g1/TRINIT<br>Y_DN2738_c0_g1/TRINITY_D<br>N1880_c2_g2/TRINITY_DN39<br>23_c0_g1/TRINITY_DN14227_<br>c0_g1/TRINITY_DN13407_c0_<br>g1/TRINITY_DN81482_c0_g2/<br>TRINITY_DN1880_c2_g1/TRI<br>NITY_DN24544_c0_g1/TRINI<br>TY_DN4603_c1_g1/TRINITY_<br>DN1510_c0_g1/TRINITY_DN2<br>9610_c0_g1/TRINITY_DN636_<br>c0_g1/TRINITY_DN1696_c0_g<br>3/TRINITY_DN44040_c0_g1/T<br>RINITY_DN18049_c0_g1/TRI<br>NITY_DN10648_c0_g1/TRINI<br>TY_DN3717_c0_g1/TRINITY_ | 30 |
|------------|----------------------------------------------|---------|----------|------------------------|------------------------|------------------------|--------------------------------------------------------------------------------------------------------------------------------------------------------------------------------------------------------------------------------------------------------------------------------------------------------------------------------------------------------------------------------------------------------------------------------------------------------------------------------------------------------------------------------------------------------------------------------------------------------------------------------------------------------------------------------------------------------------------------------------------------------------------------------------------------------------------------------------------------------------------------------------------------------------------------------------------|----|

|            |                                   |         |           |                        |                        |                        |                                                                                                                                                                                                                                                                                                                                                                                                                                                                                                                                                                                                                                                                                                                                                                                                                                                                                                   |    |
|------------|-----------------------------------|---------|-----------|------------------------|------------------------|------------------------|---------------------------------------------------------------------------------------------------------------------------------------------------------------------------------------------------------------------------------------------------------------------------------------------------------------------------------------------------------------------------------------------------------------------------------------------------------------------------------------------------------------------------------------------------------------------------------------------------------------------------------------------------------------------------------------------------------------------------------------------------------------------------------------------------------------------------------------------------------------------------------------------------|----|
| GO:0030992 | intraciliary transport particle B | 14/2626 | 16/33142  | $3.83 \times 10^{-14}$ | $1.08 \times 10^{-11}$ | $8.11 \times 10^{-12}$ | DN7326_c0_g1/TRINITY_DN5<br>6782_c0_g1/TRINITY_DN2075<br>4_c0_g1/TRINITY_DN14093_c<br>0_g1<br>TRINITY_DN11509_c0_g1/TRI<br>NITY_DN6327_c1_g1/TRINIT<br>Y_DN7196_c0_g1/TRINITY_D<br>N5006_c0_g2/TRINITY_DN19<br>269_c0_g1/TRINITY_DN4002_<br>c0_g3/TRINITY_DN9930_c0_g<br>2/TRINITY_DN11340_c0_g1/T<br>RINITY_DN7145_c0_g1/TRIN<br>ITY_DN13406_c0_g1/TRINITY<br>_DN306_c1_g2/TRINITY_DN2<br>153_c0_g1/TRINITY_DN9168_<br>c0_g2/TRINITY_DN4002_c0_g<br>1<br>TRINITY_DN21399_c0_g2/TRI<br>NITY_DN32305_c0_g1/TRINI<br>TY_DN7371_c0_g1/TRINITY_<br>DN3245_c0_g1/TRINITY_DN1<br>487_c0_g2/TRINITY_DN2489_<br>c0_g1/TRINITY_DN13673_c0_<br>g1/TRINITY_DN6174_c0_g1/T<br>RINITY_DN9219_c0_g1/TRIN<br>ITY_DN2738_c0_g1/TRINITY_<br>DN47_c0_g1/TRINITY_DN937<br>5_c0_g1/TRINITY_DN7277_c1<br>_g1/TRINITY_DN2207_c0_g1/<br>TRINITY_DN4958_c0_g1/TRI<br>NITY_DN10760_c0_g1/TRINI<br>TY_DN9333_c0_g1/TRINITY_ | 14 |
| GO:0045202 | synapse                           | 51/2626 | 204/33142 | $1.01 \times 10^{-13}$ | $2.60 \times 10^{-11}$ | $1.95 \times 10^{-11}$ |                                                                                                                                                                                                                                                                                                                                                                                                                                                                                                                                                                                                                                                                                                                                                                                                                                                                                                   | 51 |

|            |                                          |         |           |                        |                        |                        |                                                                                                                                                                                                                                                                                                                                                                                                                                                                                                                                                                                                                                                                                                                                                                                                   |    |
|------------|------------------------------------------|---------|-----------|------------------------|------------------------|------------------------|---------------------------------------------------------------------------------------------------------------------------------------------------------------------------------------------------------------------------------------------------------------------------------------------------------------------------------------------------------------------------------------------------------------------------------------------------------------------------------------------------------------------------------------------------------------------------------------------------------------------------------------------------------------------------------------------------------------------------------------------------------------------------------------------------|----|
| GO:0043231 | intracellular membrane-bounded organelle | 65/2626 | 316/33142 | $8.81 \times 10^{-13}$ | $2.07 \times 10^{-10}$ | $1.55 \times 10^{-10}$ | DN2415_c2_g1/TRINITY_DN740_c0_g1/TRINITY_DN15308_c0_g2/TRINITY_DN480_c0_g1/TRINITY_DN2598_c0_g2/TRINITY_DN1420_c0_g1/TRINITY_DN10018_c0_g1/TRINITY_DN3816_c0_g1/TRINITY_DN8217_c1_g1/TRINITY_DN3554_c0_g1/TRINITY_DN11154_c0_g1/TRINITY_DN19224_c0_g1/TRINITY_DN13011_c0_g1/TRINITY_DN2120_c1_g1/TRINITY_DN2746_c0_g1/TRINITY_DN19691_c1_g1/TRINITY_DN2938_c3_g1/TRINITY_DN55372_c0_g1/TRINITY_DN15420_c0_g1/TRINITY_DN17422_c0_g2/TRINITY_DN7687_c0_g1/TRINITY_DN5274_c0_g1/TRINITY_DN7200_c0_g2/TRINITY_DN11061_c0_g2/TRINITY_DN7523_c0_g1/TRINITY_DN44537_c0_g1/TRINITY_DN16058_c0_g1/TRINITY_DN52030_c0_g1/TRINITY_DN4000_c0_g2/TRINITY_DN7084_c0_g1/TRINITY_DN1908_c0_g1/TRINITY_DN2961_c0_g1/TRINITY_DN13354_c0_g1/TRINITY_DN1133_c1_g2<br>TRINITY_DN7814_c0_g2/TRINITY_DN32009_c0_g1/TRINI | 65 |
|------------|------------------------------------------|---------|-----------|------------------------|------------------------|------------------------|---------------------------------------------------------------------------------------------------------------------------------------------------------------------------------------------------------------------------------------------------------------------------------------------------------------------------------------------------------------------------------------------------------------------------------------------------------------------------------------------------------------------------------------------------------------------------------------------------------------------------------------------------------------------------------------------------------------------------------------------------------------------------------------------------|----|

TY\_DN16600\_c0\_g1/TRINITY  
\_DN7371\_c0\_g1/TRINITY\_DN  
72971\_c0\_g1/TRINITY\_DN645  
5\_c0\_g1/TRINITY\_DN8493\_c0  
\_g1/TRINITY\_DN2078\_c0\_g1/  
TRINITY\_DN43642\_c0\_g1/TRI  
NITY\_DN16979\_c0\_g1/TRINI  
TY\_DN77269\_c0\_g1/TRINITY  
\_DN11954\_c0\_g1/TRINITY\_D  
N5216\_c1\_g1/TRINITY\_DN28  
48\_c1\_g1/TRINITY\_DN5364\_c  
0\_g1/TRINITY\_DN7048\_c0\_g1  
/TRINITY\_DN5006\_c0\_g2/TRI  
NITY\_DN5086\_c0\_g1/TRINIT  
Y\_DN2476\_c1\_g1/TRINITY\_D  
N23485\_c0\_g1/TRINITY\_DN1  
6861\_c0\_g1/TRINITY\_DN2557  
\_c0\_g2/TRINITY\_DN27271\_c0  
\_g1/TRINITY\_DN23263\_c0\_g1  
/TRINITY\_DN13963\_c0\_g1/TR  
INITY\_DN15487\_c0\_g1/TRINI  
TY\_DN5170\_c0\_g1/TRINITY\_  
DN4826\_c1\_g1/TRINITY\_DN5  
087\_c0\_g1/TRINITY\_DN8718\_  
c0\_g1/TRINITY\_DN10011\_c0\_  
g1/TRINITY\_DN17565\_c0\_g1/  
TRINITY\_DN28084\_c0\_g1/TRI  
NITY\_DN4160\_c0\_g1/TRINIT  
Y\_DN10583\_c0\_g1/TRINITY\_  
DN9492\_c0\_g1/TRINITY\_DN3  
614\_c1\_g1/TRINITY\_DN271\_c  
0\_g1/TRINITY\_DN974\_c0\_g1/

|            |              |         |           |                             |                             |                             |                                                                                                                                                                                                                                                                                                                                                                                                                                                                                                                                                                                                                                                                                                                                                                                                      |    |
|------------|--------------|---------|-----------|-----------------------------|-----------------------------|-----------------------------|------------------------------------------------------------------------------------------------------------------------------------------------------------------------------------------------------------------------------------------------------------------------------------------------------------------------------------------------------------------------------------------------------------------------------------------------------------------------------------------------------------------------------------------------------------------------------------------------------------------------------------------------------------------------------------------------------------------------------------------------------------------------------------------------------|----|
| GO:0009986 | cell surface | 52/2626 | 227/33142 | 2.30 ×<br>10 <sup>-12</sup> | 4.89 ×<br>10 <sup>-10</sup> | 3.66 ×<br>10 <sup>-10</sup> | TRINITY_DN9492_c0_g2/TRINITY_DN2095_c0_g1/TRINITY_DN24147_c0_g1/TRINITY_DN7045_c1_g1/TRINITY_DN8284_c0_g1/TRINITY_DN656_c0_g1/TRINITY_DN9853_c0_g1/TRINITY_DN6603_c0_g1/TRINITY_DN20754_c0_g1/TRINITY_DN15324_c1_g1/TRINITY_DN13235_c0_g1/TRINITY_DN898_c0_g1/TRINITY_DN7713_c1_g1/TRINITY_DN13226_c0_g1/TRINITY_DN9897_c0_g1/TRINITY_DN1200_c2_g1/TRINITY_DN9937_c0_g1/TRINITY_DN2006_c1_g2/TRINITY_DN12650_c0_g1/TRINITY_DN901_c0_g1/TRINITY_DN11447_c0_g1/TRINITY_DN43641_c0_g1/TRINITY_DN333_c0_g1/TRINITY_DN6505_c0_g1/TRINITY_DN579_c0_g1/TRINITY_DN901_c0_g2<br>TRINITY_DN21789_c0_g1/TRINITY_DN5056_c0_g1/TRINITY_DN9277_c0_g1/TRINITY_DN2398_c2_g1/TRINITY_DN1949_c0_g1/TRINITY_DN22536_c0_g1/TRINITY_DN18454_c0_g1/TRINITY_DN9219_c0_g1/TRINITY_DN1568_c0_g1/TRINITY_DN2738_c0_g1/TRINITY_ | 52 |
|------------|--------------|---------|-----------|-----------------------------|-----------------------------|-----------------------------|------------------------------------------------------------------------------------------------------------------------------------------------------------------------------------------------------------------------------------------------------------------------------------------------------------------------------------------------------------------------------------------------------------------------------------------------------------------------------------------------------------------------------------------------------------------------------------------------------------------------------------------------------------------------------------------------------------------------------------------------------------------------------------------------------|----|



DN5364\_c0\_g1/TRINITY\_DN7  
048\_c0\_g1/TRINITY\_DN15486  
\_c0\_g2/TRINITY\_DN4514\_c0\_  
g1/TRINITY\_DN7743\_c0\_g1/T  
RINITY\_DN5086\_c0\_g1/TRIN  
ITY\_DN14877\_c1\_g1/TRINITY  
\_DN9375\_c0\_g1/TRINITY\_DN  
8257\_c0\_g1/TRINITY\_DN6108  
\_c0\_g1/TRINITY\_DN722\_c1\_g  
1/TRINITY\_DN740\_c0\_g1/TRI  
NITY\_DN15308\_c0\_g2/TRINI  
TY\_DN1902\_c0\_g1/TRINITY\_  
DN4441\_c3\_g1/TRINITY\_DN2  
598\_c0\_g2/TRINITY\_DN1614\_  
c0\_g1/TRINITY\_DN13726\_c0\_  
g1/TRINITY\_DN8278\_c2\_g1/T  
RINITY\_DN7045\_c1\_g1/TRIN  
ITY\_DN10569\_c0\_g2/TRINITY  
\_DN2292\_c2\_g1/TRINITY\_DN  
9780\_c0\_g1/TRINITY\_DN2075  
4\_c0\_g1/TRINITY\_DN19100\_c  
0\_g1/TRINITY\_DN77356\_c0\_g  
1/TRINITY\_DN9158\_c3\_g1/TR  
INITY\_DN26376\_c0\_g1/TRINI  
TY\_DN9521\_c0\_g1/TRINITY\_  
DN709\_c0\_g1/TRINITY\_DN76  
87\_c0\_g1/TRINITY\_DN5274\_c  
0\_g1/TRINITY\_DN3902\_c0\_g1  
/TRINITY\_DN273\_c1\_g1/TRI  
NITY\_DN23609\_c0\_g1/TRINI  
TY\_DN7523\_c0\_g1/TRINITY\_  
DN12958\_c0\_g1/TRINITY\_DN



|            |                                     |         |           |                        |                        |                        |                                                                                                                                                                                                                                                                                                                                                                                                                                                                                                                                                                                                                                                                                                                                                                                                              |    |
|------------|-------------------------------------|---------|-----------|------------------------|------------------------|------------------------|--------------------------------------------------------------------------------------------------------------------------------------------------------------------------------------------------------------------------------------------------------------------------------------------------------------------------------------------------------------------------------------------------------------------------------------------------------------------------------------------------------------------------------------------------------------------------------------------------------------------------------------------------------------------------------------------------------------------------------------------------------------------------------------------------------------|----|
| GO:0004930 | G protein-coupled receptor activity | 40/2626 | 147/33142 | $2.49 \times 10^{-12}$ | $4.89 \times 10^{-10}$ | $3.66 \times 10^{-10}$ | 1480_c0_g2/TRINITY_DN333_c0_g1/TRINITY_DN42475_c0_g1/TRINITY_DN13354_c0_g1/TRINITY_DN14134_c0_g1/TRINITY_DN2217_c0_g1/TRINITY_DN14379_c0_g1/TRINITY_DN2244_c1_g1/TRINITY_DN39639_c3_g1/TRINITY_DN938_c2_g1/TRINITY_DN7051_c0_g1/TRINITY_DN10577_c0_g1/TRINITY_DN36816_c0_g1/TRINITY_DN1709_c0_g1/TRINITY_DN17903_c0_g1/TRINITY_DN18021_c0_g2/TRINITY_DN41433_c0_g1/TRINITY_DN1451_c0_g2/TRINITY_DN19321_c0_g1/TRINITY_DN22381_c0_g1/TRINITY_DN2601_c0_g1/TRINITY_DN10201_c0_g1/TRINITY_DN1486_c0_g1/TRINITY_DN27368_c0_g1/TRINITY_DN1451_c0_g1/TRINITY_DN31435_c0_g1/TRINITY_DN43399_c0_g1/TRINITY_DN84830_c0_g1/TRINITY_DN33474_c0_g1/TRINITY_DN27045_c0_g1/TRINITY_DN9642_c1_g2/TRINITY_DN28222_c0_g1/TRINITY_DN58254_c0_g1/TRINITY_DN3032_c1_g2/TRINITY_DN446_c1_g1/TRINITY_DN874_c0_g1/TRINITY_DN3743_c1 | 40 |
|------------|-------------------------------------|---------|-----------|------------------------|------------------------|------------------------|--------------------------------------------------------------------------------------------------------------------------------------------------------------------------------------------------------------------------------------------------------------------------------------------------------------------------------------------------------------------------------------------------------------------------------------------------------------------------------------------------------------------------------------------------------------------------------------------------------------------------------------------------------------------------------------------------------------------------------------------------------------------------------------------------------------|----|

|            |                                              |         |           |                        |                        |                        |                                                                                                                                                                                                                                                                                                                                                                                                                                                                                                                                                                                                                                                                                                                                                                                                                                                                                                              |    |
|------------|----------------------------------------------|---------|-----------|------------------------|------------------------|------------------------|--------------------------------------------------------------------------------------------------------------------------------------------------------------------------------------------------------------------------------------------------------------------------------------------------------------------------------------------------------------------------------------------------------------------------------------------------------------------------------------------------------------------------------------------------------------------------------------------------------------------------------------------------------------------------------------------------------------------------------------------------------------------------------------------------------------------------------------------------------------------------------------------------------------|----|
| GO:0036126 | sperm flagellum                              | 19/2626 | 36/33142  | $2.60 \times 10^{-12}$ | $4.89 \times 10^{-10}$ | $3.66 \times 10^{-10}$ | _g1/TRINITY_DN11648_c0_g1<br>/TRINITY_DN1001_c0_g1/TRI<br>NITY_DN48880_c0_g1/TRINI<br>TY_DN58043_c0_g1/TRINITY<br>_DN15502_c0_g1/TRINITY_D<br>N2285_c0_g1/TRINITY_DN86<br>4_c0_g3/TRINITY_DN14134_c<br>0_g1<br>TRINITY_DN19725_c0_g1/TRI<br>NITY_DN11686_c1_g1/TRINI<br>TY_DN7740_c0_g1/TRINITY_<br>DN15863_c0_g1/TRINITY_DN<br>4544_c0_g1/TRINITY_DN1979<br>_c0_g2/TRINITY_DN6610_c0_<br>g1/TRINITY_DN36928_c0_g1/<br>TRINITY_DN6380_c0_g1/TRI<br>NITY_DN2725_c0_g1/TRINIT<br>Y_DN12344_c0_g1/TRINITY_<br>DN306_c1_g2/TRINITY_DN59<br>68_c0_g1/TRINITY_DN2331_c<br>0_g1/TRINITY_DN9168_c0_g2<br>/TRINITY_DN10366_c0_g1/TR<br>INITY_DN7067_c0_g1/TRINIT<br>Y_DN59259_c0_g1/TRINITY_<br>DN16662_c0_g1<br>TRINITY_DN72971_c0_g1/TRI<br>NITY_DN2217_c0_g1/TRINIT<br>Y_DN14379_c0_g1/TRINITY_<br>DN39639_c3_g1/TRINITY_DN<br>938_c2_g1/TRINITY_DN834_c<br>1_g1/TRINITY_DN7051_c0_g1<br>/TRINITY_DN10577_c0_g1/TR | 19 |
| GO:0007186 | G protein-coupled receptor signaling pathway | 46/2626 | 191/33142 | $6.61 \times 10^{-12}$ | $1.17 \times 10^{-9}$  | $8.73 \times 10^{-10}$ |                                                                                                                                                                                                                                                                                                                                                                                                                                                                                                                                                                                                                                                                                                                                                                                                                                                                                                              | 46 |



INITY\_DN36816\_c0\_g1/TRINI  
TY\_DN7048\_c0\_g1/TRINITY\_  
DN1709\_c0\_g1/TRINITY\_DN2  
0653\_c0\_g1/TRINITY\_DN1790  
3\_c0\_g1/TRINITY\_DN18021\_c  
0\_g2/TRINITY\_DN41433\_c0\_g  
1/TRINITY\_DN4826\_c1\_g1/TR  
INITY\_DN1229\_c2\_g1/TRINIT  
Y\_DN19321\_c0\_g1/TRINITY\_  
DN22381\_c0\_g1/TRINITY\_DN  
2601\_c0\_g1/TRINITY\_DN1020  
1\_c0\_g1/TRINITY\_DN1486\_c0  
\_g1/TRINITY\_DN27368\_c0\_g1  
/TRINITY\_DN31435\_c0\_g1/TR  
INITY\_DN84830\_c0\_g1/TRINI  
TY\_DN33474\_c0\_g1/TRINITY  
\_DN5120\_c0\_g1/TRINITY\_DN  
9642\_c1\_g2/TRINITY\_DN2822  
2\_c0\_g1/TRINITY\_DN6839\_c2  
\_g1/TRINITY\_DN58254\_c0\_g1  
/TRINITY\_DN6910\_c0\_g1/TRI  
NITY\_DN3032\_c1\_g2/TRINIT  
Y\_DN446\_c1\_g1/TRINITY\_D  
N874\_c0\_g1/TRINITY\_DN374  
3\_c1\_g1/TRINITY\_DN11648\_c  
0\_g1/TRINITY\_DN1001\_c0\_g1  
/TRINITY\_DN48880\_c0\_g1/TR  
INITY\_DN58043\_c0\_g1/TRINI  
TY\_DN12650\_c0\_g1/TRINITY  
\_DN15502\_c0\_g1/TRINITY\_D  
N10344\_c0\_g1/TRINITY\_DN2  
285\_c0\_g1/TRINITY\_DN864\_c

|            |                        |         |           |                        |                       |                        |                                                                                                                                                                                                                                                                                                                                                                                                                                                                                                                                                                                                                                                                                                                                                                                                 |    |
|------------|------------------------|---------|-----------|------------------------|-----------------------|------------------------|-------------------------------------------------------------------------------------------------------------------------------------------------------------------------------------------------------------------------------------------------------------------------------------------------------------------------------------------------------------------------------------------------------------------------------------------------------------------------------------------------------------------------------------------------------------------------------------------------------------------------------------------------------------------------------------------------------------------------------------------------------------------------------------------------|----|
| GO:0016324 | apical plasma membrane | 45/2626 | 185/33142 | $7.74 \times 10^{-12}$ | $1.29 \times 10^{-9}$ | $9.63 \times 10^{-10}$ | 0_g3/TRINITY_DN14134_c0_g1<br>TRINITY_DN7437_c0_g1/TRINITY_DN1748_c0_g1/TRINITY_DN1990_c0_g1/TRINITY_DN11631_c0_g3/TRINITY_DN47_c0_g1/TRINITY_DN4514_c0_g1/TRINITY_DN388_c0_g1/TRINITY_DN7743_c0_g1/TRINITY_DN14877_c1_g1/TRINITY_DN1709_c0_g1/TRINITY_DN7737_c0_g1/TRINITY_DN20881_c0_g2/TRINITY_DN3305_c0_g1/TRINITY_DN9333_c0_g1/TRINITY_DN480_c0_g1/TRINITY_DN1902_c0_g1/TRINITY_DN3363_c0_g1/TRINITY_DN1852_c2_g1/TRINITY_DN6810_c0_g1/TRINITY_DN1773_c1_g2/TRINITY_DN7880_c0_g1/TRINITY_DN7045_c1_g1/TRINITY_DN5795_c3_g1/TRINITY_DN6705_c0_g2/TRINITY_DN93_c0_g1/TRINITY_DN6365_c0_g1/TRINITY_DN19729_c0_g3/TRINITY_DN22905_c0_g1/TRINITY_DN1060_c1_g1/TRINITY_DN11886_c0_g1/TRINITY_DN1384_c0_g1/TRINITY_DN9521_c0_g1/TRINITY_DN8644_c0_g1/TRINITY_DN8569_c0_g1/TRINITY_DN10063_c0_g1/T | 45 |
|------------|------------------------|---------|-----------|------------------------|-----------------------|------------------------|-------------------------------------------------------------------------------------------------------------------------------------------------------------------------------------------------------------------------------------------------------------------------------------------------------------------------------------------------------------------------------------------------------------------------------------------------------------------------------------------------------------------------------------------------------------------------------------------------------------------------------------------------------------------------------------------------------------------------------------------------------------------------------------------------|----|

|            |                                |         |           |                        |                       |                       |                                                                                                                                                                                                                                                                                                                                                                                                                                                                                                                                                                                                                                                                                                                                                                                          |    |
|------------|--------------------------------|---------|-----------|------------------------|-----------------------|-----------------------|------------------------------------------------------------------------------------------------------------------------------------------------------------------------------------------------------------------------------------------------------------------------------------------------------------------------------------------------------------------------------------------------------------------------------------------------------------------------------------------------------------------------------------------------------------------------------------------------------------------------------------------------------------------------------------------------------------------------------------------------------------------------------------------|----|
| GO:0060285 | cilium-dependent cell motility | 14/2626 | 20/33142  | $9.13 \times 10^{-12}$ | $1.43 \times 10^{-9}$ | $1.07 \times 10^{-9}$ | RINITY_DN4384_c0_g1/TRINITY_DN216_c0_g3/TRINITY_DN58043_c0_g1/TRINITY_DN1941_c0_g1/TRINITY_DN6505_c0_g1/TRINITY_DN10346_c1_g1/TRINITY_DN7471_c0_g1/TRINITY_DN18007_c0_g1/TRINITY_DN17100_c0_g1/TRINITY_DN1119_c0_g1<br>TRINITY_DN9451_c0_g1/TRINITY_DN1979_c0_g1/TRINITY_DN3077_c2_g1/TRINITY_DN4543_c0_g2/TRINITY_DN1197_c0_g1/TRINITY_DN3083_c0_g1/TRINITY_DN10076_c0_g1/TRINITY_DN8872_c0_g1/TRINITY_DN10133_c0_g1/TRINITY_DN16784_c0_g1/TRINITY_DN31689_c0_g1/TRINITY_DN9647_c0_g1/TRINITY_DN28131_c0_g1/TRINITY_DN3427_c0_g1<br>TRINITY_DN3991_c0_g1/TRINITY_DN7814_c0_g2/TRINITY_DN7437_c0_g1/TRINITY_DN72971_c0_g1/TRINITY_DN8746_c0_g3/TRINITY_DN2078_c0_g1/TRINITY_DN205_c0_g1/TRINITY_DN5613_c1_g1/TRINITY_DN11686_c1_g1/TRINITY_DN5886_c0_g1/TRINITY_DN5826_c0_g1/TRINITY_DN3 | 14 |
| GO:0070062 | extracellular exosome          | 67/2626 | 350/33142 | $1.22 \times 10^{-11}$ | $1.82 \times 10^{-9}$ | $1.36 \times 10^{-9}$ |                                                                                                                                                                                                                                                                                                                                                                                                                                                                                                                                                                                                                                                                                                                                                                                          | 67 |



923\_c0\_g1/TRINITY\_DN15748\_c0\_g1/TRINITY\_DN1120\_c0\_g2/TRINITY\_DN12607\_c0\_g1/TRINITY\_DN200\_c0\_g2/TRINITY\_DN8257\_c0\_g1/TRINITY\_DN2898\_c0\_g1/TRINITY\_DN10137\_c0\_g1/TRINITY\_DN306\_c2\_g1/TRINITY\_DN4826\_c1\_g1/TRINITY\_DN1338\_c0\_g1/TRINITY\_DN9333\_c0\_g1/TRINITY\_DN17565\_c0\_g1/TRINITY\_DN755\_c1\_g1/TRINITY\_DN1902\_c0\_g1/TRINITY\_DN5262\_c1\_g1/TRINITY\_DN1610\_c0\_g1/TRINITY\_DN7955\_c1\_g1/TRINITY\_DN2682\_c0\_g1/TRINITY\_DN1178\_c2\_g1/TRINITY\_DN271\_c0\_g1/TRINITY\_DN13138\_c0\_g1/TRINITY\_DN12134\_c0\_g1/TRINITY\_DN10569\_c0\_g2/TRINITY\_DN8625\_c0\_g1/TRINITY\_DN19224\_c0\_g1/TRINITY\_DN7326\_c0\_g1/TRINITY\_DN656\_c0\_g1/TRINITY\_DN56782\_c0\_g1/TRINITY\_DN15289\_c0\_g1/TRINITY\_DN9780\_c0\_g1/TRINITY\_DN16751\_c0\_g1/TRINITY\_DN953\_c0\_g1/TRINITY\_DN20484\_c0\_g3/TRINITY\_DN6745\_c0\_g1/TRINITY\_DN4554\_c0\_g1/TRINITY\_DN11144\_c0\_g1/TRINITY\_DN4

|            |                        |         |           |                        |                       |                       |                                                                                                                                                                                                                                                                                                                                                                                                                                                                                                                                                                                                                                                                                                                                                                                                                  |    |
|------------|------------------------|---------|-----------|------------------------|-----------------------|-----------------------|------------------------------------------------------------------------------------------------------------------------------------------------------------------------------------------------------------------------------------------------------------------------------------------------------------------------------------------------------------------------------------------------------------------------------------------------------------------------------------------------------------------------------------------------------------------------------------------------------------------------------------------------------------------------------------------------------------------------------------------------------------------------------------------------------------------|----|
| GO:0045087 | innate immune response | 42/2626 | 170/33142 | $2.22 \times 10^{-11}$ | $3.14 \times 10^{-9}$ | $2.35 \times 10^{-9}$ | 858_c1_g1/TRINITY_DN22607_c0_g1/TRINITY_DN2281_c0_g1/TRINITY_DN19600_c0_g1/TRINITY_DN4326_c0_g1/TRINITY_DN5274_c0_g1/TRINITY_DN5431_c0_g1/TRINITY_DN5956_c0_g2/TRINITY_DN216_c0_g3/TRINITY_DN12958_c0_g1/TRINITY_DN4839_c0_g1/TRINITY_DN39318_c0_g1/TRINITY_DN40189_c0_g1/TRINITY_DN12338_c0_g1/TRINITY_DN51_c0_g1/TRINITY_DN11599_c0_g1/TRINITY_DN6300_c0_g1/TRINITY_DN6541_c1_g2/TRINITY_DN4487_c3_g2/TRINITY_DN33530_c0_g1/TRINITY_DN15601_c0_g3/TRINITY_DN945_c0_g1/TRINITY_DN6944_c0_g1/TRINITY_DN1893_c0_g1/TRINITY_DN6113_c0_g1/TRINITY_DN6481_c0_g1/TRINITY_DN3487_c1_g1/TRINITY_DN10831_c0_g1/TRINITY_DN11325_c0_g1/TRINITY_DN6931_c0_g1/TRINITY_DN38512_c0_g1/TRINITY_DN22536_c0_g1/TRINITY_DN402_c1_g1/TRINITY_DN972_c0_g1/TRINITY_DN8352_c0_g1/TRINITY_DN4514_c0_g1/TRINITY_DN15618_c0_g1/TRINITY_DN | 42 |
|------------|------------------------|---------|-----------|------------------------|-----------------------|-----------------------|------------------------------------------------------------------------------------------------------------------------------------------------------------------------------------------------------------------------------------------------------------------------------------------------------------------------------------------------------------------------------------------------------------------------------------------------------------------------------------------------------------------------------------------------------------------------------------------------------------------------------------------------------------------------------------------------------------------------------------------------------------------------------------------------------------------|----|

|            |                            |         |          |                        |                       |                       |                                                                                                                                                                                                                                                                                                                                                                                                                                                                                                                                                                                                                                                                                                                                                                                      |    |
|------------|----------------------------|---------|----------|------------------------|-----------------------|-----------------------|--------------------------------------------------------------------------------------------------------------------------------------------------------------------------------------------------------------------------------------------------------------------------------------------------------------------------------------------------------------------------------------------------------------------------------------------------------------------------------------------------------------------------------------------------------------------------------------------------------------------------------------------------------------------------------------------------------------------------------------------------------------------------------------|----|
| GO:0003351 | epithelial cilium movement | 13/2626 | 18/33142 | $2.77 \times 10^{-11}$ | $3.72 \times 10^{-9}$ | $2.78 \times 10^{-9}$ | <p>9354_c0_g1/TRINITY_DN4097_c0_g1/TRINITY_DN5176_c0_g1/TRINITY_DN5049_c0_g1/TRINITY_DN4768_c0_g1/TRINITY_DN19263_c1_g1/TRINITY_DN19246_c0_g1/TRINITY_DN306_c2_g1/TRINITY_DN1338_c0_g1/TRINITY_DN14570_c0_g1/TRINITY_DN479_c0_g2/TRINITY_DN25583_c0_g1/TRINITY_DN16383_c1_g1/TRINITY_DN755_c1_g1/TRINITY_DN6677_c0_g1/TRINITY_DN9798_c0_g1/TRINITY_DN13662_c0_g1/TRINITY_DN2292_c2_g1/TRINITY_DN15618_c0_g2/TRINITY_DN7189_c1_g1/TRINITY_DN8043_c0_g1/TRINITY_DN7944_c0_g1/TRINITY_DN8352_c0_g2/TRINITY_DN1439_c0_g1</p> <p>TRINITY_DN6657_c0_g1/TRINITY_DN6327_c1_g1/TRINITY_DN7740_c0_g1/TRINITY_DN1979_c0_g2/TRINITY_DN7530_c0_g1/TRINITY_DN16168_c0_g1/TRINITY_DN7652_c0_g1/TRINITY_DN3665_c0_g1/TRINITY_DN15544_c0_g1/TRINITY_DN3299_c0_g1/TRINITY_DN7067_c0_g1/TRINITY_DN5</p> | 13 |
|------------|----------------------------|---------|----------|------------------------|-----------------------|-----------------------|--------------------------------------------------------------------------------------------------------------------------------------------------------------------------------------------------------------------------------------------------------------------------------------------------------------------------------------------------------------------------------------------------------------------------------------------------------------------------------------------------------------------------------------------------------------------------------------------------------------------------------------------------------------------------------------------------------------------------------------------------------------------------------------|----|



|            |            |         |           |                        |                       |                       |                                                                                                                                                                                                                                                                                                                                                                                                                                                                                                                                                                                                                                                                                                                                                                                                     |    |
|------------|------------|---------|-----------|------------------------|-----------------------|-----------------------|-----------------------------------------------------------------------------------------------------------------------------------------------------------------------------------------------------------------------------------------------------------------------------------------------------------------------------------------------------------------------------------------------------------------------------------------------------------------------------------------------------------------------------------------------------------------------------------------------------------------------------------------------------------------------------------------------------------------------------------------------------------------------------------------------------|----|
| GO:0005813 | centrosome | 44/2626 | 187/33142 | $4.29 \times 10^{-11}$ | $5.51 \times 10^{-9}$ | $4.13 \times 10^{-9}$ | 9259_c0_g1/TRINITY_DN2672_7_c0_g1<br>TRINITY_DN13157_c0_g1/TRINITY_DN6327_c1_g1/TRINITY_DN11936_c0_g1/TRINITY_DN6174_c0_g1/TRINITY_DN2450_c0_g2/TRINITY_DN5006_c0_g2/TRINITY_DN16186_c0_g1/TRINITY_DN2397_c0_g1/TRINITY_DN3071_c0_g1/TRINITY_DN3296_c0_g1/TRINITY_DN5173_c0_g1/TRINITY_DN19269_c0_g1/TRINITY_DN552_c0_g1/TRINITY_DN7556_c0_g1/TRINITY_DN4002_c0_g3/TRINITY_DN4644_c0_g1/TRINITY_DN9930_c0_g2/TRINITY_DN3762_c0_g1/TRINITY_DN11340_c0_g1/TRINITY_DN7145_c0_g1/TRINITY_DN233_c0_g1/TRINITY_DN13406_c0_g1/TRINITY_DN12886_c0_g1/TRINITY_DN7131_c0_g1/TRINITY_DN4474_c0_g1/TRINITY_DN306_c1_g2/TRINITY_DN2153_c0_g1/TRINITY_DN489_c2_g1/TRINITY_DN1117_c1_g1/TRINITY_DN2107_c2_g1/TRINITY_DN93_c0_g1/TRINITY_DN5312_c0_g1/TRINITY_DN9168_c0_g2/TRINITY_DN3299_c0_g1/TRINITY_DN1107_c1_g | 44 |
|------------|------------|---------|-----------|------------------------|-----------------------|-----------------------|-----------------------------------------------------------------------------------------------------------------------------------------------------------------------------------------------------------------------------------------------------------------------------------------------------------------------------------------------------------------------------------------------------------------------------------------------------------------------------------------------------------------------------------------------------------------------------------------------------------------------------------------------------------------------------------------------------------------------------------------------------------------------------------------------------|----|

|            |      |         |           |                        |                       |                       |                                                                                                                                                                                                                                                                                                                                                                                                                                                                                                                                                                                                                                                                                                                                                                                                                 |    |
|------------|------|---------|-----------|------------------------|-----------------------|-----------------------|-----------------------------------------------------------------------------------------------------------------------------------------------------------------------------------------------------------------------------------------------------------------------------------------------------------------------------------------------------------------------------------------------------------------------------------------------------------------------------------------------------------------------------------------------------------------------------------------------------------------------------------------------------------------------------------------------------------------------------------------------------------------------------------------------------------------|----|
| GO:0030424 | axon | 50/2626 | 241/33142 | $2.64 \times 10^{-10}$ | $3.24 \times 10^{-8}$ | $2.42 \times 10^{-8}$ | <p>1/TRINITY_DN4002_c0_g1/TRINITY_DN2006_c1_g2/TRINITY_DN3249_c0_g1/TRINITY_DN637_c0_g1/TRINITY_DN25627_c0_g1/TRINITY_DN23722_c0_g1/TRINITY_DN1908_c0_g1/TRINITY_DN3810_c0_g1/TRINITY_DN16662_c0_g1/TRINITY_DN7437_c0_g1/TRINITY_DN21399_c0_g2/TRINITY_DN32305_c0_g1/TRINITY_DN8323_c0_g1/TRINITY_DN16600_c0_g1/TRINITY_DN7371_c0_g1/TRINITY_DN3446_c0_g1/TRINITY_DN7807_c0_g1/TRINITY_DN3245_c0_g1/TRINITY_DN16444_c1_g1/TRINITY_DN1487_c0_g2/TRINITY_DN402_c1_g1/TRINITY_DN1100_c0_g1/TRINITY_DN16186_c0_g1/TRINITY_DN2868_c0_g2/TRINITY_DN13394_c0_g1/TRINITY_DN4811_c0_g1/TRINITY_DN6076_c0_g1/TRINITY_DN8355_c0_g1/TRINITY_DN2531_c0_g1/TRINITY_DN233_c0_g1/TRINITY_DN8012_c0_g1/TRINITY_DN10018_c0_g1/TRINITY_DN3816_c0_g1/TRINITY_DN8217_c1_g1/TRINITY_DN800_c0_g2/TRINITY_DN130_c0_g1/TRINITY_DN462</p> | 50 |
|------------|------|---------|-----------|------------------------|-----------------------|-----------------------|-----------------------------------------------------------------------------------------------------------------------------------------------------------------------------------------------------------------------------------------------------------------------------------------------------------------------------------------------------------------------------------------------------------------------------------------------------------------------------------------------------------------------------------------------------------------------------------------------------------------------------------------------------------------------------------------------------------------------------------------------------------------------------------------------------------------|----|

|            |                 |         |          |                        |                       |                       |                                                                                                                                                                                                                                                                                                                                                                                                                                                                                                                                                                                                                                                                                                                                                                                                          |    |
|------------|-----------------|---------|----------|------------------------|-----------------------|-----------------------|----------------------------------------------------------------------------------------------------------------------------------------------------------------------------------------------------------------------------------------------------------------------------------------------------------------------------------------------------------------------------------------------------------------------------------------------------------------------------------------------------------------------------------------------------------------------------------------------------------------------------------------------------------------------------------------------------------------------------------------------------------------------------------------------------------|----|
| GO:0003341 | cilium movement | 17/2626 | 36/33142 | $3.62 \times 10^{-10}$ | $4.26 \times 10^{-8}$ | $3.19 \times 10^{-8}$ | 0_c0_g1/TRINITY_DN3665_c0_g1/TRINITY_DN1035_c0_g3/TRINITY_DN10569_c0_g2/TRINITY_DN7898_c0_g1/TRINITY_DN35269_c0_g1/TRINITY_DN8599_c1_g1/TRINITY_DN2475_c0_g1/TRINITY_DN12452_c0_g1/TRINITY_DN6745_c0_g1/TRINITY_DN2746_c0_g1/TRINITY_DN2165_c3_g1/TRINITY_DN13362_c0_g1/TRINITY_DN9158_c3_g1/TRINITY_DN14953_c0_g3/TRINITY_DN709_c0_g1/TRINITY_DN7200_c0_g2/TRINITY_DN14663_c0_g1/TRINITY_DN16530_c0_g1/TRINITY_DN28241_c0_g1/TRINITY_DN52030_c0_g1/TRINITY_DN13354_c0_g1/TRINITY_DN49433_c0_g1/TRINITY_DN9451_c0_g1/TRINITY_DN1979_c0_g1/TRINITY_DN3083_c0_g1/TRINITY_DN1979_c1_g1/TRINITY_DN9195_c0_g1/TRINITY_DN18134_c0_g1/TRINITY_DN9676_c0_g1/TRINITY_DN15113_c0_g1/TRINITY_DN5914_c0_g1/TRINITY_DN5968_c0_g1/TRINITY_DN8872_c0_g1/TRINITY_DN14798_c0_g1/TRINITY_DN3299_c0_g1/TRINITY_DN4533_c4_g1 | 17 |
|------------|-----------------|---------|----------|------------------------|-----------------------|-----------------------|----------------------------------------------------------------------------------------------------------------------------------------------------------------------------------------------------------------------------------------------------------------------------------------------------------------------------------------------------------------------------------------------------------------------------------------------------------------------------------------------------------------------------------------------------------------------------------------------------------------------------------------------------------------------------------------------------------------------------------------------------------------------------------------------------------|----|

|            |                                              |         |          |                        |                       |                       |                                                                                                                                                                                                                                                                                                                                                                                                                                                                                                                                                                                                                                                                                                                                                                                                 |    |
|------------|----------------------------------------------|---------|----------|------------------------|-----------------------|-----------------------|-------------------------------------------------------------------------------------------------------------------------------------------------------------------------------------------------------------------------------------------------------------------------------------------------------------------------------------------------------------------------------------------------------------------------------------------------------------------------------------------------------------------------------------------------------------------------------------------------------------------------------------------------------------------------------------------------------------------------------------------------------------------------------------------------|----|
| GO:0043204 | perikaryon                                   | 25/2626 | 77/33142 | $5.29 \times 10^{-10}$ | $5.97 \times 10^{-8}$ | $4.47 \times 10^{-8}$ | g1/TRINITY_DN31689_c0_g1/TRINITY_DN5840_c0_g1/TRINITY_DN63431_c0_g1TRINITY_DN21399_c0_g2/TRINITY_DN8323_c0_g1/TRINITY_DN3446_c0_g1/TRINITY_DN7807_c0_g1/TRINITY_DN402_c1_g1/TRINITY_DN15486_c0_g2/TRINITY_DN13394_c0_g1/TRINITY_DN4811_c0_g1/TRINITY_DN2557_c0_g2/TRINITY_DN2786_c0_g1/TRINITY_DN8355_c0_g1/TRINITY_DN233_c0_g1/TRINITY_DN8012_c0_g1/TRINITY_DN1765_c2_g1/TRINITY_DN3816_c0_g1/TRINITY_DN10569_c0_g2/TRINITY_DN13011_c0_g1/TRINITY_DN9041_c0_g1/TRINITY_DN716_c0_g1/TRINITY_DN7200_c0_g2/TRINITY_DN9041_c0_g2/TRINITY_DN4000_c0_g2/TRINITY_DN4784_c1_g1/TRINITY_DN16754_c0_g1/TRINITY_DN18471_c0_g2TRINITY_DN21399_c0_g2/TRINITY_DN16006_c0_g1/TRINITY_DN30262_c0_g1/TRINITY_DN4329_c1_g1/TRINITY_DN9375_c0_g1/TRINITY_DN18321_c0_g1/TRINITY_DN8355_c0_g1/TRINITY_DN15308_c0_g2 | 25 |
| GO:0050804 | modulation of chemical synaptic transmission | 20/2626 | 51/33142 | $6.21 \times 10^{-10}$ | $6.74 \times 10^{-8}$ | $5.05 \times 10^{-8}$ |                                                                                                                                                                                                                                                                                                                                                                                                                                                                                                                                                                                                                                                                                                                                                                                                 | 20 |

|            |                                |         |           |                             |                            |                            |                                                                                                                                                                                                                                                                                                                                                                                                                                                                                                                                                                                                                                                                                                                                                                                                                                                                                                                               |    |
|------------|--------------------------------|---------|-----------|-----------------------------|----------------------------|----------------------------|-------------------------------------------------------------------------------------------------------------------------------------------------------------------------------------------------------------------------------------------------------------------------------------------------------------------------------------------------------------------------------------------------------------------------------------------------------------------------------------------------------------------------------------------------------------------------------------------------------------------------------------------------------------------------------------------------------------------------------------------------------------------------------------------------------------------------------------------------------------------------------------------------------------------------------|----|
| GO:0007268 | chemical synaptic transmission | 33/2626 | 127/33142 | 7.38 ×<br>10 <sup>-10</sup> | 7.72 ×<br>10 <sup>-8</sup> | 5.78 ×<br>10 <sup>-8</sup> | /TRINITY_DN1765_c2_g1/TRI<br>NITY_DN3816_c0_g1/TRINIT<br>Y_DN9041_c0_g1/TRINITY_D<br>N4029_c0_g1/TRINITY_DN15<br>420_c0_g1/TRINITY_DN7687_<br>c0_g1/TRINITY_DN5274_c0_g<br>1/TRINITY_DN7200_c0_g2/TR<br>INITY_DN7523_c0_g1/TRINIT<br>Y_DN9041_c0_g2/TRINITY_D<br>N49433_c0_g1/TRINITY_DN2<br>1399_c0_g1<br>TRINITY_DN21399_c0_g2/TRI<br>NITY_DN4032_c0_g1/TRINIT<br>Y_DN2639_c0_g1/TRINITY_D<br>N1748_c0_g1/TRINITY_DN27<br>38_c0_g1/TRINITY_DN5470_c<br>0_g1/TRINITY_DN11896_c0_g<br>2/TRINITY_DN5859_c0_g1/TR<br>INITY_DN4958_c0_g1/TRINIT<br>Y_DN740_c0_g1/TRINITY_D<br>N17565_c0_g1/TRINITY_DN1<br>9321_c0_g1/TRINITY_DN2598<br>_c0_g2/TRINITY_DN11938_c0<br>_g1/TRINITY_DN1765_c2_g1/<br>TRINITY_DN1267_c0_g2/TRI<br>NITY_DN3816_c0_g1/TRINIT<br>Y_DN84830_c0_g1/TRINITY_<br>DN11846_c0_g1/TRINITY_DN<br>13011_c0_g1/TRINITY_DN904<br>1_c0_g1/TRINITY_DN2165_c3<br>_g1/TRINITY_DN716_c0_g1/T<br>RINITY_DN2938_c3_g1/TRIN | 33 |
|------------|--------------------------------|---------|-----------|-----------------------------|----------------------------|----------------------------|-------------------------------------------------------------------------------------------------------------------------------------------------------------------------------------------------------------------------------------------------------------------------------------------------------------------------------------------------------------------------------------------------------------------------------------------------------------------------------------------------------------------------------------------------------------------------------------------------------------------------------------------------------------------------------------------------------------------------------------------------------------------------------------------------------------------------------------------------------------------------------------------------------------------------------|----|

|            |                    |         |           |                       |                       |                       |                                                                                                                                                                                                                                                                                                                                                                                                                                                                                                                                                                                                                                                                                                                                                                                                          |    |
|------------|--------------------|---------|-----------|-----------------------|-----------------------|-----------------------|----------------------------------------------------------------------------------------------------------------------------------------------------------------------------------------------------------------------------------------------------------------------------------------------------------------------------------------------------------------------------------------------------------------------------------------------------------------------------------------------------------------------------------------------------------------------------------------------------------------------------------------------------------------------------------------------------------------------------------------------------------------------------------------------------------|----|
| GO:0031090 | organelle membrane | 46/2626 | 220/33142 | $1.03 \times 10^{-9}$ | $1.04 \times 10^{-7}$ | $7.79 \times 10^{-8}$ | ITY_DN15420_c0_g1/TRINITY_DN7200_c0_g2/TRINITY_DN11061_c0_g2/TRINITY_DN9041_c0_g2/TRINITY_DN7318_c0_g1/TRINITY_DN4000_c0_g2/TRINITY_DN29720_c0_g2/TRINITY_DN21399_c0_g1/TRINITY_DN8692_c0_g1/TRINITY_DN788_c0_g2/TRINITY_DN12459_c0_g1/TRINITY_DN510_c0_g1/TRINITY_DN4155_c0_g1/TRINITY_DN8337_c0_g3/TRINITY_DN16979_c0_g1/TRINITY_DN14638_c0_g1/TRINITY_DN2034_c0_g1/TRINITY_DN9929_c0_g1/TRINITY_DN80619_c0_g2/TRINITY_DN16674_c1_g3/TRINITY_DN16674_c1_g2/TRINITY_DN9323_c0_g2/TRINITY_DN23485_c0_g1/TRINITY_DN6729_c0_g2/TRINITY_DN6729_c0_g3/TRINITY_DN3648_c0_g6/TRINITY_DN8718_c0_g1/TRINITY_DN4475_c0_g2/TRINITY_DN10011_c0_g1/TRINITY_DN28084_c0_g1/TRINITY_DN6010_c3_g1/TRINITY_DN7771_c0_g2/TRINITY_DN10533_c0_g1/TRINITY_DN10583_c0_g1/TRINITY_DN996_c0_g1/TRINITY_DN5213_c0_g1/TRINITY_DN31 | 46 |
|------------|--------------------|---------|-----------|-----------------------|-----------------------|-----------------------|----------------------------------------------------------------------------------------------------------------------------------------------------------------------------------------------------------------------------------------------------------------------------------------------------------------------------------------------------------------------------------------------------------------------------------------------------------------------------------------------------------------------------------------------------------------------------------------------------------------------------------------------------------------------------------------------------------------------------------------------------------------------------------------------------------|----|

|            |                      |         |          |                       |                       |                       |                                                                                                                                                                                                                                                                                                                                                                                                                                                                                                                                                                                                                                                                                                                                                                                              |    |
|------------|----------------------|---------|----------|-----------------------|-----------------------|-----------------------|----------------------------------------------------------------------------------------------------------------------------------------------------------------------------------------------------------------------------------------------------------------------------------------------------------------------------------------------------------------------------------------------------------------------------------------------------------------------------------------------------------------------------------------------------------------------------------------------------------------------------------------------------------------------------------------------------------------------------------------------------------------------------------------------|----|
| GO:0042734 | presynaptic membrane | 19/2626 | 48/33142 | $1.38 \times 10^{-9}$ | $1.34 \times 10^{-7}$ | $1.00 \times 10^{-7}$ | 28_c0_g2/TRINITY_DN8567_c0_g1/TRINITY_DN25933_c0_g2/TRINITY_DN8705_c0_g1/TRINITY_DN13226_c0_g1/TRINITY_DN21490_c0_g1/TRINITY_DN10422_c0_g1/TRINITY_DN6985_c0_g1/TRINITY_DN3753_c0_g1/TRINITY_DN9897_c0_g1/TRINITY_DN5625_c1_g1/TRINITY_DN13697_c0_g1/TRINITY_DN4037_c0_g1/TRINITY_DN23688_c0_g1/TRINITY_DN33814_c0_g1/TRINITY_DN8845_c0_g3/TRINITY_DN8029_c0_g2/TRINITY_DN7224_c1_g3/TRINITY_DN25846_c0_g2/TRINITY_DN21399_c0_g2/TRINITY_DN18454_c0_g1/TRINITY_DN9375_c0_g1/TRINITY_DN8355_c0_g1/TRINITY_DN2161_c0_g1/TRINITY_DN1482_c0_g1/TRINITY_DN11938_c0_g1/TRINITY_DN1765_c2_g1/TRINITY_DN1420_c0_g1/TRINITY_DN3816_c0_g1/TRINITY_DN4620_c0_g1/TRINITY_DN9041_c0_g1/TRINITY_DN1482_c0_g2/TRINITY_DN7200_c0_g2/TRINITY_DN9041_c0_g2/TRINITY_DN12650_c0_g1/TRINITY_DN10344_c0_g1/TRINITY | 19 |
|------------|----------------------|---------|----------|-----------------------|-----------------------|-----------------------|----------------------------------------------------------------------------------------------------------------------------------------------------------------------------------------------------------------------------------------------------------------------------------------------------------------------------------------------------------------------------------------------------------------------------------------------------------------------------------------------------------------------------------------------------------------------------------------------------------------------------------------------------------------------------------------------------------------------------------------------------------------------------------------------|----|

|            |                   |         |           |                            |                            |                            |                                                                                                                                                                                                                                                                                                                                                                                                                                                                                                                                                                                                                                                                                                                                                                                                                                                                                                                                |    |
|------------|-------------------|---------|-----------|----------------------------|----------------------------|----------------------------|--------------------------------------------------------------------------------------------------------------------------------------------------------------------------------------------------------------------------------------------------------------------------------------------------------------------------------------------------------------------------------------------------------------------------------------------------------------------------------------------------------------------------------------------------------------------------------------------------------------------------------------------------------------------------------------------------------------------------------------------------------------------------------------------------------------------------------------------------------------------------------------------------------------------------------|----|
| GO:0043005 | neuron projection | 39/2626 | 173/33142 | 2.00 ×<br>10 <sup>-9</sup> | 1.88 ×<br>10 <sup>-7</sup> | 1.41 ×<br>10 <sup>-7</sup> | _DN49433_c0_g1/TRINITY_D<br>N21399_c0_g1<br>TRINITY_DN4032_c0_g1/TRI<br>NITY_DN1487_c0_g2/TRINIT<br>Y_DN18454_c0_g1/TRINITY_<br>DN954_c0_g1/TRINITY_DN14<br>21_c0_g1/TRINITY_DN2557_c<br>0_g2/TRINITY_DN5859_c0_g1<br>/TRINITY_DN27259_c0_g1/TR<br>INITY_DN31967_c0_g1/TRINI<br>TY_DN233_c0_g1/TRINITY_D<br>N4958_c0_g1/TRINITY_DN15<br>030_c0_g2/TRINITY_DN30182<br>_c0_g1/TRINITY_DN11938_c0<br>_g1/TRINITY_DN12463_c0_g1<br>/TRINITY_DN130_c0_g1/TRI<br>NITY_DN84830_c0_g1/TRINI<br>TY_DN13011_c0_g1/TRINITY<br>_DN93_c0_g1/TRINITY_DN21<br>20_c1_g1/TRINITY_DN716_c0<br>_g1/TRINITY_DN58254_c0_g1<br>/TRINITY_DN19691_c1_g1/TR<br>INITY_DN2938_c3_g1/TRINIT<br>Y_DN273_c1_g1/TRINITY_D<br>N11061_c0_g2/TRINITY_DN1<br>2650_c0_g1/TRINITY_DN1466<br>3_c0_g1/TRINITY_DN39318_c<br>0_g1/TRINITY_DN428_c0_g1/<br>TRINITY_DN28241_c0_g1/TRI<br>NITY_DN1186_c0_g1/TRINIT<br>Y_DN4000_c0_g2/TRINITY_D<br>N2961_c0_g1/TRINITY_DN29 | 39 |
|------------|-------------------|---------|-----------|----------------------------|----------------------------|----------------------------|--------------------------------------------------------------------------------------------------------------------------------------------------------------------------------------------------------------------------------------------------------------------------------------------------------------------------------------------------------------------------------------------------------------------------------------------------------------------------------------------------------------------------------------------------------------------------------------------------------------------------------------------------------------------------------------------------------------------------------------------------------------------------------------------------------------------------------------------------------------------------------------------------------------------------------|----|



|            |                                                              |         |          |                       |                       |                       |                                                                                                                                                                                                                                                                                                                                                                                                                                                                                                                                                                                                                                                                                                                                                                                              |    |
|------------|--------------------------------------------------------------|---------|----------|-----------------------|-----------------------|-----------------------|----------------------------------------------------------------------------------------------------------------------------------------------------------------------------------------------------------------------------------------------------------------------------------------------------------------------------------------------------------------------------------------------------------------------------------------------------------------------------------------------------------------------------------------------------------------------------------------------------------------------------------------------------------------------------------------------------------------------------------------------------------------------------------------------|----|
| GO:0036159 | inner dynein arm assembly                                    | 10/2626 | 13/33142 | $2.20 \times 10^{-9}$ | $2.00 \times 10^{-7}$ | $1.49 \times 10^{-7}$ | 720_c0_g2/TRINITY_DN16754_c0_g1/TRINITY_DN49433_c0_g1/TRINITY_DN14134_c0_g1/TRINITY_DN8692_c0_g1/TRINITY_DN6657_c0_g1/TRINITY_DN19725_c0_g1/TRINITY_DN1979_c0_g2/TRINITY_DN1979_c0_g1/TRINITY_DN20881_c0_g2/TRINITY_DN3083_c0_g1/TRINITY_DN15113_c0_g1/TRINITY_DN5914_c0_g1/TRINITY_DN8872_c0_g1/TRINITY_DN3299_c0_g1/TRINITY_DN2006_c0_g1/TRINITY_DN2770_c0_g1/TRINITY_DN5871_c1_g1/TRINITY_DN1478_c1_g3/TRINITY_DN1468_c0_g1/TRINITY_DN10811_c0_g1/TRINITY_DN10798_c0_g1/TRINITY_DN11056_c1_g1/TRINITY_DN11061_c0_g2/TRINITY_DN24632_c0_g1/TRINITY_DN216_c0_g3/TRINITY_DN7437_c0_g1/TRINITY_DN9358_c0_g1/TRINITY_DN72971_c0_g1/TRINITY_DN16444_c1_g1/TRINITY_DN5613_c1_g1/TRINITY_DN1557_c0_g1/TRINITY_DN6174_c0_g1/TRINITY_DN47_c0_g1/TRINITY_DN388_c0_g1/TRINITY_DN3296_c0_g1/TRINITY_DN | 10 |
| GO:0015651 | quaternary ammonium group transmembrane transporter activity | 11/2626 | 16/33142 | $2.28 \times 10^{-9}$ | $2.00 \times 10^{-7}$ | $1.49 \times 10^{-7}$ | 468_c0_g1/TRINITY_DN10811_c0_g1/TRINITY_DN10798_c0_g1/TRINITY_DN11056_c1_g1/TRINITY_DN11061_c0_g2/TRINITY_DN24632_c0_g1/TRINITY_DN216_c0_g3/TRINITY_DN7437_c0_g1/TRINITY_DN9358_c0_g1/TRINITY_DN72971_c0_g1/TRINITY_DN16444_c1_g1/TRINITY_DN5613_c1_g1/TRINITY_DN1557_c0_g1/TRINITY_DN6174_c0_g1/TRINITY_DN47_c0_g1/TRINITY_DN388_c0_g1/TRINITY_DN3296_c0_g1/TRINITY_DN                                                                                                                                                                                                                                                                                                                                                                                                                      | 11 |
| GO:0007605 | sensory perception of sound                                  | 25/2626 | 82/33142 | $2.33 \times 10^{-9}$ | $2.00 \times 10^{-7}$ | $1.49 \times 10^{-7}$ | 5613_c1_g1/TRINITY_DN1557_c0_g1/TRINITY_DN6174_c0_g1/TRINITY_DN47_c0_g1/TRINITY_DN388_c0_g1/TRINITY_DN3296_c0_g1/TRINITY_DN                                                                                                                                                                                                                                                                                                                                                                                                                                                                                                                                                                                                                                                                  | 25 |

|            |              |         |           |                       |                       |                       |                                                                                                                                                                                                                                                                                                                                                                                                                                                                                                                                                                                                                                                                                                                                                                                                       |    |
|------------|--------------|---------|-----------|-----------------------|-----------------------|-----------------------|-------------------------------------------------------------------------------------------------------------------------------------------------------------------------------------------------------------------------------------------------------------------------------------------------------------------------------------------------------------------------------------------------------------------------------------------------------------------------------------------------------------------------------------------------------------------------------------------------------------------------------------------------------------------------------------------------------------------------------------------------------------------------------------------------------|----|
| GO:0005856 | cytoskeleton | 48/2626 | 242/33142 | $2.85 \times 10^{-9}$ | $2.36 \times 10^{-7}$ | $1.77 \times 10^{-7}$ | 4826_c1_g1/TRINITY_DN16407_c1_g1/TRINITY_DN85_c0_g1/TRINITY_DN7759_c0_g1/TRINITY_DN5459_c0_g1/TRINITY_DN1267_c0_g2/TRINITY_DN25715_c0_g1/TRINITY_DN23750_c0_g1/TRINITY_DN2746_c0_g1/TRINITY_DN22905_c0_g1/TRINITY_DN338_c0_g1/TRINITY_DN26007_c0_g2/TRINITY_DN2094_c0_g1/TRINITY_DN2347_c1_g1/TRINITY_DN43641_c0_g1/TRINITY_DN9277_c0_g1/TRINITY_DN9358_c0_g1/TRINITY_DN3120_c0_g1/TRINITY_DN57787_c0_g1/TRINITY_DN2729_c0_g1/TRINITY_DN235_c0_g1/TRINITY_DN47_c0_g1/TRINITY_DN15748_c0_g1/TRINITY_DN14031_c0_g1/TRINITY_DN9720_c0_g1/TRINITY_DN69323_c0_g1/TRINITY_DN15574_c0_g1/TRINITY_DN7939_c1_g1/TRINITY_DN6222_c0_g1/TRINITY_DN16032_c0_g1/TRINITY_DN36928_c0_g1/TRINITY_DN7759_c0_g1/TRINITY_DN17565_c0_g1/TRINITY_DN1633_c0_g1/TRINITY_DN1775_c0_g3/TRINITY_DN1420_c0_g1/TRINITY_DN6081_c1_g | 48 |
|------------|--------------|---------|-----------|-----------------------|-----------------------|-----------------------|-------------------------------------------------------------------------------------------------------------------------------------------------------------------------------------------------------------------------------------------------------------------------------------------------------------------------------------------------------------------------------------------------------------------------------------------------------------------------------------------------------------------------------------------------------------------------------------------------------------------------------------------------------------------------------------------------------------------------------------------------------------------------------------------------------|----|

|            |               |         |           |                            |                            |                            |                                                                                                                                                                                                                                                                                                                                                                                                                                                                                                                                                                                                                                                                                                                                                                                                                 |    |
|------------|---------------|---------|-----------|----------------------------|----------------------------|----------------------------|-----------------------------------------------------------------------------------------------------------------------------------------------------------------------------------------------------------------------------------------------------------------------------------------------------------------------------------------------------------------------------------------------------------------------------------------------------------------------------------------------------------------------------------------------------------------------------------------------------------------------------------------------------------------------------------------------------------------------------------------------------------------------------------------------------------------|----|
| GO:0006811 | ion transport | 55/2626 | 299/33142 | 3.65 ×<br>10 <sup>-9</sup> | 2.94 ×<br>10 <sup>-7</sup> | 2.20 ×<br>10 <sup>-7</sup> | <p>2/TRINITY_DN377_c0_g1/TRINITY_DN22758_c0_g1/TRINITY_DN11027_c0_g1/TRINITY_DN11154_c0_g1/TRINITY_DN3665_c0_g1/TRINITY_DN19224_c0_g1/TRINITY_DN9935_c1_g1/TRINITY_DN1532_c0_g1/TRINITY_DN4325_c0_g1/TRINITY_DN8675_c0_g2/TRINITY_DN9279_c0_g1/TRINITY_DN30302_c0_g1/TRINITY_DN10587_c0_g1/TRINITY_DN3890_c0_g1/TRINITY_DN39318_c0_g1/TRINITY_DN6219_c0_g1/TRINITY_DN2347_c1_g1/TRINITY_DN7420_c0_g1/TRINITY_DN10176_c0_g1/TRINITY_DN15794_c0_g1/TRINITY_DN10111_c0_g1/TRINITY_DN6505_c0_g1/TRINITY_DN43066_c0_g1/TRINITY_DN26727_c0_g1/TRINITY_DN269_c0_g1/TRINITY_DN4487_c3_g2/TRINITY_DN7814_c0_g2/TRINITY_DN6597_c0_g1/TRINITY_DN755_c2_g1/TRINITY_DN4992_c0_g1/TRINITY_DN2078_c0_g1/TRINITY_DN1748_c0_g1/TRINITY_DN3179_c0_g2/TRINITY_DN5378_c1_g1/TRINITY_DN2279_c0_g1/TRINITY_DN8167_c0_g1/TRINITY_D</p> | 55 |
|------------|---------------|---------|-----------|----------------------------|----------------------------|----------------------------|-----------------------------------------------------------------------------------------------------------------------------------------------------------------------------------------------------------------------------------------------------------------------------------------------------------------------------------------------------------------------------------------------------------------------------------------------------------------------------------------------------------------------------------------------------------------------------------------------------------------------------------------------------------------------------------------------------------------------------------------------------------------------------------------------------------------|----|



N10654\_c0\_g1/TRINITY\_DN1  
7609\_c0\_g1/TRINITY\_DN4385  
\_c0\_g1/TRINITY\_DN3654\_c0\_  
g1/TRINITY\_DN24459\_c0\_g1/  
TRINITY\_DN10707\_c0\_g1/TRI  
NITY\_DN2307\_c0\_g1/TRINIT  
Y\_DN6323\_c1\_g1/TRINITY\_D  
N2924\_c1\_g1/TRINITY\_DN16  
407\_c1\_g1/TRINITY\_DN14468  
\_c0\_g1/TRINITY\_DN4958\_c0\_  
g1/TRINITY\_DN1316\_c0\_g1/T  
RINITY\_DN7659\_c0\_g1/TRIN  
ITY\_DN6079\_c0\_g1/TRINITY\_  
DN4477\_c0\_g1/TRINITY\_DN3  
180\_c0\_g1/TRINITY\_DN16593  
\_c0\_g1/TRINITY\_DN19635\_c0  
\_g1/TRINITY\_DN10811\_c0\_g1  
/TRINITY\_DN7213\_c0\_g1/TRI  
NITY\_DN13011\_c0\_g1/TRINI  
TY\_DN7054\_c0\_g1/TRINITY\_  
DN6655\_c0\_g1/TRINITY\_DN2  
0528\_c0\_g1/TRINITY\_DN6745  
\_c0\_g1/TRINITY\_DN5678\_c0\_  
g1/TRINITY\_DN14953\_c0\_g3/  
TRINITY\_DN2938\_c3\_g1/TRI  
NITY\_DN6690\_c1\_g1/TRINIT  
Y\_DN17398\_c0\_g2/TRINITY\_  
DN8644\_c0\_g1/TRINITY\_DN1  
1056\_c1\_g1/TRINITY\_DN3030  
\_c0\_g1/TRINITY\_DN4757\_c0\_  
g1/TRINITY\_DN2003\_c0\_g1/T  
RINITY\_DN4264\_c1\_g1/TRIN

| GO ID      | Biological Process       | Count   | Percentage | Value 1               | Value 2               | Value 3               | Count |
|------------|--------------------------|---------|------------|-----------------------|-----------------------|-----------------------|-------|
| GO:0042073 | intraciliary transport   | 12/2626 | 20/33142   | $4.12 \times 10^{-9}$ | $3.23 \times 10^{-7}$ | $2.42 \times 10^{-7}$ | 12    |
| GO:0006030 | chitin metabolic process | 20/2626 | 56/33142   | $4.27 \times 10^{-9}$ | $3.26 \times 10^{-7}$ | $2.44 \times 10^{-7}$ | 20    |

ITY\_DN35025\_c0\_g1/TRINITY\_DN4522\_c0\_g1/TRINITY\_DN4000\_c0\_g2/TRINITY\_DN4784\_c1\_g1/TRINITY\_DN4674\_c0\_g1/TRINITY\_DN10346\_c1\_g1/TRINITY\_DN940\_c0\_g1/TRINITY\_DN18471\_c0\_g2  
 TRINITY\_DN11509\_c0\_g1/TRINITY\_DN6327\_c1\_g1/TRINITY\_DN7196\_c0\_g1/TRINITY\_DN5006\_c0\_g2/TRINITY\_DN4043\_c0\_g1/TRINITY\_DN9930\_c0\_g2/TRINITY\_DN11340\_c0\_g1/TRINITY\_DN13406\_c0\_g1/TRINITY\_DN5875\_c0\_g1/TRINITY\_DN2153\_c0\_g1/TRINITY\_DN11027\_c0\_g1/TRINITY\_DN16662\_c0\_g1  
 TRINITY\_DN5758\_c0\_g1/TRINITY\_DN5801\_c2\_g2/TRINITY\_DN6856\_c0\_g1/TRINITY\_DN5537\_c1\_g1/TRINITY\_DN8247\_c0\_g2/TRINITY\_DN388\_c0\_g1/TRINITY\_DN18094\_c0\_g1/TRINITY\_DN12807\_c0\_g1/TRINITY\_DN5448\_c0\_g1/TRINITY\_DN16164\_c0\_g1/TRINITY\_DN5168\_c0\_g1/TRINITY\_DN3155\_c0\_g1/TRINITY\_DN8589\_c0\_g1/TRINITY\_DN1720\_c0\_g1/TRINITY\_DN4912\_c0\_g1/TRINITY\_DN5801\_c2\_g1/TRINITY



|            |                                              |         |          |                       |                       |                       |                                                                                                                                                                                                                                                                                                                                                                                                                                                                                                                                                                                                                                                                                                                                                                                                       |    |
|------------|----------------------------------------------|---------|----------|-----------------------|-----------------------|-----------------------|-------------------------------------------------------------------------------------------------------------------------------------------------------------------------------------------------------------------------------------------------------------------------------------------------------------------------------------------------------------------------------------------------------------------------------------------------------------------------------------------------------------------------------------------------------------------------------------------------------------------------------------------------------------------------------------------------------------------------------------------------------------------------------------------------------|----|
| GO:0032983 | kainate selective glutamate receptor complex | 9/2626  | 11/33142 | $5.77 \times 10^{-9}$ | $4.18 \times 10^{-7}$ | $3.13 \times 10^{-7}$ | TY_DN3115_c0_g3/TRINITY_DN5009_c0_g2/TRINITY_DN5372_c0_g1/TRINITY_DN1598_c1_g1/TRINITY_DN9937_c0_g1/TRINITY_DN21292_c0_g1/TRINITY_DN43641_c0_g1/TRINITY_DN4674_c0_g1/TRINITY_DN111160_c0_g1/TRINITY_DN4895_c1_g1<br>TRINITY_DN21399_c0_g2/TRINITY_DN8355_c0_g1/TRINITY_DN1765_c2_g1/TRINITY_DN3816_c0_g1/TRINITY_DN9041_c0_g1/TRINITY_DN15420_c0_g1/TRINITY_DN7200_c0_g2/TRINITY_DN9041_c0_g2/TRINITY_DN21399_c0_g1<br>TRINITY_DN9451_c0_g1/TRINITY_DN5849_c0_g2/TRINITY_DN1979_c0_g2/TRINITY_DN13313_c0_g1/TRINITY_DN1979_c0_g1/TRINITY_DN4543_c0_g2/TRINITY_DN233_c0_g1/TRINITY_DN3083_c0_g1/TRINITY_DN1979_c1_g1/TRINITY_DN4208_c0_g1/TRINITY_DN18134_c0_g1/TRINITY_DN1909_c0_g1/TRINITY_DN3767_c0_g1/TRINITY_DN10356_c0_g1/TRINITY_DN2372_c0_g1/TRINITY_DN5968_c0_g1/TRINITY_DN436_c2_g1/TRINITY_ | 9  |
| GO:0030286 | dynein complex                               | 25/2626 | 86/33142 | $6.95 \times 10^{-9}$ | $4.90 \times 10^{-7}$ | $3.67 \times 10^{-7}$ |                                                                                                                                                                                                                                                                                                                                                                                                                                                                                                                                                                                                                                                                                                                                                                                                       | 25 |

|            |                             |         |           |                       |                       |                       |                                                                                                                                                                                                                                                                                                                                                                                                                                                                                                                                                                                                                                                                                                                                                                                                                                                                                                            |    |
|------------|-----------------------------|---------|-----------|-----------------------|-----------------------|-----------------------|------------------------------------------------------------------------------------------------------------------------------------------------------------------------------------------------------------------------------------------------------------------------------------------------------------------------------------------------------------------------------------------------------------------------------------------------------------------------------------------------------------------------------------------------------------------------------------------------------------------------------------------------------------------------------------------------------------------------------------------------------------------------------------------------------------------------------------------------------------------------------------------------------------|----|
| GO:0016323 | basolateral plasma membrane | 30/2626 | 119/33142 | $9.24 \times 10^{-9}$ | $6.37 \times 10^{-7}$ | $4.77 \times 10^{-7}$ | DN14798_c0_g1/TRINITY_DN<br>35591_c0_g1/TRINITY_DN316<br>89_c0_g1/TRINITY_DN6282_c<br>0_g1/TRINITY_DN9647_c0_g1<br>/TRINITY_DN29956_c0_g1/TR<br>INITY_DN5578_c0_g1/TRINIT<br>Y_DN39491_c0_g1<br>TRINITY_DN1748_c0_g1/TRI<br>NITY_DN473_c0_g1/TRINITY<br>_DN5886_c0_g1/TRINITY_DN<br>2770_c0_g1/TRINITY_DN4503<br>_c0_g3/TRINITY_DN406_c0_g<br>3/TRINITY_DN5871_c1_g1/TR<br>INITY_DN5049_c0_g1/TRINIT<br>Y_DN10707_c0_g1/TRINITY_<br>DN2307_c0_g1/TRINITY_DN2<br>8373_c0_g1/TRINITY_DN2999<br>_c0_g1/TRINITY_DN7737_c0_<br>g1/TRINITY_DN16407_c1_g1/<br>TRINITY_DN32456_c0_g2/TRI<br>NITY_DN1267_c0_g2/TRINIT<br>Y_DN1614_c0_g1/TRINITY_D<br>N25715_c0_g1/TRINITY_DN4<br>06_c0_g2/TRINITY_DN10811_<br>c0_g1/TRINITY_DN8284_c0_g<br>1/TRINITY_DN6745_c0_g1/TR<br>INITY_DN11886_c0_g1/TRINI<br>TY_DN8644_c0_g1/TRINITY_<br>DN8569_c0_g1/TRINITY_DN2<br>3609_c0_g1/TRINITY_DN2463<br>2_c0_g1/TRINITY_DN4700_c0 | 30 |
|------------|-----------------------------|---------|-----------|-----------------------|-----------------------|-----------------------|------------------------------------------------------------------------------------------------------------------------------------------------------------------------------------------------------------------------------------------------------------------------------------------------------------------------------------------------------------------------------------------------------------------------------------------------------------------------------------------------------------------------------------------------------------------------------------------------------------------------------------------------------------------------------------------------------------------------------------------------------------------------------------------------------------------------------------------------------------------------------------------------------------|----|



|            |                         |         |           |                       |                       |                       |                                                                                                                                                                                                                                                                                                                                                                                                                                                                                                                                                                                                                                                                                                                                                                                                                                                                                                                            |    |
|------------|-------------------------|---------|-----------|-----------------------|-----------------------|-----------------------|----------------------------------------------------------------------------------------------------------------------------------------------------------------------------------------------------------------------------------------------------------------------------------------------------------------------------------------------------------------------------------------------------------------------------------------------------------------------------------------------------------------------------------------------------------------------------------------------------------------------------------------------------------------------------------------------------------------------------------------------------------------------------------------------------------------------------------------------------------------------------------------------------------------------------|----|
| GO:0005858 | axonemal dynein complex | 13/2626 | 25/33142  | $9.87 \times 10^{-9}$ | $6.64 \times 10^{-7}$ | $4.97 \times 10^{-7}$ | _g1/TRINITY_DN42565_c0_g1<br>/TRINITY_DN10346_c1_g1<br>TRINITY_DN9451_c0_g1/TRI<br>NITY_DN1979_c0_g1/TRINIT<br>Y_DN4543_c0_g2/TRINITY_D<br>N3083_c0_g1/TRINITY_DN18<br>134_c0_g1/TRINITY_DN5968_<br>c0_g1/TRINITY_DN14798_c0_<br>g1/TRINITY_DN10133_c0_g1/<br>TRINITY_DN16784_c0_g1/TRI<br>NITY_DN31689_c0_g1/TRINI<br>TY_DN9647_c0_g1/TRINITY_<br>DN28131_c0_g1/TRINITY_DN<br>3427_c0_g1<br>TRINITY_DN12244_c0_g1/TRI<br>NITY_DN398_c0_g1/TRINITY<br>_DN7148_c1_g1/TRINITY_DN<br>9277_c0_g1/TRINITY_DN8326<br>7_c0_g1/TRINITY_DN2841_c0<br>_g1/TRINITY_DN3740_c1_g1/<br>TRINITY_DN22536_c0_g1/TRI<br>NITY_DN6174_c0_g1/TRINIT<br>Y_DN59294_c0_g1/TRINITY_<br>DN3487_c0_g1/TRINITY_DN1<br>1100_c0_g1/TRINITY_DN388_<br>c0_g1/TRINITY_DN1266_c0_g<br>1/TRINITY_DN34715_c0_g1/T<br>RINITY_DN56882_c0_g1/TRI<br>NITY_DN4210_c0_g1/TRINIT<br>Y_DN2786_c0_g1/TRINITY_D<br>N1902_c0_g1/TRINITY_DN10<br>018_c0_g1/TRINITY_DN4620_ | 13 |
| GO:0007155 | cell adhesion           | 37/2626 | 169/33142 | $1.18 \times 10^{-8}$ | $7.73 \times 10^{-7}$ | $5.79 \times 10^{-7}$ | Y_DN59294_c0_g1/TRINITY_<br>DN3487_c0_g1/TRINITY_DN1<br>1100_c0_g1/TRINITY_DN388_<br>c0_g1/TRINITY_DN1266_c0_g<br>1/TRINITY_DN34715_c0_g1/T<br>RINITY_DN56882_c0_g1/TRI<br>NITY_DN4210_c0_g1/TRINIT<br>Y_DN2786_c0_g1/TRINITY_D<br>N1902_c0_g1/TRINITY_DN10<br>018_c0_g1/TRINITY_DN4620_                                                                                                                                                                                                                                                                                                                                                                                                                                                                                                                                                                                                                                   | 37 |

|            |                    |         |          |                            |                            |                            |                                                                                                                                                                                                                                                                                                                                                                                                                                                                                                                                                                                                                                                                                                                                                                                |    |
|------------|--------------------|---------|----------|----------------------------|----------------------------|----------------------------|--------------------------------------------------------------------------------------------------------------------------------------------------------------------------------------------------------------------------------------------------------------------------------------------------------------------------------------------------------------------------------------------------------------------------------------------------------------------------------------------------------------------------------------------------------------------------------------------------------------------------------------------------------------------------------------------------------------------------------------------------------------------------------|----|
| GO:0036064 | ciliary basal body | 20/2626 | 59/33142 | 1.20 ×<br>10 <sup>-8</sup> | 7.73 ×<br>10 <sup>-7</sup> | 5.79 ×<br>10 <sup>-7</sup> | <p>c0_g1/TRINITY_DN24147_c0_g1/TRINITY_DN2292_c2_g1/TRINITY_DN346_c0_g1/TRINITY_DN93_c0_g1/TRINITY_DN13362_c0_g1/TRINITY_DN144_c0_g1/TRINITY_DN12127_c0_g1/TRINITY_DN4321_c3_g1/TRINITY_DN21548_c0_g1/TRINITY_DN13862_c0_g2/TRINITY_DN44691_c0_g1/TRINITY_DN12958_c0_g1/TRINITY_DN9850_c0_g1/TRINITY_DN7420_c0_g1/TRINITY_DN2168_c3_g1/TRINITY_DN2285_c0_g1</p> <p>TRINITY_DN11509_c0_g1/TRINITY_DN6327_c1_g1/TRINITY_DN7740_c0_g1/TRINITY_DN36172_c0_g1/TRINITY_DN21912_c0_g1/TRINITY_DN4043_c0_g1/TRINITY_DN7556_c0_g1/TRINITY_DN12886_c0_g1/TRINITY_DN4988_c2_g1/TRINITY_DN5875_c0_g1/TRINITY_DN306_c1_g2/TRINITY_DN2153_c0_g1/TRINITY_DN5912_c0_g1/TRINITY_DN15411_c0_g1/TRINITY_DN2746_c0_g1/TRINITY_DN9168_c0_g2/TRINITY_DN10366_c0_g1/TRINITY_DN59259_c0_g1/TRINITY</p> | 20 |
|------------|--------------------|---------|----------|----------------------------|----------------------------|----------------------------|--------------------------------------------------------------------------------------------------------------------------------------------------------------------------------------------------------------------------------------------------------------------------------------------------------------------------------------------------------------------------------------------------------------------------------------------------------------------------------------------------------------------------------------------------------------------------------------------------------------------------------------------------------------------------------------------------------------------------------------------------------------------------------|----|

|            |                       |         |           |                       |                       |                       |                                                                                                                                                                                                                                                                                                                                                                                                                                                                                                                                                                                                                                                                                                                                                                                     |    |
|------------|-----------------------|---------|-----------|-----------------------|-----------------------|-----------------------|-------------------------------------------------------------------------------------------------------------------------------------------------------------------------------------------------------------------------------------------------------------------------------------------------------------------------------------------------------------------------------------------------------------------------------------------------------------------------------------------------------------------------------------------------------------------------------------------------------------------------------------------------------------------------------------------------------------------------------------------------------------------------------------|----|
| GO:0098978 | glutamatergic synapse | 29/2626 | 114/33142 | $1.30 \times 10^{-8}$ | $8.17 \times 10^{-7}$ | $6.11 \times 10^{-7}$ | _DN16662_c0_g1/TRINITY_DN8113_c0_g2<br>TRINITY_DN21399_c0_g2/TRINITY_DN2738_c0_g1/TRINITY_DN11100_c0_g1/TRINITY_DN6108_c0_g1/TRINITY_DN7277_c1_g1/TRINITY_DN31967_c0_g1/TRINITY_DN8355_c0_g1/TRINITY_DN740_c0_g1/TRINITY_DN1775_c0_g3/TRINITY_DN2598_c0_g2/TRINITY_DN11938_c0_g1/TRINITY_DN1765_c2_g1/TRINITY_DN1420_c0_g1/TRINITY_DN3816_c0_g1/TRINITY_DN9935_c1_g1/TRINITY_DN9041_c0_g1/TRINITY_DN10575_c2_g1/TRINITY_DN6910_c0_g1/TRINITY_DN15420_c0_g1/TRINITY_DN7200_c0_g2/TRINITY_DN11061_c0_g2/TRINITY_DN9041_c0_g2/TRINITY_DN12650_c0_g1/TRINITY_DN2094_c0_g1/TRINITY_DN1908_c0_g1/TRINITY_DN6505_c0_g1/TRINITY_DN49433_c0_g1/TRINITY_DN4487_c3_g2/TRINITY_DN14134_c0_g1<br>TRINITY_DN3991_c0_g1/TRINITY_DN2841_c0_g1/TRINITY_DN402_c1_g1/TRINITY_DN6515_c0_g1/TRINITY_DN12 | 29 |
| GO:0007283 | spermatogenesis       | 38/2626 | 177/33142 | $1.33 \times 10^{-8}$ | $8.17 \times 10^{-7}$ | $6.11 \times 10^{-7}$ | TRINITY_DN3991_c0_g1/TRINITY_DN2841_c0_g1/TRINITY_DN402_c1_g1/TRINITY_DN6515_c0_g1/TRINITY_DN12                                                                                                                                                                                                                                                                                                                                                                                                                                                                                                                                                                                                                                                                                     | 38 |

|            |                            |         |           |                       |                       |                       |                                                                                                                                                                                                                                                                                                                                                                                                                                                                                                                                                                                                                                                                                                                                                                                                               |    |
|------------|----------------------------|---------|-----------|-----------------------|-----------------------|-----------------------|---------------------------------------------------------------------------------------------------------------------------------------------------------------------------------------------------------------------------------------------------------------------------------------------------------------------------------------------------------------------------------------------------------------------------------------------------------------------------------------------------------------------------------------------------------------------------------------------------------------------------------------------------------------------------------------------------------------------------------------------------------------------------------------------------------------|----|
| GO:0007018 | microtubule-based movement | 30/2626 | 121/33142 | $1.40 \times 10^{-8}$ | $8.39 \times 10^{-7}$ | $6.28 \times 10^{-7}$ | 450_c0_g2/TRINITY_DN4544_c0_g1/TRINITY_DN7756_c0_g1/TRINITY_DN7743_c0_g1/TRINITY_DN7530_c0_g1/TRINITY_DN12628_c0_g2/TRINITY_DN21912_c0_g1/TRINITY_DN12628_c0_g1/TRINITY_DN3007_c0_g1/TRINITY_DN6323_c1_g1/TRINITY_DN2779_c1_g2/TRINITY_DN9930_c0_g2/TRINITY_DN3983_c0_g1/TRINITY_DN806_c0_g2/TRINITY_DN8796_c0_g1/TRINITY_DN7744_c0_g1/TRINITY_DN170_c1_g1/TRINITY_DN10783_c0_g1/TRINITY_DN7566_c0_g2/TRINITY_DN2682_c0_g1/TRINITY_DN1178_c2_g1/TRINITY_DN3665_c0_g1/TRINITY_DN2779_c1_g3/TRINITY_DN898_c0_g1/TRINITY_DN3032_c1_g2/TRINITY_DN2869_c2_g1/TRINITY_DN18013_c0_g1/TRINITY_DN7067_c0_g1/TRINITY_DN806_c0_g1/TRINITY_DN30782_c0_g2/TRINITY_DN1071_c0_g1/TRINITY_DN26727_c0_g1/TRINITY_DN14134_c0_g1/TRINITY_DN21101_c0_g1/TRINITY_DN11509_c0_g1/TRINITY_DN19161_c0_g1/TRINITY_DN9451_c0_g1/TRINITY_ | 30 |
|------------|----------------------------|---------|-----------|-----------------------|-----------------------|-----------------------|---------------------------------------------------------------------------------------------------------------------------------------------------------------------------------------------------------------------------------------------------------------------------------------------------------------------------------------------------------------------------------------------------------------------------------------------------------------------------------------------------------------------------------------------------------------------------------------------------------------------------------------------------------------------------------------------------------------------------------------------------------------------------------------------------------------|----|

|            |                          |         |          |                       |                       |                       |                                                                                                                                                                                                                                                                                                                                                                                                                                                                                                                                                                                                                                                                                                                                                                                                 |    |
|------------|--------------------------|---------|----------|-----------------------|-----------------------|-----------------------|-------------------------------------------------------------------------------------------------------------------------------------------------------------------------------------------------------------------------------------------------------------------------------------------------------------------------------------------------------------------------------------------------------------------------------------------------------------------------------------------------------------------------------------------------------------------------------------------------------------------------------------------------------------------------------------------------------------------------------------------------------------------------------------------------|----|
| GO:0015695 | organic cation transport | 11/2626 | 18/33142 | $1.43 \times 10^{-8}$ | $8.39 \times 10^{-7}$ | $6.28 \times 10^{-7}$ | DN1979_c0_g2/TRINITY_DN1265_c0_g1/TRINITY_DN5811_c0_g1/TRINITY_DN552_c0_g1/TRINITY_DN1979_c0_g1/TRINITY_DN4543_c0_g2/TRINITY_DN3083_c0_g1/TRINITY_DN1979_c1_g1/TRINITY_DN18134_c0_g1/TRINITY_DN1909_c0_g1/TRINITY_DN3767_c0_g1/TRINITY_DN10356_c0_g1/TRINITY_DN18791_c0_g1/TRINITY_DN5968_c0_g1/TRINITY_DN436_c2_g1/TRINITY_DN12133_c0_g1/TRINITY_DN14798_c0_g1/TRINITY_DN35591_c0_g1/TRINITY_DN31689_c0_g1/TRINITY_DN6282_c0_g1/TRINITY_DN9647_c0_g1/TRINITY_DN5922_c0_g1/TRINITY_DN29956_c0_g1/TRINITY_DN5578_c0_g1/TRINITY_DN13780_c0_g1/TRINITY_DN39491_c0_g1/TRINITY_DN15080_c0_g1<br>TRINITY_DN2006_c0_g1/TRINITY_DN5871_c1_g1/TRINITY_DN19520_c0_g1/TRINITY_DN1478_c1_g3/TRINITY_DN14468_c0_g1/TRINITY_DN10811_c0_g1/TRINITY_DN10798_c0_g1/TRINITY_DN11056_c1_g1/TRINITY_DN11061_c0_g2/T | 11 |
|------------|--------------------------|---------|----------|-----------------------|-----------------------|-----------------------|-------------------------------------------------------------------------------------------------------------------------------------------------------------------------------------------------------------------------------------------------------------------------------------------------------------------------------------------------------------------------------------------------------------------------------------------------------------------------------------------------------------------------------------------------------------------------------------------------------------------------------------------------------------------------------------------------------------------------------------------------------------------------------------------------|----|

|            |                |         |          |                       |                       |                       |                                                                                                                                                                                                                                                                                                                                                                                                                                                                                                                                                                                                                                                                                                                                                                                                           |    |
|------------|----------------|---------|----------|-----------------------|-----------------------|-----------------------|-----------------------------------------------------------------------------------------------------------------------------------------------------------------------------------------------------------------------------------------------------------------------------------------------------------------------------------------------------------------------------------------------------------------------------------------------------------------------------------------------------------------------------------------------------------------------------------------------------------------------------------------------------------------------------------------------------------------------------------------------------------------------------------------------------------|----|
| GO:0005814 | centriole      | 16/2626 | 39/33142 | $1.49 \times 10^{-8}$ | $8.47 \times 10^{-7}$ | $6.34 \times 10^{-7}$ | RINITY_DN24632_c0_g1/TRINITY_DN8729_c1_g1<br>TRINITY_DN9943_c0_g1/TRINITY_DN2841_c0_g1/TRINITY_DN13157_c0_g1/TRINITY_DN11936_c0_g1/TRINITY_DN15863_c0_g1/TRINITY_DN11896_c0_g2/TRINITY_DN3071_c0_g1/TRINITY_DN21912_c0_g1/TRINITY_DN7556_c0_g1/TRINITY_DN11340_c0_g1/TRINITY_DN3983_c0_g1/TRINITY_DN4988_c2_g1/TRINITY_DN306_c1_g2/TRINITY_DN5912_c0_g1/TRINITY_DN9168_c0_g2/TRINITY_DN10366_c0_g1/TRINITY_DN5758_c0_g1/TRINITY_DN5801_c2_g2/TRINITY_DN8264_c0_g1/TRINITY_DN6856_c0_g1/TRINITY_DN5537_c1_g1/TRINITY_DN8247_c0_g2/TRINITY_DN388_c0_g1/TRINITY_DN18094_c0_g1/TRINITY_DN4134_c0_g1/TRINITY_DN12807_c0_g1/TRINITY_DN5448_c0_g1/TRINITY_DN16164_c0_g1/TRINITY_DN5168_c0_g1/TRINITY_DN28998_c0_g1/TRINITY_DN3155_c0_g1/TRINITY_DN8589_c0_g1/TRINITY_DN19148_c0_g1/TRINITY_DN1720_c0_g1/TRINITY_ | 16 |
| GO:0008061 | chitin binding | 25/2626 | 89/33142 | $1.50 \times 10^{-8}$ | $8.47 \times 10^{-7}$ | $6.34 \times 10^{-7}$ |                                                                                                                                                                                                                                                                                                                                                                                                                                                                                                                                                                                                                                                                                                                                                                                                           | 25 |

|            |                                       |         |          |                       |                       |                       |                                                                                                                                                                                                                                                                                                                                                                                                                                                                                                                                                                                                                                                                                                                                                      |    |
|------------|---------------------------------------|---------|----------|-----------------------|-----------------------|-----------------------|------------------------------------------------------------------------------------------------------------------------------------------------------------------------------------------------------------------------------------------------------------------------------------------------------------------------------------------------------------------------------------------------------------------------------------------------------------------------------------------------------------------------------------------------------------------------------------------------------------------------------------------------------------------------------------------------------------------------------------------------------|----|
| GO:0052650 | NADP-retinol dehydrogenase activity   | 14/2626 | 30/33142 | $1.60 \times 10^{-8}$ | $8.85 \times 10^{-7}$ | $6.63 \times 10^{-7}$ | DN4912_c0_g1/TRINITY_DN5801_c2_g1/TRINITY_DN3148_c0_g1/TRINITY_DN12119_c0_g1/TRINITY_DN27704_c0_g1/TRINITY_DN13068_c0_g1/TRINITY_DN5674_c2_g1/TRINITY_DN146_c0_g1/TRINITY_DN3778_c2_g1/TRINITY_DN19075_c0_g1/TRINITY_DN21901_c0_g1/TRINITY_DN10027_c0_g1/TRINITY_DN51872_c0_g1/TRINITY_DN25301_c0_g1/TRINITY_DN31870_c0_g1/TRINITY_DN12540_c0_g1/TRINITY_DN96301_c0_g1/TRINITY_DN9845_c0_g2/TRINITY_DN20346_c0_g1/TRINITY_DN49166_c0_g1/TRINITY_DN33814_c0_g1/TRINITY_DN21399_c0_g2/TRINITY_DN16006_c0_g1/TRINITY_DN27259_c0_g1/TRINITY_DN8355_c0_g1/TRINITY_DN11938_c0_g1/TRINITY_DN1765_c2_g1/TRINITY_DN3816_c0_g1/TRINITY_DN9041_c0_g1/TRINITY_DN7200_c0_g2/TRINITY_DN9041_c0_g2/TRINITY_DN4674_c0_g1/TRINITY_DN49433_c0_g1/TRINITY_DN21399_c0_g1 | 14 |
| GO:0035249 | synaptic transmission , glutamatergic | 13/2626 | 26/33142 | $1.83 \times 10^{-8}$ | $9.94 \times 10^{-7}$ | $7.44 \times 10^{-7}$ | 5_c2_g1/TRINITY_DN3816_c0_g1/TRINITY_DN9041_c0_g1/TRINITY_DN7200_c0_g2/TRINITY_DN9041_c0_g2/TRINITY_DN4674_c0_g1/TRINITY_DN49433_c0_g1/TRINITY_DN21399_c0_g1                                                                                                                                                                                                                                                                                                                                                                                                                                                                                                                                                                                         | 13 |

|            |                              |         |          |                       |                       |                       |                                                                                                                                                                                                                                                                                                                                                                                                                     |    |
|------------|------------------------------|---------|----------|-----------------------|-----------------------|-----------------------|---------------------------------------------------------------------------------------------------------------------------------------------------------------------------------------------------------------------------------------------------------------------------------------------------------------------------------------------------------------------------------------------------------------------|----|
| GO:0004806 | triglyceride lipase activity | 19/2626 | 55/33142 | $1.95 \times 10^{-8}$ | $1.04 \times 10^{-6}$ | $7.79 \times 10^{-7}$ | TRINITY_DN5872_c0_g1/TRINITY_DN6455_c0_g1/TRINITY_DN6700_c0_g1/TRINITY_DN5164_c0_g3/TRINITY_DN1568_c0_g1/TRINITY_DN2675_c0_g1/TRINITY_DN5164_c0_g2/TRINITY_DN9375_c0_g1/TRINITY_DN23263_c0_g1/TRINITY_DN4211_c1_g3/TRINITY_DN39313_c0_g1/TRINITY_DN6482_c0_g1/TRINITY_DN18499_c0_g1/TRINITY_DN21191_c0_g1/TRINITY_DN4537_c0_g1/TRINITY_DN26376_c0_g1/TRINITY_DN2780_c2_g1/TRINITY_DN5274_c0_g1/TRINITY_DN3989_c1_g1 | 19 |
| GO:0045177 | apical part of cell          | 24/2626 | 84/33142 | $2.01 \times 10^{-8}$ | $1.05 \times 10^{-6}$ | $7.87 \times 10^{-7}$ | TRINITY_DN7384_c0_g1/TRINITY_DN4783_c0_g1/TRINITY_DN6174_c0_g1/TRINITY_DN11631_c0_g3/TRINITY_DN4514_c0_g1/TRINITY_DN42262_c0_g1/TRINITY_DN14877_c1_g1/TRINITY_DN3305_c0_g1/TRINITY_DN6348_c0_g1/TRINITY_DN1614_c0_g1/TRINITY_DN11583_c0_g1/TRINITY_DN25715_c0_g1/TRINITY_DN6810_c0_g1/TRINITY_DN3665_c0_g1/TRINITY_DN24147_c0_g1/TRINITY_DN10145_c1_g1/TRINITY_DN6745_c0_g1/TRI                                     | 24 |



|            |               |         |           |                       |                       |                       |                                                                                                                                                                                                                                                                                                                                                                                                                                                                                                                                                                                                                                                                                                                                                                                                                                                                                                                                                                                                                                                                                                                                                                                                                                                                                                                                                            |    |
|------------|---------------|---------|-----------|-----------------------|-----------------------|-----------------------|------------------------------------------------------------------------------------------------------------------------------------------------------------------------------------------------------------------------------------------------------------------------------------------------------------------------------------------------------------------------------------------------------------------------------------------------------------------------------------------------------------------------------------------------------------------------------------------------------------------------------------------------------------------------------------------------------------------------------------------------------------------------------------------------------------------------------------------------------------------------------------------------------------------------------------------------------------------------------------------------------------------------------------------------------------------------------------------------------------------------------------------------------------------------------------------------------------------------------------------------------------------------------------------------------------------------------------------------------------|----|
| GO:0007411 | axon guidance | 40/2626 | 195/33142 | $2.17 \times 10^{-8}$ | $1.11 \times 10^{-6}$ | $8.33 \times 10^{-7}$ | <p>           NITY_DN1118_c0_g1/TRINIT<br/>           Y_DN273_c1_g1/TRINITY_D<br/>           N2321_c0_g1/TRINITY_DN12<br/>           958_c0_g1/TRINITY_DN1941_<br/>           c0_g1/TRINITY_DN26727_c0_<br/>           g1/TRINITY_DN18007_c0_g1<br/>           TRINITY_DN180_c2_g1/TRIN<br/>           ITY_DN2244_c1_g1/TRINITY_<br/>           DN22690_c0_g1/TRINITY_DN<br/>           11100_c0_g1/TRINITY_DN829<br/>           7_c0_g1/TRINITY_DN4097_c0<br/>           _g1/TRINITY_DN154_c0_g1/T<br/>           RINITY_DN2133_c0_g1/TRIN<br/>           ITY_DN2868_c0_g2/TRINITY_<br/>           DN4169_c0_g2/TRINITY_DN4<br/>           169_c0_g1/TRINITY_DN6076_<br/>           c0_g1/TRINITY_DN2531_c0_g<br/>           1/TRINITY_DN479_c0_g2/TRI<br/>           NITY_DN5781_c0_g1/TRINIT<br/>           Y_DN2424_c0_g1/TRINITY_D<br/>           N8217_c1_g1/TRINITY_DN50<br/>           91_c0_g1/TRINITY_DN43399_<br/>           c0_g1/TRINITY_DN7898_c0_g<br/>           1/TRINITY_DN35269_c0_g1/T<br/>           RINITY_DN419_c0_g2/TRINI<br/>           TY_DN24893_c0_g1/TRINITY<br/>           _DN27045_c0_g1/TRINITY_D<br/>           N2475_c0_g1/TRINITY_DN12<br/>           452_c0_g1/TRINITY_DN4325_<br/>           c0_g1/TRINITY_DN10575_c2_<br/>           g1/TRINITY_DN9158_c3_g1/T<br/>           RINITY_DN3333_c0_g1/TRIN         </p> | 40 |
|------------|---------------|---------|-----------|-----------------------|-----------------------|-----------------------|------------------------------------------------------------------------------------------------------------------------------------------------------------------------------------------------------------------------------------------------------------------------------------------------------------------------------------------------------------------------------------------------------------------------------------------------------------------------------------------------------------------------------------------------------------------------------------------------------------------------------------------------------------------------------------------------------------------------------------------------------------------------------------------------------------------------------------------------------------------------------------------------------------------------------------------------------------------------------------------------------------------------------------------------------------------------------------------------------------------------------------------------------------------------------------------------------------------------------------------------------------------------------------------------------------------------------------------------------------|----|

|            |          |         |           |                       |                       |                       |                                                                                                                                                                                                                                                                                                                                                                                                                                                                                                                                                                                                                                                                                                                                                                                                                  |    |
|------------|----------|---------|-----------|-----------------------|-----------------------|-----------------------|------------------------------------------------------------------------------------------------------------------------------------------------------------------------------------------------------------------------------------------------------------------------------------------------------------------------------------------------------------------------------------------------------------------------------------------------------------------------------------------------------------------------------------------------------------------------------------------------------------------------------------------------------------------------------------------------------------------------------------------------------------------------------------------------------------------|----|
| GO:0030425 | dendrite | 43/2626 | 219/33142 | $2.53 \times 10^{-8}$ | $1.28 \times 10^{-6}$ | $9.56 \times 10^{-7}$ | <p>ITY_DN446_c1_g1/TRINITY_DN709_c0_g1/TRINITY_DN3241_c0_g1/TRINITY_DN44691_c0_g1/TRINITY_DN14663_c0_g1/TRINITY_DN428_c0_g1/TRINITY_DN2168_c3_g1/TRINITY_DN2961_c0_g1/TRINITY_DN3810_c0_g1/TRINITY_DN13354_c0_g1</p> <p>TRINITY_DN7437_c0_g1/TRINITY_DN21399_c0_g2/TRINITY_DN8323_c0_g1/TRINITY_DN3446_c0_g1/TRINITY_DN3245_c0_g1/TRINITY_DN1487_c0_g2/TRINITY_DN402_c1_g1/TRINITY_DN30087_c1_g2/TRINITY_DN1265_c0_g1/TRINITY_DN4329_c1_g1/TRINITY_DN13394_c0_g1/TRINITY_DN200_c0_g2/TRINITY_DN17663_c0_g1/TRINITY_DN2786_c0_g1/TRINITY_DN18321_c0_g1/TRINITY_DN8355_c0_g1/TRINITY_DN233_c0_g1/TRINITY_DN2415_c2_g1/TRINITY_DN8012_c0_g1/TRINITY_DN1765_c2_g1/TRINITY_DN3816_c0_g1/TRINITY_DN3665_c0_g1/TRINITY_DN9175_c0_g1/TRINITY_DN13011_c0_g1/TRINITY_DN8599_c1_g1/TRINITY_DN2475_c0_g1/TRINITY_DN2746_</p> | 43 |
|------------|----------|---------|-----------|-----------------------|-----------------------|-----------------------|------------------------------------------------------------------------------------------------------------------------------------------------------------------------------------------------------------------------------------------------------------------------------------------------------------------------------------------------------------------------------------------------------------------------------------------------------------------------------------------------------------------------------------------------------------------------------------------------------------------------------------------------------------------------------------------------------------------------------------------------------------------------------------------------------------------|----|

|            |                   |         |           |                       |                       |                       |                                                                                                                                                                                                                                                                                                                                                                                                                                                                                                                                                                                                                                                                                                                                                                                                            |    |
|------------|-------------------|---------|-----------|-----------------------|-----------------------|-----------------------|------------------------------------------------------------------------------------------------------------------------------------------------------------------------------------------------------------------------------------------------------------------------------------------------------------------------------------------------------------------------------------------------------------------------------------------------------------------------------------------------------------------------------------------------------------------------------------------------------------------------------------------------------------------------------------------------------------------------------------------------------------------------------------------------------------|----|
| GO:0007601 | visual perception | 31/2626 | 132/33142 | $3.18 \times 10^{-8}$ | $1.58 \times 10^{-6}$ | $1.18 \times 10^{-6}$ | <p>c0_g1/TRINITY_DN19691_c1_g1/TRINITY_DN26935_c0_g1/TRINITY_DN15420_c0_g1/TRINITY_DN7687_c0_g1/TRINITY_DN7200_c0_g2/TRINITY_DN3238_c0_g1/TRINITY_DN11061_c0_g2/TRINITY_DN12650_c0_g1/TRINITY_DN14663_c0_g1/TRINITY_DN16530_c0_g1/TRINITY_DN428_c0_g1/TRINITY_DN52030_c0_g1/TRINITY_DN4000_c0_g2/TRINITY_DN7084_c0_g1/TRINITY_DN784_c1_g1/TRINITY_DN26727_c0_g1</p> <p>TRINITY_DN8493_c0_g1/TRINITY_DN1487_c0_g2/TRINITY_DN19075_c0_g1/TRINITY_DN2489_c0_g1/TRINITY_DN15240_c0_g1/TRINITY_DN7582_c0_g1/TRINITY_DN7048_c0_g1/TRINITY_DN183_c0_g1/TRINITY_DN5239_c1_g2/TRINITY_DN47_c0_g1/TRINITY_DN1120_c0_g2/TRINITY_DN5871_c1_g1/TRINITY_DN5198_c0_g1/TRINITY_DN20958_c0_g1/TRINITY_DN2492_c0_g1/TRINITY_DN2924_c1_g1/TRINITY_DN41433_c0_g1/TRINITY_DN1229_c2_g1/TRINITY_DN31870_c0_g1/TRINITY_DN2095</p> | 31 |
|------------|-------------------|---------|-----------|-----------------------|-----------------------|-----------------------|------------------------------------------------------------------------------------------------------------------------------------------------------------------------------------------------------------------------------------------------------------------------------------------------------------------------------------------------------------------------------------------------------------------------------------------------------------------------------------------------------------------------------------------------------------------------------------------------------------------------------------------------------------------------------------------------------------------------------------------------------------------------------------------------------------|----|



|            |                                                 |         |           |                       |                       |                       |                                                                                                                                                                                                                                                                                                                                                                                                                                                                                                                                                                                                                                                                                                                                                                       |    |
|------------|-------------------------------------------------|---------|-----------|-----------------------|-----------------------|-----------------------|-----------------------------------------------------------------------------------------------------------------------------------------------------------------------------------------------------------------------------------------------------------------------------------------------------------------------------------------------------------------------------------------------------------------------------------------------------------------------------------------------------------------------------------------------------------------------------------------------------------------------------------------------------------------------------------------------------------------------------------------------------------------------|----|
| GO:0090557 | establishment of endothelial intestinal barrier | 12/2626 | 23/33142  | $3.53 \times 10^{-8}$ | $1.66 \times 10^{-6}$ | $1.24 \times 10^{-6}$ | Y_DN12402_c0_g1/TRINITY_DN4947_c0_g1/TRINITY_DN14093_c0_g1<br>TRINITY_DN19001_c0_g1/TRINITY_DN1614_c0_g1/TRINITY_DN23921_c0_g1/TRINITY_DN482_c1_g1/TRINITY_DN29856_c0_g1/TRINITY_DN1549_c0_g1/TRINITY_DN12127_c0_g1/TRINITY_DN40189_c0_g1/TRINITY_DN3178_c0_g1/TRINITY_DN484_c0_g1/TRINITY_DN244_c3_g1/TRINITY_DN61025_c0_g1<br>TRINITY_DN32009_c0_g1/TRINITY_DN16979_c0_g1/TRINITY_DN11954_c0_g1/TRINITY_DN638_c0_g2/TRINITY_DN23485_c0_g1/TRINITY_DN5087_c0_g1/TRINITY_DN10011_c0_g1/TRINITY_DN4160_c0_g1/TRINITY_DN10583_c0_g1/TRINITY_DN974_c0_g1/TRINITY_DN15324_c1_g1/TRINITY_DN13235_c0_g1/TRINITY_DN13226_c0_g1/TRINITY_DN1200_c2_g1/TRINITY_DN8845_c0_g3<br>TRINITY_DN7437_c0_g1/TRINITY_DN6455_c0_g1/TRINITY_DN77269_c0_g1/TRINITY_DN5164_c0_g3/TRINITY_DN8 | 12 |
| GO:0015020 | glucuronosyltransferase activity                | 15/2626 | 37/33142  | $5.11 \times 10^{-8}$ | $2.36 \times 10^{-6}$ | $1.77 \times 10^{-6}$ |                                                                                                                                                                                                                                                                                                                                                                                                                                                                                                                                                                                                                                                                                                                                                                       | 15 |
| GO:0006629 | lipid metabolic process                         | 41/2626 | 209/33142 | $5.43 \times 10^{-8}$ | $2.47 \times 10^{-6}$ | $1.85 \times 10^{-6}$ |                                                                                                                                                                                                                                                                                                                                                                                                                                                                                                                                                                                                                                                                                                                                                                       | 41 |

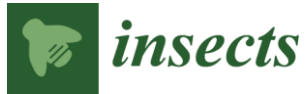

909\_c0\_g1/TRINITY\_DN11372  
\_c0\_g1/TRINITY\_DN11631\_c0  
\_g3/TRINITY\_DN3479\_c0\_g1/  
TRINITY\_DN21814\_c0\_g2/TRI  
NITY\_DN8236\_c0\_g1/TRINIT  
Y\_DN11204\_c0\_g1/TRINITY\_  
DN6049\_c1\_g2/TRINITY\_DN1  
659\_c1\_g2/TRINITY\_DN6767\_  
c0\_g1/TRINITY\_DN17663\_c0\_  
g1/TRINITY\_DN23263\_c0\_g1/  
TRINITY\_DN4826\_c1\_g1/TRI  
NITY\_DN3305\_c0\_g1/TRINIT  
Y\_DN4485\_c0\_g1/TRINITY\_D  
N59840\_c0\_g1/TRINITY\_DN2  
8084\_c0\_g1/TRINITY\_DN6435  
\_c0\_g3/TRINITY\_DN9779\_c0\_  
g1/TRINITY\_DN6810\_c0\_g1/T  
RINITY\_DN5693\_c0\_g2/TRIN  
ITY\_DN656\_c0\_g1/TRINITY\_  
DN5833\_c0\_g1/TRINITY\_DN9  
780\_c0\_g1/TRINITY\_DN40503  
\_c0\_g1/TRINITY\_DN4537\_c0\_  
g1/TRINITY\_DN596\_c8\_g1/TR  
INITY\_DN15536\_c0\_g1/TRINI  
TY\_DN5274\_c0\_g1/TRINITY\_  
DN10316\_c0\_g1/TRINITY\_DN  
4037\_c0\_g1/TRINITY\_DN3989  
\_c1\_g1/TRINITY\_DN12338\_c0  
\_g1/TRINITY\_DN5555\_c0\_g2/  
TRINITY\_DN43641\_c0\_g1/TRI  
NITY\_DN12549\_c0\_g1/TRINI  
TY\_DN18007\_c0\_g1

|            |                      |         |           |                       |                       |                       |                                                                                                                                                                                                                                                                                                                                                                                                                                                                                                                                                                                                                                                                                                                                                                                                              |    |
|------------|----------------------|---------|-----------|-----------------------|-----------------------|-----------------------|--------------------------------------------------------------------------------------------------------------------------------------------------------------------------------------------------------------------------------------------------------------------------------------------------------------------------------------------------------------------------------------------------------------------------------------------------------------------------------------------------------------------------------------------------------------------------------------------------------------------------------------------------------------------------------------------------------------------------------------------------------------------------------------------------------------|----|
| GO:0031012 | extracellular matrix | 22/2626 | 76/33142  | $5.97 \times 10^{-8}$ | $2.67 \times 10^{-6}$ | $2.00 \times 10^{-6}$ | TRINITY_DN398_c0_g1/TRINITY_DN2870_c0_g1/TRINITY_DN6305_c1_g1/TRINITY_DN950_c4_g1/TRINITY_DN3487_c0_g1/TRINITY_DN42941_c0_g1/TRINITY_DN388_c0_g1/TRINITY_DN1266_c0_g1/TRINITY_DN15399_c0_g1/TRINITY_DN1120_c0_g2/TRINITY_DN8217_c0_g1/TRINITY_DN4210_c0_g1/TRINITY_DN479_c0_g2/TRINITY_DN740_c0_g1/TRINITY_DN2868_c0_g1/TRINITY_DN7367_c0_g1/TRINITY_DN4620_c0_g1/TRINITY_DN4437_c0_g1/TRINITY_DN403_c1_g1/TRINITY_DN5908_c0_g1/TRINITY_DN27704_c0_g1/TRINITY_DN16986_c0_g2/TRINITY_DN21399_c0_g2/TRINITY_DN4329_c1_g1/TRINITY_DN6108_c0_g1/TRINITY_DN2786_c0_g1/TRINITY_DN15308_c0_g2/TRINITY_DN1775_c0_g3/TRINITY_DN1765_c2_g1/TRINITY_DN1420_c0_g1/TRINITY_DN3816_c0_g1/TRINITY_DN3722_c0_g1/TRINITY_DN10569_c0_g2/TRINITY_DN19224_c0_g1/TRINITY_DN9935_c1_g1/TRINITY_DN9041_c0_g1/TRINITY_DN2869_c2_g1/T | 22 |
| GO:0014069 | postsynaptic density | 27/2626 | 108/33142 | $6.04 \times 10^{-8}$ | $2.67 \times 10^{-6}$ | $2.00 \times 10^{-6}$ |                                                                                                                                                                                                                                                                                                                                                                                                                                                                                                                                                                                                                                                                                                                                                                                                              | 27 |

|            |                                                              |         |          |                       |                       |                       |                                                                                                                                                                                                                                                                                                                                                                                                                                                                                                                                                                                                                                                                                                                                                                                                |    |
|------------|--------------------------------------------------------------|---------|----------|-----------------------|-----------------------|-----------------------|------------------------------------------------------------------------------------------------------------------------------------------------------------------------------------------------------------------------------------------------------------------------------------------------------------------------------------------------------------------------------------------------------------------------------------------------------------------------------------------------------------------------------------------------------------------------------------------------------------------------------------------------------------------------------------------------------------------------------------------------------------------------------------------------|----|
| GO:0015277 | kainate selective glutamate receptor activity                | 9/2626  | 13/33142 | $6.47 \times 10^{-8}$ | $2.76 \times 10^{-6}$ | $2.06 \times 10^{-6}$ | RINITY_DN15420_c0_g1/TRINITY_DN7687_c0_g1/TRINITY_DN7200_c0_g2/TRINITY_DN3238_c0_g1/TRINITY_DN7523_c0_g1/TRINITY_DN9041_c0_g2/TRINITY_DN2094_c0_g1/TRINITY_DN428_c0_g1/TRINITY_DN7084_c0_g1/TRINITY_DN2961_c0_g1/TRINITY_DN6505_c0_g1/TRINITY_DN49433_c0_g1<br>TRINITY_DN21399_c0_g2/TRINITY_DN8355_c0_g1/TRINITY_DN1765_c2_g1/TRINITY_DN3816_c0_g1/TRINITY_DN9041_c0_g1/TRINITY_DN15420_c0_g1/TRINITY_DN7200_c0_g2/TRINITY_DN9041_c0_g2/TRINITY_DN21399_c0_g1<br>TRINITY_DN21399_c0_g2/TRINITY_DN8355_c0_g1/TRINITY_DN22381_c0_g1/TRINITY_DN1765_c2_g1/TRINITY_DN3816_c0_g1/TRINITY_DN31435_c0_g1/TRINITY_DN9041_c0_g1/TRINITY_DN7200_c0_g2/TRINITY_DN9041_c0_g2<br>TRINITY_DN3778_c2_g1/TRINITY_DN9219_c0_g1/TRINITY_DN51872_c0_g1/TRINITY_DN9375_c0_g1/TRINITY_DN12540_c0_g1/TRINITY_DN9630 | 9  |
| GO:0051967 | negative regulation of synaptic transmission , glutamatergic | 9/2626  | 13/33142 | $6.47 \times 10^{-8}$ | $2.76 \times 10^{-6}$ | $2.06 \times 10^{-6}$ | TRINITY_DN22381_c0_g1/TRINITY_DN1765_c2_g1/TRINITY_DN3816_c0_g1/TRINITY_DN31435_c0_g1/TRINITY_DN9041_c0_g1/TRINITY_DN7200_c0_g2/TRINITY_DN9041_c0_g2<br>TRINITY_DN3778_c2_g1/TRINITY_DN9219_c0_g1/TRINITY_DN51872_c0_g1/TRINITY_DN9375_c0_g1/TRINITY_DN12540_c0_g1/TRINITY_DN9630                                                                                                                                                                                                                                                                                                                                                                                                                                                                                                              | 9  |
| GO:0010842 | retina layer formation                                       | 12/2626 | 24/33142 | $6.54 \times 10^{-8}$ | $2.76 \times 10^{-6}$ | $2.06 \times 10^{-6}$ | TRINITY_DN9219_c0_g1/TRINITY_DN51872_c0_g1/TRINITY_DN9375_c0_g1/TRINITY_DN12540_c0_g1/TRINITY_DN9630                                                                                                                                                                                                                                                                                                                                                                                                                                                                                                                                                                                                                                                                                           | 12 |



|            |                    |         |           |                       |                       |                                                                                                                                                                                                                                                                                                                                                                                                                                                                                                                                                                                                                                                                                                                                                                                         |    |
|------------|--------------------|---------|-----------|-----------------------|-----------------------|-----------------------------------------------------------------------------------------------------------------------------------------------------------------------------------------------------------------------------------------------------------------------------------------------------------------------------------------------------------------------------------------------------------------------------------------------------------------------------------------------------------------------------------------------------------------------------------------------------------------------------------------------------------------------------------------------------------------------------------------------------------------------------------------|----|
| GO:0042383 | sarcolemma         | 19/2626 | 59/33142  | $7.14 \times 10^{-8}$ | $2.97 \times 10^{-6}$ | $2.22 \times 10^{-6}$                                                                                                                                                                                                                                                                                                                                                                                                                                                                                                                                                                                                                                                                                                                                                                   | 19 |
|            |                    |         |           |                       |                       | 1_c0_g1/TRINITY_DN4474_c0_g1/TRINITY_DN9845_c0_g2/TRINITY_DN8217_c1_g1/TRINITY_DN15468_c0_g1/TRINITY_DN20346_c0_g1/TRINITY_DN49166_c0_g1/TRINITY_DN5216_c1_g1/TRINITY_DN2738_c0_g1/TRINITY_DN15486_c0_g2/TRINITY_DN7743_c0_g1/TRINITY_DN200_c0_g2/TRINITY_DN16407_c1_g1/TRINITY_DN740_c0_g1/TRINITY_DN3180_c0_g1/TRINITY_DN2598_c0_g2/TRINITY_DN11154_c0_g1/TRINITY_DN93_c0_g1/TRINITY_DN6245_c0_g1/TRINITY_DN30302_c0_g1/TRINITY_DN5506_c0_g3/TRINITY_DN55372_c0_g1/TRINITY_DN10587_c0_g1/TRINITY_DN12958_c0_g1/TRINITY_DN6945_c0_g2/TRINITY_DN18471_c0_g2/TRINITY_DN7814_c0_g2/TRINITY_DN7437_c0_g1/TRINITY_DN8323_c0_g1/TRINITY_DN3446_c0_g1/TRINITY_DN72971_c0_g1/TRINITY_DN16936_c0_g1/TRINITY_DN8493_c0_g1/TRINITY_DN2078_c0_g1/TRINITY_DN43642_c0_g1/TRINITY_DN47_c0_g1/TRINITY_ |    |
| GO:0005765 | lysosomal membrane | 36/2626 | 174/33142 | $8.56 \times 10^{-8}$ | $3.50 \times 10^{-6}$ | $2.62 \times 10^{-6}$                                                                                                                                                                                                                                                                                                                                                                                                                                                                                                                                                                                                                                                                                                                                                                   | 36 |

|            |                       |         |           |                       |                       |                       |                                                                                                                                                                                                                                                                                                                                                                                                                                                                                                                                                                                                                                                                                                                                                                                                                   |    |
|------------|-----------------------|---------|-----------|-----------------------|-----------------------|-----------------------|-------------------------------------------------------------------------------------------------------------------------------------------------------------------------------------------------------------------------------------------------------------------------------------------------------------------------------------------------------------------------------------------------------------------------------------------------------------------------------------------------------------------------------------------------------------------------------------------------------------------------------------------------------------------------------------------------------------------------------------------------------------------------------------------------------------------|----|
| GO:0045211 | postsynaptic membrane | 29/2626 | 124/33142 | $9.63 \times 10^{-8}$ | $3.88 \times 10^{-6}$ | $2.91 \times 10^{-6}$ | DN13394_c0_g1/TRINITY_DN200_c0_g2/TRINITY_DN8257_c0_g1/TRINITY_DN8433_c1_g2/TRINITY_DN27259_c0_g1/TRINITY_DN4826_c1_g1/TRINITY_DN1482_c0_g1/TRINITY_DN7858_c0_g1/TRINITY_DN9333_c0_g1/TRINITY_DN4477_c0_g1/TRINITY_DN8012_c0_g1/TRINITY_DN9845_c0_g2/TRINITY_DN13943_c0_g1/TRINITY_DN4437_c0_g1/TRINITY_DN7045_c1_g1/TRINITY_DN9994_c0_g1/TRINITY_DN8433_c1_g1/TRINITY_DN4307_c0_g1/TRINITY_DN6603_c0_g1/TRINITY_DN4554_c0_g1/TRINITY_DN18131_c0_g1/TRINITY_DN1482_c0_g2/TRINITY_DN3354_c0_g1/TRINITY_DN55372_c0_g1/TRINITY_DN273_c1_g1/TRINITY_DN4674_c0_g1/TRINITY_DN21399_c0_g2/TRINITY_DN16006_c0_g1/TRINITY_DN9375_c0_g1/TRINITY_DN8355_c0_g1/TRINITY_DN161_c0_g1/TRINITY_DN4958_c0_g1/TRINITY_DN1316_c0_g1/TRINITY_DN15308_c0_g2/TRINITY_DN1765_c2_g1/TRINITY_DN3816_c0_g1/TRINITY_DN19635_c0_g1/TRINITY_DN | 29 |
|------------|-----------------------|---------|-----------|-----------------------|-----------------------|-----------------------|-------------------------------------------------------------------------------------------------------------------------------------------------------------------------------------------------------------------------------------------------------------------------------------------------------------------------------------------------------------------------------------------------------------------------------------------------------------------------------------------------------------------------------------------------------------------------------------------------------------------------------------------------------------------------------------------------------------------------------------------------------------------------------------------------------------------|----|

|            |                                    |         |          |                       |                       |                       |                                                                                                                                                                                                                                                                                                                                                                                                                                                                                                                                                                                                                                                                                                                                                                                     |    |
|------------|------------------------------------|---------|----------|-----------------------|-----------------------|-----------------------|-------------------------------------------------------------------------------------------------------------------------------------------------------------------------------------------------------------------------------------------------------------------------------------------------------------------------------------------------------------------------------------------------------------------------------------------------------------------------------------------------------------------------------------------------------------------------------------------------------------------------------------------------------------------------------------------------------------------------------------------------------------------------------------|----|
| GO:0071353 | cellular response to interleukin-4 | 12/2626 | 25/33142 | $1.17 \times 10^{-7}$ | $4.60 \times 10^{-6}$ | $3.44 \times 10^{-6}$ | 84830_c0_g1/TRINITY_DN13011_c0_g1/TRINITY_DN7054_c0_g1/TRINITY_DN9935_c1_g1/TRINITY_DN9041_c0_g1/TRINITY_DN6910_c0_g1/TRINITY_DN2869_c2_g1/TRINITY_DN2938_c3_g1/TRINITY_DN15420_c0_g1/TRINITY_DN7200_c0_g2/TRINITY_DN7523_c0_g1/TRINITY_DN9041_c0_g2/TRINITY_DN12650_c0_g1/TRINITY_DN428_c0_g1/TRINITY_DN4000_c0_g2/TRINITY_DN6505_c0_g1/TRINITY_DN49433_c0_g1/TRINITY_DN21399_c0_g1<br>TRINITY_DN19001_c0_g1/TRINITY_DN23921_c0_g1/TRINITY_DN482_c1_g1/TRINITY_DN29856_c0_g1/TRINITY_DN1549_c0_g1/TRINITY_DN40503_c0_g1/TRINITY_DN4137_c2_g1/TRINITY_DN40189_c0_g1/TRINITY_DN484_c0_g1/TRINITY_DN244_c3_g1/TRINITY_DN5788_c1_g1/TRINITY_DN61025_c0_g1<br>TRINITY_DN3991_c0_g1/TRINITY_DN7384_c0_g1/TRINITY_DN1557_c0_g1/TRINITY_DN5216_c1_g1/TRINITY_DN42262_c0_g1/TRINITY_DN3007_ | 12 |
| GO:0032496 | response to lipopolysaccharide     | 15/2626 | 39/33142 | $1.18 \times 10^{-7}$ | $4.60 \times 10^{-6}$ | $3.44 \times 10^{-6}$ |                                                                                                                                                                                                                                                                                                                                                                                                                                                                                                                                                                                                                                                                                                                                                                                     | 15 |



|            |                                           |         |           |                       |                       |                       |                                                                                                                                                                                                                                                                                                                                                                                                                                                                                                                                                                                                                                                                                                                                                                                                            |    |
|------------|-------------------------------------------|---------|-----------|-----------------------|-----------------------|-----------------------|------------------------------------------------------------------------------------------------------------------------------------------------------------------------------------------------------------------------------------------------------------------------------------------------------------------------------------------------------------------------------------------------------------------------------------------------------------------------------------------------------------------------------------------------------------------------------------------------------------------------------------------------------------------------------------------------------------------------------------------------------------------------------------------------------------|----|
| GO:0015697 | quaternary ammonium group transport       | 9/2626  | 14/33142  | $1.68 \times 10^{-7}$ | $6.26 \times 10^{-6}$ | $4.68 \times 10^{-6}$ | ITY_DN9041_c0_g2/TRINITY_DN1071_c0_g1<br>TRINITY_DN2006_c0_g1/TRINITY_DN2770_c0_g1/TRINITY_DN1478_c1_g3/TRINITY_DN14468_c0_g1/TRINITY_DN10811_c0_g1/TRINITY_DN10798_c0_g1/TRINITY_DN11056_c1_g1/TRINITY_DN11061_c0_g2/TRINITY_DN216_c0_g3<br>TRINITY_DN6657_c0_g1/TRINITY_DN19725_c0_g1/TRINITY_DN11686_c1_g1/TRINITY_DN7740_c0_g1/TRINITY_DN1979_c0_g2/TRINITY_DN6610_c0_g1/TRINITY_DN2725_c0_g1/TRINITY_DN59259_c0_g1/TRINITY_DN63431_c0_g1<br>TRINITY_DN9767_c0_g3/TRINITY_DN29267_c0_g2/TRINITY_DN37845_c0_g1/TRINITY_DN23921_c0_g1/TRINITY_DN1549_c0_g1/TRINITY_DN484_c0_g1/TRINITY_DN244_c3_g1/TRINITY_DN61025_c0_g1<br>TRINITY_DN21399_c0_g2/TRINITY_DN8323_c0_g1/TRINITY_DN3446_c0_g1/TRINITY_DN3245_c0_g1/TRINITY_DN1487_c0_g2/TRINITY_DN205_c0_g1/TRINITY_DN1557_c0_g1/TRINITY_DN16186_c0_g1/TRI | 9  |
| GO:0060294 | cilium movement involved in cell motility | 9/2626  | 14/33142  | $1.68 \times 10^{-7}$ | $6.26 \times 10^{-6}$ | $4.68 \times 10^{-6}$ |                                                                                                                                                                                                                                                                                                                                                                                                                                                                                                                                                                                                                                                                                                                                                                                                            | 9  |
| GO:0048468 | cell development                          | 8/2626  | 11/33142  | $2.04 \times 10^{-7}$ | $7.41 \times 10^{-6}$ | $5.55 \times 10^{-6}$ |                                                                                                                                                                                                                                                                                                                                                                                                                                                                                                                                                                                                                                                                                                                                                                                                            | 8  |
| GO:0043025 | neuronal cell body                        | 43/2626 | 235/33142 | $2.05 \times 10^{-7}$ | $7.41 \times 10^{-6}$ | $5.55 \times 10^{-6}$ |                                                                                                                                                                                                                                                                                                                                                                                                                                                                                                                                                                                                                                                                                                                                                                                                            | 43 |

NITY\_DN30087\_c1\_g2/TRINI  
TY\_DN13394\_c0\_g1/TRINITY  
\_DN200\_c0\_g2/TRINITY\_DN1  
7663\_c0\_g1/TRINITY\_DN5781  
\_c0\_g1/TRINITY\_DN15030\_c0  
\_g2/TRINITY\_DN7131\_c0\_g1/  
TRINITY\_DN8012\_c0\_g1/TRI  
NITY\_DN3816\_c0\_g1/TRINIT  
Y\_DN800\_c0\_g2/TRINITY\_D  
N4620\_c0\_g1/TRINITY\_DN36  
65\_c0\_g1/TRINITY\_DN9175\_c  
0\_g1/TRINITY\_DN8599\_c1\_g1  
/TRINITY\_DN9935\_c1\_g1/TRI  
NITY\_DN93\_c0\_g1/TRINITY\_  
DN2746\_c0\_g1/TRINITY\_DN2  
165\_c3\_g1/TRINITY\_DN58254  
\_c0\_g1/TRINITY\_DN9158\_c3\_  
g1/TRINITY\_DN14953\_c0\_g3/  
TRINITY\_DN709\_c0\_g1/TRIN  
ITY\_DN15420\_c0\_g1/TRINITY  
\_DN7200\_c0\_g2/TRINITY\_DN  
11061\_c0\_g2/TRINITY\_DN126  
50\_c0\_g1/TRINITY\_DN44537\_  
c0\_g1/TRINITY\_DN16530\_c0\_  
g1/TRINITY\_DN1186\_c0\_g1/T  
RINITY\_DN35025\_c0\_g1/TRI  
NITY\_DN1908\_c0\_g1/TRINIT  
Y\_DN2961\_c0\_g1/TRINITY\_D  
N6505\_c0\_g1/TRINITY\_DN26  
727\_c0\_g1/TRINITY\_DN16754  
\_c0\_g1

|            |                                          |         |           |                       |                       |                       |                                                                                                                                                                                                                                                                                                                                                                                                                                                                                                                                                                                                                                                                                                                                                                                                                  |    |
|------------|------------------------------------------|---------|-----------|-----------------------|-----------------------|-----------------------|------------------------------------------------------------------------------------------------------------------------------------------------------------------------------------------------------------------------------------------------------------------------------------------------------------------------------------------------------------------------------------------------------------------------------------------------------------------------------------------------------------------------------------------------------------------------------------------------------------------------------------------------------------------------------------------------------------------------------------------------------------------------------------------------------------------|----|
| GO:0062023 | collagen-containing extracellular matrix | 22/2626 | 81/33142  | $2.07 \times 10^{-7}$ | $7.41 \times 10^{-6}$ | $5.55 \times 10^{-6}$ | TRINITY_DN12244_c0_g1/TRINITY_DN5310_c0_g2/TRINITY_DN72971_c0_g1/TRINITY_DN6305_c1_g1/TRINITY_DN5613_c1_g1/TRINITY_DN2738_c0_g1/TRINITY_DN1533_c0_g2/TRINITY_DN1120_c0_g2/TRINITY_DN8217_c0_g1/TRINITY_DN636_c0_g1/TRINITY_DN4826_c1_g1/TRINITY_DN740_c0_g1/TRINITY_DN1902_c0_g1/TRINITY_DN2598_c0_g2/TRINITY_DN2868_c0_g1/TRINITY_DN35269_c0_g1/TRINITY_DN7326_c0_g1/TRINITY_DN9853_c0_g1/TRINITY_DN56782_c0_g1/TRINITY_DN2281_c0_g1/TRINITY_DN5908_c0_g1/TRINITY_DN4326_c0_g1/TRINITY_DN12244_c0_g1/TRINITY_DN3245_c0_g1/TRINITY_DN1487_c0_g2/TRINITY_DN3120_c0_g1/TRINITY_DN1695_c0_g1/TRINITY_DN17581_c0_g1/TRINITY_DN52390_c0_g1/TRINITY_DN4097_c0_g1/TRINITY_DN5176_c0_g1/TRINITY_DN1313_c0_g2/TRINITY_DN5680_c0_g1/TRINITY_DN2531_c0_g1/TRINITY_DN5951_c0_g4/TRINITY_DN3284_c0_g1/TRINITY_DN306_c1_g2/TRI | 22 |
| GO:0007399 | nervous system development               | 35/2626 | 173/33142 | $2.28 \times 10^{-7}$ | $7.98 \times 10^{-6}$ | $5.97 \times 10^{-6}$ |                                                                                                                                                                                                                                                                                                                                                                                                                                                                                                                                                                                                                                                                                                                                                                                                                  | 35 |

|            |                                                                           |         |          |                       |                       |                       |                                                                                                                                                                                                                                                                                                                                                                                                                                                                                                                                                                                                                                                                                                                                                                                                              |    |
|------------|---------------------------------------------------------------------------|---------|----------|-----------------------|-----------------------|-----------------------|--------------------------------------------------------------------------------------------------------------------------------------------------------------------------------------------------------------------------------------------------------------------------------------------------------------------------------------------------------------------------------------------------------------------------------------------------------------------------------------------------------------------------------------------------------------------------------------------------------------------------------------------------------------------------------------------------------------------------------------------------------------------------------------------------------------|----|
| GO:0005330 | dopamine:sodium symporter activity                                        | 10/2626 | 18/33142 | $2.32 \times 10^{-7}$ | $7.98 \times 10^{-6}$ | $5.97 \times 10^{-6}$ | NITY_DN8607_c0_g1/TRINITY_DN8681_c0_g1/TRINITY_DN130_c0_g1/TRINITY_DN23750_c0_g1/TRINITY_DN5276_c1_g1/TRINITY_DN10575_c2_g1/TRINITY_DN716_c0_g1/TRINITY_DN5362_c0_g1/TRINITY_DN3333_c0_g1/TRINITY_DN7006_c0_g1/TRINITY_DN3636_c0_g3/TRINITY_DN3636_c0_g4/TRINITY_DN7687_c0_g1/TRINITY_DN435_c2_g1/TRINITY_DN9041_c0_g2/TRINITY_DN1436_c1_g1/TRINITY_DN61_c0_g1/TRINITY_DN8449_c0_g1/TRINITY_DN29720_c0_g2/TRINITY_DN21399_c0_g1/TRINITY_DN2006_c0_g1/TRINITY_DN18454_c0_g1/TRINITY_DN5871_c1_g1/TRINITY_DN1478_c1_g3/TRINITY_DN14468_c0_g1/TRINITY_DN10811_c0_g1/TRINITY_DN10798_c0_g1/TRINITY_DN11056_c1_g1/TRINITY_DN11061_c0_g2/TRINITY_DN24632_c0_g1/TRINITY_DN72971_c0_g1/TRINITY_DN20653_c0_g1/TRINITY_DN4826_c1_g1/TRINITY_DN22381_c0_g1/TRINITY_DN31435_c0_g1/TRINITY_DN6839_c2_g1/TRINITY_DN3032_c1 | 10 |
| GO:0007193 | adenylate cyclase-inhibiting G protein-coupled receptor signaling pathway | 10/2626 | 18/33142 | $2.32 \times 10^{-7}$ | $7.98 \times 10^{-6}$ | $5.97 \times 10^{-6}$ | NITY_DN8607_c0_g1/TRINITY_DN8681_c0_g1/TRINITY_DN130_c0_g1/TRINITY_DN23750_c0_g1/TRINITY_DN5276_c1_g1/TRINITY_DN10575_c2_g1/TRINITY_DN716_c0_g1/TRINITY_DN5362_c0_g1/TRINITY_DN3333_c0_g1/TRINITY_DN7006_c0_g1/TRINITY_DN3636_c0_g3/TRINITY_DN3636_c0_g4/TRINITY_DN7687_c0_g1/TRINITY_DN435_c2_g1/TRINITY_DN9041_c0_g2/TRINITY_DN1436_c1_g1/TRINITY_DN61_c0_g1/TRINITY_DN8449_c0_g1/TRINITY_DN29720_c0_g2/TRINITY_DN21399_c0_g1/TRINITY_DN2006_c0_g1/TRINITY_DN18454_c0_g1/TRINITY_DN5871_c1_g1/TRINITY_DN1478_c1_g3/TRINITY_DN14468_c0_g1/TRINITY_DN10811_c0_g1/TRINITY_DN10798_c0_g1/TRINITY_DN11056_c1_g1/TRINITY_DN11061_c0_g2/TRINITY_DN24632_c0_g1/TRINITY_DN72971_c0_g1/TRINITY_DN20653_c0_g1/TRINITY_DN4826_c1_g1/TRINITY_DN22381_c0_g1/TRINITY_DN31435_c0_g1/TRINITY_DN6839_c2_g1/TRINITY_DN3032_c1 | 10 |



|            |                                                   |         |          |                       |                       |                       |                                                                                                                                                                                                                                                                                                                                                                                                                                                                                                                                                                                                                                                                                                                                                                                                      |    |
|------------|---------------------------------------------------|---------|----------|-----------------------|-----------------------|-----------------------|------------------------------------------------------------------------------------------------------------------------------------------------------------------------------------------------------------------------------------------------------------------------------------------------------------------------------------------------------------------------------------------------------------------------------------------------------------------------------------------------------------------------------------------------------------------------------------------------------------------------------------------------------------------------------------------------------------------------------------------------------------------------------------------------------|----|
| GO:0015101 | organic cation transmembrane transporter activity | 11/2626 | 22/33142 | $2.35 \times 10^{-7}$ | $7.98 \times 10^{-6}$ | $5.97 \times 10^{-6}$ | _g2/TRINITY_DN12650_c0_g1<br>/TRINITY_DN43641_c0_g1/TRINITY_DN10344_c0_g1<br>TRINITY_DN2006_c0_g1/TRINITY_DN5871_c1_g1/TRINITY_DN19520_c0_g1/TRINITY_DN1478_c1_g3/TRINITY_DN14468_c0_g1/TRINITY_DN10811_c0_g1/TRINITY_DN10798_c0_g1/TRINITY_DN11056_c1_g1/TRINITY_DN11061_c0_g2/TRINITY_DN24632_c0_g1/TRINITY_DN8729_c1_g1<br>TRINITY_DN5613_c1_g1/TRINITY_DN6082_c1_g2/TRINITY_DN16500_c1_g1/TRINITY_DN4861_c0_g1/TRINITY_DN3123_c0_g1/TRINITY_DN4603_c1_g1/TRINITY_DN1510_c0_g1/TRINITY_DN10648_c0_g1/TRINITY_DN3717_c0_g1/TRINITY_DN7326_c0_g1/TRINITY_DN56782_c0_g1/TRINITY_DN14093_c0_g1<br>TRINITY_DN7953_c1_g1/TRINITY_DN1015_c0_g2/TRINITY_DN39639_c3_g1/TRINITY_DN30262_c0_g1/TRINITY_DN7051_c0_g1/TRINITY_DN2378_c0_g1/TRINITY_DN5861_c0_g1/TRINITY_DN8848_c0_g1/TRINITY_DN3614_c1_g1/TRIN | 11 |
| GO:0010951 | negative regulation of endopeptidase activity     | 12/2626 | 27/33142 | $3.36 \times 10^{-7}$ | $1.13 \times 10^{-5}$ | $8.45 \times 10^{-6}$ |                                                                                                                                                                                                                                                                                                                                                                                                                                                                                                                                                                                                                                                                                                                                                                                                      | 12 |
| GO:0042594 | response to starvation                            | 21/2626 | 77/33142 | $3.61 \times 10^{-7}$ | $1.20 \times 10^{-5}$ | $8.98 \times 10^{-6}$ |                                                                                                                                                                                                                                                                                                                                                                                                                                                                                                                                                                                                                                                                                                                                                                                                      | 21 |

|            |                                                                 |         |          |                       |                       |                       |                                                                                                                                                                                                                                                                                                                                                                                                                                                                                                                                                                                                                                                                                                                                                                 |    |
|------------|-----------------------------------------------------------------|---------|----------|-----------------------|-----------------------|-----------------------|-----------------------------------------------------------------------------------------------------------------------------------------------------------------------------------------------------------------------------------------------------------------------------------------------------------------------------------------------------------------------------------------------------------------------------------------------------------------------------------------------------------------------------------------------------------------------------------------------------------------------------------------------------------------------------------------------------------------------------------------------------------------|----|
| GO:0007156 | homophilic cell adhesion via plasma membrane adhesion molecules | 23/2626 | 90/33142 | $3.68 \times 10^{-7}$ | $1.21 \times 10^{-5}$ | $9.04 \times 10^{-6}$ | ITY_DN974_c0_g1/TRINITY_DN1486_c0_g1/TRINITY_DN2852_c0_g1/TRINITY_DN346_c0_g1/TRINITY_DN4859_c0_g1/TRINITY_DN9642_c1_g2/TRINITY_DN3032_c1_g2/TRINITY_DN9521_c0_g2/TRINITY_DN15536_c0_g1/TRINITY_DN43262_c0_g1/TRINITY_DN27661_c0_g1/TRINITY_DN864_c0_g3<br>TRINITY_DN5310_c0_g2/TRINITY_DN7785_c0_g1/TRINITY_DN6331_c0_g1/TRINITY_DN2244_c1_g1/TRINITY_DN6174_c0_g1/TRINITY_DN1990_c0_g1/TRINITY_DN9219_c0_g1/TRINITY_DN1120_c0_g2/TRINITY_DN2868_c0_g2/TRINITY_DN6076_c0_g1/TRINITY_DN6348_c0_g1/TRINITY_DN8217_c1_g1/TRINITY_DN43399_c0_g1/TRINITY_DN7898_c0_g1/TRINITY_DN27045_c0_g1/TRINITY_DN2475_c0_g1/TRINITY_DN12452_c0_g1/TRINITY_DN9158_c3_g1/TRINITY_DN446_c1_g1/TRINITY_DN709_c0_g1/TRINITY_DN2321_c0_g1/TRINITY_DN1941_c0_g1/TRINITY_DN13354_c0_g1 | 23 |
|------------|-----------------------------------------------------------------|---------|----------|-----------------------|-----------------------|-----------------------|-----------------------------------------------------------------------------------------------------------------------------------------------------------------------------------------------------------------------------------------------------------------------------------------------------------------------------------------------------------------------------------------------------------------------------------------------------------------------------------------------------------------------------------------------------------------------------------------------------------------------------------------------------------------------------------------------------------------------------------------------------------------|----|

|            |                             |         |          |                       |                       |                       |                                                                                                                                                                                                                                                                                                                                                                                                                                                                                                                                                                                                                                                                                                                                                                                   |    |
|------------|-----------------------------|---------|----------|-----------------------|-----------------------|-----------------------|-----------------------------------------------------------------------------------------------------------------------------------------------------------------------------------------------------------------------------------------------------------------------------------------------------------------------------------------------------------------------------------------------------------------------------------------------------------------------------------------------------------------------------------------------------------------------------------------------------------------------------------------------------------------------------------------------------------------------------------------------------------------------------------|----|
| GO:0008066 | glutamate receptor activity | 10/2626 | 19/33142 | $4.54 \times 10^{-7}$ | $1.46 \times 10^{-5}$ | $1.09 \times 10^{-5}$ | TRINITY_DN21399_c0_g2/TRINITY_DN16006_c0_g1/TRINITY_DN8355_c0_g1/TRINITY_DN1765_c2_g1/TRINITY_DN3816_c0_g1/TRINITY_DN9041_c0_g1/TRINITY_DN7200_c0_g2/TRINITY_DN9041_c0_g2/TRINITY_DN49433_c0_g1/TRINITY_DN21399_c0_g1<br>TRINITY_DN19001_c0_g1/TRINITY_DN23921_c0_g1/TRINITY_DN482_c1_g1/TRINITY_DN29856_c0_g1/TRINITY_DN1549_c0_g1/TRINITY_DN40189_c0_g1/TRINITY_DN484_c0_g1/TRINITY_DN10344_c0_g1/TRINITY_DN244_c3_g1/TRINITY_DN61025_c0_g1<br>TRINITY_DN72971_c0_g1/TRINITY_DN834_c1_g1/TRINITY_DN7048_c0_g1/TRINITY_DN15486_c0_g2/TRINITY_DN23953_c0_g1/TRINITY_DN4826_c1_g1/TRINITY_DN8977_c0_g1/TRINITY_DN9755_c0_g1/TRINITY_DN11938_c0_g1/TRINITY_DN656_c0_g1/TRINITY_DN9853_c0_g1/TRINITY_DN4859_c0_g1/TRINITY_DN10575_c2_g1/TRINITY_DN3890_c0_g1/TRINITY_DN43641_c0_g1/T | 10 |
| GO:0030224 | monocyte differentiation    | 10/2626 | 19/33142 | $4.54 \times 10^{-7}$ | $1.46 \times 10^{-5}$ | $1.09 \times 10^{-5}$ | TRINITY_DN21399_c0_g2/TRINITY_DN16006_c0_g1/TRINITY_DN8355_c0_g1/TRINITY_DN1765_c2_g1/TRINITY_DN3816_c0_g1/TRINITY_DN9041_c0_g1/TRINITY_DN7200_c0_g2/TRINITY_DN9041_c0_g2/TRINITY_DN49433_c0_g1/TRINITY_DN21399_c0_g1<br>TRINITY_DN19001_c0_g1/TRINITY_DN23921_c0_g1/TRINITY_DN482_c1_g1/TRINITY_DN29856_c0_g1/TRINITY_DN1549_c0_g1/TRINITY_DN40189_c0_g1/TRINITY_DN484_c0_g1/TRINITY_DN10344_c0_g1/TRINITY_DN244_c3_g1/TRINITY_DN61025_c0_g1<br>TRINITY_DN72971_c0_g1/TRINITY_DN834_c1_g1/TRINITY_DN7048_c0_g1/TRINITY_DN15486_c0_g2/TRINITY_DN23953_c0_g1/TRINITY_DN4826_c1_g1/TRINITY_DN8977_c0_g1/TRINITY_DN9755_c0_g1/TRINITY_DN11938_c0_g1/TRINITY_DN656_c0_g1/TRINITY_DN9853_c0_g1/TRINITY_DN4859_c0_g1/TRINITY_DN10575_c2_g1/TRINITY_DN3890_c0_g1/TRINITY_DN43641_c0_g1/T | 10 |
| GO:0005543 | phospholipid binding        | 17/2626 | 54/33142 | $4.99 \times 10^{-7}$ | $1.58 \times 10^{-5}$ | $1.18 \times 10^{-5}$ | TRINITY_DN21399_c0_g2/TRINITY_DN16006_c0_g1/TRINITY_DN8355_c0_g1/TRINITY_DN1765_c2_g1/TRINITY_DN3816_c0_g1/TRINITY_DN9041_c0_g1/TRINITY_DN7200_c0_g2/TRINITY_DN9041_c0_g2/TRINITY_DN49433_c0_g1/TRINITY_DN21399_c0_g1<br>TRINITY_DN19001_c0_g1/TRINITY_DN23921_c0_g1/TRINITY_DN482_c1_g1/TRINITY_DN29856_c0_g1/TRINITY_DN1549_c0_g1/TRINITY_DN40189_c0_g1/TRINITY_DN484_c0_g1/TRINITY_DN10344_c0_g1/TRINITY_DN244_c3_g1/TRINITY_DN61025_c0_g1<br>TRINITY_DN72971_c0_g1/TRINITY_DN834_c1_g1/TRINITY_DN7048_c0_g1/TRINITY_DN15486_c0_g2/TRINITY_DN23953_c0_g1/TRINITY_DN4826_c1_g1/TRINITY_DN8977_c0_g1/TRINITY_DN9755_c0_g1/TRINITY_DN11938_c0_g1/TRINITY_DN656_c0_g1/TRINITY_DN9853_c0_g1/TRINITY_DN4859_c0_g1/TRINITY_DN10575_c2_g1/TRINITY_DN3890_c0_g1/TRINITY_DN43641_c0_g1/T | 17 |

| GO ID      | Biological Process                   | Count   | Total     | Ratio                 | Ratio                 | Ratio                 | Gene IDs                                                                                                                                                                                                                                                                                                                                                                                                                                                                                                                                                                                                                                                                                                                                                                                  | Count |
|------------|--------------------------------------|---------|-----------|-----------------------|-----------------------|-----------------------|-------------------------------------------------------------------------------------------------------------------------------------------------------------------------------------------------------------------------------------------------------------------------------------------------------------------------------------------------------------------------------------------------------------------------------------------------------------------------------------------------------------------------------------------------------------------------------------------------------------------------------------------------------------------------------------------------------------------------------------------------------------------------------------------|-------|
| GO:0007215 | glutamate receptor signaling pathway | 8/2626  | 12/33142  | $5.69 \times 10^{-7}$ | $1.77 \times 10^{-5}$ | $1.32 \times 10^{-5}$ | RINITY_DN6505_c0_g1/TRINITY_DN17100_c0_g1<br>TRINITY_DN21399_c0_g2/TRINITY_DN8355_c0_g1/TRINITY_DN1765_c2_g1/TRINITY_DN9041_c0_g1/TRINITY_DN55372_c0_g1/TRINITY_DN7200_c0_g2/TRINITY_DN9041_c0_g2/TRINITY_DN21399_c0_g1/TRINITY_DN7740_c0_g1/TRINITY_DN5006_c0_g2/TRINITY_DN7530_c0_g1/TRINITY_DN2153_c0_g1/TRINITY_DN15544_c0_g1/TRINITY_DN4533_c4_g1/TRINITY_DN59259_c0_g1/TRINITY_DN63431_c0_g1/TRINITY_DN32009_c0_g1/TRINITY_DN11954_c0_g1/TRINITY_DN1568_c0_g1/TRINITY_DN406_c0_g3/TRINITY_DN7743_c0_g1/TRINITY_DN5049_c0_g1/TRINITY_DN2999_c0_g1/TRINITY_DN3713_c1_g1/TRINITY_DN6037_c0_g1/TRINITY_DN406_c0_g2/TRINITY_DN15324_c1_g1/TRINITY_DN6985_c0_g1/TRINITY_DN42565_c0_g1<br>TRINITY_DN2677_c0_g1/TRINITY_DN2639_c0_g1/TRINITY_DN9943_c0_g1/TRINITY_DN2841_c0_g1/TRINITY_DN59 | 8     |
| GO:0035082 | axoneme assembly                     | 8/2626  | 12/33142  | $5.69 \times 10^{-7}$ | $1.77 \times 10^{-5}$ | $1.32 \times 10^{-5}$ |                                                                                                                                                                                                                                                                                                                                                                                                                                                                                                                                                                                                                                                                                                                                                                                           | 8     |
| GO:0014070 | response to organic cyclic compound  | 13/2626 | 33/33142  | $5.95 \times 10^{-7}$ | $1.82 \times 10^{-5}$ | $1.37 \times 10^{-5}$ |                                                                                                                                                                                                                                                                                                                                                                                                                                                                                                                                                                                                                                                                                                                                                                                           | 13    |
| GO:0007275 | multicellular organism development   | 58/2626 | 373/33142 | $6.14 \times 10^{-7}$ | $1.86 \times 10^{-5}$ | $1.40 \times 10^{-5}$ |                                                                                                                                                                                                                                                                                                                                                                                                                                                                                                                                                                                                                                                                                                                                                                                           | 58    |



02\_c1\_g1/TRINITY\_DN11509\_c0\_g1/TRINITY\_DN8299\_c0\_g1/TRINITY\_DN9643\_c0\_g1/TRINITY\_DN2276\_c0\_g1/TRINITY\_DN15863\_c0\_g1/TRINITY\_DN5878\_c0\_g1/TRINITY\_DN2648\_c0\_g1/TRINITY\_DN5239\_c1\_g2/TRINITY\_DN7756\_c0\_g1/TRINITY\_DN5049\_c0\_g1/TRINITY\_DN2778\_c0\_g3/TRINITY\_DN3090\_c1\_g1/TRINITY\_DN17487\_c0\_g1/TRINITY\_DN21912\_c0\_g1/TRINITY\_DN4811\_c0\_g1/TRINITY\_DN2999\_c0\_g1/TRINITY\_DN35198\_c0\_g1/TRINITY\_DN6323\_c1\_g1/TRINITY\_DN6222\_c0\_g1/TRINITY\_DN10609\_c0\_g1/TRINITY\_DN16331\_c0\_g1/TRINITY\_DN5327\_c0\_g1/TRINITY\_DN9233\_c0\_g1/TRINITY\_DN8796\_c0\_g1/TRINITY\_DN85\_c0\_g1/TRINITY\_DN7744\_c0\_g1/TRINITY\_DN12886\_c0\_g1/TRINITY\_DN49948\_c0\_g1/TRINITY\_DN5875\_c0\_g1/TRINITY\_DN2615\_c0\_g2/TRINITY\_DN4173\_c0\_g1/TRINITY\_DN3180\_c0\_g1/TRINITY\_DN9676\_c0\_g1/TRINITY\_DN18049\_c0\_g1/TRINITY\_DN1998\_c0\_g1/TRINITY\_DN3058\_c0\_g1/TRINITY\_DN7512

|            |                     |         |          |                       |                       |                       |                                                                                                                                                                                                                                                                                                                                                                                                                                                                                                                                                                                                                                                                                                                                                                                           |    |
|------------|---------------------|---------|----------|-----------------------|-----------------------|-----------------------|-------------------------------------------------------------------------------------------------------------------------------------------------------------------------------------------------------------------------------------------------------------------------------------------------------------------------------------------------------------------------------------------------------------------------------------------------------------------------------------------------------------------------------------------------------------------------------------------------------------------------------------------------------------------------------------------------------------------------------------------------------------------------------------------|----|
| GO:0015771 | trehalose transport | 19/2626 | 67/33142 | $6.67 \times 10^{-7}$ | $2.00 \times 10^{-5}$ | $1.50 \times 10^{-5}$ | _c0_g1/TRINITY_DN39858_c0_g1/TRINITY_DN12402_c0_g1/TRINITY_DN25570_c0_g1/TRINITY_DN4005_c0_g1/TRINITY_DN77356_c0_g1/TRINITY_DN12133_c0_g1/TRINITY_DN34504_c0_g1/TRINITY_DN33662_c0_g1/TRINITY_DN51821_c0_g1/TRINITY_DN4963_c0_g1/TRINITY_DN3459_c0_g1/TRINITY_DN6230_c4_g1/TRINITY_DN3241_c0_g1/TRINITY_DN30782_c0_g2/TRINITY_DN9055_c0_g2/TRINITY_DN674_c2_g1<br>TRINITY_DN15648_c3_g1/TRINITY_DN950_c2_g2/TRINITY_DN24938_c0_g1/TRINITY_DN15759_c0_g1/TRINITY_DN27949_c0_g1/TRINITY_DN33728_c0_g1/TRINITY_DN2995_c1_g1/TRINITY_DN8156_c0_g1/TRINITY_DN39203_c0_g2/TRINITY_DN27227_c0_g1/TRINITY_DN59776_c0_g1/TRINITY_DN20880_c0_g1/TRINITY_DN27273_c0_g1/TRINITY_DN6365_c0_g1/TRINITY_DN4204_c3_g1/TRINITY_DN34_c4_g1/TRINITY_DN6567_c0_g1/TRINITY_DN13085_c0_g1/TRINITY_DN11476_c0_g1 | 19 |
|------------|---------------------|---------|----------|-----------------------|-----------------------|-----------------------|-------------------------------------------------------------------------------------------------------------------------------------------------------------------------------------------------------------------------------------------------------------------------------------------------------------------------------------------------------------------------------------------------------------------------------------------------------------------------------------------------------------------------------------------------------------------------------------------------------------------------------------------------------------------------------------------------------------------------------------------------------------------------------------------|----|

|            |                               |         |           |                       |                       |                       |                                                                                                                                                                                                                                                                                                                                                                                                                                                                                                                                                                                                                                                                                                                                                                                                         |    |
|------------|-------------------------------|---------|-----------|-----------------------|-----------------------|-----------------------|---------------------------------------------------------------------------------------------------------------------------------------------------------------------------------------------------------------------------------------------------------------------------------------------------------------------------------------------------------------------------------------------------------------------------------------------------------------------------------------------------------------------------------------------------------------------------------------------------------------------------------------------------------------------------------------------------------------------------------------------------------------------------------------------------------|----|
| GO:0042632 | cholesterol homeostasis       | 15/2626 | 44/33142  | $7.36 \times 10^{-7}$ | $2.19 \times 10^{-5}$ | $1.64 \times 10^{-5}$ | TRINITY_DN1568_c0_g1/TRINITY_DN5364_c0_g1/TRINITY_DN7048_c0_g1/TRINITY_DN5086_c0_g1/TRINITY_DN5278_c0_g1/TRINITY_DN10757_c0_g1/TRINITY_DN7045_c1_g1/TRINITY_DN9063_c0_g1/TRINITY_DN40503_c0_g1/TRINITY_DN26376_c0_g1/TRINITY_DN489_c1_g1/TRINITY_DN4137_c2_g1/TRINITY_DN333_c0_g1/TRINITY_DN38748_c0_g1/TRINITY_DN8292_c0_g1/TRINITY_DN21399_c0_g2/TRINITY_DN8355_c0_g1/TRINITY_DN1765_c2_g1/TRINITY_DN3816_c0_g1/TRINITY_DN9041_c0_g1/TRINITY_DN7200_c0_g2/TRINITY_DN9041_c0_g2/TRINITY_DN9730_c0_g1/TRINITY_DN6505_c0_g1/TRINITY_DN3991_c0_g1/TRINITY_DN7437_c0_g1/TRINITY_DN21789_c0_g1/TRINITY_DN219_c3_g1/TRINITY_DN1990_c0_g1/TRINITY_DN5878_c0_g1/TRINITY_DN1266_c0_g1/TRINITY_DN2428_c0_g1/TRINITY_DN3296_c0_g1/TRINITY_DN19324_c0_g1/TRINITY_DN8903_c0_g1/TRINITY_DN2557_c0_g2/TRINITY_DN85_c0 | 15 |
| GO:0032839 | dendrite cytoplasm            | 9/2626  | 16/33142  | $8.31 \times 10^{-7}$ | $2.42 \times 10^{-5}$ | $1.81 \times 10^{-5}$ |                                                                                                                                                                                                                                                                                                                                                                                                                                                                                                                                                                                                                                                                                                                                                                                                         | 9  |
| GO:0008283 | cell population proliferation | 32/2626 | 159/33142 | $8.32 \times 10^{-7}$ | $2.42 \times 10^{-5}$ | $1.81 \times 10^{-5}$ |                                                                                                                                                                                                                                                                                                                                                                                                                                                                                                                                                                                                                                                                                                                                                                                                         | 32 |

|            |                                 |         |          |                       |                       |                       |                                                                                                                                                                                                                                                                                                                                                                                                                                                                                                                                                                                                                                                                                                                                                                                                                                                                                                                            |    |
|------------|---------------------------------|---------|----------|-----------------------|-----------------------|-----------------------|----------------------------------------------------------------------------------------------------------------------------------------------------------------------------------------------------------------------------------------------------------------------------------------------------------------------------------------------------------------------------------------------------------------------------------------------------------------------------------------------------------------------------------------------------------------------------------------------------------------------------------------------------------------------------------------------------------------------------------------------------------------------------------------------------------------------------------------------------------------------------------------------------------------------------|----|
| GO:0043170 | macromolecule metabolic process | 10/2626 | 20/33142 | $8.44 \times 10^{-7}$ | $2.43 \times 10^{-5}$ | $1.82 \times 10^{-5}$ | _g1/TRINITY_DN1541_c0_g1/<br>TRINITY_DN1902_c0_g1/TRI<br>NITY_DN2682_c0_g1/TRINIT<br>Y_DN13467_c0_g1/TRINITY_<br>DN1117_c1_g1/TRINITY_DN2<br>4147_c0_g1/TRINITY_DN8625<br>_c0_g1/TRINITY_DN13564_c0<br>_g1/TRINITY_DN9994_c0_g1/<br>TRINITY_DN15457_c0_g1/TRI<br>NITY_DN11156_c0_g5/TRINI<br>TY_DN1699_c1_g1/TRINITY_<br>DN4190_c0_g1/TRINITY_DN5<br>1821_c0_g1/TRINITY_DN2637<br>6_c0_g1/TRINITY_DN2281_c0<br>_g1/TRINITY_DN645_c0_g1/T<br>RINITY_DN4839_c0_g1/TRIN<br>ITY_DN7633_c0_g1<br>TRINITY_DN28084_c0_g1/TRI<br>NITY_DN19001_c0_g1/TRINI<br>TY_DN23921_c0_g1/TRINITY<br>_DN482_c1_g1/TRINITY_DN2<br>9856_c0_g1/TRINITY_DN1549<br>_c0_g1/TRINITY_DN40189_c0<br>_g1/TRINITY_DN484_c0_g1/T<br>RINITY_DN244_c3_g1/TRINI<br>TY_DN61025_c0_g1<br>TRINITY_DN6305_c1_g1/TRI<br>NITY_DN15240_c0_g1/TRINI<br>TY_DN7582_c0_g1/TRINITY_<br>DN6134_c0_g1/TRINITY_DN7<br>048_c0_g1/TRINITY_DN42941<br>_c0_g1/TRINITY_DN1120_c0_ | 10 |
| GO:0050896 | response to stimulus            | 19/2626 | 68/33142 | $8.57 \times 10^{-7}$ | $2.44 \times 10^{-5}$ | $1.83 \times 10^{-5}$ |                                                                                                                                                                                                                                                                                                                                                                                                                                                                                                                                                                                                                                                                                                                                                                                                                                                                                                                            | 19 |



|            |                            |         |          |                       |                       |                       |                                                                                                                                                                                                                                                                                                                                                                                                                                                                                                                                                                                                                                                                                                                                                                                         |    |
|------------|----------------------------|---------|----------|-----------------------|-----------------------|-----------------------|-----------------------------------------------------------------------------------------------------------------------------------------------------------------------------------------------------------------------------------------------------------------------------------------------------------------------------------------------------------------------------------------------------------------------------------------------------------------------------------------------------------------------------------------------------------------------------------------------------------------------------------------------------------------------------------------------------------------------------------------------------------------------------------------|----|
| GO:0005319 | lipid transporter activity | 13/2626 | 34/33142 | $8.93 \times 10^{-7}$ | $2.50 \times 10^{-5}$ | $1.87 \times 10^{-5}$ | g2/TRINITY_DN5198_c0_g1/TRINITY_DN2492_c0_g1/TRINITY_DN8217_c0_g1/TRINITY_DN2924_c1_g1/TRINITY_DN5459_c0_g1/TRINITY_DN2868_c0_g1/TRINITY_DN25570_c0_g1/TRINITY_DN5121_c0_g1/TRINITY_DN4264_c1_g1/TRINITY_DN61_c0_g1/TRINITY_DN4784_c1_g1/TRINITY_DN16662_c0_g1<br>TRINITY_DN11463_c0_g1/TRINITY_DN34083_c0_g1/TRINITY_DN60341_c0_g1/TRINITY_DN7425_c6_g1/TRINITY_DN12443_c0_g1/TRINITY_DN8493_c0_g1/TRINITY_DN7048_c0_g1/TRINITY_DN32249_c0_g1/TRINITY_DN5278_c0_g1/TRINITY_DN383_c0_g1/TRINITY_DN46257_c0_g1/TRINITY_DN7045_c1_g1/TRINITY_DN35596_c0_g1<br>TRINITY_DN9943_c0_g1/TRINITY_DN2841_c0_g1/TRINITY_DN23053_c0_g1/TRINITY_DN15863_c0_g1/TRINITY_DN4544_c0_g1/TRINITY_DN954_c0_g1/TRINITY_DN6380_c0_g1/TRINITY_DN9994_c0_g1/TRINITY_DN93_c0_g1/TRINITY_DN7067_c0_g1/TRINITY_DN | 13 |
| GO:0007286 | spermatid development      | 13/2626 | 34/33142 | $8.93 \times 10^{-7}$ | $2.50 \times 10^{-5}$ | $1.87 \times 10^{-5}$ |                                                                                                                                                                                                                                                                                                                                                                                                                                                                                                                                                                                                                                                                                                                                                                                         | 13 |

|            |                                                    |         |          |                       |                       |                       |                                                                                                                                                                                                                                                                                                                                                                                                                                                                                                                                                                                                                                                                                                                                                                                                          |    |
|------------|----------------------------------------------------|---------|----------|-----------------------|-----------------------|-----------------------|----------------------------------------------------------------------------------------------------------------------------------------------------------------------------------------------------------------------------------------------------------------------------------------------------------------------------------------------------------------------------------------------------------------------------------------------------------------------------------------------------------------------------------------------------------------------------------------------------------------------------------------------------------------------------------------------------------------------------------------------------------------------------------------------------------|----|
| GO:0016758 | transferase activity , transferring hexosyl groups | 20/2626 | 75/33142 | $1.01 \times 10^{-6}$ | $2.79 \times 10^{-5}$ | $2.09 \times 10^{-5}$ | 9809_c0_g3/TRINITY_DN686_c0_g2/TRINITY_DN39_c1_g2 TRINITY_DN32009_c0_g1/TRINITY_DN16979_c0_g1/TRINITY_DN11954_c0_g1/TRINITY_DN638_c0_g2/TRINITY_DN50797_c0_g3/TRINITY_DN23485_c0_g1/TRINITY_DN15702_c0_g2/TRINITY_DN15487_c0_g1/TRINITY_DN5087_c0_g1/TRINITY_DN10011_c0_g1/TRINITY_DN4160_c0_g1/TRINITY_DN10583_c0_g1/TRINITY_DN974_c0_g1/TRINITY_DN15702_c0_g4/TRINITY_DN15324_c1_g1/TRINITY_DN13235_c0_g1/TRINITY_DN13226_c0_g1/TRINITY_DN1200_c2_g1/TRINITY_DN8845_c0_g3/TRINITY_DN27558_c0_g1 TRINITY_DN15648_c3_g1/TRINITY_DN950_c2_g2/TRINITY_DN24938_c0_g1/TRINITY_DN15759_c0_g1/TRINITY_DN27949_c0_g1/TRINITY_DN33728_c0_g1/TRINITY_DN2995_c1_g1/TRINITY_DN39203_c0_g2/TRINITY_DN27227_c0_g1/TRINITY_DN59776_c0_g1/TRINITY_DN20880_c0_g1/TRINITY_DN27273_c0_g1/TRINITY_DN6365_c0_g1/TRINITY_DN42 | 20 |
| GO:0015574 | trehalose transmembrane transporter activity       | 18/2626 | 63/33142 | $1.16 \times 10^{-6}$ | $3.17 \times 10^{-5}$ | $2.37 \times 10^{-5}$ |                                                                                                                                                                                                                                                                                                                                                                                                                                                                                                                                                                                                                                                                                                                                                                                                          | 18 |

|            |                                            |         |          |                       |                       |                       |                                                                                                                                                                                                                                                                                                                                                                                                                                                                                                                                                                                                                                                                                                                                                                                             |    |
|------------|--------------------------------------------|---------|----------|-----------------------|-----------------------|-----------------------|---------------------------------------------------------------------------------------------------------------------------------------------------------------------------------------------------------------------------------------------------------------------------------------------------------------------------------------------------------------------------------------------------------------------------------------------------------------------------------------------------------------------------------------------------------------------------------------------------------------------------------------------------------------------------------------------------------------------------------------------------------------------------------------------|----|
| GO:0001822 | kidney development                         | 13/2626 | 35/33142 | $1.32 \times 10^{-6}$ | $3.58 \times 10^{-5}$ | $2.68 \times 10^{-5}$ | 04_c3_g1/TRINITY_DN34_c4_g1/TRINITY_DN6567_c0_g1/TRINITY_DN13085_c0_g1/TRINITY_DN11476_c0_g1/TRINITY_DN3991_c0_g1/TRINITY_DN950_c4_g1/TRINITY_DN5216_c1_g1/TRINITY_DN6886_c3_g1/TRINITY_DN3762_c0_g1/TRINITY_DN13406_c0_g1/TRINITY_DN306_c1_g2/TRINITY_DN2682_c0_g1/TRINITY_DN6745_c0_g1/TRINITY_DN9168_c0_g2/TRINITY_DN2011_c0_g1/TRINITY_DN52030_c0_g1/TRINITY_DN4416_c0_g1<br>g1<br>TRINITY_DN14689_c0_g1/TRINITY_DN2778_c1_g1/TRINITY_DN1229_c0_g2/TRINITY_DN55476_c0_g1/TRINITY_DN18821_c0_g1/TRINITY_DN70025_c0_g1/TRINITY_DN1229_c0_g4/TRINITY_DN1229_c0_g3/TRINITY_DN855_c0_g1/TRINITY_DN4947_c0_g1<br>TRINITY_DN33530_c0_g1/TRINITY_DN15601_c0_g3/TRINITY_DN945_c0_g1/TRINITY_DN6944_c0_g1/TRINITY_DN3487_c1_g1/TRINITY_DN10831_c0_g1/TRINITY_DN972_c0_g1/TRINITY_DN15618_c0_g1/TR | 13 |
| GO:0006583 | melanin biosynthetic process from tyrosine | 10/2626 | 21/33142 | $1.50 \times 10^{-6}$ | $3.99 \times 10^{-5}$ | $2.98 \times 10^{-5}$ |                                                                                                                                                                                                                                                                                                                                                                                                                                                                                                                                                                                                                                                                                                                                                                                             | 10 |
| GO:0019731 | antibacterial humoral response             | 10/2626 | 21/33142 | $1.50 \times 10^{-6}$ | $3.99 \times 10^{-5}$ | $2.98 \times 10^{-5}$ |                                                                                                                                                                                                                                                                                                                                                                                                                                                                                                                                                                                                                                                                                                                                                                                             | 10 |

|            |                                       |         |           |                       |                       |                       |                                                                                                                                                                                                                                                                                                                                                                                                                                                                                                                                                                                                                                                                                                                                                                                                                                                                                                                                 |    |
|------------|---------------------------------------|---------|-----------|-----------------------|-----------------------|-----------------------|---------------------------------------------------------------------------------------------------------------------------------------------------------------------------------------------------------------------------------------------------------------------------------------------------------------------------------------------------------------------------------------------------------------------------------------------------------------------------------------------------------------------------------------------------------------------------------------------------------------------------------------------------------------------------------------------------------------------------------------------------------------------------------------------------------------------------------------------------------------------------------------------------------------------------------|----|
| GO:0006464 | cellular protein modification process | 16/2626 | 52/33142  | $1.52 \times 10^{-6}$ | $3.99 \times 10^{-5}$ | $2.99 \times 10^{-5}$ | INITY_DN16383_c1_g1/TRINI<br>TY_DN15618_c0_g2<br>TRINITY_DN1936_c0_g1/TRI<br>NITY_DN879_c0_g2/TRINITY<br>_DN6049_c1_g2/TRINITY_DN<br>4759_c0_g1/TRINITY_DN3981<br>_c0_g1/TRINITY_DN9948_c0_<br>g1/TRINITY_DN2415_c2_g1/T<br>RINITY_DN16168_c0_g1/TRI<br>NITY_DN1406_c0_g1/TRINIT<br>Y_DN8866_c0_g1/TRINITY_D<br>N15133_c0_g1/TRINITY_DN4<br>89_c2_g1/TRINITY_DN9716_c<br>0_g1/TRINITY_DN15544_c0_g<br>1/TRINITY_DN21292_c0_g1/T<br>RINITY_DN7633_c0_g1<br>TRINITY_DN755_c2_g1/TRIN<br>ITY_DN3772_c0_g1/TRINITY_<br>DN6327_c1_g1/TRINITY_DN3<br>120_c0_g1/TRINITY_DN1557_<br>c0_g1/TRINITY_DN2279_c0_g<br>1/TRINITY_DN4385_c0_g1/TR<br>INITY_DN5086_c0_g1/TRINIT<br>Y_DN10707_c0_g1/TRINITY_<br>DN17487_c0_g1/TRINITY_DN<br>1169_c0_g1/TRINITY_DN6947<br>_c0_g1/TRINITY_DN7712_c0_<br>g1/TRINITY_DN36153_c0_g3/<br>TRINITY_DN14468_c0_g1/TRI<br>NITY_DN7744_c0_g1/TRINIT<br>Y_DN7659_c0_g1/TRINITY_D<br>N10783_c0_g1/TRINITY_DN1 | 16 |
| GO:0006915 | apoptotic process                     | 38/2626 | 211/33142 | $1.53 \times 10^{-6}$ | $3.99 \times 10^{-5}$ | $2.99 \times 10^{-5}$ | INITY_DN16383_c1_g1/TRINI<br>TY_DN15618_c0_g2<br>TRINITY_DN1936_c0_g1/TRI<br>NITY_DN879_c0_g2/TRINITY<br>_DN6049_c1_g2/TRINITY_DN<br>4759_c0_g1/TRINITY_DN3981<br>_c0_g1/TRINITY_DN9948_c0_<br>g1/TRINITY_DN2415_c2_g1/T<br>RINITY_DN16168_c0_g1/TRI<br>NITY_DN1406_c0_g1/TRINIT<br>Y_DN8866_c0_g1/TRINITY_D<br>N15133_c0_g1/TRINITY_DN4<br>89_c2_g1/TRINITY_DN9716_c<br>0_g1/TRINITY_DN15544_c0_g<br>1/TRINITY_DN21292_c0_g1/T<br>RINITY_DN7633_c0_g1<br>TRINITY_DN755_c2_g1/TRIN<br>ITY_DN3772_c0_g1/TRINITY_<br>DN6327_c1_g1/TRINITY_DN3<br>120_c0_g1/TRINITY_DN1557_<br>c0_g1/TRINITY_DN2279_c0_g<br>1/TRINITY_DN4385_c0_g1/TR<br>INITY_DN5086_c0_g1/TRINIT<br>Y_DN10707_c0_g1/TRINITY_<br>DN17487_c0_g1/TRINITY_DN<br>1169_c0_g1/TRINITY_DN6947<br>_c0_g1/TRINITY_DN7712_c0_<br>g1/TRINITY_DN36153_c0_g3/<br>TRINITY_DN14468_c0_g1/TRI<br>NITY_DN7744_c0_g1/TRINIT<br>Y_DN7659_c0_g1/TRINITY_D<br>N10783_c0_g1/TRINITY_DN1 | 38 |

|            |                            |         |          |                       |                       |                       |                                                                                                                                                                                                                                                                                                                                                                                                                                                                                                                                                                                                                                                                                                                                                                                                         |    |
|------------|----------------------------|---------|----------|-----------------------|-----------------------|-----------------------|---------------------------------------------------------------------------------------------------------------------------------------------------------------------------------------------------------------------------------------------------------------------------------------------------------------------------------------------------------------------------------------------------------------------------------------------------------------------------------------------------------------------------------------------------------------------------------------------------------------------------------------------------------------------------------------------------------------------------------------------------------------------------------------------------------|----|
| GO:0042587 | glycogen granule           | 9/2626  | 17/33142 | $1.64 \times 10^{-6}$ | $4.25 \times 10^{-5}$ | $3.18 \times 10^{-5}$ | 797_c0_g1/TRINITY_DN5157_c0_g2/TRINITY_DN10811_c0_g1/TRINITY_DN10145_c1_g1/TRINITY_DN520_c0_g1/TRINITY_DN3321_c0_g1/TRINITY_DN32077_c0_g1/TRINITY_DN93_c0_g1/TRINITY_DN1699_c1_g1/TRINITY_DN20528_c0_g1/TRINITY_DN11886_c0_g1/TRINITY_DN9786_c0_g1/TRINITY_DN51821_c0_g1/TRINITY_DN4326_c0_g1/TRINITY_DN3238_c0_g1/TRINITY_DN3030_c0_g1/TRINITY_DN4137_c2_g1/TRINITY_DN6505_c0_g1/TRINITY_DN7059_c0_g1/TRINITY_DN5788_c1_g1/TRINITY_DN19001_c0_g1/TRINITY_DN23921_c0_g1/TRINITY_DN482_c1_g1/TRINITY_DN29856_c0_g1/TRINITY_DN1549_c0_g1/TRINITY_DN40189_c0_g1/TRINITY_DN484_c0_g1/TRINITY_DN244_c3_g1/TRINITY_DN61025_c0_g1/TRINITY_DN19161_c0_g1/TRINITY_DN9451_c0_g1/TRINITY_DN1979_c0_g2/TRINITY_DN1265_c0_g1/TRINITY_DN5811_c0_g1/TRINITY_DN1979_c0_g1/TRINITY_DN4543_c0_g2/TRINITY_DN3083_c0_g1/TRI | 9  |
| GO:0003777 | microtubule motor activity | 22/2626 | 91/33142 | $1.81 \times 10^{-6}$ | $4.64 \times 10^{-5}$ | $3.48 \times 10^{-5}$ |                                                                                                                                                                                                                                                                                                                                                                                                                                                                                                                                                                                                                                                                                                                                                                                                         | 22 |

|            |                                                 |         |          |                       |                       |                       |                                                                                                                                                                                                                                                                                                                                                                                                                                                                                                                                                                                                                                                                                                                                                           |    |
|------------|-------------------------------------------------|---------|----------|-----------------------|-----------------------|-----------------------|-----------------------------------------------------------------------------------------------------------------------------------------------------------------------------------------------------------------------------------------------------------------------------------------------------------------------------------------------------------------------------------------------------------------------------------------------------------------------------------------------------------------------------------------------------------------------------------------------------------------------------------------------------------------------------------------------------------------------------------------------------------|----|
| GO:0031406 | carboxylic acid binding                         | 7/2626  | 10/33142 | $1.88 \times 10^{-6}$ | $4.75 \times 10^{-5}$ | $3.56 \times 10^{-5}$ | NITY_DN18134_c0_g1/TRINITY_DN1909_c0_g1/TRINITY_DN3767_c0_g1/TRINITY_DN10356_c0_g1/TRINITY_DN18791_c0_g1/TRINITY_DN5968_c0_g1/TRINITY_DN12133_c0_g1/TRINITY_DN35591_c0_g1/TRINITY_DN31689_c0_g1/TRINITY_DN6282_c0_g1/TRINITY_DN9647_c0_g1/TRINITY_DN5922_c0_g1/TRINITY_DN5578_c0_g1/TRINITY_DN13780_c0_g1<br>TRINITY_DN15486_c0_g2/TRINITY_DN10137_c0_g1/TRINITY_DN18587_c0_g2/TRINITY_DN1610_c0_g1/TRINITY_DN15536_c0_g1/TRINITY_DN6300_c0_g1/TRINITY_DN4895_c1_g1<br>TRINITY_DN1979_c0_g2/TRINITY_DN1979_c0_g1/TRINITY_DN3083_c0_g1/TRINITY_DN1979_c1_g1/TRINITY_DN15113_c0_g1/TRINITY_DN10356_c0_g1/TRINITY_DN29956_c0_g1<br>TRINITY_DN5378_c1_g1/TRINITY_DN3654_c0_g1/TRINITY_DN4958_c0_g1/TRINITY_DN1316_c0_g1/TRINITY_DN19635_c0_g1/TRINITY_DN13011 | 7  |
| GO:0036156 | inner dynein arm                                | 7/2626  | 10/33142 | $1.88 \times 10^{-6}$ | $4.75 \times 10^{-5}$ | $3.56 \times 10^{-5}$ | TRINITY_DN1979_c0_g2/TRINITY_DN1979_c0_g1/TRINITY_DN3083_c0_g1/TRINITY_DN1979_c1_g1/TRINITY_DN15113_c0_g1/TRINITY_DN10356_c0_g1/TRINITY_DN29956_c0_g1<br>TRINITY_DN5378_c1_g1/TRINITY_DN3654_c0_g1/TRINITY_DN4958_c0_g1/TRINITY_DN1316_c0_g1/TRINITY_DN19635_c0_g1/TRINITY_DN13011                                                                                                                                                                                                                                                                                                                                                                                                                                                                        | 7  |
| GO:0005230 | extracellular ligand-gated ion channel activity | 11/2626 | 26/33142 | $1.91 \times 10^{-6}$ | $4.76 \times 10^{-5}$ | $3.57 \times 10^{-5}$ | TRINITY_DN5378_c1_g1/TRINITY_DN3654_c0_g1/TRINITY_DN4958_c0_g1/TRINITY_DN1316_c0_g1/TRINITY_DN19635_c0_g1/TRINITY_DN13011                                                                                                                                                                                                                                                                                                                                                                                                                                                                                                                                                                                                                                 | 11 |

|            |                                   |         |          |                       |                       |                       |                                                                                                                                                                                                                                                                                                                                                                                                                                                                                                                                                                                                                                                                                                                                                                                            |    |
|------------|-----------------------------------|---------|----------|-----------------------|-----------------------|-----------------------|--------------------------------------------------------------------------------------------------------------------------------------------------------------------------------------------------------------------------------------------------------------------------------------------------------------------------------------------------------------------------------------------------------------------------------------------------------------------------------------------------------------------------------------------------------------------------------------------------------------------------------------------------------------------------------------------------------------------------------------------------------------------------------------------|----|
| GO:0045121 | membrane raft                     | 20/2626 | 78/33142 | $1.97 \times 10^{-6}$ | $4.88 \times 10^{-5}$ | $3.65 \times 10^{-5}$ | _c0_g1/TRINITY_DN7054_c0_g1/TRINITY_DN6655_c0_g1/TRINITY_DN2938_c3_g1/TRINITY_DN4757_c0_g1/TRINITY_DN4000_c0_g2<br>TRINITY_DN17778_c0_g1/TRINITY_DN1487_c0_g2/TRINITY_DN6931_c0_g1/TRINITY_DN18454_c0_g1/TRINITY_DN1557_c0_g1/TRINITY_DN7048_c0_g1/TRINITY_DN4514_c0_g1/TRINITY_DN200_c0_g2/TRINITY_DN16407_c1_g1/TRINITY_DN18051_c0_g1/TRINITY_DN17565_c0_g1/TRINITY_DN1852_c2_g1/TRINITY_DN6839_c2_g1/TRINITY_DN6910_c0_g1/TRINITY_DN4326_c0_g1/TRINITY_DN12650_c0_g1/TRINITY_DN7944_c0_g1/TRINITY_DN2285_c0_g1/TRINITY_DN14134_c0_g1/TRINITY_DN8692_c0_g1<br>TRINITY_DN9451_c0_g1/TRINITY_DN1979_c0_g2/TRINITY_DN552_c0_g1/TRINITY_DN1979_c0_g1/TRINITY_DN4543_c0_g2/TRINITY_DN3083_c0_g1/TRINITY_DN1979_c1_g1/TRINITY_DN4208_c0_g1/TRINITY_DN18134_c0_g1/TRINITY_DN10356_c0_g1/TRINITY | 20 |
| GO:0045505 | dynein intermediate chain binding | 17/2626 | 59/33142 | $2.00 \times 10^{-6}$ | $4.90 \times 10^{-5}$ | $3.67 \times 10^{-5}$ | TRINITY_DN9451_c0_g1/TRINITY_DN1979_c0_g2/TRINITY_DN552_c0_g1/TRINITY_DN1979_c0_g1/TRINITY_DN4543_c0_g2/TRINITY_DN3083_c0_g1/TRINITY_DN1979_c1_g1/TRINITY_DN4208_c0_g1/TRINITY_DN18134_c0_g1/TRINITY_DN10356_c0_g1/TRINITY                                                                                                                                                                                                                                                                                                                                                                                                                                                                                                                                                                 | 17 |

|            |                                  |         |           |                       |                       |                       |                                                                                                                                                                                                                                                                                                                                                                                                                                                                                                                                                                                                                                                                                                                                                                                                           |    |
|------------|----------------------------------|---------|-----------|-----------------------|-----------------------|-----------------------|-----------------------------------------------------------------------------------------------------------------------------------------------------------------------------------------------------------------------------------------------------------------------------------------------------------------------------------------------------------------------------------------------------------------------------------------------------------------------------------------------------------------------------------------------------------------------------------------------------------------------------------------------------------------------------------------------------------------------------------------------------------------------------------------------------------|----|
| GO:0006874 | cellular calcium ion homeostasis | 16/2626 | 53/33142  | $2.01 \times 10^{-6}$ | $4.90 \times 10^{-5}$ | $3.67 \times 10^{-5}$ | _DN436_c2_g1/TRINITY_DN31689_c0_g1/TRINITY_DN6282_c0_g1/TRINITY_DN9647_c0_g1/TRINITY_DN29956_c0_g1/TRINITY_DN39491_c0_g1/TRINITY_DN15080_c0_g1/TRINITY_DN21399_c0_g2/TRINITY_DN3388_c0_g1/TRINITY_DN17739_c0_g2/TRINITY_DN31967_c0_g1/TRINITY_DN7131_c0_g1/TRINITY_DN3180_c0_g1/TRINITY_DN1765_c2_g1/TRINITY_DN3816_c0_g1/TRINITY_DN9041_c0_g1/TRINITY_DN6603_c0_g1/TRINITY_DN982_c0_g1/TRINITY_DN7200_c0_g2/TRINITY_DN11061_c0_g2/TRINITY_DN9041_c0_g2/TRINITY_DN2197_c0_g1/TRINITY_DN18471_c0_g2/TRINITY_DN77781_c0_g1/TRINITY_DN10721_c0_g1/TRINITY_DN39639_c3_g1/TRINITY_DN7051_c0_g1/TRINITY_DN60483_c1_g1/TRINITY_DN5861_c0_g1/TRINITY_DN11422_c0_g1/TRINITY_DN3295_c0_g3/TRINITY_DN3065_c1_g1/TRINITY_DN1267_c0_g2/TRINITY_DN11704_c0_g1/TRINITY_DN1486_c0_g1/TRINITY_DN12852_c0_g1/TRINITY_DN346_ | 16 |
| GO:0008340 | determination of adult lifespan  | 24/2626 | 106/33142 | $2.21 \times 10^{-6}$ | $5.32 \times 10^{-5}$ | $3.98 \times 10^{-5}$ | 1_c0_g1/TRINITY_DN11422_c0_g1/TRINITY_DN3295_c0_g3/TRINITY_DN3065_c1_g1/TRINITY_DN1267_c0_g2/TRINITY_DN11704_c0_g1/TRINITY_DN1486_c0_g1/TRINITY_DN12852_c0_g1/TRINITY_DN346_                                                                                                                                                                                                                                                                                                                                                                                                                                                                                                                                                                                                                              | 24 |



|            |                                           |         |          |                       |                       |                       |                                                                                                                                                                                                                                                                                                                                                                                                                                                                                                                                                                                                                                                                                                                                                                                                    |    |
|------------|-------------------------------------------|---------|----------|-----------------------|-----------------------|-----------------------|----------------------------------------------------------------------------------------------------------------------------------------------------------------------------------------------------------------------------------------------------------------------------------------------------------------------------------------------------------------------------------------------------------------------------------------------------------------------------------------------------------------------------------------------------------------------------------------------------------------------------------------------------------------------------------------------------------------------------------------------------------------------------------------------------|----|
| GO:0080030 | methyl indole-3-acetate esterase activity | 18/2626 | 66/33142 | $2.43 \times 10^{-6}$ | $5.81 \times 10^{-5}$ | $4.35 \times 10^{-5}$ | c0_g1/TRINITY_DN16751_c0_g1/TRINITY_DN9642_c1_g2/TRINITY_DN953_c0_g1/TRINITY_DN6745_c0_g1/TRINITY_DN3595_c0_g1/TRINITY_DN4700_c0_g1/TRINITY_DN43262_c0_g1/TRINITY_DN33069_c0_g1/TRINITY_DN864_c0_g3/TRINITY_DN3295_c0_g1/TRINITY_DN9635_c0_g2/TRINITY_DN1429_c0_g1/TRINITY_DN9635_c0_g1/TRINITY_DN3521_c0_g1/TRINITY_DN13673_c0_g1/TRINITY_DN20279_c0_g1/TRINITY_DN13985_c0_g1/TRINITY_DN6946_c0_g1/TRINITY_DN39313_c0_g1/TRINITY_DN9545_c0_g1/TRINITY_DN638_c1_g1/TRINITY_DN59975_c0_g1/TRINITY_DN7783_c0_g2/TRINITY_DN2780_c2_g1/TRINITY_DN6194_c0_g1/TRINITY_DN5738_c0_g1/TRINITY_DN5274_c0_g1/TRINITY_DN7348_c1_g2/TRINITY_DN72971_c0_g1/TRINITY_DN17778_c0_g1/TRINITY_DN20653_c0_g1/TRINITY_DN28373_c0_g1/TRINITY_DN9375_c0_g1/TRINITY_DN4826_c1_g1/TRINITY_DN25715_c0_g1/TRINITY_DN6839_c2_g | 18 |
| GO:0050885 | neuromuscular process controlling balance | 10/2626 | 22/33142 | $2.55 \times 10^{-6}$ | $6.01 \times 10^{-5}$ | $4.50 \times 10^{-5}$ |                                                                                                                                                                                                                                                                                                                                                                                                                                                                                                                                                                                                                                                                                                                                                                                                    | 10 |

|            |               |         |           |                       |                       |                       |                                                                                                                                                                                                                                                                                                                                                                                                                                                                                                                                                                                                                                                                                                                                                                                                                 |    |
|------------|---------------|---------|-----------|-----------------------|-----------------------|-----------------------|-----------------------------------------------------------------------------------------------------------------------------------------------------------------------------------------------------------------------------------------------------------------------------------------------------------------------------------------------------------------------------------------------------------------------------------------------------------------------------------------------------------------------------------------------------------------------------------------------------------------------------------------------------------------------------------------------------------------------------------------------------------------------------------------------------------------|----|
| GO:0003779 | actin binding | 40/2626 | 232/33142 | $2.55 \times 10^{-6}$ | $6.01 \times 10^{-5}$ | $4.50 \times 10^{-5}$ | 1/TRINITY_DN9027_c0_g2/TRINITY_DN43641_c0_g1<br>TRINITY_DN3991_c0_g1/TRINITY_DN6440_c0_g1/TRINITY_DN6256_c0_g1/TRINITY_DN3245_c0_g1/TRINITY_DN3740_c1_g1/TRINITY_DN18454_c0_g1/TRINITY_DN47_c0_g1/TRINITY_DN954_c0_g1/TRINITY_DN6222_c0_g1/TRINITY_DN16954_c0_g1/TRINITY_DN2531_c0_g1/TRINITY_DN233_c0_g1/TRINITY_DN3732_c0_g1/TRINITY_DN7759_c0_g1/TRINITY_DN5519_c0_g1/TRINITY_DN5459_c0_g1/TRINITY_DN4441_c3_g1/TRINITY_DN2424_c0_g1/TRINITY_DN6081_c1_g2/TRINITY_DN2682_c0_g1/TRINITY_DN130_c0_g1/TRINITY_DN11154_c0_g1/TRINITY_DN8504_c0_g1/TRINITY_DN10575_c2_g1/TRINITY_DN5362_c0_g1/TRINITY_DN898_c0_g1/TRINITY_DN1174_c0_g1/TRINITY_DN2869_c2_g1/TRINITY_DN30302_c0_g1/TRINITY_DN3974_c0_g2/TRINITY_DN342_c0_g1/TRINITY_DN428_c0_g1/TRINITY_DN1186_c0_g1/TRINITY_DN2347_c1_g1/TRINITY_DN6505_c0_g1/TRI | 40 |
|------------|---------------|---------|-----------|-----------------------|-----------------------|-----------------------|-----------------------------------------------------------------------------------------------------------------------------------------------------------------------------------------------------------------------------------------------------------------------------------------------------------------------------------------------------------------------------------------------------------------------------------------------------------------------------------------------------------------------------------------------------------------------------------------------------------------------------------------------------------------------------------------------------------------------------------------------------------------------------------------------------------------|----|

|            |                         |         |          |                       |                       |                       |                                                                                                                                                                                                                                                                                                                                                                                                                                                                                                                                                                                                                                                                                                                                                                                               |    |
|------------|-------------------------|---------|----------|-----------------------|-----------------------|-----------------------|-----------------------------------------------------------------------------------------------------------------------------------------------------------------------------------------------------------------------------------------------------------------------------------------------------------------------------------------------------------------------------------------------------------------------------------------------------------------------------------------------------------------------------------------------------------------------------------------------------------------------------------------------------------------------------------------------------------------------------------------------------------------------------------------------|----|
| GO:0002576 | platelet degranulation  | 11/2626 | 27/33142 | $2.99 \times 10^{-6}$ | $6.83 \times 10^{-5}$ | $5.11 \times 10^{-5}$ | <p>NITY_DN3437_c0_g1/TRINITY_DN5922_c0_g1/TRINITY_DN269_c0_g1/TRINITY_DN6541_c1_g2/TRINITY_DN4487_c3_g2</p> <p>TRINITY_DN72971_c0_g1/TRINITY_DN406_c0_g3/TRINITY_DN15748_c0_g1/TRINITY_DN5049_c0_g1/TRINITY_DN2999_c0_g1/TRINITY_DN4826_c1_g1/TRINITY_DN406_c0_g2/TRINITY_DN56782_c0_g1/TRINITY_DN7713_c1_g1/TRINITY_DN5675_c0_g1/TRINITY_DN42565_c0_g1</p> <p>TRINITY_DN1748_c0_g1/TRINITY_DN31967_c0_g1/TRINITY_DN11938_c0_g1/TRINITY_DN1420_c0_g1/TRINITY_DN4620_c0_g1/TRINITY_DN4029_c0_g1/TRINITY_DN5234_c0_g1/TRINITY_DN11061_c0_g2/TRINITY_DN8343_c0_g1/TRINITY_DN4674_c0_g1/TRINITY_DN49433_c0_g1</p> <p>TRINITY_DN6790_c0_g1/TRINITY_DN1350_c0_g2/TRINITY_DN3312_c0_g1/TRINITY_DN10159_c1_g1/TRINITY_DN6641_c0_g2/TRINITY_DN6641_c0_g1/TRINITY_DN3717_c0_g1/TRINITY_DN5802_c0_g1</p> | 11 |
| GO:0048786 | presynaptic active zone | 11/2626 | 27/33142 | $2.99 \times 10^{-6}$ | $6.83 \times 10^{-5}$ | $5.11 \times 10^{-5}$ | <p>TRINITY_DN6790_c0_g1/TRINITY_DN1350_c0_g2/TRINITY_DN3312_c0_g1/TRINITY_DN10159_c1_g1/TRINITY_DN6641_c0_g2/TRINITY_DN6641_c0_g1/TRINITY_DN3717_c0_g1/TRINITY_DN5802_c0_g1</p>                                                                                                                                                                                                                                                                                                                                                                                                                                                                                                                                                                                                               | 11 |
| GO:0098595 | perivitelline space     | 8/2626  | 14/33142 | $2.99 \times 10^{-6}$ | $6.83 \times 10^{-5}$ | $5.11 \times 10^{-5}$ | <p>TRINITY_DN6790_c0_g1/TRINITY_DN1350_c0_g2/TRINITY_DN3312_c0_g1/TRINITY_DN10159_c1_g1/TRINITY_DN6641_c0_g2/TRINITY_DN6641_c0_g1/TRINITY_DN3717_c0_g1/TRINITY_DN5802_c0_g1</p>                                                                                                                                                                                                                                                                                                                                                                                                                                                                                                                                                                                                               | 8  |

|            |                                                                                  |         |          |                       |                       |                       |                                                                                                                                                                                                                                                                                                          |    |
|------------|----------------------------------------------------------------------------------|---------|----------|-----------------------|-----------------------|-----------------------|----------------------------------------------------------------------------------------------------------------------------------------------------------------------------------------------------------------------------------------------------------------------------------------------------------|----|
| GO:0016339 | calcium-dependent cell-cell adhesion via plasma membrane cell adhesion molecules | 12/2626 | 32/33142 | $3.00 \times 10^{-6}$ | $6.83 \times 10^{-5}$ | $5.11 \times 10^{-5}$ | TRINITY_DN7785_c0_g1/TRINITY_DN6331_c0_g1/TRINITY_DN2244_c1_g1/TRINITY_DN6174_c0_g1/TRINITY_DN1990_c0_g1/TRINITY_DN6348_c0_g1/TRINITY_DN43399_c0_g1/TRINITY_DN27045_c0_g1/TRINITY_DN2475_c0_g1/TRINITY_DN446_c1_g1/TRINITY_DN7687_c0_g1/TRINITY_DN2321_c0_g1                                             | 12 |
| GO:0030223 | neutrophil differentiation                                                       | 9/2626  | 18/33142 | $3.05 \times 10^{-6}$ | $6.89 \times 10^{-5}$ | $5.16 \times 10^{-5}$ | TRINITY_DN19001_c0_g1/TRINITY_DN23921_c0_g1/TRINITY_DN482_c1_g1/TRINITY_DN29856_c0_g1/TRINITY_DN1549_c0_g1/TRINITY_DN40189_c0_g1/TRINITY_DN484_c0_g1/TRINITY_DN244_c3_g1/TRINITY_DN61025_c0_g1                                                                                                           | 9  |
| GO:0008611 | ether lipid biosynthetic process                                                 | 14/2626 | 43/33142 | $3.22 \times 10^{-6}$ | $7.21 \times 10^{-5}$ | $5.40 \times 10^{-5}$ | TRINITY_DN2997_c0_g1/TRINITY_DN8066_c0_g1/TRINITY_DN57502_c0_g1/TRINITY_DN19001_c0_g1/TRINITY_DN23921_c0_g1/TRINITY_DN482_c1_g1/TRINITY_DN29856_c0_g1/TRINITY_DN6810_c0_g1/TRINITY_DN1549_c0_g1/TRINITY_DN1450_c0_g3/TRINITY_DN40189_c0_g1/TRINITY_DN484_c0_g1/TRINITY_DN244_c3_g1/TRINITY_DN61025_c0_g1 | 14 |

|            |                       |         |           |                       |                       |                       |                                                                                                                                                                                                                                                                                                                                                                                                                                                                                                                                                                                                                                                                                                                                                                                                                     |    |
|------------|-----------------------|---------|-----------|-----------------------|-----------------------|-----------------------|---------------------------------------------------------------------------------------------------------------------------------------------------------------------------------------------------------------------------------------------------------------------------------------------------------------------------------------------------------------------------------------------------------------------------------------------------------------------------------------------------------------------------------------------------------------------------------------------------------------------------------------------------------------------------------------------------------------------------------------------------------------------------------------------------------------------|----|
| GO:0030165 | PDZ domain binding    | 15/2626 | 49/33142  | $3.45 \times 10^{-6}$ | $7.67 \times 10^{-5}$ | $5.74 \times 10^{-5}$ | TRINITY_DN21399_c0_g2/TRINITY_DN1765_c2_g1/TRINITY_DN1420_c0_g1/TRINITY_DN3816_c0_g1/TRINITY_DN9041_c0_g1/TRINITY_DN22905_c0_g1/TRINITY_DN11886_c0_g1/TRINITY_DN3032_c1_g2/TRINITY_DN30302_c0_g1/TRINITY_DN7687_c0_g1/TRINITY_DN7200_c0_g2/TRINITY_DN9041_c0_g2/TRINITY_DN216_c0_g3/TRINITY_DN1941_c0_g1/TRINITY_DN10346_c1_g1/TRINITY_DN5310_c0_g2/TRINITY_DN6481_c0_g1/TRINITY_DN6342_c6_g1/TRINITY_DN14550_c0_g1/TRINITY_DN24518_c0_g1/TRINITY_DN1120_c0_g2/TRINITY_DN8330_c0_g1/TRINITY_DN15785_c0_g1/TRINITY_DN51904_c0_g1/TRINITY_DN1696_c0_g3/TRINITY_DN3916_c0_g1/TRINITY_DN4211_c1_g3/TRINITY_DN4477_c0_g1/TRINITY_DN28084_c0_g1/TRINITY_DN8330_c0_g2/TRINITY_DN7030_c0_g1/TRINITY_DN7326_c0_g1/TRINITY_DN18499_c0_g1/TRINITY_DN15289_c0_g1/TRINITY_DN10846_c0_g1/TRINITY_DN338_c0_g1/TRINITY_DN3238_c0_g1 | 15 |
| GO:0009617 | response to bacterium | 28/2626 | 139/33142 | $3.86 \times 10^{-6}$ | $8.52 \times 10^{-5}$ | $6.38 \times 10^{-5}$ |                                                                                                                                                                                                                                                                                                                                                                                                                                                                                                                                                                                                                                                                                                                                                                                                                     | 28 |

|            |                            |         |          |                       |                       |                       |                                                                                                                                                                                                                                                                                                                                                                                                                                                                                                                                                                                                                                                                                                                                                                                                                                                                                                          |    |
|------------|----------------------------|---------|----------|-----------------------|-----------------------|-----------------------|----------------------------------------------------------------------------------------------------------------------------------------------------------------------------------------------------------------------------------------------------------------------------------------------------------------------------------------------------------------------------------------------------------------------------------------------------------------------------------------------------------------------------------------------------------------------------------------------------------------------------------------------------------------------------------------------------------------------------------------------------------------------------------------------------------------------------------------------------------------------------------------------------------|----|
| GO:0008063 | Toll signaling pathway     | 10/2626 | 23/33142 | $4.19 \times 10^{-6}$ | $9.16 \times 10^{-5}$ | $6.86 \times 10^{-5}$ | g1/TRINITY_DN13165_c0_g1/<br>TRINITY_DN2058_c0_g5/TRI<br>NITY_DN637_c0_g1/TRINITY<br>_DN11595_c0_g1/TRINITY_D<br>N11595_c0_g2/TRINITY_DN4<br>674_c0_g1<br>TRINITY_DN22536_c0_g1/TRI<br>NITY_DN10890_c0_g1/TRINI<br>TY_DN15335_c0_g1/TRINITY<br>_DN10159_c1_g1/TRINITY_D<br>N14429_c0_g1/TRINITY_DN6<br>641_c0_g2/TRINITY_DN6641_<br>c0_g1/TRINITY_DN3717_c0_g<br>1/TRINITY_DN2292_c2_g1/TR<br>INITY_DN5802_c0_g1<br>TRINITY_DN59294_c0_g1/TRI<br>NITY_DN17581_c0_g1/TRINI<br>TY_DN11896_c0_g2/TRINITY<br>_DN542_c0_g2/TRINITY_DN3<br>6153_c0_g3/TRINITY_DN1201<br>_c3_g1/TRINITY_DN10873_c0<br>_g1/TRINITY_DN2327_c0_g1/<br>TRINITY_DN21082_c0_g1/TRI<br>NITY_DN13138_c0_g1/TRINI<br>TY_DN9780_c0_g1/TRINITY_<br>DN6745_c0_g1/TRINITY_DN1<br>5536_c0_g1/TRINITY_DN982_<br>c0_g1/TRINITY_DN4978_c0_g<br>1/TRINITY_DN1071_c0_g1/TR<br>INITY_DN1436_c1_g1/TRINIT<br>Y_DN16058_c0_g1/TRINITY_<br>DN579_c0_g1 | 10 |
| GO:0007005 | mitochondrion organization | 19/2626 | 75/33142 | $4.28 \times 10^{-6}$ | $9.30 \times 10^{-5}$ | $6.97 \times 10^{-5}$ |                                                                                                                                                                                                                                                                                                                                                                                                                                                                                                                                                                                                                                                                                                                                                                                                                                                                                                          | 19 |

|            |                                               |         |          |                       |                       |                       |                                                                                                                                                                                                                                                                                                                                                   |    |
|------------|-----------------------------------------------|---------|----------|-----------------------|-----------------------|-----------------------|---------------------------------------------------------------------------------------------------------------------------------------------------------------------------------------------------------------------------------------------------------------------------------------------------------------------------------------------------|----|
| GO:0008194 | UDP-glycosyltransferase activity              | 14/2626 | 44/33142 | $4.37 \times 10^{-6}$ | $9.43 \times 10^{-5}$ | $7.06 \times 10^{-5}$ | TRINITY_DN32009_c0_g1/TRINITY_DN16979_c0_g1/TRINITY_DN11954_c0_g1/TRINITY_DN23485_c0_g1/TRINITY_DN15487_c0_g1/TRINITY_DN5087_c0_g1/TRINITY_DN10011_c0_g1/TRINITY_DN4160_c0_g1/TRINITY_DN10583_c0_g1/TRINITY_DN974_c0_g1/TRINITY_DN15324_c1_g1/TRINITY_DN13235_c0_g1/TRINITY_DN13226_c0_g1/TRINITY_DN1200_c2_g1                                    | 14 |
| GO:0005201 | extracellular matrix structural constituent   | 16/2626 | 56/33142 | $4.50 \times 10^{-6}$ | $9.62 \times 10^{-5}$ | $7.20 \times 10^{-5}$ | TRINITY_DN12244_c0_g1/TRINITY_DN5310_c0_g2/TRINITY_DN2398_c2_g1/TRINITY_DN1949_c0_g1/TRINITY_DN6305_c1_g1/TRINITY_DN2738_c0_g1/TRINITY_DN1120_c0_g2/TRINITY_DN12194_c0_g1/TRINITY_DN8217_c0_g1/TRINITY_DN740_c0_g1/TRINITY_DN2598_c0_g2/TRINITY_DN18049_c0_g1/TRINITY_DN2868_c0_g1/TRINITY_DN8663_c0_g1/TRINITY_DN2281_c0_g1/TRINITY_DN5908_c0_g1 | 16 |
| GO:0045752 | positive regulation of Toll signaling pathway | 11/2626 | 28/33142 | $4.57 \times 10^{-6}$ | $9.69 \times 10^{-5}$ | $7.26 \times 10^{-5}$ | TRINITY_DN6113_c0_g1/TRINITY_DN15335_c0_g1/TRINITY_DN9354_c0_g1/TRINITY_DN10159_c1_g1/TRINITY_DN6957_c0_g1/TRINITY_DN1442                                                                                                                                                                                                                         | 11 |

|            |                       |         |          |                       |          |                       |                                                                                                                                                                                                                                                                                                                                                                                                                                                                                                                                                                                                                                                                                                                                                                      |    |
|------------|-----------------------|---------|----------|-----------------------|----------|-----------------------|----------------------------------------------------------------------------------------------------------------------------------------------------------------------------------------------------------------------------------------------------------------------------------------------------------------------------------------------------------------------------------------------------------------------------------------------------------------------------------------------------------------------------------------------------------------------------------------------------------------------------------------------------------------------------------------------------------------------------------------------------------------------|----|
| GO:0050892 | intestinal absorption | 7/2626  | 11/33142 | $4.82 \times 10^{-6}$ | 0.000101 | $7.55 \times 10^{-5}$ | 9_c0_g1/TRINITY_DN6641_c0_g2/TRINITY_DN9798_c0_g1/TRINITY_DN6641_c0_g1/TRINITY_DN5802_c0_g1/TRINITY_DN61_c0_g1<br>TRINITY_DN5364_c0_g1/TRINITY_DN4514_c0_g1/TRINITY_DN5086_c0_g1/TRINITY_DN14877_c1_g1/TRINITY_DN16407_c1_g1/TRINITY_DN11886_c0_g1/TRINITY_DN333_c0_g1<br>TRINITY_DN2006_c0_g1/TRINITY_DN1478_c1_g3/TRINITY_DN14468_c0_g1/TRINITY_DN10798_c0_g1/TRINITY_DN11056_c1_g1/TRINITY_DN11061_c0_g2/TRINITY_DN6409_c3_g1<br>TRINITY_DN47_c0_g1/TRINITY_DN7743_c0_g1/TRINITY_DN9564_c0_g1/TRINITY_DN200_c0_g2/TRINITY_DN8257_c0_g1/TRINITY_DN3507_c0_g1/TRINITY_DN17565_c0_g1/TRINITY_DN19001_c0_g1/TRINITY_DN23921_c0_g1/TRINITY_DN482_c1_g1/TRINITY_DN29856_c0_g1/TRINITY_DN7019_c0_g1/TRINITY_DN1549_c0_g1/TRINITY_DN55372_c0_g1/TRINITY_DN40189_c0_g1/TRI | 7  |
| GO:0051615 | histamine uptake      | 7/2626  | 11/33142 | $4.82 \times 10^{-6}$ | 0.000101 | $7.55 \times 10^{-5}$ | TRINITY_DN14468_c0_g1/TRINITY_DN10798_c0_g1/TRINITY_DN11056_c1_g1/TRINITY_DN11061_c0_g2/TRINITY_DN6409_c3_g1<br>TRINITY_DN47_c0_g1/TRINITY_DN7743_c0_g1/TRINITY_DN9564_c0_g1/TRINITY_DN200_c0_g2/TRINITY_DN8257_c0_g1/TRINITY_DN3507_c0_g1/TRINITY_DN17565_c0_g1/TRINITY_DN19001_c0_g1/TRINITY_DN23921_c0_g1/TRINITY_DN482_c1_g1/TRINITY_DN29856_c0_g1/TRINITY_DN7019_c0_g1/TRINITY_DN1549_c0_g1/TRINITY_DN55372_c0_g1/TRINITY_DN40189_c0_g1/TRI                                                                                                                                                                                                                                                                                                                     | 7  |
| GO:0042470 | melanosome            | 19/2626 | 76/33142 | $5.29 \times 10^{-6}$ | 0.000109 | $8.13 \times 10^{-5}$ | TRINITY_DN19001_c0_g1/TRINITY_DN23921_c0_g1/TRINITY_DN482_c1_g1/TRINITY_DN29856_c0_g1/TRINITY_DN7019_c0_g1/TRINITY_DN1549_c0_g1/TRINITY_DN55372_c0_g1/TRINITY_DN40189_c0_g1/TRI                                                                                                                                                                                                                                                                                                                                                                                                                                                                                                                                                                                      | 19 |



|            |                                    |         |          |                       |          |                       |                                                                                                                                                                                                                                                                                                                                                                                                                                                                                                                                                                                                                                                                                                                                                                              |    |
|------------|------------------------------------|---------|----------|-----------------------|----------|-----------------------|------------------------------------------------------------------------------------------------------------------------------------------------------------------------------------------------------------------------------------------------------------------------------------------------------------------------------------------------------------------------------------------------------------------------------------------------------------------------------------------------------------------------------------------------------------------------------------------------------------------------------------------------------------------------------------------------------------------------------------------------------------------------------|----|
| GO:0007416 | synapse assembly                   | 13/2626 | 39/33142 | $5.36 \times 10^{-6}$ | 0.000109 | $8.13 \times 10^{-5}$ | NITY_DN484_c0_g1/TRINITY_DN244_c3_g1/TRINITY_DN11160_c0_g1/TRINITY_DN61025_c0_g1<br>TRINITY_DN22536_c0_g1/TRINITY_DN9219_c0_g1/TRINITY_DN2738_c0_g1/TRINITY_DN9375_c0_g1/TRINITY_DN2557_c0_g2/TRINITY_DN8832_c1_g1/TRINITY_DN740_c0_g1/TRINITY_DN2598_c0_g2/TRINITY_DN8217_c1_g1/TRINITY_DN19224_c0_g1/TRINITY_DN2292_c2_g1/TRINITY_DN7687_c0_g1/TRINITY_DN428_c0_g1<br>TRINITY_DN2752_c0_g1/TRINITY_DN1979_c0_g2/TRINITY_DN3077_c2_g1/TRINITY_DN36928_c0_g1/TRINITY_DN16168_c0_g1/TRINITY_DN6380_c0_g1/TRINITY_DN306_c1_g2/TRINITY_DN10366_c0_g1/TRINITY_DN15544_c0_g1<br>TRINITY_DN1893_c0_g1/TRINITY_DN3778_c2_g1/TRINITY_DN6327_c1_g1/TRINITY_DN51872_c0_g1/TRINITY_DN12540_c0_g1/TRINITY_DN96301_c0_g1/TRINITY_DN9845_c0_g2/TRINITY_DN20346_c0_g1/TRINITY_DN49166_c0_g1 | 13 |
| GO:0007288 | sperm axoneme assembly             | 9/2626  | 19/33142 | $5.39 \times 10^{-6}$ | 0.000109 | $8.13 \times 10^{-5}$ |                                                                                                                                                                                                                                                                                                                                                                                                                                                                                                                                                                                                                                                                                                                                                                              | 9  |
| GO:0042462 | eye photoreceptor cell development | 9/2626  | 19/33142 | $5.39 \times 10^{-6}$ | 0.000109 | $8.13 \times 10^{-5}$ |                                                                                                                                                                                                                                                                                                                                                                                                                                                                                                                                                                                                                                                                                                                                                                              | 9  |

|            |                     |         |           |                       |          |                       |                                                                                                                                                                                                                                                                                                                                                                                                                                                                                                                                                                                                                                                                                                                                                                                                             |    |
|------------|---------------------|---------|-----------|-----------------------|----------|-----------------------|-------------------------------------------------------------------------------------------------------------------------------------------------------------------------------------------------------------------------------------------------------------------------------------------------------------------------------------------------------------------------------------------------------------------------------------------------------------------------------------------------------------------------------------------------------------------------------------------------------------------------------------------------------------------------------------------------------------------------------------------------------------------------------------------------------------|----|
| GO:0097730 | non-motile cilium   | 9/2626  | 19/33142  | $5.39 \times 10^{-6}$ | 0.000109 | $8.13 \times 10^{-5}$ | TRINITY_DN2398_c2_g1/TRINITY_DN11509_c0_g1/TRINITY_DN1949_c0_g1/TRINITY_DN22381_c0_g1/TRINITY_DN306_c1_g2/TRINITY_DN31435_c0_g1/TRINITY_DN9168_c0_g2/TRINITY_DN3299_c0_g1/TRINITY_DN4784_c1_g1/TRINITY_DN3245_c0_g1/TRINITY_DN19161_c0_g1/TRINITY_DN10881_c0_g1/TRINITY_DN7740_c0_g1/TRINITY_DN4223_c1_g1/TRINITY_DN12450_c0_g2/TRINITY_DN16186_c0_g1/TRINITY_DN16674_c1_g3/TRINITY_DN16674_c1_g2/TRINITY_DN1265_c0_g1/TRINITY_DN5811_c0_g1/TRINITY_DN6222_c0_g1/TRINITY_DN3762_c0_g1/TRINITY_DN2531_c0_g1/TRINITY_DN233_c0_g1/TRINITY_DN13406_c0_g1/TRINITY_DN3597_c0_g2/TRINITY_DN10076_c0_g1/TRINITY_DN4474_c0_g1/TRINITY_DN377_c0_g1/TRINITY_DN8504_c0_g1/TRINITY_DN11664_c0_g1/TRINITY_DN10569_c0_g2/TRINITY_DN18791_c0_g1/TRINITY_DN12133_c0_g1/TRINITY_DN2869_c2_g1/TRINITY_DN26007_c0_g2/TRINITY_DN | 9  |
| GO:0008017 | microtubule binding | 32/2626 | 173/33142 | $5.54 \times 10^{-6}$ | 0.000111 | $8.31 \times 10^{-5}$ |                                                                                                                                                                                                                                                                                                                                                                                                                                                                                                                                                                                                                                                                                                                                                                                                             | 32 |

|            |                         |         |           |                       |          |                       |                                                                                                                                                                                                                                                                                                                                                                                                                                                                                                                                                                                                                                                                                                                                                                                                                |    |
|------------|-------------------------|---------|-----------|-----------------------|----------|-----------------------|----------------------------------------------------------------------------------------------------------------------------------------------------------------------------------------------------------------------------------------------------------------------------------------------------------------------------------------------------------------------------------------------------------------------------------------------------------------------------------------------------------------------------------------------------------------------------------------------------------------------------------------------------------------------------------------------------------------------------------------------------------------------------------------------------------------|----|
| GO:0016042 | lipid catabolic process | 32/2626 | 174/33142 | $6.28 \times 10^{-6}$ | 0.000125 | $9.35 \times 10^{-5}$ | 3890_c0_g1/TRINITY_DN5925<br>9_c0_g1/TRINITY_DN3810_c0_g1/TRINITY_DN5922_c0_g1/TRINITY_DN13780_c0_g1/TRINITY_DN5872_c0_g1/TRINITY_DN1568_c0_g2/TRINITY_DN3772_c0_g1/TRINITY_DN6455_c0_g1/TRINITY_DN1487_c0_g2/TRINITY_DN6700_c0_g1/TRINITY_DN9425_c0_g1/TRINITY_DN77269_c0_g1/TRINITY_DN5164_c0_g3/TRINITY_DN4813_c0_g1/TRINITY_DN21814_c0_g2/TRINITY_DN5164_c0_g2/TRINITY_DN9375_c0_g1/TRINITY_DN23263_c0_g1/TRINITY_DN4485_c0_g1/TRINITY_DN4211_c1_g3/TRINITY_DN39313_c0_g1/TRINITY_DN6482_c0_g1/TRINITY_DN6654_c0_g1/TRINITY_DN18499_c0_g1/TRINITY_DN17391_c0_g1/TRINITY_DN5833_c0_g1/TRINITY_DN20484_c0_g3/TRINITY_DN6745_c0_g1/TRINITY_DN21191_c0_g1/TRINITY_DN4537_c0_g1/TRINITY_DN6376_c0_g1/TRINITY_DN2780_c2_g1/TRINITY_DN3989_c1_g1/TRINITY_DN29189_c0_g1/TRINITY_DN2413_c0_g1/TRINITY_DN10629_c0_g1 | 32 |
|------------|-------------------------|---------|-----------|-----------------------|----------|-----------------------|----------------------------------------------------------------------------------------------------------------------------------------------------------------------------------------------------------------------------------------------------------------------------------------------------------------------------------------------------------------------------------------------------------------------------------------------------------------------------------------------------------------------------------------------------------------------------------------------------------------------------------------------------------------------------------------------------------------------------------------------------------------------------------------------------------------|----|

|            |                      |         |           |                       |         |                       |                                                                                                                                                                                                                                                                                                                                                                                                                                                                                                                                                                                                                                                                                                                                                                                                        |    |
|------------|----------------------|---------|-----------|-----------------------|---------|-----------------------|--------------------------------------------------------------------------------------------------------------------------------------------------------------------------------------------------------------------------------------------------------------------------------------------------------------------------------------------------------------------------------------------------------------------------------------------------------------------------------------------------------------------------------------------------------------------------------------------------------------------------------------------------------------------------------------------------------------------------------------------------------------------------------------------------------|----|
| GO:0006814 | sodium ion transport | 27/2626 | 135/33142 | $6.56 \times 10^{-6}$ | 0.00013 | $9.70 \times 10^{-5}$ | TRINITY_DN3268_c0_g1/TRINITY_DN16444_c1_g1/TRINITY_DN149_c1_g1/TRINITY_DN17739_c0_g2/TRINITY_DN10841_c0_g1/TRINITY_DN27259_c0_g1/TRINITY_DN7737_c0_g1/TRINITY_DN570_c0_g1/TRINITY_DN14068_c0_g2/TRINITY_DN32284_c0_g2/TRINITY_DN6304_c1_g1/TRINITY_DN14068_c0_g1/TRINITY_DN9994_c0_g1/TRINITY_DN8765_c1_g1/TRINITY_DN17412_c0_g1/TRINITY_DN10545_c1_g1/TRINITY_DN17398_c0_g2/TRINITY_DN8644_c0_g1/TRINITY_DN12721_c0_g1/TRINITY_DN14068_c0_g3/TRINITY_DN216_c0_g3/TRINITY_DN4700_c0_g1/TRINITY_DN2003_c0_g1/TRINITY_DN19234_c0_g1/TRINITY_DN20249_c0_g1/TRINITY_DN9004_c0_g1/TRINITY_DN46_c0_g1<br>TRINITY_DN3991_c0_g1/TRINITY_DN21789_c0_g1/TRINITY_DN7371_c0_g1/TRINITY_DN3388_c0_g1/TRINITY_DN1830_c0_g2/TRINITY_DN459_c1_g1/TRINITY_DN2476_c2_g1/TRINITY_DN1557_c0_g1/TRINITY_DN13505_c0_g1/TRINI | 27 |
| GO:0008233 | peptidase activity   | 30/2626 | 159/33142 | $7.12 \times 10^{-6}$ | 0.00014 | 0.000105              |                                                                                                                                                                                                                                                                                                                                                                                                                                                                                                                                                                                                                                                                                                                                                                                                        | 30 |

|            |                |         |          |                       |          |          |                                                                                                                                                                                                                                                                                                                                                                                                                                                                                                                                                                                                                                                                                                                                                                                                   |    |
|------------|----------------|---------|----------|-----------------------|----------|----------|---------------------------------------------------------------------------------------------------------------------------------------------------------------------------------------------------------------------------------------------------------------------------------------------------------------------------------------------------------------------------------------------------------------------------------------------------------------------------------------------------------------------------------------------------------------------------------------------------------------------------------------------------------------------------------------------------------------------------------------------------------------------------------------------------|----|
| GO:0003774 | motor activity | 20/2626 | 85/33142 | $8.16 \times 10^{-6}$ | 0.000159 | 0.000119 | TY_DN2648_c0_g1/TRINITY_DN17581_c0_g1/TRINITY_DN9354_c0_g1/TRINITY_DN40529_c0_g1/TRINITY_DN3503_c0_g1/TRINITY_DN12260_c0_g1/TRINITY_DN19398_c0_g2/TRINITY_DN14570_c0_g1/TRINITY_DN1252_c0_g1/TRINITY_DN4173_c0_g1/TRINITY_DN18049_c0_g1/TRINITY_DN7714_c0_g1/TRINITY_DN60975_c0_g1/TRINITY_DN2682_c0_g1/TRINITY_DN30055_c0_g1/TRINITY_DN46894_c1_g1/TRINITY_DN12254_c0_g3/TRINITY_DN55372_c0_g1/TRINITY_DN1589_c5_g1/TRINITY_DN1436_c1_g1/TRINITY_DN7595_c1_g1<br>TRINITY_DN5849_c0_g2/TRINITY_DN47_c0_g1/TRINITY_DN13313_c0_g1/TRINITY_DN552_c0_g1/TRINITY_DN12886_c0_g1/TRINITY_DN7759_c0_g1/TRINITY_DN4208_c0_g1/TRINITY_DN5459_c0_g1/TRINITY_DN4441_c3_g1/TRINITY_DN15113_c0_g1/TRINITY_DN18791_c0_g1/TRINITY_DN2372_c0_g1/TRINITY_DN5968_c0_g1/TRINITY_DN436_c2_g1/TRINITY_DN14798_c0_g1/TRI | 20 |
|------------|----------------|---------|----------|-----------------------|----------|----------|---------------------------------------------------------------------------------------------------------------------------------------------------------------------------------------------------------------------------------------------------------------------------------------------------------------------------------------------------------------------------------------------------------------------------------------------------------------------------------------------------------------------------------------------------------------------------------------------------------------------------------------------------------------------------------------------------------------------------------------------------------------------------------------------------|----|

|            |                                  |         |          |                       |          |          |                                                                                                                                                                                                                                                                                                                                                                                                                                                                                                                                                                                                                                                                                                                                                         |    |
|------------|----------------------------------|---------|----------|-----------------------|----------|----------|---------------------------------------------------------------------------------------------------------------------------------------------------------------------------------------------------------------------------------------------------------------------------------------------------------------------------------------------------------------------------------------------------------------------------------------------------------------------------------------------------------------------------------------------------------------------------------------------------------------------------------------------------------------------------------------------------------------------------------------------------------|----|
| GO:0030879 | mammary gland development        | 9/2626  | 20/33142 | $9.10 \times 10^{-6}$ | 0.000176 | 0.000132 | NITY_DN342_c0_g1/TRINITY_DN2347_c1_g1/TRINITY_DN12005_c0_g1/TRINITY_DN39491_c0_g1/TRINITY_DN15080_c0_g1<br>TRINITY_DN19001_c0_g1/TRINITY_DN23921_c0_g1/TRINITY_DN482_c1_g1/TRINITY_DN29856_c0_g1/TRINITY_DN1549_c0_g1/TRINITY_DN40189_c0_g1/TRINITY_DN484_c0_g1/TRINITY_DN244_c3_g1/TRINITY_DN61025_c0_g1<br>TRINITY_DN6898_c0_g1/TRINITY_DN7384_c0_g1/TRINITY_DN2458_c0_g2/TRINITY_DN42262_c0_g1/TRINITY_DN6827_c0_g1/TRINITY_DN2458_c0_g1/TRINITY_DN3736_c0_g1/TRINITY_DN12544_c0_g1/TRINITY_DN7082_c0_g1/TRINITY_DN5646_c0_g1/TRINITY_DN10967_c0_g2/TRINITY_DN8346_c1_g1/TRINITY_DN13353_c0_g1/TRINITY_DN1578_c0_g1/TRINITY_DN1118_c0_g1/TRINITY_DN10219_c0_g2/TRINITY_DN14778_c0_g1/TRINITY_DN3942_c0_g1/TRINITY_DN43074_c0_g1/TRINITY_DN8671_c0_g1 | 9  |
| GO:0004364 | glutathione transferase activity | 20/2626 | 86/33142 | $9.84 \times 10^{-6}$ | 0.000189 | 0.000141 |                                                                                                                                                                                                                                                                                                                                                                                                                                                                                                                                                                                                                                                                                                                                                         | 20 |

|            |                           |         |          |                       |          |          |                                                                                                                                                                                                                                                                                                       |    |
|------------|---------------------------|---------|----------|-----------------------|----------|----------|-------------------------------------------------------------------------------------------------------------------------------------------------------------------------------------------------------------------------------------------------------------------------------------------------------|----|
| GO:0001654 | eye development           | 11/2626 | 30/33142 | $1.00 \times 10^{-5}$ | 0.000189 | 0.000141 | TRINITY_DN2476_c2_g1/TRINITY_DN2489_c0_g1/TRINITY_DN7582_c0_g1/TRINITY_DN6485_c0_g1/TRINITY_DN480_c0_g1/TRINITY_DN306_c1_g2/TRINITY_DN26279_c0_g1/TRINITY_DN11825_c0_g1/TRINITY_DN3241_c0_g1/TRINITY_DN8116_c0_g1/TRINITY_DN4381_c0_g1                                                                | 11 |
| GO:0042572 | retinol metabolic process | 11/2626 | 30/33142 | $1.00 \times 10^{-5}$ | 0.000189 | 0.000141 | TRINITY_DN146_c0_g1/TRINITY_DN19075_c0_g1/TRINITY_DN21901_c0_g1/TRINITY_DN10027_c0_g1/TRINITY_DN25301_c0_g1/TRINITY_DN31870_c0_g1/TRINITY_DN2009_c0_g1/TRINITY_DN9845_c0_g2/TRINITY_DN20346_c0_g1/TRINITY_DN77404_c0_g1/TRINITY_DN56436_c0_g1                                                         | 11 |
| GO:0030672 | synaptic vesicle membrane | 15/2626 | 53/33142 | $1.01 \times 10^{-5}$ | 0.000189 | 0.000141 | TRINITY_DN9170_c1_g1/TRINITY_DN4032_c0_g1/TRINITY_DN28373_c0_g1/TRINITY_DN5859_c0_g1/TRINITY_DN27259_c0_g1/TRINITY_DN31967_c0_g1/TRINITY_DN7737_c0_g1/TRINITY_DN4477_c0_g1/TRINITY_DN11938_c0_g1/TRINITY_DN25715_c0_g1/TRINITY_DN2165_c3_g1/TRINITY_DN1800_c0_g1/TRINITY_DN33662_c0_g1/TRINITY_DN1106 | 15 |

|            |                                   |         |          |                       |          |          |                                                                                                                                                                                                                                                                                                                                                                                                                                                                                                                                                                                                                                                                                                                                                                       |    |
|------------|-----------------------------------|---------|----------|-----------------------|----------|----------|-----------------------------------------------------------------------------------------------------------------------------------------------------------------------------------------------------------------------------------------------------------------------------------------------------------------------------------------------------------------------------------------------------------------------------------------------------------------------------------------------------------------------------------------------------------------------------------------------------------------------------------------------------------------------------------------------------------------------------------------------------------------------|----|
| GO:0045503 | dynein light chain binding        | 15/2626 | 53/33142 | $1.01 \times 10^{-5}$ | 0.000189 | 0.000141 | 1_c0_g2/TRINITY_DN4674_c0_g1<br>TRINITY_DN9451_c0_g1/TRINITY_DN1979_c0_g2/TRINITY_DN2557_c0_g2/TRINITY_DN1979_c0_g1/TRINITY_DN4543_c0_g2/TRINITY_DN3083_c0_g1/TRINITY_DN1979_c1_g1/TRINITY_DN18134_c0_g1/TRINITY_DN10356_c0_g1/TRINITY_DN5968_c0_g1/TRINITY_DN14798_c0_g1/TRINITY_DN31689_c0_g1/TRINITY_DN6282_c0_g1/TRINITY_DN9647_c0_g1/TRINITY_DN29956_c0_g1/TRINITY_DN15335_c0_g1/TRINITY_DN3007_c0_g1/TRINITY_DN2779_c1_g2/TRINITY_DN15112_c0_g1/TRINITY_DN14429_c0_g1/TRINITY_DN6641_c0_g2/TRINITY_DN39494_c0_g1/TRINITY_DN6641_c0_g1/TRINITY_DN2779_c1_g3/TRINITY_DN5802_c0_g1<br>TRINITY_DN14689_c0_g1/TRINITY_DN2778_c1_g1/TRINITY_DN1229_c0_g2/TRINITY_DN155476_c0_g1/TRINITY_DN18821_c0_g1/TRINITY_DN70025_c0_g1/TRINITY_DN1229_c0_g4/TRINITY_DN1229_c0_g3 | 15 |
| GO:0031638 | zymogen activation                | 10/2626 | 25/33142 | $1.03 \times 10^{-5}$ | 0.000192 | 0.000144 |                                                                                                                                                                                                                                                                                                                                                                                                                                                                                                                                                                                                                                                                                                                                                                       | 10 |
| GO:0004503 | monophenol monooxygenase activity | 8/2626  | 16/33142 | $1.11 \times 10^{-5}$ | 0.000202 | 0.000151 |                                                                                                                                                                                                                                                                                                                                                                                                                                                                                                                                                                                                                                                                                                                                                                       | 8  |



|            |                                              |         |          |                       |          |          |                                                                                                                                                                                                                                                                                                                                                                                                                                                                                                                                                                                                                                   |    |
|------------|----------------------------------------------|---------|----------|-----------------------|----------|----------|-----------------------------------------------------------------------------------------------------------------------------------------------------------------------------------------------------------------------------------------------------------------------------------------------------------------------------------------------------------------------------------------------------------------------------------------------------------------------------------------------------------------------------------------------------------------------------------------------------------------------------------|----|
| GO:0032420 | stereocilium                                 | 8/2626  | 16/33142 | $1.11 \times 10^{-5}$ | 0.000202 | 0.000151 | TRINITY_DN9358_c0_g1/TRINITY_DN17778_c0_g1/TRINITY_DN6174_c0_g1/TRINITY_DN47_c0_g1/TRINITY_DN20653_c0_g1/TRINITY_DN7759_c0_g1/TRINITY_DN2746_c0_g1/TRINITY_DN6945_c0_g2/TRINITY_DN8493_c0_g1/TRINITY_DN1568_c0_g1/TRINITY_DN5364_c0_g1/TRINITY_DN5086_c0_g1/TRINITY_DN10757_c0_g1/TRINITY_DN26376_c0_g1/TRINITY_DN333_c0_g1/TRINITY_DN38748_c0_g1/TRINITY_DN14383_c0_g1/TRINITY_DN3284_c0_g1/TRINITY_DN13981_c0_g1/TRINITY_DN85_c0_g1/TRINITY_DN5519_c0_g1/TRINITY_DN35269_c0_g1/TRINITY_DN2805_c7_g1/TRINITY_DN9843_c0_g1/TRINITY_DN144_c0_g1/TRINITY_DN39722_c0_g1/TRINITY_DN982_c0_g1/TRINITY_DN8181_c0_g1/TRINITY_DN342_c0_g1 | 8  |
| GO:0034375 | high-density lipoprotein particle remodeling | 8/2626  | 16/33142 | $1.11 \times 10^{-5}$ | 0.000202 | 0.000151 | TRINITY_DN21399_c0_g2/TRINITY_DN9170_c1_g1/TRINITY_DN8355_c0_g1/TRINITY_DN29720_c0_g1/TRINITY_DN2424_c0_g1/TRINITY_DN11938_c0_g1/TRINITY_DN1765_c2_g1                                                                                                                                                                                                                                                                                                                                                                                                                                                                             | 8  |
| GO:0007498 | mesoderm development                         | 13/2626 | 42/33142 | $1.34 \times 10^{-5}$ | 0.000243 | 0.000182 |                                                                                                                                                                                                                                                                                                                                                                                                                                                                                                                                                                                                                                   | 13 |
| GO:0043195 | terminal bouton                              | 14/2626 | 48/33142 | $1.36 \times 10^{-5}$ | 0.000244 | 0.000183 |                                                                                                                                                                                                                                                                                                                                                                                                                                                                                                                                                                                                                                   | 14 |

|            |                             |         |          |                       |          |          |                                                                                                                                                                                                                                                                                                                                                                                                                                                                                                                                                                                                                                                                                                                                                                                  |    |
|------------|-----------------------------|---------|----------|-----------------------|----------|----------|----------------------------------------------------------------------------------------------------------------------------------------------------------------------------------------------------------------------------------------------------------------------------------------------------------------------------------------------------------------------------------------------------------------------------------------------------------------------------------------------------------------------------------------------------------------------------------------------------------------------------------------------------------------------------------------------------------------------------------------------------------------------------------|----|
| GO:0001750 | photoreceptor outer segment | 10/2626 | 26/33142 | $1.56 \times 10^{-5}$ | 0.000275 | 0.000206 | g1/TRINITY_DN3816_c0_g1/TRINITY_DN9041_c0_g1/TRINITY_DN4029_c0_g1/TRINITY_DN10575_c2_g1/TRINITY_DN15420_c0_g1/TRINITY_DN7200_c0_g2/TRINITY_DN9041_c0_g2<br>TRINITY_DN146_c0_g1/TRINITY_DN21901_c0_g1/TRINITY_DN10027_c0_g1/TRINITY_DN7048_c0_g1/TRINITY_DN47_c0_g1/TRINITY_DN2924_c1_g1/TRINITY_DN25301_c0_g1/TRINITY_DN5459_c0_g1/TRINITY_DN9845_c0_g2/TRINITY_DN6945_c0_g2<br>TRINITY_DN3245_c0_g1/TRINITY_DN13157_c0_g1/TRINITY_DN5956_c5_g1/TRINITY_DN2051_c0_g1/TRINITY_DN9930_c0_g2/TRINITY_DN2415_c2_g1/TRINITY_DN5912_c0_g1/TRINITY_DN3890_c0_g1/TRINITY_DN3810_c0_g1/TRINITY_DN579_c0_g1<br>TRINITY_DN21399_c0_g2/TRINITY_DN2738_c0_g1/TRINITY_DN740_c0_g1/TRINITY_DN2598_c0_g2/TRINITY_DN1765_c2_g1/TRINITY_DN3816_c0_g1/TRINITY_DN9041_c0_g1/TRINITY_DN7200_c0_g2/TRI | 10 |
| GO:0015631 | tubulin binding             | 10/2626 | 26/33142 | $1.56 \times 10^{-5}$ | 0.000275 | 0.000206 | 930_c0_g2/TRINITY_DN2415_c2_g1/TRINITY_DN5912_c0_g1/TRINITY_DN3890_c0_g1/TRINITY_DN3810_c0_g1/TRINITY_DN579_c0_g1<br>TRINITY_DN21399_c0_g2/TRINITY_DN2738_c0_g1/TRINITY_DN740_c0_g1/TRINITY_DN2598_c0_g2/TRINITY_DN1765_c2_g1/TRINITY_DN3816_c0_g1/TRINITY_DN9041_c0_g1/TRINITY_DN7200_c0_g2/TRI                                                                                                                                                                                                                                                                                                                                                                                                                                                                                 | 10 |
| GO:0043113 | receptor clustering         | 10/2626 | 26/33142 | $1.56 \times 10^{-5}$ | 0.000275 | 0.000206 | N2598_c0_g2/TRINITY_DN1765_c2_g1/TRINITY_DN3816_c0_g1/TRINITY_DN9041_c0_g1/TRINITY_DN7200_c0_g2/TRI                                                                                                                                                                                                                                                                                                                                                                                                                                                                                                                                                                                                                                                                              | 10 |

|            |                                                           |         |           |                       |          |          |                                                                                                                                                                                                                                                                                                                                                                                                                                                                                                                                                                                                                                                                                                                                                                 |    |
|------------|-----------------------------------------------------------|---------|-----------|-----------------------|----------|----------|-----------------------------------------------------------------------------------------------------------------------------------------------------------------------------------------------------------------------------------------------------------------------------------------------------------------------------------------------------------------------------------------------------------------------------------------------------------------------------------------------------------------------------------------------------------------------------------------------------------------------------------------------------------------------------------------------------------------------------------------------------------------|----|
| GO:0043197 | dendritic spine                                           | 15/2626 | 55/33142  | $1.65 \times 10^{-5}$ | 0.000288 | 0.000216 | NITY_DN9041_c0_g2/TRINITY_DN7084_c0_g1<br>TRINITY_DN4329_c1_g1/TRINITY_DN1775_c0_g3/TRINITY_DN1765_c2_g1/TRINITY_DN10569_c0_g2/TRINITY_DN9935_c1_g1/TRINITY_DN10575_c2_g1/TRINITY_DN15420_c0_g1/TRINITY_DN7687_c0_g1/TRINITY_DN12650_c0_g1/TRINITY_DN428_c0_g1/TRINITY_DN1908_c0_g1/TRINITY_DN6505_c0_g1/TRINITY_DN49433_c0_g1/TRINITY_DN18471_c0_g2<br>TRINITY_DN9451_c0_g1/TRINITY_DN1979_c0_g2/TRINITY_DN1979_c0_g1/TRINITY_DN4543_c0_g2/TRINITY_DN3083_c0_g1/TRINITY_DN1979_c1_g1/TRINITY_DN4208_c0_g1/TRINITY_DN18134_c0_g1/TRINITY_DN10356_c0_g1/TRINITY_DN436_c2_g1/TRINITY_DN31689_c0_g1/TRINITY_DN6282_c0_g1/TRINITY_DN9647_c0_g1/TRINITY_DN29956_c0_g1/TRINITY_DN39491_c0_g1/TRINITY_DN2578_c0_g1/TRINITY_DN219_c3_g1/TRINITY_DN11739_c0_g1/TRINITY_D | 15 |
| GO:0051959 | dynein light intermediate chain binding                   | 15/2626 | 55/33142  | $1.65 \times 10^{-5}$ | 0.000288 | 0.000216 | TRINITY_DN18134_c0_g1/TRINITY_DN10356_c0_g1/TRINITY_DN436_c2_g1/TRINITY_DN31689_c0_g1/TRINITY_DN6282_c0_g1/TRINITY_DN9647_c0_g1/TRINITY_DN29956_c0_g1/TRINITY_DN39491_c0_g1/TRINITY_DN2578_c0_g1/TRINITY_DN219_c3_g1/TRINITY_DN11739_c0_g1/TRINITY_D                                                                                                                                                                                                                                                                                                                                                                                                                                                                                                            | 15 |
| GO:0045944 | positive regulation of transcription by RNA polymerase II | 61/2626 | 444/33142 | $1.86 \times 10^{-5}$ | 0.000322 | 0.000241 | NITY_DN219_c3_g1/TRINITY_DN11739_c0_g1/TRINITY_D                                                                                                                                                                                                                                                                                                                                                                                                                                                                                                                                                                                                                                                                                                                | 61 |



N22536\_c0\_g1/TRINITY\_DN1  
0890\_c0\_g1/TRINITY\_DN439\_  
c0\_g1/TRINITY\_DN3120\_c0\_g  
1/TRINITY\_DN2738\_c0\_g1/TR  
INITY\_DN5878\_c0\_g1/TRINIT  
Y\_DN9571\_c0\_g2/TRINITY\_D  
N2476\_c1\_g1/TRINITY\_DN27  
78\_c0\_g3/TRINITY\_DN2843\_c  
0\_g2/TRINITY\_DN21131\_c0\_g  
2/TRINITY\_DN8903\_c0\_g1/TR  
INITY\_DN19269\_c0\_g1/TRINI  
TY\_DN22837\_c0\_g1/TRINITY  
\_DN2898\_c0\_g1/TRINITY\_DN  
11693\_c0\_g2/TRINITY\_DN143  
83\_c0\_g1/TRINITY\_DN85\_c0\_  
g1/TRINITY\_DN170\_c1\_g1/TR  
INITY\_DN3713\_c1\_g1/TRINIT  
Y\_DN740\_c0\_g1/TRINITY\_D  
N1541\_c0\_g1/TRINITY\_DN45  
371\_c0\_g1/TRINITY\_DN2598\_  
c0\_g2/TRINITY\_DN5296\_c0\_g  
1/TRINITY\_DN18436\_c0\_g1/T  
RINITY\_DN27747\_c0\_g1/TRI  
NITY\_DN9245\_c0\_g1/TRINIT  
Y\_DN3722\_c0\_g1/TRINITY\_D  
N12413\_c0\_g1/TRINITY\_DN1  
111\_c0\_g1/TRINITY\_DN23750  
\_c0\_g1/TRINITY\_DN2292\_c2\_  
g1/TRINITY\_DN56782\_c0\_g1/  
TRINITY\_DN1699\_c1\_g1/TRI  
NITY\_DN29974\_c0\_g1/TRINI  
TY\_DN40503\_c0\_g1/TRINITY

|            |                               |        |          |                       |          |          |                                                                                                                                                                                                                                                                                                                                                                                                                                                                                                                                                                                                                                                                                                                                                                                                          |   |
|------------|-------------------------------|--------|----------|-----------------------|----------|----------|----------------------------------------------------------------------------------------------------------------------------------------------------------------------------------------------------------------------------------------------------------------------------------------------------------------------------------------------------------------------------------------------------------------------------------------------------------------------------------------------------------------------------------------------------------------------------------------------------------------------------------------------------------------------------------------------------------------------------------------------------------------------------------------------------------|---|
| GO:0043691 | reverse cholesterol transport | 8/2626 | 17/33142 | $1.95 \times 10^{-5}$ | 0.000333 | 0.000249 | _DN34504_c0_g1/TRINITY_DN10400_c0_g1/TRINITY_DN3636_c0_g3/TRINITY_DN1174_c0_g1/TRINITY_DN3636_c0_g4/TRINITY_DN338_c0_g1/TRINITY_DN4326_c0_g1/TRINITY_DN12512_c0_g1/TRINITY_DN15930_c0_g1/TRINITY_DN3241_c0_g1/TRINITY_DN5118_c0_g2/TRINITY_DN4137_c2_g1/TRINITY_DN16221_c0_g1/TRINITY_DN9800_c1_g1/TRINITY_DN9485_c0_g1/TRINITY_DN8449_c0_g1/TRINITY_DN4784_c1_g1/TRINITY_DN6589_c0_g1/TRINITY_DN7059_c0_g1/TRINITY_DN674_c2_g1/TRINITY_DN8692_c0_g1/TRINITY_DN8493_c0_g1/TRINITY_DN5364_c0_g1/TRINITY_DN7048_c0_g1/TRINITY_DN5086_c0_g1/TRINITY_DN10757_c0_g1/TRINITY_DN26376_c0_g1/TRINITY_DN333_c0_g1/TRINITY_DN38748_c0_g1/TRINITY_DN21399_c0_g2/TRINITY_DN1765_c2_g1/TRINITY_DN3816_c0_g1/TRINITY_DN12463_c0_g1/TRINITY_DN9041_c0_g1/TRINITY_DN3333_c0_g1/TRINITY_DN7200_c0_g2/TRINITY_DN9041_c0_g2 | 8 |
| GO:0046328 | regulation of JNK cascade     | 8/2626 | 17/33142 | $1.95 \times 10^{-5}$ | 0.000333 | 0.000249 |                                                                                                                                                                                                                                                                                                                                                                                                                                                                                                                                                                                                                                                                                                                                                                                                          | 8 |

|            |                                      |         |          |                       |          |          |                                                                                                                                                                                                                                                                                                                                                                                                                                                                                                                                                                    |    |
|------------|--------------------------------------|---------|----------|-----------------------|----------|----------|--------------------------------------------------------------------------------------------------------------------------------------------------------------------------------------------------------------------------------------------------------------------------------------------------------------------------------------------------------------------------------------------------------------------------------------------------------------------------------------------------------------------------------------------------------------------|----|
| GO:0018095 | protein polyglutamylation            | 7/2626  | 13/33142 | $2.18 \times 10^{-5}$ | 0.00037  | 0.000277 | TRINITY_DN7196_c0_g1/TRINITY_DN2415_c2_g1/TRINITY_DN16168_c0_g1/TRINITY_DN489_c2_g1/TRINITY_DN9716_c0_g1/TRINITY_DN7469_c2_g1/TRINITY_DN15544_c0_g1                                                                                                                                                                                                                                                                                                                                                                                                                | 7  |
| GO:0007368 | determination of left/right symmetry | 14/2626 | 50/33142 | $2.27 \times 10^{-5}$ | 0.000384 | 0.000287 | TRINITY_DN6327_c1_g1/TRINITY_DN15240_c0_g1/TRINITY_DN7740_c0_g1/TRINITY_DN9451_c0_g1/TRINITY_DN19269_c0_g1/TRINITY_DN85_c0_g1/TRINITY_DN18134_c0_g1/TRINITY_DN9170_c1_g2/TRINITY_DN306_c1_g2/TRINITY_DN5968_c0_g1/TRINITY_DN3299_c0_g1/TRINITY_DN342_c0_g1/TRINITY_DN59259_c0_g1/TRINITY_DN6541_c1_g2/TRINITY_DN6597_c0_g1/TRINITY_DN2738_c0_g1/TRINITY_DN8167_c0_g1/TRINITY_DN8805_c1_g1/TRINITY_DN740_c0_g1/TRINITY_DN2598_c0_g2/TRINITY_DN2654_c0_g1/TRINITY_DN17694_c0_g1/TRINITY_DN14132_c0_g1/TRINITY_DN7687_c0_g1/TRINITY_DN4522_c0_g1/TRINITY_DN4784_c1_g1 | 14 |
| GO:0051290 | protein heterotetramerization        | 12/2626 | 38/33142 | $2.30 \times 10^{-5}$ | 0.000384 | 0.000288 | TRINITY_DN6550_c0_g1/TRINITY_DN10126_c0_g1/TRINITY_DN7196_c0_g1/TRINITY_DN2415_c2_g1/TRINITY_DN16168_c0_g1/TRINITY_DN489_c2_g1/TRINITY_DN9716_c0_g1/TRINITY_DN7469_c2_g1/TRINITY_DN15544_c0_g1                                                                                                                                                                                                                                                                                                                                                                     | 12 |
| GO:0005044 | scavenger receptor activity          | 10/2626 | 27/33142 | $2.30 \times 10^{-5}$ | 0.000384 | 0.000288 | TRINITY_DN6550_c0_g1/TRINITY_DN10126_c0_g1/TRINITY_DN7196_c0_g1/TRINITY_DN2415_c2_g1/TRINITY_DN16168_c0_g1/TRINITY_DN489_c2_g1/TRINITY_DN9716_c0_g1/TRINITY_DN7469_c2_g1/TRINITY_DN15544_c0_g1                                                                                                                                                                                                                                                                                                                                                                     | 10 |

|            |                                                                                                  |         |          |                       |          |          |                                                                                                                                                                                                                                                                                                                                                                                                                                                                                                                                                                                                                                                                                                                                                                                     |    |
|------------|--------------------------------------------------------------------------------------------------|---------|----------|-----------------------|----------|----------|-------------------------------------------------------------------------------------------------------------------------------------------------------------------------------------------------------------------------------------------------------------------------------------------------------------------------------------------------------------------------------------------------------------------------------------------------------------------------------------------------------------------------------------------------------------------------------------------------------------------------------------------------------------------------------------------------------------------------------------------------------------------------------------|----|
| GO:1904315 | transmitter-gated ion channel activity involved in regulation of postsynaptic membrane potential | 9/2626  | 22/33142 | $2.33 \times 10^{-5}$ | 0.000387 | 0.00029  | TY_DN3487_c0_g1/TRINITY_DN5086_c0_g1/TRINITY_DN309_c0_g1/TRINITY_DN8587_c0_g1/TRINITY_DN28478_c0_g1/TRINITY_DN6641_c0_g2/TRINITY_DN6030_c0_g1/TRINITY_DN3178_c0_g1/TRINITY_DN21399_c0_g2/TRINITY_DN16006_c0_g1/TRINITY_DN8355_c0_g1/TRINITY_DN1765_c2_g1/TRINITY_DN3816_c0_g1/TRINITY_DN9041_c0_g1/TRINITY_DN7200_c0_g2/TRINITY_DN9041_c0_g2/TRINITY_DN21399_c0_g1/TRINITY_DN32009_c0_g1/TRINITY_DN7426_c0_g1/TRINITY_DN11954_c0_g1/TRINITY_DN1568_c0_g1/TRINITY_DN306_c1_g2/TRINITY_DN13138_c0_g1/TRINITY_DN974_c0_g1/TRINITY_DN16751_c0_g1/TRINITY_DN4859_c0_g1/TRINITY_DN15324_c1_g1/TRINITY_DN40503_c0_g1/TRINITY_DN15536_c0_g1/TRINITY_DN4137_c2_g1/TRINITY_DN21399_c0_g2/TRINITY_DN1557_c0_g1/TRINITY_DN2738_c0_g1/TRINITY_DN740_c0_g1/TRINITY_DN2598_c0_g2/TRINITY_DN1797_c0 | 9  |
| GO:0001889 | liver development                                                                                | 13/2626 | 44/33142 | $2.35 \times 10^{-5}$ | 0.000389 | 0.000291 |                                                                                                                                                                                                                                                                                                                                                                                                                                                                                                                                                                                                                                                                                                                                                                                     | 13 |
| GO:0043525 | positive regulation of neuron apoptotic process                                                  | 11/2626 | 33/33142 | $2.84 \times 10^{-5}$ | 0.000466 | 0.000349 |                                                                                                                                                                                                                                                                                                                                                                                                                                                                                                                                                                                                                                                                                                                                                                                     | 11 |

|            |                                |         |          |                       |          |         |                                                                                                                                                                                                                                                                                                                                                                                                                                                                                                                                                                                                                                                                                                                                                                                                                                                             |    |
|------------|--------------------------------|---------|----------|-----------------------|----------|---------|-------------------------------------------------------------------------------------------------------------------------------------------------------------------------------------------------------------------------------------------------------------------------------------------------------------------------------------------------------------------------------------------------------------------------------------------------------------------------------------------------------------------------------------------------------------------------------------------------------------------------------------------------------------------------------------------------------------------------------------------------------------------------------------------------------------------------------------------------------------|----|
| GO:0005125 | cytokine activity              | 14/2626 | 51/33142 | $2.90 \times 10^{-5}$ | 0.000468 | 0.00035 | _g1/TRINITY_DN1765_c2_g1/<br>TRINITY_DN3816_c0_g1/TRI<br>NITY_DN9041_c0_g1/TRINIT<br>Y_DN7200_c0_g2/TRINITY_D<br>N9041_c0_g2<br>TRINITY_DN6342_c6_g1/TRI<br>NITY_DN14550_c0_g1/TRINI<br>TY_DN24518_c0_g1/TRINITY<br>_DN9767_c0_g3/TRINITY_DN<br>8330_c0_g1/TRINITY_DN1578<br>5_c0_g1/TRINITY_DN51904_c<br>0_g1/TRINITY_DN37845_c0_g<br>1/TRINITY_DN8330_c0_g2/TR<br>INITY_DN7030_c0_g1/TRINIT<br>Y_DN8681_c0_g1/TRINITY_D<br>N13165_c0_g1/TRINITY_DN1<br>1595_c0_g1/TRINITY_DN1159<br>5_c0_g2<br>TRINITY_DN5310_c0_g2/TRI<br>NITY_DN2244_c1_g1/TRINIT<br>Y_DN1266_c0_g1/TRINITY_D<br>N1120_c0_g2/TRINITY_DN93<br>75_c0_g1/TRINITY_DN15308_<br>c0_g2/TRINITY_DN17565_c0_<br>g1/TRINITY_DN43399_c0_g1/<br>TRINITY_DN27045_c0_g1/TRI<br>NITY_DN12127_c0_g1/TRINI<br>TY_DN446_c1_g1/TRINITY_D<br>N7687_c0_g1/TRINITY_DN75<br>23_c0_g1/TRINITY_DN12958_<br>c0_g1 | 14 |
| GO:0050839 | cell adhesion molecule binding | 14/2626 | 51/33142 | $2.90 \times 10^{-5}$ | 0.000468 | 0.00035 |                                                                                                                                                                                                                                                                                                                                                                                                                                                                                                                                                                                                                                                                                                                                                                                                                                                             | 14 |



|            |                           |         |          |                       |          |          |                                                                                                                                                                                                                                                                                                           |    |
|------------|---------------------------|---------|----------|-----------------------|----------|----------|-----------------------------------------------------------------------------------------------------------------------------------------------------------------------------------------------------------------------------------------------------------------------------------------------------------|----|
| GO:0070402 | NADPH binding             | 14/2626 | 51/33142 | $2.90 \times 10^{-5}$ | 0.000468 | 0.00035  | TRINITY_DN10137_c0_g1/TRINITY_DN58623_c2_g1/TRINITY_DN19001_c0_g1/TRINITY_DN1610_c0_g1/TRINITY_DN23921_c0_g1/TRINITY_DN482_c1_g1/TRINITY_DN29856_c0_g1/TRINITY_DN1549_c0_g1/TRINITY_DN40189_c0_g1/TRINITY_DN484_c0_g1/TRINITY_DN6300_c0_g1/TRINITY_DN244_c3_g1/TRINITY_DN8169_c0_g2/TRINITY_DN61025_c0_g1 | 14 |
| GO:0004017 | adenylate kinase activity | 8/2626  | 18/33142 | $3.26 \times 10^{-5}$ | 0.000523 | 0.000392 | TRINITY_DN7530_c0_g1/TRINITY_DN15793_c0_g2/TRINITY_DN34424_c0_g1/TRINITY_DN10718_c0_g1/TRINITY_DN2881_c0_g1/TRINITY_DN5649_c0_g1/TRINITY_DN38340_c0_g1/TRINITY_DN2881_c0_g2                                                                                                                               | 8  |
| GO:0008144 | drug binding              | 15/2626 | 58/33142 | $3.30 \times 10^{-5}$ | 0.000526 | 0.000393 | TRINITY_DN3991_c0_g1/TRINITY_DN7437_c0_g1/TRINITY_DN6767_c0_g1/TRINITY_DN9333_c0_g1/TRINITY_DN19001_c0_g1/TRINITY_DN2682_c0_g1/TRINITY_DN23921_c0_g1/TRINITY_DN482_c1_g1/TRINITY_DN29856_c0_g1/TRINITY_DN1549_c0_g1/TRINITY_DN40189_c0_g1/TRINITY_DN484_c0_g1/TRINITY_DN10344                             | 15 |

|            |                                                                           |         |           |                       |          |          |                                                                                                                                                                                                                                                                                                                                                                                                                                                                                                                                                                                                                                                                                                                                                         |    |
|------------|---------------------------------------------------------------------------|---------|-----------|-----------------------|----------|----------|---------------------------------------------------------------------------------------------------------------------------------------------------------------------------------------------------------------------------------------------------------------------------------------------------------------------------------------------------------------------------------------------------------------------------------------------------------------------------------------------------------------------------------------------------------------------------------------------------------------------------------------------------------------------------------------------------------------------------------------------------------|----|
| GO:0047117 | enoyl-[acyl-carrier-protein] reductase (NADPH , A-specific) activity      | 10/2626 | 28/33142  | $3.32 \times 10^{-5}$ | 0.000527 | 0.000395 | _c0_g1/TRINITY_DN244_c3_g1/TRINITY_DN61025_c0_g1/TRINITY_DN606_c3_g1/TRINITY_DN19001_c0_g1/TRINITY_DN23921_c0_g1/TRINITY_DN482_c1_g1/TRINITY_DN29856_c0_g1/TRINITY_DN1549_c0_g1/TRINITY_DN40189_c0_g1/TRINITY_DN484_c0_g1/TRINITY_DN244_c3_g1/TRINITY_DN61025_c0_g1/TRINITY_DN6342_c6_g1/TRINITY_DN402_c1_g1/TRINITY_DN5956_c5_g1/TRINITY_DN2051_c0_g1/TRINITY_DN14550_c0_g1/TRINITY_DN5216_c1_g1/TRINITY_DN24518_c0_g1/TRINITY_DN8330_c0_g1/TRINITY_DN15785_c0_g1/TRINITY_DN4768_c0_g1/TRINITY_DN51904_c0_g1/TRINITY_DN479_c0_g2/TRINITY_DN8330_c0_g2/TRINITY_DN6677_c0_g1/TRINITY_DN7030_c0_g1/TRINITY_DN5912_c0_g1/TRINITY_DN68176_c0_g1/TRINITY_DN4326_c0_g1/TRINITY_DN3238_c0_g1/TRINITY_DN13165_c0_g1/TRINITY_DN11595_c0_g1/TRINITY_DN11595_c0_g2 | 10 |
| GO:0051607 | defense response to virus                                                 | 22/2626 | 108/33142 | $3.37 \times 10^{-5}$ | 0.000532 | 0.000399 | TRINITY_DN17778_c0_g1/TRINITY_DN14379_c0_g1/TRINITY_DN11595_c0_g2                                                                                                                                                                                                                                                                                                                                                                                                                                                                                                                                                                                                                                                                                       | 22 |
| GO:0007189 | adenylate cyclase-activating G protein-coupled receptor signaling pathway | 11/2626 | 34/33142  | $3.90 \times 10^{-5}$ | 0.000593 | 0.000444 |                                                                                                                                                                                                                                                                                                                                                                                                                                                                                                                                                                                                                                                                                                                                                         | 11 |

|            |                                                      |        |          |                       |          |          |                                                                                                                                                                                                                                                                                                                               |   |
|------------|------------------------------------------------------|--------|----------|-----------------------|----------|----------|-------------------------------------------------------------------------------------------------------------------------------------------------------------------------------------------------------------------------------------------------------------------------------------------------------------------------------|---|
| GO:0018833 | DDT-dehydrochlorinase activity                       | 6/2626 | 10/33142 | $3.91 \times 10^{-5}$ | 0.000593 | 0.000444 | TY_DN7048_c0_g1/TRINITY_DN20653_c0_g1/TRINITY_DN20653_c0_g4/TRINITY_DN6839_c2_g1/TRINITY_DN58254_c0_g1/TRINITY_DN58043_c0_g1/TRINITY_DN20653_c0_g2/TRINITY_DN2285_c0_g1/TRINITY_DN8692_c0_g1/TRINITY_DN2458_c0_g2/TRINITY_DN2458_c0_g1/TRINITY_DN12544_c0_g1/TRINITY_DN10967_c0_g2/TRINITY_DN43074_c0_g1/TRINITY_DN8671_c0_g1 | 6 |
| GO:0048169 | regulation of long-term neuronal synaptic plasticity | 6/2626 | 10/33142 | $3.91 \times 10^{-5}$ | 0.000593 | 0.000444 | TRINITY_DN21399_c0_g2/TRINITY_DN1765_c2_g1/TRINITY_DN3816_c0_g1/TRINITY_DN9041_c0_g1/TRINITY_DN7200_c0_g2/TRINITY_DN9041_c0_g2                                                                                                                                                                                                | 6 |
| GO:0050806 | positive regulation of synaptic transmission         | 6/2626 | 10/33142 | $3.91 \times 10^{-5}$ | 0.000593 | 0.000444 | TRINITY_DN21399_c0_g2/TRINITY_DN1765_c2_g1/TRINITY_DN3816_c0_g1/TRINITY_DN9041_c0_g1/TRINITY_DN7200_c0_g2/TRINITY_DN9041_c0_g2                                                                                                                                                                                                | 6 |
| GO:0060122 | inner ear receptor cell stereocilium organization    | 6/2626 | 10/33142 | $3.91 \times 10^{-5}$ | 0.000593 | 0.000444 | TRINITY_DN9358_c0_g1/TRINITY_DN6174_c0_g1/TRINITY_DN47_c0_g1/TRINITY_DN306_c1_g2/TRINITY_DN2746_c0_g1/TRINITY_DN9168_c0_g2                                                                                                                                                                                                    | 6 |

|            |                                                                |         |          |                       |          |          |                                                                                                                                                                                                                                                                                       |    |
|------------|----------------------------------------------------------------|---------|----------|-----------------------|----------|----------|---------------------------------------------------------------------------------------------------------------------------------------------------------------------------------------------------------------------------------------------------------------------------------------|----|
| GO:0097225 | sperm midpiece                                                 | 6/2626  | 10/33142 | $3.91 \times 10^{-5}$ | 0.000593 | 0.000444 | TRINITY_DN3991_c0_g1/TRINITY_DN954_c0_g1/TRINITY_DN36153_c0_g3/TRINITY_DN2682_c0_g1/TRINITY_DN22905_c0_g1/TRINITY_DN11886_c0_g1                                                                                                                                                       | 6  |
| GO:1904322 | cellular response to forskolin                                 | 6/2626  | 10/33142 | $3.91 \times 10^{-5}$ | 0.000593 | 0.000444 | TRINITY_DN17778_c0_g1/TRINITY_DN20653_c0_g1/TRINITY_DN3713_c1_g1/TRINITY_DN20653_c0_g4/TRINITY_DN6839_c2_g1/TRINITY_DN20653_c0_g2                                                                                                                                                     | 6  |
| GO:0030317 | flagellated sperm motility                                     | 13/2626 | 46/33142 | $3.97 \times 10^{-5}$ | 0.000596 | 0.000446 | TRINITY_DN6657_c0_g1/TRINITY_DN19725_c0_g1/TRINITY_DN11686_c1_g1/TRINITY_DN7740_c0_g1/TRINITY_DN9451_c0_g1/TRINITY_DN1979_c0_g2/TRINITY_DN6610_c0_g1/TRINITY_DN6323_c1_g1/TRINITY_DN7737_c0_g1/TRINITY_DN18134_c0_g1/TRINITY_DN2725_c0_g1/TRINITY_DN30782_c0_g2/TRINITY_DN59259_c0_g1 | 13 |
| GO:0046426 | negative regulation of receptor signaling pathway via JAK-STAT | 13/2626 | 46/33142 | $3.97 \times 10^{-5}$ | 0.000596 | 0.000446 | TRINITY_DN6342_c6_g1/TRINITY_DN14550_c0_g1/TRINITY_DN24518_c0_g1/TRINITY_DN2476_c1_g1/TRINITY_DN8330_c0_g1/TRINITY_DN15785_c0_g1/TRINITY_DN51904_c0_g1/TRINITY_DN8330_c0_g2/TRINITY_DN7030_c0_g1/TRI                                                                                  | 13 |

|            |                                                    |        |          |                       |          |          |                                                                                                                                                                                                                                              |   |
|------------|----------------------------------------------------|--------|----------|-----------------------|----------|----------|----------------------------------------------------------------------------------------------------------------------------------------------------------------------------------------------------------------------------------------------|---|
| GO:0019228 | neuronal action potential                          | 7/2626 | 14/33142 | $4.05 \times 10^{-5}$ | 0.000596 | 0.000446 | NITY_DN13165_c0_g1/TRINITY_DN11595_c0_g1/TRINITY_DN11595_c0_g2/TRINITY_DN16327_c0_g2<br>TRINITY_DN21399_c0_g2/TRINITY_DN1765_c2_g1/TRINITY_DN3816_c0_g1/TRINITY_DN9041_c0_g1/TRINITY_DN17398_c0_g2/TRINITY_DN7200_c0_g2/TRINITY_DN9041_c0_g2 | 7 |
| GO:0019367 | fatty acid elongation , saturated fatty acid       | 7/2626 | 14/33142 | $4.05 \times 10^{-5}$ | 0.000596 | 0.000446 | TRINITY_DN5032_c1_g1/TRINITY_DN1854_c0_g2/TRINITY_DN7107_c0_g1/TRINITY_DN12176_c0_g1/TRINITY_DN34926_c1_g1/TRINITY_DN10258_c0_g1/TRINITY_DN13730_c0_g1                                                                                       | 7 |
| GO:0034626 | fatty acid elongation , polyunsaturated fatty acid | 7/2626 | 14/33142 | $4.05 \times 10^{-5}$ | 0.000596 | 0.000446 | TRINITY_DN5032_c1_g1/TRINITY_DN1854_c0_g2/TRINITY_DN7107_c0_g1/TRINITY_DN12176_c0_g1/TRINITY_DN34926_c1_g1/TRINITY_DN10258_c0_g1/TRINITY_DN13730_c0_g1                                                                                       | 7 |
| GO:0060080 | inhibitory postsynaptic potential                  | 7/2626 | 14/33142 | $4.05 \times 10^{-5}$ | 0.000596 | 0.000446 | TRINITY_DN21399_c0_g2/TRINITY_DN1765_c2_g1/TRINITY_DN3816_c0_g1/TRINITY_DN9041_c0_g1/TRINITY_DN15930_c0_g1/TRINITY_DN7200_c0_g2/TRINITY_DN9041_c0_g2                                                                                         | 7 |

|            |                                                     |         |          |                       |          |          |                                                                                                                                                                                                                                                                                                                                                                                                                                                                                                                                                                            |    |
|------------|-----------------------------------------------------|---------|----------|-----------------------|----------|----------|----------------------------------------------------------------------------------------------------------------------------------------------------------------------------------------------------------------------------------------------------------------------------------------------------------------------------------------------------------------------------------------------------------------------------------------------------------------------------------------------------------------------------------------------------------------------------|----|
| GO:0015630 | microtubule cytoskeleton                            | 16/2626 | 66/33142 | $4.32 \times 10^{-5}$ | 0.000632 | 0.000473 | TRINITY_DN16600_c0_g1/TRINITY_DN3245_c0_g1/TRINITY_DN7740_c0_g1/TRINITY_DN4544_c0_g1/TRINITY_DN4759_c0_g1/TRINITY_DN15133_c0_g1/TRINITY_DN3665_c0_g1/TRINITY_DN10569_c0_g2/TRINITY_DN1699_c1_g1/TRINITY_DN12133_c0_g1/TRINITY_DN2869_c2_g1/TRINITY_DN17984_c0_g1/TRINITY_DN22883_c0_g1/TRINITY_DN26007_c0_g2/TRINITY_DN59259_c0_g1/TRINITY_DN5922_c0_g1/TRINITY_DN606_c3_g1/TRINITY_DN19001_c0_g1/TRINITY_DN23921_c0_g1/TRINITY_DN482_c1_g1/TRINITY_DN29856_c0_g1/TRINITY_DN1549_c0_g1/TRINITY_DN40189_c0_g1/TRINITY_DN484_c0_g1/TRINITY_DN244_c3_g1/TRINITY_DN61025_c0_g1 | 16 |
| GO:0004313 | [acyl-carrier-protein] S-acetyltransferase activity | 10/2626 | 29/33142 | $4.71 \times 10^{-5}$ | 0.000682 | 0.000511 | TRINITY_DN9281_c0_g1/TRINITY_DN19001_c0_g1/TRINITY_DN23921_c0_g1/TRINITY_DN482_c1_g1/TRINITY_DN29856_c0_g1/TRINITY_DN1549_c0_g1/TRINITY_DN40189_c0_g1/TRINITY_DN484_c0_g1/TRINITY_DN244_c3_g1/TRINITY_DN61025_c0_g1                                                                                                                                                                                                                                                                                                                                                        | 10 |
| GO:0006084 | acetyl-CoA metabolic process                        | 10/2626 | 29/33142 | $4.71 \times 10^{-5}$ | 0.000682 | 0.000511 | TRINITY_DN9281_c0_g1/TRINITY_DN19001_c0_g1/TRINITY_DN23921_c0_g1/TRINITY_DN482_c1_g1/TRINITY_DN29856_c0_g1/TRINITY_DN1549_c0_g1/TRINITY_DN40189_c0_g1/TRINITY_DN484_c0_g1/TRINITY_DN244_c3_g1/TRINITY_DN61025_c0_g1                                                                                                                                                                                                                                                                                                                                                        | 10 |

|            |                                        |         |          |                       |          |          |                                                                                                                                                                                                                                                                                                                                                                                                                                                                                                                                                                                                                                                                                                                                                  |    |
|------------|----------------------------------------|---------|----------|-----------------------|----------|----------|--------------------------------------------------------------------------------------------------------------------------------------------------------------------------------------------------------------------------------------------------------------------------------------------------------------------------------------------------------------------------------------------------------------------------------------------------------------------------------------------------------------------------------------------------------------------------------------------------------------------------------------------------------------------------------------------------------------------------------------------------|----|
| GO:0009897 | external side of plasma membrane       | 15/2626 | 60/33142 | $5.06 \times 10^{-5}$ | 0.00073  | 0.000546 | TRINITY_DN3991_c0_g1/TRINITY_DN7437_c0_g1/TRINITY_DN22536_c0_g1/TRINITY_DN7048_c0_g1/TRINITY_DN743_c0_g1/TRINITY_DN200_c0_g2/TRINITY_DN479_c0_g2/TRINITY_DN1765_c2_g1/TRINITY_DN2682_c0_g1/TRINITY_DN10757_c0_g1/TRINITY_DN2292_c2_g1/TRINITY_DN5968_c0_g1/TRINITY_DN7687_c0_g1/TRINITY_DN12958_c0_g1/TRINITY_DN38748_c0_g1/TRINITY_DN21399_c0_g2/TRINITY_DN11938_c0_g1/TRINITY_DN1765_c2_g1/TRINITY_DN3816_c0_g1/TRINITY_DN9041_c0_g1/TRINITY_DN7200_c0_g2/TRINITY_DN273_c1_g1/TRINITY_DN9041_c0_g2/TRINITY_DN22536_c0_g1/TRINITY_DN10890_c0_g1/TRINITY_DN7582_c0_g1/TRINITY_DN15335_c0_g1/TRINITY_DN10159_c1_g1/TRINITY_DN6957_c0_g1/TRINITY_DN14429_c0_g1/TRINITY_DN6641_c0_g2/TRINITY_DN6641_c0_g1/TRINITY_DN2292_c2_g1/TRINITY_DN5802_c0_g1 | 15 |
| GO:0098686 | hippocampal mossy fiber to CA3 synapse | 8/2626  | 19/33142 | $5.24 \times 10^{-5}$ | 0.000751 | 0.000562 | TRINITY_DN1765_c2_g1/TRINITY_DN3816_c0_g1/TRINITY_DN9041_c0_g1/TRINITY_DN7200_c0_g2/TRINITY_DN273_c1_g1/TRINITY_DN9041_c0_g2                                                                                                                                                                                                                                                                                                                                                                                                                                                                                                                                                                                                                     | 8  |
| GO:0009950 | dorsal/ventral axis specification      | 11/2626 | 35/33142 | $5.28 \times 10^{-5}$ | 0.000751 | 0.000562 | TRINITY_DN22536_c0_g1/TRINITY_DN10890_c0_g1/TRINITY_DN7582_c0_g1/TRINITY_DN15335_c0_g1/TRINITY_DN10159_c1_g1/TRINITY_DN6957_c0_g1/TRINITY_DN14429_c0_g1/TRINITY_DN6641_c0_g2/TRINITY_DN6641_c0_g1/TRINITY_DN2292_c2_g1/TRINITY_DN5802_c0_g1                                                                                                                                                                                                                                                                                                                                                                                                                                                                                                      | 11 |
| GO:0033344 | cholesterol efflux                     | 9/2626  | 24/33142 | $5.29 \times 10^{-5}$ | 0.000751 | 0.000562 | TRINITY_DN8493_c0_g1/TRINITY_DN5364_c0_g1/TRINITY_DN5802_c0_g1                                                                                                                                                                                                                                                                                                                                                                                                                                                                                                                                                                                                                                                                                   | 9  |

|            |                                          |         |          |                       |          |          |                                                                                                                                                                                                                                                                                                                                                                                                                                                                                                                                                                                                                                                                                                                                                                                          |    |
|------------|------------------------------------------|---------|----------|-----------------------|----------|----------|------------------------------------------------------------------------------------------------------------------------------------------------------------------------------------------------------------------------------------------------------------------------------------------------------------------------------------------------------------------------------------------------------------------------------------------------------------------------------------------------------------------------------------------------------------------------------------------------------------------------------------------------------------------------------------------------------------------------------------------------------------------------------------------|----|
| GO:0043065 | positive regulation of apoptotic process | 20/2626 | 96/33142 | $5.40 \times 10^{-5}$ | 0.000763 | 0.000571 | Y_DN7048_c0_g1/TRINITY_DN5086_c0_g1/TRINITY_DN757_c0_g1/TRINITY_DN7045_c1_g1/TRINITY_DN333_c0_g1/TRINITY_DN38748_c0_g1/TRINITY_DN8292_c0_g1/TRINITY_DN3991_c0_g1/TRINITY_DN7582_c0_g1/TRINITY_DN1990_c0_g1/TRINITY_DN4544_c0_g1/TRINITY_DN17487_c0_g1/TRINITY_DN6485_c0_g1/TRINITY_DN5951_c0_g4/TRINITY_DN7131_c0_g1/TRINITY_DN1797_c0_g1/TRINITY_DN11938_c0_g1/TRINITY_DN2682_c0_g1/TRINITY_DN3665_c0_g1/TRINITY_DN10145_c1_g1/TRINITY_DN5120_c0_g1/TRINITY_DN4326_c0_g1/TRINITY_DN3238_c0_g1/TRINITY_DN23722_c0_g1/TRINITY_DN6505_c0_g1/TRINITY_DN26727_c0_g1/TRINITY_DN7471_c0_g1/TRINITY_DN7384_c0_g1/TRINITY_DN2458_c0_g2/TRINITY_DN42262_c0_g1/TRINITY_DN2458_c0_g1/TRINITY_DN3007_c0_g1/TRINITY_DN2779_c1_g2/TRINITY_DN12544_c0_g1/TRINITY_DN5646_c0_g1/TRINITY_DN10967_c0_g2/TRI | 20 |
| GO:0006749 | glutathione metabolic process            | 15/2626 | 61/33142 | $6.23 \times 10^{-5}$ | 0.000875 | 0.000655 |                                                                                                                                                                                                                                                                                                                                                                                                                                                                                                                                                                                                                                                                                                                                                                                          | 15 |



|            |                                                      |         |          |                       |          |          |                                                                                                                                                                                                                                                                                                                                                                                                                                                                                                                                                                                                                                                                                                                                                   |    |
|------------|------------------------------------------------------|---------|----------|-----------------------|----------|----------|---------------------------------------------------------------------------------------------------------------------------------------------------------------------------------------------------------------------------------------------------------------------------------------------------------------------------------------------------------------------------------------------------------------------------------------------------------------------------------------------------------------------------------------------------------------------------------------------------------------------------------------------------------------------------------------------------------------------------------------------------|----|
| GO:0004320 | oleoyl-[acyl-carrier-protein] hydrolase activity     | 10/2626 | 30/33142 | $6.57 \times 10^{-5}$ | 0.000918 | 0.000687 | NITY_DN2779_c1_g3/TRINITY_DN13353_c0_g1/TRINITY_DN1118_c0_g1/TRINITY_DN3942_c0_g1/TRINITY_DN43074_c0_g1/TRINITY_DN8671_c0_g1<br>TRINITY_DN606_c3_g1/TRINITY_DN19001_c0_g1/TRINITY_DN23921_c0_g1/TRINITY_DN482_c1_g1/TRINITY_DN29856_c0_g1/TRINITY_DN1549_c0_g1/TRINITY_DN40189_c0_g1/TRINITY_DN484_c0_g1/TRINITY_DN244_c3_g1/TRINITY_DN61025_c0_g1<br>TRINITY_DN5032_c1_g1/TRINITY_DN1854_c0_g2/TRINITY_DN7107_c0_g1/TRINITY_DN12176_c0_g1/TRINITY_DN34926_c1_g1/TRINITY_DN10258_c0_g1/TRINITY_DN13730_c0_g1<br>TRINITY_DN5006_c0_g2/TRINITY_DN19269_c0_g1/TRINITY_DN11340_c0_g1/TRINITY_DN13406_c0_g1/TRINITY_DN5875_c0_g1/TRINITY_DN306_c1_g2/TRINITY_DN9168_c0_g2<br>TRINITY_DN606_c3_g1/TRINITY_DN4958_c0_g1/TRINITY_DN6834_c2_g3/TRINITY_DN1 | 10 |
| GO:0009922 | fatty acid elongase activity                         | 7/2626  | 15/33142 | $7.08 \times 10^{-5}$ | 0.000979 | 0.000733 |                                                                                                                                                                                                                                                                                                                                                                                                                                                                                                                                                                                                                                                                                                                                                   | 7  |
| GO:0097542 | ciliary tip                                          | 7/2626  | 15/33142 | $7.08 \times 10^{-5}$ | 0.000979 | 0.000733 |                                                                                                                                                                                                                                                                                                                                                                                                                                                                                                                                                                                                                                                                                                                                                   | 7  |
| GO:0102131 | 3-oxo-glutaryl-[acp] methyl ester reductase activity | 15/2626 | 62/33142 | $7.62 \times 10^{-5}$ | 0.001038 | 0.000777 |                                                                                                                                                                                                                                                                                                                                                                                                                                                                                                                                                                                                                                                                                                                                                   | 15 |

|            |                                                      |         |          |                       |          |          |                                                                                                                                                                                                                                                                                                                                                                                                                                                                                                                                                                                                                                                                                                                                                                                    |    |
|------------|------------------------------------------------------|---------|----------|-----------------------|----------|----------|------------------------------------------------------------------------------------------------------------------------------------------------------------------------------------------------------------------------------------------------------------------------------------------------------------------------------------------------------------------------------------------------------------------------------------------------------------------------------------------------------------------------------------------------------------------------------------------------------------------------------------------------------------------------------------------------------------------------------------------------------------------------------------|----|
| GO:0102132 | 3-oxo-pimeloyl-[acp] methyl ester reductase activity | 15/2626 | 62/33142 | $7.62 \times 10^{-5}$ | 0.001038 | 0.000777 | 9001_c0_g1/TRINITY_DN9765_c0_g1/TRINITY_DN23785_c0_g1/TRINITY_DN23921_c0_g1/TRINITY_DN482_c1_g1/TRINITY_DN29856_c0_g1/TRINITY_DN1549_c0_g1/TRINITY_DN26032_c0_g1/TRINITY_DN40189_c0_g1/TRINITY_DN484_c0_g1/TRINITY_DN244_c3_g1/TRINITY_DN61025_c0_g1/TRINITY_DN606_c3_g1/TRINITY_DN4958_c0_g1/TRINITY_DN6834_c2_g3/TRINITY_DN19001_c0_g1/TRINITY_DN9765_c0_g1/TRINITY_DN23785_c0_g1/TRINITY_DN23921_c0_g1/TRINITY_DN482_c1_g1/TRINITY_DN29856_c0_g1/TRINITY_DN1549_c0_g1/TRINITY_DN26032_c0_g1/TRINITY_DN40189_c0_g1/TRINITY_DN484_c0_g1/TRINITY_DN244_c3_g1/TRINITY_DN61025_c0_g1/TRINITY_DN72971_c0_g1/TRINITY_DN7048_c0_g1/TRINITY_DN4826_c1_g1/TRINITY_DN3732_c0_g1/TRINITY_DN974_c0_g1/TRINITY_DN16751_c0_g1/TRINITY_DN12338_c0_g1/TRINITY_DN43641_c0_g1/TRINITY_DN3026_c1_g1 | 15 |
| GO:0019216 | regulation of lipid metabolic process                | 9/2626  | 25/33142 | $7.69 \times 10^{-5}$ | 0.001038 | 0.000777 |                                                                                                                                                                                                                                                                                                                                                                                                                                                                                                                                                                                                                                                                                                                                                                                    | 9  |

|            |                                                                                   |        |          |                       |          |          |                                                                                                                                                                                                                                                                                                                                                                                                                                                                                                                                                                                                                                                                                                                                                                  |   |
|------------|-----------------------------------------------------------------------------------|--------|----------|-----------------------|----------|----------|------------------------------------------------------------------------------------------------------------------------------------------------------------------------------------------------------------------------------------------------------------------------------------------------------------------------------------------------------------------------------------------------------------------------------------------------------------------------------------------------------------------------------------------------------------------------------------------------------------------------------------------------------------------------------------------------------------------------------------------------------------------|---|
| GO:0032587 | ruffle membrane                                                                   | 9/2626 | 25/33142 | $7.69 \times 10^{-5}$ | 0.001038 | 0.000777 | TRINITY_DN9277_c0_g1/TRINITY_DN4329_c1_g1/TRINITY_DN7045_c1_g1/TRINITY_DN93_c0_g1/TRINITY_DN5362_c0_g1/TRINITY_DN2869_c2_g1/TRINITY_DN30302_c0_g1/TRINITY_DN13875_c0_g1/TRINITY_DN6505_c0_g1/TRINITY_DN21399_c0_g2/TRINITY_DN1557_c0_g1/TRINITY_DN1765_c2_g1/TRINITY_DN3816_c0_g1/TRINITY_DN9041_c0_g1/TRINITY_DN55372_c0_g1/TRINITY_DN7200_c0_g2/TRINITY_DN3238_c0_g1/TRINITY_DN9041_c0_g2/TRINITY_DN2006_c0_g1/TRINITY_DN1478_c1_g3/TRINITY_DN14468_c0_g1/TRINITY_DN10798_c0_g1/TRINITY_DN11056_c1_g1/TRINITY_DN11061_c0_g2/TRINITY_DN17778_c0_g1/TRINITY_DN20653_c0_g1/TRINITY_DN7737_c0_g1/TRINITY_DN20653_c0_g4/TRINITY_DN6839_c2_g1/TRINITY_DN20653_c0_g2/TRINITY_DN9943_c0_g1/TRINITY_DN2841_c0_g1/TRINITY_DN3375_c0_g1/TRINITY_DN15863_c0_g1/TRINITY_DN5 | 9 |
| GO:0051402 | neuron apoptotic process                                                          | 9/2626 | 25/33142 | $7.69 \times 10^{-5}$ | 0.001038 | 0.000777 | TRINITY_DN9277_c0_g1/TRINITY_DN4329_c1_g1/TRINITY_DN7045_c1_g1/TRINITY_DN93_c0_g1/TRINITY_DN5362_c0_g1/TRINITY_DN2869_c2_g1/TRINITY_DN30302_c0_g1/TRINITY_DN13875_c0_g1/TRINITY_DN6505_c0_g1/TRINITY_DN21399_c0_g2/TRINITY_DN1557_c0_g1/TRINITY_DN1765_c2_g1/TRINITY_DN3816_c0_g1/TRINITY_DN9041_c0_g1/TRINITY_DN55372_c0_g1/TRINITY_DN7200_c0_g2/TRINITY_DN3238_c0_g1/TRINITY_DN9041_c0_g2/TRINITY_DN2006_c0_g1/TRINITY_DN1478_c1_g3/TRINITY_DN14468_c0_g1/TRINITY_DN10798_c0_g1/TRINITY_DN11056_c1_g1/TRINITY_DN11061_c0_g2/TRINITY_DN17778_c0_g1/TRINITY_DN20653_c0_g1/TRINITY_DN7737_c0_g1/TRINITY_DN20653_c0_g4/TRINITY_DN6839_c2_g1/TRINITY_DN20653_c0_g2/TRINITY_DN9943_c0_g1/TRINITY_DN2841_c0_g1/TRINITY_DN3375_c0_g1/TRINITY_DN15863_c0_g1/TRINITY_DN5 | 9 |
| GO:0032098 | regulation of appetite                                                            | 6/2626 | 11/33142 | $8.02 \times 10^{-5}$ | 0.001072 | 0.000803 | TRINITY_DN9277_c0_g1/TRINITY_DN4329_c1_g1/TRINITY_DN7045_c1_g1/TRINITY_DN93_c0_g1/TRINITY_DN5362_c0_g1/TRINITY_DN2869_c2_g1/TRINITY_DN30302_c0_g1/TRINITY_DN13875_c0_g1/TRINITY_DN6505_c0_g1/TRINITY_DN21399_c0_g2/TRINITY_DN1557_c0_g1/TRINITY_DN1765_c2_g1/TRINITY_DN3816_c0_g1/TRINITY_DN9041_c0_g1/TRINITY_DN55372_c0_g1/TRINITY_DN7200_c0_g2/TRINITY_DN3238_c0_g1/TRINITY_DN9041_c0_g2/TRINITY_DN2006_c0_g1/TRINITY_DN1478_c1_g3/TRINITY_DN14468_c0_g1/TRINITY_DN10798_c0_g1/TRINITY_DN11056_c1_g1/TRINITY_DN11061_c0_g2/TRINITY_DN17778_c0_g1/TRINITY_DN20653_c0_g1/TRINITY_DN7737_c0_g1/TRINITY_DN20653_c0_g4/TRINITY_DN6839_c2_g1/TRINITY_DN20653_c0_g2/TRINITY_DN9943_c0_g1/TRINITY_DN2841_c0_g1/TRINITY_DN3375_c0_g1/TRINITY_DN15863_c0_g1/TRINITY_DN5 | 6 |
| GO:0061178 | regulation of insulin secretion involved in cellular response to glucose stimulus | 6/2626 | 11/33142 | $8.02 \times 10^{-5}$ | 0.001072 | 0.000803 | TRINITY_DN9277_c0_g1/TRINITY_DN4329_c1_g1/TRINITY_DN7045_c1_g1/TRINITY_DN93_c0_g1/TRINITY_DN5362_c0_g1/TRINITY_DN2869_c2_g1/TRINITY_DN30302_c0_g1/TRINITY_DN13875_c0_g1/TRINITY_DN6505_c0_g1/TRINITY_DN21399_c0_g2/TRINITY_DN1557_c0_g1/TRINITY_DN1765_c2_g1/TRINITY_DN3816_c0_g1/TRINITY_DN9041_c0_g1/TRINITY_DN55372_c0_g1/TRINITY_DN7200_c0_g2/TRINITY_DN3238_c0_g1/TRINITY_DN9041_c0_g2/TRINITY_DN2006_c0_g1/TRINITY_DN1478_c1_g3/TRINITY_DN14468_c0_g1/TRINITY_DN10798_c0_g1/TRINITY_DN11056_c1_g1/TRINITY_DN11061_c0_g2/TRINITY_DN17778_c0_g1/TRINITY_DN20653_c0_g1/TRINITY_DN7737_c0_g1/TRINITY_DN20653_c0_g4/TRINITY_DN6839_c2_g1/TRINITY_DN20653_c0_g2/TRINITY_DN9943_c0_g1/TRINITY_DN2841_c0_g1/TRINITY_DN3375_c0_g1/TRINITY_DN15863_c0_g1/TRINITY_DN5 | 6 |
| GO:0001669 | acrosomal vesicle                                                                 | 8/2626 | 20/33142 | $8.13 \times 10^{-5}$ | 0.001077 | 0.000806 | TRINITY_DN9277_c0_g1/TRINITY_DN4329_c1_g1/TRINITY_DN7045_c1_g1/TRINITY_DN93_c0_g1/TRINITY_DN5362_c0_g1/TRINITY_DN2869_c2_g1/TRINITY_DN30302_c0_g1/TRINITY_DN13875_c0_g1/TRINITY_DN6505_c0_g1/TRINITY_DN21399_c0_g2/TRINITY_DN1557_c0_g1/TRINITY_DN1765_c2_g1/TRINITY_DN3816_c0_g1/TRINITY_DN9041_c0_g1/TRINITY_DN55372_c0_g1/TRINITY_DN7200_c0_g2/TRINITY_DN3238_c0_g1/TRINITY_DN9041_c0_g2/TRINITY_DN2006_c0_g1/TRINITY_DN1478_c1_g3/TRINITY_DN14468_c0_g1/TRINITY_DN10798_c0_g1/TRINITY_DN11056_c1_g1/TRINITY_DN11061_c0_g2/TRINITY_DN17778_c0_g1/TRINITY_DN20653_c0_g1/TRINITY_DN7737_c0_g1/TRINITY_DN20653_c0_g4/TRINITY_DN6839_c2_g1/TRINITY_DN20653_c0_g2/TRINITY_DN9943_c0_g1/TRINITY_DN2841_c0_g1/TRINITY_DN3375_c0_g1/TRINITY_DN15863_c0_g1/TRINITY_DN5 | 8 |



|            |                                    |         |          |                       |          |          |                                                                                                                                                                                                                                                                                                                                                                                                                                                                                                                                                                                                                                                                                                                                                                                                                 |    |
|------------|------------------------------------|---------|----------|-----------------------|----------|----------|-----------------------------------------------------------------------------------------------------------------------------------------------------------------------------------------------------------------------------------------------------------------------------------------------------------------------------------------------------------------------------------------------------------------------------------------------------------------------------------------------------------------------------------------------------------------------------------------------------------------------------------------------------------------------------------------------------------------------------------------------------------------------------------------------------------------|----|
| GO:0003333 | amino acid transmembrane transport | 12/2626 | 43/33142 | $8.96 \times 10^{-5}$ | 0.001145 | 0.000858 | Y_DN36153_c0_g3/TRINITY_DN14383_c0_g1/TRINITY_DN8796_c0_g1/TRINITY_DN7744_c0_g1/TRINITY_DN170_c1_g1/TRINITY_DN2117_c0_g2/TRINITY_DN10783_c0_g1/TRINITY_DN4173_c0_g1/TRINITY_DN3363_c0_g1/TRINITY_DN3352_c0_g2/TRINITY_DN12891_c0_g1/TRINITY_DN4979_c0_g1/TRINITY_DN306_c4_g1/TRINITY_DN1699_c1_g1/TRINITY_DN8043_c0_g1/TRINITY_DN5276_c1_g1/TRINITY_DN144_c0_g1/TRINITY_DN34504_c0_g1/TRINITY_DN2281_c0_g1/TRINITY_DN4000_c0_g1/TRINITY_DN15930_c0_g1/TRINITY_DN23609_c0_g1/TRINITY_DN30782_c0_g2/TRINITY_DN15445_c0_g1/TRINITY_DN4137_c2_g1/TRINITY_DN22707_c1_g1/TRINITY_DN12889_c0_g1/TRINITY_DN6505_c0_g1/TRINITY_DN11152_c0_g1/TRINITY_DN8323_c0_g1/TRINITY_DN3446_c0_g1/TRINITY_DN6519_c0_g1/TRINITY_DN43642_c0_g1/TRINITY_DN4139_c0_g1/TRINITY_DN13394_c0_g1/TRINITY_DN13889_c0_g1/TRINITY_DN8012_c0_g1/ | 12 |
|------------|------------------------------------|---------|----------|-----------------------|----------|----------|-----------------------------------------------------------------------------------------------------------------------------------------------------------------------------------------------------------------------------------------------------------------------------------------------------------------------------------------------------------------------------------------------------------------------------------------------------------------------------------------------------------------------------------------------------------------------------------------------------------------------------------------------------------------------------------------------------------------------------------------------------------------------------------------------------------------|----|

|            |                           |         |          |                       |          |          |                                                                                                                                                                                                                                                                                                                                                                                                                                                                                                                                                                                                                                                                                                                               |    |
|------------|---------------------------|---------|----------|-----------------------|----------|----------|-------------------------------------------------------------------------------------------------------------------------------------------------------------------------------------------------------------------------------------------------------------------------------------------------------------------------------------------------------------------------------------------------------------------------------------------------------------------------------------------------------------------------------------------------------------------------------------------------------------------------------------------------------------------------------------------------------------------------------|----|
| GO:0008344 | adult locomotory behavior | 12/2626 | 43/33142 | $8.96 \times 10^{-5}$ | 0.001145 | 0.000858 | TRINITY_DN6705_c0_g2/TRINITY_DN4307_c0_g1/TRINITY_DN3638_c0_g2/TRINITY_DN12101_c0_g2<br>TRINITY_DN7807_c0_g1/TRINITY_DN1487_c0_g2/TRINITY_DN1748_c0_g1/TRINITY_DN388_c0_g1/TRINITY_DN6076_c0_g1/TRINITY_DN9333_c0_g1/TRINITY_DN1267_c0_g2/TRINITY_DN9532_c0_g1/TRINITY_DN5521_c0_g1/TRINITY_DN8599_c1_g1/TRINITY_DN6745_c0_g1/TRINITY_DN26007_c0_g2<br>TRINITY_DN4644_c0_g1/TRINITY_DN85_c0_g1/TRINITY_DN3732_c0_g1/TRINITY_DN5519_c0_g1/TRINITY_DN10569_c0_g2/TRINITY_DN8662_c1_g1/TRINITY_DN9843_c0_g1/TRINITY_DN40503_c0_g1/TRINITY_DN144_c0_g1/TRINITY_DN5362_c0_g1/TRINITY_DN2281_c0_g1/TRINITY_DN3103_c0_g2/TRINITY_DN14168_c0_g2/TRINITY_DN15445_c0_g1/TRINITY_DN4137_c2_g1/TRINITY_DN3103_c2_g1/TRINITY_DN14850_c0_g1 | 12 |
| GO:0007517 | muscle organ development  | 17/2626 | 77/33142 | $8.99 \times 10^{-5}$ | 0.001145 | 0.000858 | TRINITY_DN9358_c0_g1/TRINITY_DN1568_c0_g1/TRINITY_DN14850_c0_g1                                                                                                                                                                                                                                                                                                                                                                                                                                                                                                                                                                                                                                                               | 17 |
| GO:0005902 | microvillus               | 10/2626 | 31/33142 | $9.01 \times 10^{-5}$ | 0.001145 | 0.000858 | TRINITY_DN9358_c0_g1/TRINITY_DN1568_c0_g1/TRINITY_DN14850_c0_g1                                                                                                                                                                                                                                                                                                                                                                                                                                                                                                                                                                                                                                                               | 10 |

|            |                                                     |         |          |                       |          |          |                                                                                                                                                                                                                                                                                                                                                                                                                                                                                                                                                                                                           |    |
|------------|-----------------------------------------------------|---------|----------|-----------------------|----------|----------|-----------------------------------------------------------------------------------------------------------------------------------------------------------------------------------------------------------------------------------------------------------------------------------------------------------------------------------------------------------------------------------------------------------------------------------------------------------------------------------------------------------------------------------------------------------------------------------------------------------|----|
| GO:0016295 | myristoyl-[acyl-carrier-protein] hydrolase activity | 10/2626 | 31/33142 | $9.01 \times 10^{-5}$ | 0.001145 | 0.000858 | Y_DN47_c0_g1/TRINITY_DN5495_c1_g2/TRINITY_DN14381_c0_g1/TRINITY_DN6745_c0_g1/TRINITY_DN22905_c0_g1/TRINITY_DN22607_c0_g1/TRINITY_DN12958_c0_g1/TRINITY_DN2347_c1_g1/TRINITY_DN606_c3_g1/TRINITY_DN19001_c0_g1/TRINITY_DN23921_c0_g1/TRINITY_DN482_c1_g1/TRINITY_DN29856_c0_g1/TRINITY_DN1549_c0_g1/TRINITY_DN40189_c0_g1/TRINITY_DN484_c0_g1/TRINITY_DN244_c3_g1/TRINITY_DN61025_c0_g1/TRINITY_DN606_c3_g1/TRINITY_DN19001_c0_g1/TRINITY_DN23921_c0_g1/TRINITY_DN482_c1_g1/TRINITY_DN29856_c0_g1/TRINITY_DN1549_c0_g1/TRINITY_DN40189_c0_g1/TRINITY_DN484_c0_g1/TRINITY_DN244_c3_g1/TRINITY_DN61025_c0_g1 | 10 |
| GO:0016296 | palmitoyl-[acyl-carrier-protein] hydrolase activity | 10/2626 | 31/33142 | $9.01 \times 10^{-5}$ | 0.001145 | 0.000858 | TRINITY_DN606_c3_g1/TRINITY_DN19001_c0_g1/TRINITY_DN23921_c0_g1/TRINITY_DN482_c1_g1/TRINITY_DN29856_c0_g1/TRINITY_DN1549_c0_g1/TRINITY_DN40189_c0_g1/TRINITY_DN484_c0_g1/TRINITY_DN244_c3_g1/TRINITY_DN61025_c0_g1                                                                                                                                                                                                                                                                                                                                                                                        | 10 |
| GO:0048814 | regulation of dendrite morphogenesis                | 10/2626 | 31/33142 | $9.01 \times 10^{-5}$ | 0.001145 | 0.000858 | TRINITY_DN5239_c1_g2/TRINITY_DN6076_c0_g1/TRINITY_DN6677_c0_g1/TRINITY_DN1178_c2_g1/TRINITY_DN10145_c1_g1/TRINITY_DN9935_c1_g1/TRINITY_DN2475_c0_g1/TRINITY_DN9158_c3_g1/TR                                                                                                                                                                                                                                                                                                                                                                                                                               | 10 |

|            |                                                             |         |           |                       |          |          |                                                                                                                                                                                                                                                                                                                                                                                                                                                                                                                                                                                                                                                                                                                                                                                                        |    |
|------------|-------------------------------------------------------------|---------|-----------|-----------------------|----------|----------|--------------------------------------------------------------------------------------------------------------------------------------------------------------------------------------------------------------------------------------------------------------------------------------------------------------------------------------------------------------------------------------------------------------------------------------------------------------------------------------------------------------------------------------------------------------------------------------------------------------------------------------------------------------------------------------------------------------------------------------------------------------------------------------------------------|----|
| GO:0004316 | 3-oxoacyl-[acyl-carrier-protein] reductase (NADPH) activity | 15/2626 | 63/33142  | $9.27 \times 10^{-5}$ | 0.001169 | 0.000875 | INITY_DN2869_c2_g1/TRINITY_DN709_c0_g1<br>TRINITY_DN606_c3_g1/TRINITY_DN4958_c0_g1/TRINITY_DN6834_c2_g3/TRINITY_DN19001_c0_g1/TRINITY_DN9765_c0_g1/TRINITY_DN23785_c0_g1/TRINITY_DN23921_c0_g1/TRINITY_DN482_c1_g1/TRINITY_DN29856_c0_g1/TRINITY_DN1549_c0_g1/TRINITY_DN26032_c0_g1/TRINITY_DN40189_c0_g1/TRINITY_DN484_c0_g1/TRINITY_DN244_c3_g1/TRINITY_DN61025_c0_g1/TRINITY_DN5056_c0_g1/TRINITY_DN7048_c0_g1/TRINITY_DN2629_c0_g1/TRINITY_DN5495_c1_g2/TRINITY_DN14381_c0_g1/TRINITY_DN9333_c0_g1/TRINITY_DN974_c0_g1/TRINITY_DN8278_c2_g1/TRINITY_DN6638_c2_g1/TRINITY_DN4859_c0_g1/TRINITY_DN26376_c0_g1/TRINITY_DN15536_c0_g1/TRINITY_DN6985_c0_g1/TRINITY_DN12958_c0_g1/TRINITY_DN5788_c1_g1/TRINITY_DN1487_c0_g2/TRINITY_DN4783_c0_g1/TRINITY_DN7740_c0_g1/TRINITY_DN9219_c0_g1/TRINITY_DN45 | 15 |
| GO:0007584 | response to nutrient                                        | 15/2626 | 63/33142  | $9.27 \times 10^{-5}$ | 0.001169 | 0.000875 |                                                                                                                                                                                                                                                                                                                                                                                                                                                                                                                                                                                                                                                                                                                                                                                                        | 15 |
| GO:0007420 | brain development                                           | 23/2626 | 124/33142 | 0.000105              | 0.001311 | 0.000982 |                                                                                                                                                                                                                                                                                                                                                                                                                                                                                                                                                                                                                                                                                                                                                                                                        | 23 |



|            |                                                                          |         |           |          |          |          |                                                                                                                                                                                                                                                                                                                                                                                                                                                                                                                                                                                                                                                                                                                                                                                                             |    |
|------------|--------------------------------------------------------------------------|---------|-----------|----------|----------|----------|-------------------------------------------------------------------------------------------------------------------------------------------------------------------------------------------------------------------------------------------------------------------------------------------------------------------------------------------------------------------------------------------------------------------------------------------------------------------------------------------------------------------------------------------------------------------------------------------------------------------------------------------------------------------------------------------------------------------------------------------------------------------------------------------------------------|----|
| GO:0000981 | DNA-binding transcription factor activity,<br>RNA polymerase II-specific | 37/2626 | 244/33142 | 0.000105 | 0.001313 | 0.000983 | 44_c0_g1/TRINITY_DN5239_c1_g2/TRINITY_DN7530_c0_g1/TRINITY_DN17663_c0_g1/TRINITY_DN5781_c0_g1/TRINITY_DN480_c0_g1/TRINITY_DN9676_c0_g1/TRINITY_DN1797_c0_g1/TRINITY_DN306_c1_g2/TRINITY_DN2095_c0_g1/TRINITY_DN23750_c0_g1/TRINITY_DN4859_c0_g1/TRINITY_DN637_c0_g1/TRINITY_DN59259_c0_g1/TRINITY_DN7318_c0_g1/TRINITY_DN13354_c0_g1/TRINITY_DN2285_c0_g1/TRINITY_DN8116_c0_g1/TRINITY_DN4381_c0_g1/TRINITY_DN1893_c0_g1/TRINITY_DN219_c3_g1/TRINITY_DN10890_c0_g1/TRINITY_DN1695_c0_g1/TRINITY_DN5878_c0_g1/TRINITY_DN8236_c0_g1/TRINITY_DN22837_c0_g1/TRINITY_DN4789_c0_g1/TRINITY_DN14383_c0_g1/TRINITY_DN13176_c0_g1/TRINITY_DN3284_c0_g1/TRINITY_DN85_c0_g1/TRINITY_DN170_c1_g1/TRINITY_DN3713_c1_g1/TRINITY_DN49948_c0_g1/TRINITY_DN1541_c0_g1/TRINITY_DN5296_c0_g1/TRINITY_DN3352_c0_g2/TRINITY_DN12 | 37 |
|------------|--------------------------------------------------------------------------|---------|-----------|----------|----------|----------|-------------------------------------------------------------------------------------------------------------------------------------------------------------------------------------------------------------------------------------------------------------------------------------------------------------------------------------------------------------------------------------------------------------------------------------------------------------------------------------------------------------------------------------------------------------------------------------------------------------------------------------------------------------------------------------------------------------------------------------------------------------------------------------------------------------|----|





Y\_DN219\_c3\_g1/TRINITY\_D  
N11739\_c0\_g1/TRINITY\_DN1  
0890\_c0\_g1/TRINITY\_DN439\_  
c0\_g1/TRINITY\_DN5239\_c1\_g  
2/TRINITY\_DN8236\_c0\_g1/TR  
INITY\_DN21131\_c0\_g2/TRINI  
TY\_DN22837\_c0\_g1/TRINITY  
\_DN4789\_c0\_g1/TRINITY\_DN  
12504\_c0\_g1/TRINITY\_DN361  
53\_c0\_g3/TRINITY\_DN11693\_  
c0\_g2/TRINITY\_DN578\_c1\_g1  
/TRINITY\_DN4644\_c0\_g1/TRI  
NITY\_DN14383\_c0\_g1/TRINI  
TY\_DN13176\_c0\_g1/TRINITY  
\_DN3284\_c0\_g1/TRINITY\_DN  
29267\_c0\_g2/TRINITY\_DN373  
2\_c0\_g1/TRINITY\_DN3713\_c1  
\_g1/TRINITY\_DN45371\_c0\_g1  
/TRINITY\_DN5296\_c0\_g1/TRI  
NITY\_DN12891\_c0\_g1/TRINI  
TY\_DN9245\_c0\_g1/TRINITY\_  
DN2095\_c0\_g1/TRINITY\_DN3  
722\_c0\_g1/TRINITY\_DN12413  
\_c0\_g1/TRINITY\_DN2431\_c0\_  
g1/TRINITY\_DN13176\_c0\_g2/  
TRINITY\_DN1111\_c0\_g1/TRI  
NITY\_DN29974\_c0\_g1/TRINI  
TY\_DN40503\_c0\_g1/TRINITY  
\_DN10400\_c0\_g1/TRINITY\_D  
N51821\_c0\_g1/TRINITY\_DN1  
2512\_c0\_g1/TRINITY\_DN489\_  
c1\_g1/TRINITY\_DN16221\_c0\_

|            |                              |         |           |          |          |          |                                                                                                                                                                                                                                                                                                                                                                                                                                                                                                                                                                                                                                                                                                                                                                                |    |
|------------|------------------------------|---------|-----------|----------|----------|----------|--------------------------------------------------------------------------------------------------------------------------------------------------------------------------------------------------------------------------------------------------------------------------------------------------------------------------------------------------------------------------------------------------------------------------------------------------------------------------------------------------------------------------------------------------------------------------------------------------------------------------------------------------------------------------------------------------------------------------------------------------------------------------------|----|
| GO:000943  | retrotransposon nucleocapsid | 20/2626 | 101/33142 | 0.000114 | 0.001404 | 0.001052 | g1/TRINITY_DN3609_c1_g1/TRINITY_DN10344_c0_g1/TRINITY_DN3093_c0_g1/TRINITY_DN6589_c0_g1/TRINITY_DN17100_c0_g1<br>TRINITY_DN6070_c0_g1/TRINITY_DN20392_c0_g1/TRINITY_DN2636_c0_g2/TRINITY_DN1830_c0_g2/TRINITY_DN20442_c0_g1/TRINITY_DN23043_c0_g3/TRINITY_DN1326_c1_g1/TRINITY_DN8531_c0_g1/TRINITY_DN1252_c0_g1/TRINITY_DN60975_c0_g1/TRINITY_DN30295_c0_g1/TRINITY_DN3766_c0_g1/TRINITY_DN30055_c0_g1/TRINITY_DN57331_c0_g1/TRINITY_DN16018_c0_g1/TRINITY_DN12254_c0_g3/TRINITY_DN1618_c0_g1/TRINITY_DN1589_c5_g1/TRINITY_DN9422_c0_g1/TRINITY_DN11438_c0_g1<br>TRINITY_DN72971_c0_g1/TRINITY_DN15487_c0_g1/TRINITY_DN4826_c1_g1/TRINITY_DN15468_c0_g1/TRINITY_DN5431_c0_g1/TRINITY_DN43641_c0_g1/TRINITY_DN18471_c0_g2<br>TRINITY_DN606_c3_g1/TRINITY_DN19001_c0_g1/TRINITY | 20 |
| GO:0042552 | myelination                  | 7/2626  | 16/33142  | 0.000117 | 0.001438 | 0.001077 | TRINITY_DN15468_c0_g1/TRINITY_DN5431_c0_g1/TRINITY_DN43641_c0_g1/TRINITY_DN18471_c0_g2<br>TRINITY_DN606_c3_g1/TRINITY_DN19001_c0_g1/TRINITY                                                                                                                                                                                                                                                                                                                                                                                                                                                                                                                                                                                                                                    | 7  |
| GO:0004312 | fatty acid synthase activity | 10/2626 | 32/33142  | 0.000122 | 0.001449 | 0.001085 | TRINITY_DN606_c3_g1/TRINITY_DN19001_c0_g1/TRINITY                                                                                                                                                                                                                                                                                                                                                                                                                                                                                                                                                                                                                                                                                                                              | 10 |

|            |                                                                   |         |          |          |          |          |                                                                                                                                                                                                                                                                                                                                                                                                                                                                                                                                                                                                                                                                                                                                                                                             |    |
|------------|-------------------------------------------------------------------|---------|----------|----------|----------|----------|---------------------------------------------------------------------------------------------------------------------------------------------------------------------------------------------------------------------------------------------------------------------------------------------------------------------------------------------------------------------------------------------------------------------------------------------------------------------------------------------------------------------------------------------------------------------------------------------------------------------------------------------------------------------------------------------------------------------------------------------------------------------------------------------|----|
| GO:0008146 | sulfotransferase activity                                         | 10/2626 | 32/33142 | 0.000122 | 0.001449 | 0.001085 | _DN23921_c0_g1/TRINITY_DN482_c1_g1/TRINITY_DN29856_c0_g1/TRINITY_DN1549_c0_g1/TRINITY_DN40189_c0_g1/TRINITY_DN484_c0_g1/TRINITY_DN244_c3_g1/TRINITY_DN61025_c0_g1<br>TRINITY_DN44907_c0_g1/TRINITY_DN806_c0_g2/TRINITY_DN12529_c0_g1/TRINITY_DN6957_c0_g1/TRINITY_DN512_c1_g1/TRINITY_DN7730_c0_g4/TRINITY_DN806_c0_g1/TRINITY_DN1017_c0_g1/TRINITY_DN7903_c0_g1/TRINITY_DN3213_c4_g1<br>TRINITY_DN606_c3_g1/TRINITY_DN19001_c0_g1/TRINITY_DN23921_c0_g1/TRINITY_DN482_c1_g1/TRINITY_DN29856_c0_g1/TRINITY_DN1549_c0_g1/TRINITY_DN40189_c0_g1/TRINITY_DN484_c0_g1/TRINITY_DN244_c3_g1/TRINITY_DN61025_c0_g1<br>TRINITY_DN606_c3_g1/TRINITY_DN19001_c0_g1/TRINITY_DN23921_c0_g1/TRINITY_DN482_c1_g1/TRINITY_DN29856_c0_g1/TRINITY_DN1549_c0_g1/TRINITY_DN40189_c0_g1/TRINITY_DN484_c0_g1/TRI | 10 |
| GO:0008659 | (3R)-hydroxymyristoyl-[acyl-carrier-protein] dehydratase activity | 10/2626 | 32/33142 | 0.000122 | 0.001449 | 0.001085 | _DN23921_c0_g1/TRINITY_DN482_c1_g1/TRINITY_DN29856_c0_g1/TRINITY_DN1549_c0_g1/TRINITY_DN40189_c0_g1/TRINITY_DN484_c0_g1/TRINITY_DN244_c3_g1/TRINITY_DN61025_c0_g1<br>TRINITY_DN606_c3_g1/TRINITY_DN19001_c0_g1/TRINITY_DN23921_c0_g1/TRINITY_DN482_c1_g1/TRINITY_DN29856_c0_g1/TRINITY_DN1549_c0_g1/TRINITY_DN40189_c0_g1/TRINITY_DN484_c0_g1/TRINITY_DN244_c3_g1/TRINITY_DN61025_c0_g1<br>TRINITY_DN606_c3_g1/TRINITY_DN19001_c0_g1/TRINITY_DN23921_c0_g1/TRINITY_DN482_c1_g1/TRINITY_DN29856_c0_g1/TRINITY_DN1549_c0_g1/TRINITY_DN40189_c0_g1/TRINITY_DN484_c0_g1/TRI                                                                                                                                                                                                                     | 10 |
| GO:0047451 | 3-hydroxyoctanoyl-[acyl-carrier-protein] dehydratase activity     | 10/2626 | 32/33142 | 0.000122 | 0.001449 | 0.001085 | _DN23921_c0_g1/TRINITY_DN482_c1_g1/TRINITY_DN29856_c0_g1/TRINITY_DN1549_c0_g1/TRINITY_DN40189_c0_g1/TRINITY_DN484_c0_g1/TRI                                                                                                                                                                                                                                                                                                                                                                                                                                                                                                                                                                                                                                                                 | 10 |

|            |                                                       |         |          |          |          |          |                                                                                                                                                                                                                                                                                                                                                                                                                                                                                                                                                                                                                                                                                                                                                                         |    |
|------------|-------------------------------------------------------|---------|----------|----------|----------|----------|-------------------------------------------------------------------------------------------------------------------------------------------------------------------------------------------------------------------------------------------------------------------------------------------------------------------------------------------------------------------------------------------------------------------------------------------------------------------------------------------------------------------------------------------------------------------------------------------------------------------------------------------------------------------------------------------------------------------------------------------------------------------------|----|
| GO:0009953 | dorsal/ventral pattern formation                      | 11/2626 | 38/33142 | 0.000122 | 0.001449 | 0.001085 | NITY_DN244_c3_g1/TRINITY_DN61025_c0_g1<br>TRINITY_DN10890_c0_g1/TRINITY_DN11340_c0_g1/TRINITY_DN10159_c1_g1/TRINITY_DN4173_c0_g1/TRINITY_DN6641_c0_g2/TRINITY_DN306_c1_g2/TRINITY_DN6641_c0_g1/TRINITY_DN2095_c0_g1/TRINITY_DN3717_c0_g1/TRINITY_DN5802_c0_g1/TRINITY_DN13354_c0_g1<br>TRINITY_DN19075_c0_g1/TRINITY_DN6174_c0_g1/TRINITY_DN47_c0_g1/TRINITY_DN31870_c0_g1/TRINITY_DN5459_c0_g1/TRINITY_DN20346_c0_g1/TRINITY_DN2746_c0_g1/TRINITY_DN6945_c0_g2<br>TRINITY_DN7384_c0_g1/TRINITY_DN406_c0_g3/TRINITY_DN42262_c0_g1/TRINITY_DN5049_c0_g1/TRINITY_DN2999_c0_g1/TRINITY_DN406_c0_g2/TRINITY_DN1118_c0_g1/TRINITY_DN42565_c0_g1<br>TRINITY_DN21399_c0_g2/TRINITY_DN11938_c0_g1/TRINITY_DN1765_c2_g1/TRINITY_DN3816_c0_g1/TRINITY_DN1154_c0_g1/TRINITY_DN9041 | 11 |
| GO:0001917 | photoreceptor inner segment                           | 8/2626  | 21/33142 | 0.000122 | 0.001449 | 0.001085 |                                                                                                                                                                                                                                                                                                                                                                                                                                                                                                                                                                                                                                                                                                                                                                         | 8  |
| GO:0010243 | response to organonitrogen compound                   | 8/2626  | 21/33142 | 0.000122 | 0.001449 | 0.001085 |                                                                                                                                                                                                                                                                                                                                                                                                                                                                                                                                                                                                                                                                                                                                                                         | 8  |
| GO:0048172 | regulation of short-term neuronal synaptic plasticity | 8/2626  | 21/33142 | 0.000122 | 0.001449 | 0.001085 |                                                                                                                                                                                                                                                                                                                                                                                                                                                                                                                                                                                                                                                                                                                                                                         | 8  |

|            |                                         |         |          |          |          |          |                                                                                                                                                                                                                                                                                                                                                                                                                                                                                                                                                                                                                                                                                                                                                                                                                     |    |
|------------|-----------------------------------------|---------|----------|----------|----------|----------|---------------------------------------------------------------------------------------------------------------------------------------------------------------------------------------------------------------------------------------------------------------------------------------------------------------------------------------------------------------------------------------------------------------------------------------------------------------------------------------------------------------------------------------------------------------------------------------------------------------------------------------------------------------------------------------------------------------------------------------------------------------------------------------------------------------------|----|
| GO:0007166 | cell surface receptor signaling pathway | 16/2626 | 72/33142 | 0.000132 | 0.00156  | 0.001168 | _c0_g1/TRINITY_DN7200_c0_g2/TRINITY_DN9041_c0_g2<br>TRINITY_DN14379_c0_g1/TRINITY_DN39639_c3_g1/TRINITY_DN938_c2_g1/TRINITY_DN7051_c0_g1/TRINITY_DN30087_c1_g2/TRINITY_DN8257_c0_g1/TRINITY_DN1451_c0_g2/TRINITY_DN10783_c0_g1/TRINITY_DN4391_c0_g1/TRINITY_DN1486_c0_g1/TRINITY_DN1451_c0_g1/TRINITY_DN9642_c1_g2/TRINITY_DN58254_c0_g1/TRINITY_DN58043_c0_g1/TRINITY_DN2285_c0_g1/TRINITY_DN864_c0_g3<br>TRINITY_DN14379_c0_g1/TRINITY_DN3120_c0_g1/TRINITY_DN11100_c0_g1/TRINITY_DN1266_c0_g1/TRINITY_DN2557_c0_g2/TRINITY_DN85_c0_g1/TRINITY_DN1902_c0_g1/TRINITY_DN56782_c0_g1/TRINITY_DN9780_c0_g1/TRINITY_DN93_c0_g1/TRINITY_DN40503_c0_g1/TRINITY_DN2281_c0_g1/TRINITY_DN4137_c2_g1/TRINITY_DN14663_c0_g1/TRINITY_DN2285_c0_g1<br>TRINITY_DN725_c5_g1/TRINITY_DN1691_c0_g2/TRINITY_DN1908_c3_g1/TRINITY_DN9 | 16 |
| GO:0001525 | angiogenesis                            | 15/2626 | 65/33142 | 0.000135 | 0.001593 | 0.001193 |                                                                                                                                                                                                                                                                                                                                                                                                                                                                                                                                                                                                                                                                                                                                                                                                                     | 15 |
| GO:0030017 | sarcomere                               | 12/2626 | 45/33142 | 0.000145 | 0.001689 | 0.001265 |                                                                                                                                                                                                                                                                                                                                                                                                                                                                                                                                                                                                                                                                                                                                                                                                                     | 12 |

|            |                                                 |         |           |          |          |          |                                                                                                                                                                                                                                                                                                                                                                                                                                                                                                                                                                                                                                                                                                                                                                                        |    |
|------------|-------------------------------------------------|---------|-----------|----------|----------|----------|----------------------------------------------------------------------------------------------------------------------------------------------------------------------------------------------------------------------------------------------------------------------------------------------------------------------------------------------------------------------------------------------------------------------------------------------------------------------------------------------------------------------------------------------------------------------------------------------------------------------------------------------------------------------------------------------------------------------------------------------------------------------------------------|----|
| GO:0043524 | negative regulation of neuron apoptotic process | 12/2626 | 45/33142  | 0.000145 | 0.001689 | 0.001265 | 219_c0_g1/TRINITY_DN36153_c0_g3/TRINITY_DN5519_c0_g1/TRINITY_DN5521_c0_g1/TRINITY_DN1174_c0_g1/TRINITY_DN2869_c2_g1/TRINITY_DN17422_c0_g2/TRINITY_DN2168_c3_g1/TRINITY_DN8235_c1_g1<br>TRINITY_DN21399_c0_g2/TRINITY_DN3245_c0_g1/TRINITY_DN1487_c0_g2/TRINITY_DN1765_c2_g1/TRINITY_DN3816_c0_g1/TRINITY_DN9041_c0_g1/TRINITY_DN21152_c0_g1/TRINITY_DN7200_c0_g2/TRINITY_DN9041_c0_g2/TRINITY_DN12889_c0_g1/TRINITY_DN301_c4_g1/TRINITY_DN1908_c0_g1<br>TRINITY_DN7384_c0_g1/TRINITY_DN5886_c0_g1/TRINITY_DN1568_c0_g1/TRINITY_DN7048_c0_g1/TRINITY_DN406_c0_g3/TRINITY_DN4514_c0_g1/TRINITY_DN42262_c0_g1/TRINITY_DN5049_c0_g1/TRINITY_DN23485_c0_g1/TRINITY_DN2999_c0_g1/TRINITY_DN17663_c0_g1/TRINITY_DN10011_c0_g1/TRINITY_DN1852_c2_g1/TRINITY_DN406_c0_g2/TRINITY_DN4859_c0_g1/T | 12 |
| GO:0042493 | response to drug                                | 27/2626 | 160/33142 | 0.000148 | 0.001702 | 0.001274 |                                                                                                                                                                                                                                                                                                                                                                                                                                                                                                                                                                                                                                                                                                                                                                                        | 27 |



|            |                                                   |        |          |         |          |          |                                                                                                                                                                                                                                                                                                                                                                                                    |   |
|------------|---------------------------------------------------|--------|----------|---------|----------|----------|----------------------------------------------------------------------------------------------------------------------------------------------------------------------------------------------------------------------------------------------------------------------------------------------------------------------------------------------------------------------------------------------------|---|
| GO:0030414 | peptidase inhibitor activity                      | 6/2626 | 12/33142 | 0.00015 | 0.001702 | 0.001274 | RINITY_DN33241_c0_g1/TRINITY_DN40503_c0_g1/TRINITY_DN471_c1_g1/TRINITY_DN1118_c0_g1/TRINITY_DN13226_c0_g1/TRINITY_DN6985_c0_g1/TRINITY_DN16317_c0_g1/TRINITY_DN7318_c0_g1/TRINITY_DN42565_c0_g1/TRINITY_DN6589_c0_g1/TRINITY_DN10346_c1_g1/TRINITY_DN5788_c1_g1<br>TRINITY_DN12244_c0_g1/TRINITY_DN3923_c0_g1/TRINITY_DN2018_c1_g1/TRINITY_DN13407_c0_g1/TRINITY_DN4266_c0_g3/TRINITY_DN3554_c0_g1 | 6 |
| GO:0034625 | fatty acid elongation, monounsaturated fatty acid | 6/2626 | 12/33142 | 0.00015 | 0.001702 | 0.001274 | TRINITY_DN5032_c1_g1/TRINITY_DN1854_c0_g2/TRINITY_DN7107_c0_g1/TRINITY_DN12176_c0_g1/TRINITY_DN34926_c1_g1/TRINITY_DN13730_c0_g1                                                                                                                                                                                                                                                                   | 6 |
| GO:0035904 | aorta development                                 | 6/2626 | 12/33142 | 0.00015 | 0.001702 | 0.001274 | TRINITY_DN7437_c0_g1/TRINITY_DN1893_c0_g1/TRINITY_DN2448_c0_g1/TRINITY_DN9158_c3_g1/TRINITY_DN709_c0_g1                                                                                                                                                                                                                                                                                            | 6 |
| GO:0044458 | motile cilium assembly                            | 6/2626 | 12/33142 | 0.00015 | 0.001702 | 0.001274 | TRINITY_DN6657_c0_g1/TRINITY_DN6327_c1_g1/TRINITY_DN17079_c0_g1/TRINITY_                                                                                                                                                                                                                                                                                                                           | 6 |

|            |                                                 |         |           |          |          |          |                                                                                                                                                                                                                                                                                                                                                                               |    |
|------------|-------------------------------------------------|---------|-----------|----------|----------|----------|-------------------------------------------------------------------------------------------------------------------------------------------------------------------------------------------------------------------------------------------------------------------------------------------------------------------------------------------------------------------------------|----|
| GO:0071320 | cellular response to cAMP                       | 6/2626  | 12/33142  | 0.00015  | 0.001702 | 0.001274 | DN20881_c0_g2/TRINITY_DN5914_c0_g1/TRINITY_DN6343_1_c0_g1<br>TRINITY_DN16407_c1_g1/TRINITY_DN3713_c1_g1/TRINITY_DN11886_c0_g1/TRINITY_DN10344_c0_g1/TRINITY_DN7471_c0_g1/TRINITY_DN18471_c0_g2                                                                                                                                                                                | 6  |
| GO:0030285 | integral component of synaptic vesicle membrane | 9/2626  | 27/33142  | 0.000152 | 0.001729 | 0.001294 | TRINITY_DN4032_c0_g1/TRINITY_DN200_c0_g2/TRINITY_DN5859_c0_g1/TRINITY_DN27259_c0_g1/TRINITY_DN19635_c0_g1/TRINITY_DN7054_c0_g1/TRINITY_DN273_c1_g1/TRINITY_DN11061_c0_g2/TRINITY_DN4674_c0_g1<br>TRINITY_DN11463_c0_g1/TRINITY_DN72971_c0_g1/TRINITY_DN2516_c0_g1/TRINITY_DN12443_c0_g1/TRINITY_DN8493_c0_g1/TRINITY_DN17444_c0_g1/TRINITY_DN7641_c0_g1/TRINITY_DN7048_c0_g1/ | 9  |
| GO:0006869 | lipid transport                                 | 22/2626 | 119/33142 | 0.000154 | 0.001735 | 0.001299 | TRINITY_DN17444_c0_g2/TRINITY_DN5086_c0_g1/TRINITY_DN383_c0_g1/TRINITY_DN6767_c0_g1/TRINITY_DN17663_c0_g1/TRINITY_DN4826_c1_g1/TRINITY_DN2697_c1_g1/TRINITY_DN1998_c0_g1/TRINITY_DN7045_c1_g1/TRINITY_DN                                                                                                                                                                      | 22 |

|            |                                                              |         |          |          |          |          |                                                                                                                                                                                                                                                                                                                                                                                                                                                                                                                                                                                                                                                                                                                                                                            |    |
|------------|--------------------------------------------------------------|---------|----------|----------|----------|----------|----------------------------------------------------------------------------------------------------------------------------------------------------------------------------------------------------------------------------------------------------------------------------------------------------------------------------------------------------------------------------------------------------------------------------------------------------------------------------------------------------------------------------------------------------------------------------------------------------------------------------------------------------------------------------------------------------------------------------------------------------------------------------|----|
| GO:0031430 | M band                                                       | 10/2626 | 33/33142 | 0.000162 | 0.001826 | 0.001367 | Y_DN10060_c0_g1/TRINITY_DN39858_c0_g1/TRINITY_DN26496_c0_g1/TRINITY_DN4009_c0_g2/TRINITY_DN16662_c0_g1<br>TRINITY_DN725_c5_g1/TRINITY_DN1691_c0_g2/TRINITY_DN1908_c3_g1/TRINITY_DN13981_c0_g1/TRINITY_DN3732_c0_g1/TRINITY_DN5521_c0_g1/TRINITY_DN10569_c0_g2/TRINITY_DN471_c1_g1/TRINITY_DN39722_c0_g1/TRINITY_DN8235_c1_g1<br>TRINITY_DN1015_c0_g2/TRINITY_DN2378_c0_g1/TRINITY_DN1568_c0_g1/TRINITY_DN2675_c0_g1/TRINITY_DN8848_c0_g1/TRINITY_DN10757_c0_g1/TRINITY_DN42475_c0_g1/TRINITY_DN38748_c0_g1/TRINITY_DN9451_c0_g1/TRINITY_DN1979_c0_g2/TRINITY_DN1979_c0_g1/TRINITY_DN4543_c0_g2/TRINITY_DN3083_c0_g1/TRINITY_DN1979_c1_g1/TRINITY_DN18134_c0_g1/TRINITY_DN10356_c0_g1/TRINITY_DN31689_c0_g1/TRINITY_DN6282_c0_g1/TRINITY_DN9647_c0_g1/TRINITY_DN29956_c0_g1 | 10 |
| GO:0033993 | response to lipid                                            | 8/2626  | 22/33142 | 0.000179 | 0.002001 | 0.001498 |                                                                                                                                                                                                                                                                                                                                                                                                                                                                                                                                                                                                                                                                                                                                                                            | 8  |
| GO:0008569 | ATP-dependent microtubule motor activity, minus-end-directed | 12/2626 | 46/33142 | 0.000182 | 0.00203  | 0.00152  |                                                                                                                                                                                                                                                                                                                                                                                                                                                                                                                                                                                                                                                                                                                                                                            | 12 |

|            |                                                                   |         |           |          |          |          |                                                                                                                                                                                                                                                                                                         |    |
|------------|-------------------------------------------------------------------|---------|-----------|----------|----------|----------|---------------------------------------------------------------------------------------------------------------------------------------------------------------------------------------------------------------------------------------------------------------------------------------------------------|----|
| GO:0030855 | epithelial cell differentiation                                   | 7/2626  | 17/33142  | 0.000186 | 0.002055 | 0.001538 | TRINITY_DN5878_c0_g1/TRINITY_DN7743_c0_g1/TRINITY_DN8257_c0_g1/TRINITY_DN85_c0_g1/TRINITY_DN755_c1_g1/TRINITY_DN7476_c0_g1/TRINITY_DN111160_c0_g1/TRINITY_DN5032_c1_g1/TRINITY_DN1854_c0_g2/TRINITY_DN2835_c0_g1/TRINITY_DN7107_c0_g1/TRINITY_DN12176_c0_g1/TRINITY_DN10258_c0_g1/TRINITY_DN13730_c0_g1 | 7  |
| GO:0035338 | long-chain fatty-acyl-CoA biosynthetic process                    | 7/2626  | 17/33142  | 0.000186 | 0.002055 | 0.001538 | TRINITY_DN6327_c1_g1/TRINITY_DN3375_c0_g1/TRINITY_DN5006_c0_g2/TRINITY_DN21912_c0_g1/TRINITY_DN4002_c0_g3/TRINITY_DN11340_c0_g1/TRINITY_DN306_c1_g2/TRINITY_DN2153_c0_g1/TRINITY_DN13467_c0_g1/TRINITY_DN15988_c0_g2/TRINITY_DN4002_c0_g1                                                               | 7  |
| GO:0007224 | smoothened signaling pathway                                      | 11/2626 | 40/33142  | 0.000202 | 0.002229 | 0.001669 | TRINITY_DN2578_c0_g1/TRINITY_DN1893_c0_g1/TRINITY_DN10890_c0_g1/TRINITY_DN4336_c0_g2/TRINITY_DN8903_c0_g1/TRINITY_DN12504_c0_g1/TRINITY_DN14383_c0_g1/TRINITY_DN13176_c0_g1/TRINITY_DN3284_c0_g1/TRINITY_DN29267_c0_g2/TRINITY_DN15988_c0_g2/TRINITY_DN4002_c0_g1                                       | 11 |
| GO:0000977 | RNA polymerase II regulatory region sequence-specific DNA binding | 23/2626 | 130/33142 | 0.000217 | 0.002389 | 0.001788 | TRINITY_DN2578_c0_g1/TRINITY_DN1893_c0_g1/TRINITY_DN10890_c0_g1/TRINITY_DN4336_c0_g2/TRINITY_DN8903_c0_g1/TRINITY_DN12504_c0_g1/TRINITY_DN14383_c0_g1/TRINITY_DN13176_c0_g1/TRINITY_DN3284_c0_g1/TRINITY_DN29267_c0_g2/TRINITY_DN15988_c0_g2/TRINITY_DN4002_c0_g1                                       | 23 |

|            |                   |         |          |          |          |          |                                                                                                                                                                                                                                                                                                                                                                                                                                                                                                                                                                                                                                                                                                                                                                                    |    |
|------------|-------------------|---------|----------|----------|----------|----------|------------------------------------------------------------------------------------------------------------------------------------------------------------------------------------------------------------------------------------------------------------------------------------------------------------------------------------------------------------------------------------------------------------------------------------------------------------------------------------------------------------------------------------------------------------------------------------------------------------------------------------------------------------------------------------------------------------------------------------------------------------------------------------|----|
| GO:0002020 | protease binding  | 12/2626 | 47/33142 | 0.000227 | 0.002481 | 0.001858 | TY_DN49948_c0_g1/TRINITY_DN21038_c0_g2/TRINITY_DN2095_c0_g1/TRINITY_DN12413_c0_g1/TRINITY_DN13176_c0_g2/TRINITY_DN1111_c0_g1/TRINITY_DN40503_c0_g1/TRINITY_DN12512_c0_g1/TRINITY_DN4137_c2_g1/TRINITY_DN16221_c0_g1/TRINITY_DN9485_c0_g1/TRINITY_DN3093_c0_g1/TRINITY_DN674_c2_g1<br>TRINITY_DN72971_c0_g1/TRINITY_DN1691_c0_g2/TRINITY_DN5613_c1_g1/TRINITY_DN1557_c0_g1/TRINITY_DN1908_c3_g1/TRINITY_DN4826_c1_g1/TRINITY_DN56782_c0_g1/TRINITY_DN40503_c0_g1/TRINITY_DN4641_c0_g1/TRINITY_DN5031_c0_g1/TRINITY_DN43641_c0_g1/TRINITY_DN2961_c0_g1<br>TRINITY_DN5310_c0_g2/TRINITY_DN6305_c1_g1/TRINITY_DN6886_c3_g1/TRINITY_DN2738_c0_g1/TRINITY_DN1120_c0_g2/TRINITY_DN7712_c0_g1/TRINITY_DN8217_c0_g1/TRINITY_DN740_c0_g1/TRINITY_DN2598_c0_g2/TRINITY_DN18049_c0_g1/TRINITY_ | 12 |
| GO:0005604 | basement membrane | 13/2626 | 54/33142 | 0.000238 | 0.002569 | 0.001923 |                                                                                                                                                                                                                                                                                                                                                                                                                                                                                                                                                                                                                                                                                                                                                                                    | 13 |

|            |                               |         |          |          |          |          |                                                                                                                                                                                                                                                                                                                                                                                                                                                                                                                                                                                                                                                                                                                                                                  |    |
|------------|-------------------------------|---------|----------|----------|----------|----------|------------------------------------------------------------------------------------------------------------------------------------------------------------------------------------------------------------------------------------------------------------------------------------------------------------------------------------------------------------------------------------------------------------------------------------------------------------------------------------------------------------------------------------------------------------------------------------------------------------------------------------------------------------------------------------------------------------------------------------------------------------------|----|
| GO:0043087 | regulation of GTPase activity | 13/2626 | 54/33142 | 0.000238 | 0.002569 | 0.001923 | DN2868_c0_g1/TRINITY_DN35269_c0_g1/TRINITY_DN2281_c0_g1<br>TRINITY_DN2489_c0_g1/TRINITY_DN22690_c0_g1/TRINITY_DN2738_c0_g1/TRINITY_DN8297_c0_g1/TRINITY_DN740_c0_g1/TRINITY_DN4391_c0_g1/TRINITY_DN2087_c0_g1/TRINITY_DN2598_c0_g2/TRINITY_DN9935_c1_g1/TRINITY_DN24893_c0_g1/TRINITY_DN10956_c0_g1/TRINITY_DN2078_c0_g2/TRINITY_DN14663_c0_g1<br>TRINITY_DN788_c0_g2/TRINITY_DN9929_c0_g1/TRINITY_DN80619_c0_g2/TRINITY_DN6729_c0_g2/TRINITY_DN6729_c0_g3/TRINITY_DN3648_c0_g6/TRINITY_DN6010_c3_g1/TRINITY_DN996_c0_g1/TRINITY_DN5213_c0_g1/TRINITY_DN25933_c0_g2/TRINITY_DN3753_c0_g1/TRINITY_DN5625_c1_g1/TRINITY_DN23688_c0_g1<br>TRINITY_DN2244_c1_g1/TRINITY_DN36172_c0_g1/TRINITY_DN2786_c0_g1/TRINITY_DN31967_c0_g1/TRINITY_DN1614_c0_g1/TRINITY_DN1014 | 13 |
| GO:0070330 | aromatase activity            | 13/2626 | 54/33142 | 0.000238 | 0.002569 | 0.001923 | DN2868_c0_g1/TRINITY_DN35269_c0_g1/TRINITY_DN2281_c0_g1<br>TRINITY_DN2489_c0_g1/TRINITY_DN22690_c0_g1/TRINITY_DN2738_c0_g1/TRINITY_DN8297_c0_g1/TRINITY_DN740_c0_g1/TRINITY_DN4391_c0_g1/TRINITY_DN2087_c0_g1/TRINITY_DN2598_c0_g2/TRINITY_DN9935_c1_g1/TRINITY_DN24893_c0_g1/TRINITY_DN10956_c0_g1/TRINITY_DN2078_c0_g2/TRINITY_DN14663_c0_g1<br>TRINITY_DN788_c0_g2/TRINITY_DN9929_c0_g1/TRINITY_DN80619_c0_g2/TRINITY_DN6729_c0_g2/TRINITY_DN6729_c0_g3/TRINITY_DN3648_c0_g6/TRINITY_DN6010_c3_g1/TRINITY_DN996_c0_g1/TRINITY_DN5213_c0_g1/TRINITY_DN25933_c0_g2/TRINITY_DN3753_c0_g1/TRINITY_DN5625_c1_g1/TRINITY_DN23688_c0_g1<br>TRINITY_DN2244_c1_g1/TRINITY_DN36172_c0_g1/TRINITY_DN2786_c0_g1/TRINITY_DN31967_c0_g1/TRINITY_DN1614_c0_g1/TRINITY_DN1014 | 13 |
| GO:0005911 | cell-cell junction            | 14/2626 | 61/33142 | 0.000238 | 0.002569 | 0.001923 | DN2868_c0_g1/TRINITY_DN35269_c0_g1/TRINITY_DN2281_c0_g1<br>TRINITY_DN2489_c0_g1/TRINITY_DN22690_c0_g1/TRINITY_DN2738_c0_g1/TRINITY_DN8297_c0_g1/TRINITY_DN740_c0_g1/TRINITY_DN4391_c0_g1/TRINITY_DN2087_c0_g1/TRINITY_DN2598_c0_g2/TRINITY_DN9935_c1_g1/TRINITY_DN24893_c0_g1/TRINITY_DN10956_c0_g1/TRINITY_DN2078_c0_g2/TRINITY_DN14663_c0_g1<br>TRINITY_DN788_c0_g2/TRINITY_DN9929_c0_g1/TRINITY_DN80619_c0_g2/TRINITY_DN6729_c0_g2/TRINITY_DN6729_c0_g3/TRINITY_DN3648_c0_g6/TRINITY_DN6010_c3_g1/TRINITY_DN996_c0_g1/TRINITY_DN5213_c0_g1/TRINITY_DN25933_c0_g2/TRINITY_DN3753_c0_g1/TRINITY_DN5625_c1_g1/TRINITY_DN23688_c0_g1<br>TRINITY_DN2244_c1_g1/TRINITY_DN36172_c0_g1/TRINITY_DN2786_c0_g1/TRINITY_DN31967_c0_g1/TRINITY_DN1614_c0_g1/TRINITY_DN1014 | 14 |

|            |                                                         |         |          |          |          |          |                                                                                                                                                                                                                                                                                                                    |    |
|------------|---------------------------------------------------------|---------|----------|----------|----------|----------|--------------------------------------------------------------------------------------------------------------------------------------------------------------------------------------------------------------------------------------------------------------------------------------------------------------------|----|
| GO:0061098 | positive regulation of protein tyrosine kinase activity | 6/2626  | 13/33142 | 0.000259 | 0.002781 | 0.002082 | 5_c1_g1/TRINITY_DN43399_c0_g1/TRINITY_DN27045_c0_g1/TRINITY_DN2475_c0_g1/TRINITY_DN12127_c0_g1/TRINITY_DN446_c1_g1/TRINITY_DN11061_c0_g2/TRINITY_DN9850_c0_g1/TRINITY_DN7084_c0_g1<br>TRINITY_DN3991_c0_g1/TRINITY_DN2738_c0_g1/TRINITY_DN740_c0_g1/TRINITY_DN2598_c0_g2/TRINITY_DN2682_c0_g1/TRINITY_DN7471_c0_g1 | 6  |
| GO:0031624 | ubiquitin conjugating enzyme binding                    | 9/2626  | 29/33142 | 0.000282 | 0.003014 | 0.002256 | TRINITY_DN21399_c0_g2/TRINITY_DN8061_c0_g1/TRINITY_DN755_c1_g1/TRINITY_DN1765_c2_g1/TRINITY_DN3816_c0_g1/TRINITY_DN9041_c0_g1/TRINITY_DN7200_c0_g2/TRINITY_DN9041_c0_g2/TRINITY_DN11447_c0_g1                                                                                                                      | 9  |
| GO:0006171 | cAMP biosynthetic process                               | 7/2626  | 18/33142 | 0.000283 | 0.003014 | 0.002257 | TRINITY_DN17778_c0_g1/TRINITY_DN20653_c0_g1/TRINITY_DN20653_c0_g4/TRINITY_DN3665_c0_g1/TRINITY_DN6839_c2_g1/TRINITY_DN20653_c0_g2/TRINITY_DN26727_c0_g1                                                                                                                                                            | 7  |
| GO:0007568 | aging                                                   | 14/2626 | 62/33142 | 0.000286 | 0.003032 | 0.00227  | TRINITY_DN77781_c0_g1/TRINITY_DN60483_c1_g1/TRINITY_DN3007_c0_g1/TRINITY_                                                                                                                                                                                                                                          | 14 |

|            |                                     |         |           |          |          |         |                                                                                                                                                                                                                                                                                                                                                                                                                                                                                                                                                                                                                                                                                                                                                                                                                                                                                                                         |    |
|------------|-------------------------------------|---------|-----------|----------|----------|---------|-------------------------------------------------------------------------------------------------------------------------------------------------------------------------------------------------------------------------------------------------------------------------------------------------------------------------------------------------------------------------------------------------------------------------------------------------------------------------------------------------------------------------------------------------------------------------------------------------------------------------------------------------------------------------------------------------------------------------------------------------------------------------------------------------------------------------------------------------------------------------------------------------------------------------|----|
| GO:0030659 | cytoplasmic vesicle membrane        | 16/2626 | 77/33142  | 0.000301 | 0.003179 | 0.00238 | DN17663_c0_g1/TRINITY_DN<br>2779_c1_g2/TRINITY_DN1932<br>1_c0_g1/TRINITY_DN22381_c<br>0_g1/TRINITY_DN1797_c0_g1<br>/TRINITY_DN31435_c0_g1/TR<br>INITY_DN9175_c0_g1/TRINIT<br>Y_DN2779_c1_g3/TRINITY_D<br>N33241_c0_g1/TRINITY_DN6<br>985_c0_g1/TRINITY_DN12958<br>_c0_g1<br>TRINITY_DN473_c0_g1/TRIN<br>ITY_DN3899_c0_g1/TRINITY_<br>DN9564_c0_g1/TRINITY_DN6<br>222_c0_g1/TRINITY_DN3507_<br>c0_g1/TRINITY_DN16407_c1_<br>g1/TRINITY_DN1482_c0_g1/T<br>RINITY_DN3180_c0_g1/TRIN<br>ITY_DN8504_c0_g1/TRINITY_<br>DN11886_c0_g1/TRINITY_DN<br>7113_c0_g1/TRINITY_DN1482<br>_c0_g2/TRINITY_DN55372_c0<br>_g1/TRINITY_DN3255_c0_g2/<br>TRINITY_DN11447_c0_g1/TRI<br>NITY_DN5075_c0_g1<br>TRINITY_DN17778_c0_g1/TRI<br>NITY_DN11558_c1_g1/TRINI<br>TY_DN16186_c0_g1/TRINITY<br>_DN8167_c0_g1/TRINITY_DN<br>8805_c1_g1/TRINITY_DN2065<br>3_c0_g1/TRINITY_DN4789_c0<br>_g1/TRINITY_DN1229_c2_g1/<br>TRINITY_DN57132_c0_g2/TRI | 16 |
| GO:0046982 | protein heterodimerization activity | 42/2626 | 304/33142 | 0.000306 | 0.003219 | 0.00241 |                                                                                                                                                                                                                                                                                                                                                                                                                                                                                                                                                                                                                                                                                                                                                                                                                                                                                                                         | 42 |



|            |                   |         |           |          |          |         |                                                                                                                                                                                                                                                                                                                                                                                                                                                                                                                                                                                                                                                                                                                                                                                                                                                                                                                                                                                                                                                                                                                                                                                                                                                                  |    |
|------------|-------------------|---------|-----------|----------|----------|---------|------------------------------------------------------------------------------------------------------------------------------------------------------------------------------------------------------------------------------------------------------------------------------------------------------------------------------------------------------------------------------------------------------------------------------------------------------------------------------------------------------------------------------------------------------------------------------------------------------------------------------------------------------------------------------------------------------------------------------------------------------------------------------------------------------------------------------------------------------------------------------------------------------------------------------------------------------------------------------------------------------------------------------------------------------------------------------------------------------------------------------------------------------------------------------------------------------------------------------------------------------------------|----|
| GO:0007507 | heart development | 23/2626 | 133/33142 | 0.000307 | 0.003219 | 0.00241 | <p>NITY_DN3713_c1_g1/TRINIT<br/>         Y_DN17565_c0_g1/TRINITY_<br/>         DN49948_c0_g1/TRINITY_DN<br/>         13614_c1_g1/TRINITY_DN147<br/>         3_c2_g1/TRINITY_DN974_c0_<br/>         g1/TRINITY_DN13726_c0_g1/<br/>         TRINITY_DN9684_c1_g1/TRI<br/>         NITY_DN4620_c0_g1/TRINIT<br/>         Y_DN10757_c0_g1/TRINITY_<br/>         DN3722_c0_g1/TRINITY_DN8<br/>         4830_c0_g1/TRINITY_DN3743<br/>         _c0_g1/TRINITY_DN23750_c0<br/>         _g1/TRINITY_DN2654_c0_g1/<br/>         TRINITY_DN17694_c0_g1/TRI<br/>         NITY_DN2746_c0_g1/TRINIT<br/>         Y_DN2165_c3_g1/TRINITY_D<br/>         N29974_c0_g1/TRINITY_DN4<br/>         0503_c0_g1/TRINITY_DN6839<br/>         _c2_g1/TRINITY_DN13727_c0<br/>         _g1/TRINITY_DN14132_c0_g1<br/>         /TRINITY_DN3238_c0_g1/TRI<br/>         NITY_DN4137_c2_g1/TRINIT<br/>         Y_DN12650_c0_g1/TRINITY_<br/>         DN9107_c0_g1/TRINITY_DN8<br/>         29_c0_g3/TRINITY_DN13252_<br/>         c0_g1/TRINITY_DN9485_c0_g<br/>         1/TRINITY_DN6505_c0_g1/TR<br/>         INITY_DN6589_c0_g1/TRINIT<br/>         Y_DN38748_c0_g1<br/>         TRINITY_DN14379_c0_g1/TRI<br/>         NITY_DN1691_c0_g2/TRINIT<br/>         Y_DN22536_c0_g1/TRINITY_</p> | 23 |
|------------|-------------------|---------|-----------|----------|----------|---------|------------------------------------------------------------------------------------------------------------------------------------------------------------------------------------------------------------------------------------------------------------------------------------------------------------------------------------------------------------------------------------------------------------------------------------------------------------------------------------------------------------------------------------------------------------------------------------------------------------------------------------------------------------------------------------------------------------------------------------------------------------------------------------------------------------------------------------------------------------------------------------------------------------------------------------------------------------------------------------------------------------------------------------------------------------------------------------------------------------------------------------------------------------------------------------------------------------------------------------------------------------------|----|

GO:0030246

carbohydrate binding

28/2626

176/33142

0.000311

0.003252

0.002435

DN1557\_c0\_g1/TRINITY\_DN1  
908\_c3\_g1/TRINITY\_DN5216\_  
c1\_g1/TRINITY\_DN9451\_c0\_g  
1/TRINITY\_DN19269\_c0\_g1/T  
RINITY\_DN14383\_c0\_g1/TRI  
NITY\_DN3284\_c0\_g1/TRINIT  
Y\_DN85\_c0\_g1/TRINITY\_DN  
18134\_c0\_g1/TRINITY\_DN306  
\_c1\_g2/TRINITY\_DN35269\_c0  
\_g1/TRINITY\_DN13564\_c0\_g1  
/TRINITY\_DN2292\_c2\_g1/TRI  
NITY\_DN9158\_c3\_g1/TRINIT  
Y\_DN339\_c0\_g2/TRINITY\_D  
N11825\_c0\_g1/TRINITY\_DN7  
09\_c0\_g1/TRINITY\_DN489\_c1  
\_g1/TRINITY\_DN3299\_c0\_g1/  
TRINITY\_DN4381\_c0\_g1  
TRINITY\_DN737\_c0\_g1/TRIN  
ITY\_DN7148\_c1\_g1/TRINITY\_  
DN83267\_c0\_g1/TRINITY\_DN  
1686\_c0\_g1/TRINITY\_DN1533  
\_c0\_g2/TRINITY\_DN388\_c0\_g  
1/TRINITY\_DN34715\_c0\_g1/T  
RINITY\_DN56882\_c0\_g1/TRI  
NITY\_DN12607\_c0\_g1/TRINI  
TY\_DN683\_c0\_g1/TRINITY\_D  
N4210\_c0\_g1/TRINITY\_DN21  
17\_c0\_g2/TRINITY\_DN9492\_c  
0\_g1/TRINITY\_DN13138\_c0\_g  
1/TRINITY\_DN9492\_c0\_g2/TR  
INITY\_DN56756\_c0\_g1/TRINI  
TY\_DN5869\_c0\_g2/TRINITY\_

28

GO:0004190

aspartic-type endopeptidase activity

37/2626

258/33142

0.000328

0.003413

0.002555

DN13662\_c0\_g1/TRINITY\_DN  
8043\_c0\_g1/TRINITY\_DN2699  
3\_c0\_g1/TRINITY\_DN6892\_c0  
\_g1/TRINITY\_DN25356\_c0\_g1  
/TRINITY\_DN51228\_c1\_g1/TR  
INITY\_DN5431\_c0\_g1/TRINIT  
Y\_DN1598\_c1\_g1/TRINITY\_D  
N9937\_c0\_g1/TRINITY\_DN67  
57\_c0\_g1/TRINITY\_DN3178\_c  
0\_g1  
TRINITY\_DN3270\_c0\_g1/TRI  
NITY\_DN6070\_c0\_g1/TRINIT  
Y\_DN20392\_c0\_g1/TRINITY\_  
DN2636\_c0\_g2/TRINITY\_DN1  
830\_c0\_g2/TRINITY\_DN20442  
\_c0\_g1/TRINITY\_DN5348\_c0\_  
g2/TRINITY\_DN1557\_c0\_g1/T  
RINITY\_DN23043\_c0\_g3/TRI  
NITY\_DN1090\_c1\_g2/TRINIT  
Y\_DN1326\_c1\_g1/TRINITY\_D  
N8531\_c0\_g1/TRINITY\_DN29  
43\_c1\_g1/TRINITY\_DN9542\_c  
0\_g1/TRINITY\_DN12254\_c0\_g  
1/TRINITY\_DN1252\_c0\_g1/TR  
INITY\_DN24885\_c0\_g1/TRINI  
TY\_DN60975\_c0\_g1/TRINITY  
\_DN154919\_c0\_g1/TRINITY\_  
DN1085\_c0\_g1/TRINITY\_DN1  
874\_c0\_g1/TRINITY\_DN30295  
\_c0\_g1/TRINITY\_DN9090\_c0\_  
g2/TRINITY\_DN3766\_c0\_g1/T  
RINITY\_DN9861\_c0\_g1/TRIN

37

|            |                                           |         |          |          |          |          |                                                                                                                                                                                                                                                                                                                                                                                                                                                                                                                                                                                                                                                                                                                                                                                         |    |
|------------|-------------------------------------------|---------|----------|----------|----------|----------|-----------------------------------------------------------------------------------------------------------------------------------------------------------------------------------------------------------------------------------------------------------------------------------------------------------------------------------------------------------------------------------------------------------------------------------------------------------------------------------------------------------------------------------------------------------------------------------------------------------------------------------------------------------------------------------------------------------------------------------------------------------------------------------------|----|
| GO:0034765 | regulation of ion transmembrane transport | 14/2626 | 63/33142 | 0.000341 | 0.003537 | 0.002649 | ITY_DN30055_c0_g1/TRINITY_DN5009_c0_g2/TRINITY_DN57331_c0_g1/TRINITY_DN16018_c0_g1/TRINITY_DN12254_c0_g3/TRINITY_DN1618_c0_g1/TRINITY_DN1589_c5_g1/TRINITY_DN13245_c0_g1/TRINITY_DN3084_c0_g1/TRINITY_DN38702_c0_g1/TRINITY_DN9422_c0_g1/TRINITY_DN11438_c0_g1<br>TRINITY_DN1748_c0_g1/TRINITY_DN5216_c1_g1/TRINITY_DN10654_c0_g1/TRINITY_DN12107_c0_g1/TRINITY_DN16407_c1_g1/TRINITY_DN15120_c0_g1/TRINITY_DN16593_c0_g1/TRINITY_DN13726_c0_g1/TRINITY_DN14953_c0_g3/TRINITY_DN9551_c0_g3/TRINITY_DN17398_c0_g2/TRINITY_DN4779_c2_g1/TRINITY_DN2003_c0_g1/TRINITY_DN16754_c0_g1<br>TRINITY_DN3284_c0_g1/TRINITY_DN1216_c2_g1/TRINITY_DN23353_c2_g1/TRINITY_DN5370_c0_g1/TRINITY_DN520_c0_g1/TRINITY_DN346_c0_g1/TRINITY_DN339_c0_g2/TRINITY_DN3459_c0_g1/TRINITY_DN3241_c0_g1/TRINITY_ | 14 |
| GO:0008354 | germ cell migration                       | 11/2626 | 43/33142 | 0.000403 | 0.004169 | 0.003122 |                                                                                                                                                                                                                                                                                                                                                                                                                                                                                                                                                                                                                                                                                                                                                                                         | 11 |

|            |                                                                          |         |          |          |          |          |                                                                                                                                                                                                                                                                                                                                                                                                                                                                                                                                                                                                                                                                                                                                             |    |
|------------|--------------------------------------------------------------------------|---------|----------|----------|----------|----------|---------------------------------------------------------------------------------------------------------------------------------------------------------------------------------------------------------------------------------------------------------------------------------------------------------------------------------------------------------------------------------------------------------------------------------------------------------------------------------------------------------------------------------------------------------------------------------------------------------------------------------------------------------------------------------------------------------------------------------------------|----|
| GO:0004016 | adenylate cyclase activity                                               | 7/2626  | 19/33142 | 0.000417 | 0.00427  | 0.003197 | DN23609_c0_g1/TRINITY_DN12338_c0_g1<br>TRINITY_DN17778_c0_g1/TRINITY_DN20653_c0_g1/TRINITY_DN20653_c0_g4/TRINITY_DN3665_c0_g1/TRINITY_DN6839_c2_g1/TRINITY_DN20653_c0_g2/TRINITY_DN26727_c0_g1<br>TRINITY_DN3268_c0_g1/TRINITY_DN149_c1_g1/TRINITY_DN14068_c0_g2/TRINITY_DN14068_c0_g1/TRINITY_DN14068_c0_g3/TRINITY_DN9004_c0_g1/TRINITY_DN46_c0_g1<br>TRINITY_DN3991_c0_g1/TRINITY_DN32009_c0_g1/TRINITY_DN11954_c0_g1/TRINITY_DN2682_c0_g1/TRINITY_DN974_c0_g1/TRINITY_DN9853_c0_g1/TRINITY_DN15324_c1_g1<br>TRINITY_DN1893_c0_g1/TRINITY_DN5239_c1_g2/TRINITY_DN8167_c0_g1/TRINITY_DN2843_c0_g2/TRINITY_DN13176_c0_g1/TRINITY_DN29267_c0_g2/TRINITY_DN49948_c0_g1/TRINITY_DN2095_c0_g1/TRINITY_DN3722_c0_g1/TRINITY_DN13176_c0_g2/TRINI | 7  |
| GO:0015114 | phosphate ion transmembrane transporter activity                         | 7/2626  | 19/33142 | 0.000417 | 0.00427  | 0.003197 | TRINITY_DN14068_c0_g2/TRINITY_DN14068_c0_g1/TRINITY_DN14068_c0_g3/TRINITY_DN9004_c0_g1/TRINITY_DN46_c0_g1<br>TRINITY_DN3991_c0_g1/TRINITY_DN32009_c0_g1/TRINITY_DN11954_c0_g1/TRINITY_DN2682_c0_g1/TRINITY_DN974_c0_g1/TRINITY_DN9853_c0_g1/TRINITY_DN15324_c1_g1<br>TRINITY_DN1893_c0_g1/TRINITY_DN5239_c1_g2/TRINITY_DN8167_c0_g1/TRINITY_DN2843_c0_g2/TRINITY_DN13176_c0_g1/TRINITY_DN29267_c0_g2/TRINITY_DN49948_c0_g1/TRINITY_DN2095_c0_g1/TRINITY_DN3722_c0_g1/TRINITY_DN13176_c0_g2/TRINI                                                                                                                                                                                                                                            | 7  |
| GO:0031100 | animal organ regeneration                                                | 7/2626  | 19/33142 | 0.000417 | 0.00427  | 0.003197 | TRINITY_DN11954_c0_g1/TRINITY_DN2682_c0_g1/TRINITY_DN974_c0_g1/TRINITY_DN9853_c0_g1/TRINITY_DN15324_c1_g1<br>TRINITY_DN1893_c0_g1/TRINITY_DN5239_c1_g2/TRINITY_DN8167_c0_g1/TRINITY_DN2843_c0_g2/TRINITY_DN13176_c0_g1/TRINITY_DN29267_c0_g2/TRINITY_DN49948_c0_g1/TRINITY_DN2095_c0_g1/TRINITY_DN3722_c0_g1/TRINITY_DN13176_c0_g2/TRINI                                                                                                                                                                                                                                                                                                                                                                                                    | 7  |
| GO:0001227 | DNA-binding transcription repressor activity, RNA polymerase II-specific | 12/2626 | 50/33142 | 0.000422 | 0.004295 | 0.003216 | TRINITY_DN11954_c0_g1/TRINITY_DN2682_c0_g1/TRINITY_DN974_c0_g1/TRINITY_DN9853_c0_g1/TRINITY_DN15324_c1_g1<br>TRINITY_DN1893_c0_g1/TRINITY_DN5239_c1_g2/TRINITY_DN8167_c0_g1/TRINITY_DN2843_c0_g2/TRINITY_DN13176_c0_g1/TRINITY_DN29267_c0_g2/TRINITY_DN49948_c0_g1/TRINITY_DN2095_c0_g1/TRINITY_DN3722_c0_g1/TRINITY_DN13176_c0_g2/TRINI                                                                                                                                                                                                                                                                                                                                                                                                    | 12 |

|            |                                             |         |           |          |          |          |                                                                                                                                                                                                                                                                                                                                                                                                                                                                                                                                                                                                                                                                                                                                                                                                         |    |
|------------|---------------------------------------------|---------|-----------|----------|----------|----------|---------------------------------------------------------------------------------------------------------------------------------------------------------------------------------------------------------------------------------------------------------------------------------------------------------------------------------------------------------------------------------------------------------------------------------------------------------------------------------------------------------------------------------------------------------------------------------------------------------------------------------------------------------------------------------------------------------------------------------------------------------------------------------------------------------|----|
| GO:0007509 | mesoderm migration involved in gastrulation | 6/2626  | 14/33142  | 0.000423 | 0.004295 | 0.003216 | TY_DN5956_c0_g2/TRINITY_DN17100_c0_g1<br>TRINITY_DN39639_c3_g1/TRINITY_DN806_c0_g2/TRINITY_DN9642_c1_g2/TRINITY_DN339_c0_g2/TRINITY_DN806_c0_g1/TRINITY_DN864_c0_g3/TRINITY_DN3270_c0_g1/TRINITY_DN6070_c0_g1/TRINITY_DN20392_c0_g1/TRINITY_DN2636_c0_g2/TRINITY_DN1830_c0_g2/TRINITY_DN20442_c0_g1/TRINITY_DN459_c1_g1/TRINITY_DN5348_c0_g2/TRINITY_DN5356_c0_g1/TRINITY_DN1817_c1_g1/TRINITY_DN23043_c0_g3/TRINITY_DN1738_c0_g1/TRINITY_DN12282_c1_g1/TRINITY_DN1090_c1_g2/TRINITY_DN26151_c0_g2/TRINITY_DN1326_c1_g1/TRINITY_DN8531_c0_g1/TRINITY_DN21282_c0_g1/TRINITY_DN9542_c0_g1/TRINITY_DN12254_c0_g1/TRINITY_DN6054_c0_g1/TRINITY_DN1252_c0_g1/TRINITY_DN60975_c0_g1/TRINITY_DN154919_c0_g1/TRINITY_DN1874_c0_g1/TRINITY_DN30295_c0_g1/TRINITY_DN16389_c0_g1/TRINITY_DN9090_c0_g2/TRINITY_DN66 | 6  |
| GO:0015074 | DNA integration                             | 50/2626 | 387/33142 | 0.000442 | 0.004475 | 0.00335  |                                                                                                                                                                                                                                                                                                                                                                                                                                                                                                                                                                                                                                                                                                                                                                                                         | 50 |

|            |                           |         |          |          |         |          |                                                                                                                                                                                                                                                                                                                                                                                                                                                                                                                                                                                                                                                                                                                                                                                                  |    |
|------------|---------------------------|---------|----------|----------|---------|----------|--------------------------------------------------------------------------------------------------------------------------------------------------------------------------------------------------------------------------------------------------------------------------------------------------------------------------------------------------------------------------------------------------------------------------------------------------------------------------------------------------------------------------------------------------------------------------------------------------------------------------------------------------------------------------------------------------------------------------------------------------------------------------------------------------|----|
| GO:0007586 | digestion                 | 10/2626 | 37/33142 | 0.000456 | 0.00458 | 0.003429 | 443_c0_g1/TRINITY_DN3766_c0_g1/TRINITY_DN9861_c0_g1/TRINITY_DN30055_c0_g1/TRINITY_DN4190_c0_g1/TRINITY_DN716_c0_g1/TRINITY_DN23887_c0_g1/TRINITY_DN3333_c0_g1/TRINITY_DN57331_c0_g1/TRINITY_DN16018_c0_g1/TRINITY_DN12254_c0_g3/TRINITY_DN1618_c0_g1/TRINITY_DN1589_c5_g1/TRINITY_DN13245_c0_g1/TRINITY_DN13637_c0_g1/TRINITY_DN3084_c0_g1/TRINITY_DN38702_c0_g1/TRINITY_DN9422_c0_g1/TRINITY_DN88_c0_g2/TRINITY_DN11438_c0_g1/TRINITY_DN7448_c0_g1/TRINITY_DN31780_c0_g2/TRINITY_DN2384_c0_g1/TRINITY_DN11818_c0_g1/TRINITY_DN10126_c0_g1/TRINITY_DN2648_c0_g1/TRINITY_DN21814_c0_g2/TRINITY_DN309_c0_g1/TRINITY_DN4485_c0_g1/TRINITY_DN1773_c1_g2/TRINITY_DN5833_c0_g1/TRINITY_DN32069_c0_g1/TRINITY_DN33627_c0_g1/TRINITY_DN2751_c1_g2/TRINITY_DN2751_c1_g3/TRINITY_DN2751_c1_g1/TRINITY_DN54 | 10 |
| GO:0008202 | steroid metabolic process | 10/2626 | 37/33142 | 0.000456 | 0.00458 | 0.003429 |                                                                                                                                                                                                                                                                                                                                                                                                                                                                                                                                                                                                                                                                                                                                                                                                  | 10 |

|            |                       |         |           |          |          |          |                                                                                                                                                                                                                                                                                                                                                                                                                                                                                                                                                                                                                                                                                                                                                                                                              |    |
|------------|-----------------------|---------|-----------|----------|----------|----------|--------------------------------------------------------------------------------------------------------------------------------------------------------------------------------------------------------------------------------------------------------------------------------------------------------------------------------------------------------------------------------------------------------------------------------------------------------------------------------------------------------------------------------------------------------------------------------------------------------------------------------------------------------------------------------------------------------------------------------------------------------------------------------------------------------------|----|
| GO:0030018 | Z disc                | 16/2626 | 80/33142  | 0.000473 | 0.004723 | 0.003536 | 58_c0_g1/TRINITY_DN8091_c0_g1/TRINITY_DN10873_c0_g1/TRINITY_DN10583_c0_g1/TRINITY_DN9063_c0_g1/TRINITY_DN7730_c0_g4<br>TRINITY_DN1691_c0_g2/TRINITY_DN8299_c0_g1/TRINITY_DN1908_c3_g1/TRINITY_DN13981_c0_g1/TRINITY_DN2021_c1_g1/TRINITY_DN3732_c0_g1/TRINITY_DN5519_c0_g1/TRINITY_DN3180_c0_g1/TRINITY_DN4441_c3_g1/TRINITY_DN5521_c0_g1/TRINITY_DN10569_c0_g2/TRINITY_DN716_c0_g1/TRINITY_DN39722_c0_g1/TRINITY_DN15445_c0_g1/TRINITY_DN9055_c0_g2/TRINITY_DN8235_c1_g1<br>TRINITY_DN3270_c0_g1/TRINITY_DN6070_c0_g1/TRINITY_DN20392_c0_g1/TRINITY_DN2636_c0_g2/TRINITY_DN20442_c0_g1/TRINITY_DN38264_c0_g1/TRINITY_DN459_c1_g1/TRINITY_DN5348_c0_g2/TRINITY_DN3284_c2_g1/TRINITY_DN23043_c0_g3/TRINITY_DN9571_c0_g2/TRINITY_DN1090_c1_g2/TRINITY_DN1340_c0_g1/TRINITY_DN1326_c1_g1/TRINITY_DN8531_c0_g1/T | 16 |
| GO:0004519 | endonuclease activity | 46/2626 | 349/33142 | 0.000474 | 0.004723 | 0.003536 |                                                                                                                                                                                                                                                                                                                                                                                                                                                                                                                                                                                                                                                                                                                                                                                                              | 46 |



|            |                                                      |         |           |          |          |          |                                                                                                                                                                                                                                                                                                                                                                                                                                                                                                                                                                                                                                                                                                                                                                                                                       |    |
|------------|------------------------------------------------------|---------|-----------|----------|----------|----------|-----------------------------------------------------------------------------------------------------------------------------------------------------------------------------------------------------------------------------------------------------------------------------------------------------------------------------------------------------------------------------------------------------------------------------------------------------------------------------------------------------------------------------------------------------------------------------------------------------------------------------------------------------------------------------------------------------------------------------------------------------------------------------------------------------------------------|----|
| GO:0008284 | positive regulation of cell population proliferation | 23/2626 | 137/33142 | 0.000475 | 0.004723 | 0.003536 | <p>RINITY_DN5794_c0_g1/TRINITY_DN2943_c1_g1/TRINITY_DN14935_c1_g1/TRINITY_DN9542_c0_g1/TRINITY_DN12254_c0_g1/TRINITY_DN302_c0_g3/TRINITY_DN27747_c0_g1/TRINITY_DN154919_c0_g1/TRINITY_DN1874_c0_g1/TRINITY_DN30295_c0_g1/TRINITY_DN9090_c0_g2/TRINITY_DN3766_c0_g1/TRINITY_DN9861_c0_g1/TRINITY_DN5389_c0_g1/TRINITY_DN2240_c0_g1/TRINITY_DN30055_c0_g1/TRINITY_DN4190_c0_g1/TRINITY_DN10695_c0_g1/TRINITY_DN716_c0_g1/TRINITY_DN533_c4_g1/TRINITY_DN57331_c0_g1/TRINITY_DN30956_c0_g1/TRINITY_DN16018_c0_g1/TRINITY_DN1618_c0_g1/TRINITY_DN141_c0_g1/TRINITY_DN6581_c0_g1/TRINITY_DN9541_c0_g2/TRINITY_DN3084_c0_g1/TRINITY_DN38702_c0_g1/TRINITY_DN9422_c0_g1/TRINITY_DN11438_c0_g1/TRINITY_DN5239_c1_g2/TRINITY_DN9375_c0_g1/TRINITY_DN6108_c0_g1/TRINITY_DN7712_c0_g1/TRINITY_DN85_c0_g1/TRINITY_DN6348_c0_g1</p> | 23 |
|------------|------------------------------------------------------|---------|-----------|----------|----------|----------|-----------------------------------------------------------------------------------------------------------------------------------------------------------------------------------------------------------------------------------------------------------------------------------------------------------------------------------------------------------------------------------------------------------------------------------------------------------------------------------------------------------------------------------------------------------------------------------------------------------------------------------------------------------------------------------------------------------------------------------------------------------------------------------------------------------------------|----|

|            |                                                            |        |          |          |          |          |                                                                                                                                                                                                                                                                                                                                                                                                                                                                                                                                                          |   |
|------------|------------------------------------------------------------|--------|----------|----------|----------|----------|----------------------------------------------------------------------------------------------------------------------------------------------------------------------------------------------------------------------------------------------------------------------------------------------------------------------------------------------------------------------------------------------------------------------------------------------------------------------------------------------------------------------------------------------------------|---|
| GO:0007204 | positive regulation of cytosolic calcium ion concentration | 8/2626 | 25/33142 | 0.000487 | 0.004794 | 0.003589 | g1/TRINITY_DN17565_c0_g1/TRINITY_DN2327_c0_g1/TRINITY_DN15112_c0_g1/TRINITY_DN2352_c0_g2/TRINITY_DN6093_c0_g2/TRINITY_DN93_c0_g1/TRINITY_DN10426_c0_g1/TRINITY_DN40503_c0_g1/TRINITY_DN339_c0_g2/TRINITY_DN645_c0_g1/TRINITY_DN6985_c0_g1/TRINITY_DN10063_c0_g1/TRINITY_DN2321_c0_g1/TRINITY_DN1071_c0_g1/TRINITY_DN12889_c0_g1/TRINITY_DN23722_c0_g1/TRINITY_DN4416_c0_g1/TRINITY_DN17778_c0_g1/TRINITY_DN20653_c0_g1/TRINITY_DN22381_c0_g1/TRINITY_DN20653_c0_g4/TRINITY_DN31435_c0_g1/TRINITY_DN6839_c2_g1/TRINITY_DN6945_c0_g2/TRINITY_DN20653_c0_g2 | 8 |
| GO:0044297 | cell body                                                  | 8/2626 | 25/33142 | 0.000487 | 0.004794 | 0.003589 | TRINITY_DN954_c0_g1/TRINITY_DN18321_c0_g1/TRINITY_DN233_c0_g1/TRINITY_DN10760_c0_g1/TRINITY_DN5121_c0_g1/TRINITY_DN39318_c0_g1/TRINITY_DN2961_c0_g1/TRINITY_DN8692_c0_g1                                                                                                                                                                                                                                                                                                                                                                                 | 8 |
| GO:0097110 | scaffold protein binding                                   | 8/2626 | 25/33142 | 0.000487 | 0.004794 | 0.003589 | TRINITY_DN17778_c0_g1/TRINITY_DN20653_c0_g1/TRINI                                                                                                                                                                                                                                                                                                                                                                                                                                                                                                        | 8 |

|            |                                                |        |          |          |          |          |                                                                                                                                                                                                                                      |   |
|------------|------------------------------------------------|--------|----------|----------|----------|----------|--------------------------------------------------------------------------------------------------------------------------------------------------------------------------------------------------------------------------------------|---|
| GO:0008328 | ionotropic glutamate receptor complex          | 5/2626 | 10/33142 | 0.000558 | 0.005363 | 0.004015 | TY_DN16407_c1_g1/TRINITY_DN15308_c0_g2/TRINITY_DN6839_c2_g1/TRINITY_DN7687_c0_g1/TRINITY_DN7523_c0_g1/TRINITY_DN428_c0_g1/TRINITY_DN21399_c0_g2/TRINITY_DN9333_c0_g1/TRINITY_DN3816_c0_g1/TRINITY_DN15420_c0_g1/TRINITY_DN7200_c0_g2 | 5 |
| GO:0030240 | skeletal muscle thin filament assembly         | 5/2626 | 10/33142 | 0.000558 | 0.005363 | 0.004015 | TRINITY_DN1691_c0_g2/TRINITY_DN1908_c3_g1/TRINITY_DN2424_c0_g1/TRINITY_DN4325_c0_g1/TRINITY_DN982_c0_g1                                                                                                                              | 5 |
| GO:0032310 | prostaglandin secretion                        | 5/2626 | 10/33142 | 0.000558 | 0.005363 | 0.004015 | TRINITY_DN406_c0_g3/TRINITY_DN5049_c0_g1/TRINITY_DN2999_c0_g1/TRINITY_DN406_c0_g2/TRINITY_DN42565_c0_g1                                                                                                                              | 5 |
| GO:0034097 | response to cytokine                           | 5/2626 | 10/33142 | 0.000558 | 0.005363 | 0.004015 | TRINITY_DN10890_c0_g1/TRINITY_DN4861_c0_g1/TRINITY_DN7743_c0_g1/TRINITY_DN7326_c0_g1/TRINITY_DN6589_c0_g1                                                                                                                            | 5 |
| GO:0090102 | cochlea development                            | 5/2626 | 10/33142 | 0.000558 | 0.005363 | 0.004015 | TRINITY_DN72971_c0_g1/TRINITY_DN4826_c1_g1/TRINITY_DN306_c1_g2/TRINITY_DN43641_c0_g1/TRINITY_DN7318_c0_g1                                                                                                                            | 5 |
| GO:0090175 | regulation of establishment of planar polarity | 5/2626 | 10/33142 | 0.000558 | 0.005363 | 0.004015 | TRINITY_DN2244_c1_g1/TRINITY_DN43399_c0_g1/TRINI                                                                                                                                                                                     | 5 |

|            |                                                                  |         |          |          |          |          |                                                                                                                                                                                                                      |    |
|------------|------------------------------------------------------------------|---------|----------|----------|----------|----------|----------------------------------------------------------------------------------------------------------------------------------------------------------------------------------------------------------------------|----|
| GO:2000379 | positive regulation of reactive oxygen species metabolic process | 5/2626  | 10/33142 | 0.000558 | 0.005363 | 0.004015 | TY_DN27045_c0_g1/TRINITY_DN446_c1_g1/TRINITY_DN10063_c0_g1<br>TRINITY_DN3120_c0_g1/TRINITY_DN922_c0_g1/TRINITY_DN10426_c0_g1/TRINITY_DN56840_c0_g1/TRINITY_DN7471_c0_g1                                              | 5  |
| GO:0070593 | dendrite self-avoidance                                          | 10/2626 | 38/33142 | 0.000575 | 0.005504 | 0.004121 | TRINITY_DN2244_c1_g1/TRINITY_DN2868_c0_g2/TRINITY_DN6076_c0_g1/TRINITY_DN8217_c1_g1/TRINITY_DN43399_c0_g1/TRINITY_DN7898_c0_g1/TRINITY_DN27045_c0_g1/TRINITY_DN12452_c0_g1/TRINITY_DN446_c1_g1/TRINITY_DN13354_c0_g1 | 10 |
| GO:0006909 | phagocytosis                                                     | 7/2626  | 20/33142 | 0.000598 | 0.005669 | 0.004245 | TRINITY_DN47_c0_g1/TRINITY_DN542_c0_g2/TRINITY_DN15399_c0_g1/TRINITY_DN5086_c0_g1/TRINITY_DN13394_c0_g1/TRINITY_DN7045_c1_g1/TRINITY_DN16986_c0_g2                                                                   | 7  |
| GO:0042761 | very long-chain fatty acid biosynthetic process                  | 7/2626  | 20/33142 | 0.000598 | 0.005669 | 0.004245 | TRINITY_DN5032_c1_g1/TRINITY_DN1854_c0_g2/TRINITY_DN7107_c0_g1/TRINITY_DN12176_c0_g1/TRINITY_DN34926_c1_g1/TRINITY_DN10258_c0_g1/TRINITY_DN13730_c0_g1                                                               | 7  |
| GO:0080025 | phosphatidylinositol-3, 5-bisphosphate binding                   | 7/2626  | 20/33142 | 0.000598 | 0.005669 | 0.004245 | TRINITY_DN19161_c0_g1/TRINITY_DN12001_c0_g1/TRINI                                                                                                                                                                    | 7  |

|            |                 |         |          |          |          |          |                                                                                                                                                                                                                                                                                                                                                                                                                                                                                                                                                                                                                                                                                                                                                                              |    |
|------------|-----------------|---------|----------|----------|----------|----------|------------------------------------------------------------------------------------------------------------------------------------------------------------------------------------------------------------------------------------------------------------------------------------------------------------------------------------------------------------------------------------------------------------------------------------------------------------------------------------------------------------------------------------------------------------------------------------------------------------------------------------------------------------------------------------------------------------------------------------------------------------------------------|----|
| GO:0005770 | late endosome   | 15/2626 | 74/33142 | 0.000606 | 0.005717 | 0.00428  | TY_DN21883_c0_g1/TRINITY_DN13153_c0_g1/TRINITY_DN1812_c0_g1/TRINITY_DN75_c2_g1/TRINITY_DN6505_c0_g1<br>TRINITY_DN72971_c0_g1/TRINITY_DN8493_c0_g1/TRINITY_DN43642_c0_g1/TRINITY_DN11355_c0_g3/TRINITY_DN1568_c0_g1/TRINITY_DN2629_c0_g1/TRINITY_DN200_c0_g2/TRINITY_DN36153_c0_g3/TRINITY_DN4826_c1_g1/TRINITY_DN16407_c1_g1/TRINITY_DN1532_c0_g1/TRINITY_DN901_c0_g1/TRINITY_DN43641_c0_g1/TRINITY_DN7084_c0_g1/TRINITY_DN901_c0_g2/TRINITY_DN21399_c0_g2/TRINITY_DN1765_c2_g1/TRINITY_DN3816_c0_g1/TRINITY_DN9935_c1_g1/TRINITY_DN7687_c0_g1/TRINITY_DN15930_c0_g1/TRINITY_DN7200_c0_g2/TRINITY_DN6505_c0_g1/TRINITY_DN4674_c0_g1/TRINITY_DN4487_c3_g2/TRINITY_DN14134_c0_g1/TRINITY_DN18471_c0_g2/TRINITY_DN5239_c1_g2/TRINITY_DN9375_c0_g1/TRINITY_DN85_c0_g1/TRINITY_DN | 15 |
| GO:0098794 | postsynapse     | 12/2626 | 52/33142 | 0.000618 | 0.00582  | 0.004358 |                                                                                                                                                                                                                                                                                                                                                                                                                                                                                                                                                                                                                                                                                                                                                                              | 12 |
| GO:0035176 | social behavior | 8/2626  | 26/33142 | 0.000655 | 0.005932 | 0.004442 |                                                                                                                                                                                                                                                                                                                                                                                                                                                                                                                                                                                                                                                                                                                                                                              | 8  |

|            |                                         |        |          |          |          |          |                                                                                                                                                                                                                                                                                                                                                                                                                                                                                                                                                                                                                                                                                                                                                                                                             |   |
|------------|-----------------------------------------|--------|----------|----------|----------|----------|-------------------------------------------------------------------------------------------------------------------------------------------------------------------------------------------------------------------------------------------------------------------------------------------------------------------------------------------------------------------------------------------------------------------------------------------------------------------------------------------------------------------------------------------------------------------------------------------------------------------------------------------------------------------------------------------------------------------------------------------------------------------------------------------------------------|---|
| GO:0051384 | response to glucocorticoid              | 8/2626 | 26/33142 | 0.000655 | 0.005932 | 0.004442 | 15308_c0_g2/TRINITY_DN2095_c0_g1/TRINITY_DN15930_c0_g1/TRINITY_DN7523_c0_g1/TRINITY_DN428_c0_g1/TRINITY_DN1557_c0_g1/TRINITY_DN1568_c0_g1/TRINITY_DN4514_c0_g1/TRINITY_DN2675_c0_g1/TRINITY_DN1852_c2_g1/TRINITY_DN6037_c0_g1/TRINITY_DN6985_c0_g1/TRINITY_DN4895_c1_g1/TRINITY_DN5032_c1_g1/TRINITY_DN1854_c0_g2/TRINITY_DN2199_c2_g2/TRINITY_DN7107_c0_g1/TRINITY_DN12176_c0_g1/TRINITY_DN34926_c1_g1/TRINITY_DN10258_c0_g1/TRINITY_DN13730_c0_g1/TRINITY_DN5032_c1_g1/TRINITY_DN1854_c0_g2/TRINITY_DN2199_c2_g2/TRINITY_DN7107_c0_g1/TRINITY_DN12176_c0_g1/TRINITY_DN34926_c1_g1/TRINITY_DN10258_c0_g1/TRINITY_DN13730_c0_g1/TRINITY_DN5032_c1_g1/TRINITY_DN1854_c0_g2/TRINITY_DN2199_c2_g2/TRINITY_DN7107_c0_g1/TRINITY_DN12176_c0_g1/TRINITY_DN34926_c1_g1/TRINITY_DN10258_c0_g1/TRINITY_DN13730_c0_g1 | 8 |
| GO:0102336 | 3-oxo-arachidoyl-CoA synthase activity  | 8/2626 | 26/33142 | 0.000655 | 0.005932 | 0.004442 | N7107_c0_g1/TRINITY_DN12176_c0_g1/TRINITY_DN34926_c1_g1/TRINITY_DN10258_c0_g1/TRINITY_DN13730_c0_g1/TRINITY_DN5032_c1_g1/TRINITY_DN1854_c0_g2/TRINITY_DN2199_c2_g2/TRINITY_DN7107_c0_g1/TRINITY_DN12176_c0_g1/TRINITY_DN34926_c1_g1/TRINITY_DN10258_c0_g1/TRINITY_DN13730_c0_g1/TRINITY_DN5032_c1_g1/TRINITY_DN1854_c0_g2/TRINITY_DN2199_c2_g2/TRINITY_DN7107_c0_g1/TRINITY_DN12176_c0_g1/TRINITY_DN34926_c1_g1/TRINITY_DN10258_c0_g1/TRINITY_DN13730_c0_g1                                                                                                                                                                                                                                                                                                                                                 | 8 |
| GO:0102337 | 3-oxo-cerotoyl-CoA synthase activity    | 8/2626 | 26/33142 | 0.000655 | 0.005932 | 0.004442 | N7107_c0_g1/TRINITY_DN12176_c0_g1/TRINITY_DN34926_c1_g1/TRINITY_DN10258_c0_g1/TRINITY_DN13730_c0_g1/TRINITY_DN5032_c1_g1/TRINITY_DN1854_c0_g2/TRINITY_DN2199_c2_g2/TRINITY_DN7107_c0_g1/TRINITY_DN12176_c0_g1/TRINITY_DN34926_c1_g1/TRINITY_DN10258_c0_g1/TRINITY_DN13730_c0_g1                                                                                                                                                                                                                                                                                                                                                                                                                                                                                                                             | 8 |
| GO:0102338 | 3-oxo-lignoceroyl-CoA synthase activity | 8/2626 | 26/33142 | 0.000655 | 0.005932 | 0.004442 | N7107_c0_g1/TRINITY_DN12176_c0_g1/TRINITY_DN34926_c1_g1/TRINITY_DN10258_c0_g1/TRINITY_DN13730_c0_g1                                                                                                                                                                                                                                                                                                                                                                                                                                                                                                                                                                                                                                                                                                         | 8 |

|            |                                                  |        |          |          |          |          |                                                                                                                                                                                                                                                                                                                                                                                                                                                                                       |   |
|------------|--------------------------------------------------|--------|----------|----------|----------|----------|---------------------------------------------------------------------------------------------------------------------------------------------------------------------------------------------------------------------------------------------------------------------------------------------------------------------------------------------------------------------------------------------------------------------------------------------------------------------------------------|---|
| GO:0102756 | very-long-chain 3-ketoacyl-CoA synthase activity | 8/2626 | 26/33142 | 0.000655 | 0.005932 | 0.004442 | TRINITY_DN5032_c1_g1/TRINITY_DN1854_c0_g2/TRINITY_DN2199_c2_g2/TRINITY_DN7107_c0_g1/TRINITY_DN12176_c0_g1/TRINITY_DN34926_c1_g1/TRINITY_DN10258_c0_g1/TRINITY_DN13730_c0_g1/TRINITY_DN11509_c0_g1/TRINITY_DN6327_c1_g1/TRINITY_DN19269_c0_g1/TRINITY_DN4002_c0_g3/TRINITY_DN11340_c0_g1/TRINITY_DN306_c1_g2/TRINITY_DN9168_c0_g2/TRINITY_DN4002_c0_g1/TRINITY_DN1568_c0_g1/TRINITY_DN7048_c0_g1/TRINITY_DN5086_c0_g1/TRINITY_DN5278_c0_g1/TRINITY_DN10757_c0_g1/TRINITY_DN38748_c0_g1 | 8 |
| GO:1905515 | non-motile cilium assembly                       | 8/2626 | 26/33142 | 0.000655 | 0.005932 | 0.004442 | TRINITY_DN725_c5_g1/TRINITY_DN1691_c0_g2/TRINITY_DN1908_c3_g1/TRINITY_DN13981_c0_g1/TRINITY_DN5519_c0_g1/TRINITY_DN471_c1_g1                                                                                                                                                                                                                                                                                                                                                          | 8 |
| GO:0030301 | cholesterol transport                            | 6/2626 | 15/33142 | 0.000658 | 0.005932 | 0.004442 | TRINITY_DN9358_c0_g1/TRINITY_DN6174_c0_g1/TRINITY_DN47_c0_g1/TRINITY_DN7712_c0_g1/TRINITY_DN85_c0_g1/TRINITY_DN7759_c0_g1                                                                                                                                                                                                                                                                                                                                                             | 6 |
| GO:0031674 | I band                                           | 6/2626 | 15/33142 | 0.000658 | 0.005932 | 0.004442 |                                                                                                                                                                                                                                                                                                                                                                                                                                                                                       | 6 |
| GO:0042472 | inner ear morphogenesis                          | 6/2626 | 15/33142 | 0.000658 | 0.005932 | 0.004442 |                                                                                                                                                                                                                                                                                                                                                                                                                                                                                       | 6 |

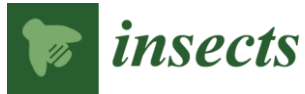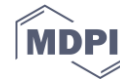

|            |                                                             |         |          |          |          |          |                                                                                                                                                                                                                                                           |    |
|------------|-------------------------------------------------------------|---------|----------|----------|----------|----------|-----------------------------------------------------------------------------------------------------------------------------------------------------------------------------------------------------------------------------------------------------------|----|
| GO:0043014 | alpha-tubulin binding                                       | 6/2626  | 15/33142 | 0.000658 | 0.005932 | 0.004442 | TRINITY_DN18454_c0_g1/TRINITY_DN954_c0_g1/TRINITY_DN233_c0_g1/TRINITY_DN7131_c0_g1/TRINITY_DN2372_c0_g1/TRINITY_DN953_c0_g1/TRINITY_DN9375_c0_g1/TRINITY_DN2557_c0_g2/TRINITY_DN9333_c0_g1/TRINITY_DN15420_c0_g1/TRINITY_DN7687_c0_g1/TRINITY_DN428_c0_g1 | 6  |
| GO:0051968 | positive regulation of synaptic transmission, glutamatergic | 6/2626  | 15/33142 | 0.000658 | 0.005932 | 0.004442 | TRINITY_DN7371_c0_g1/TRINITY_DN36172_c0_g1/TRINITY_DN12886_c0_g1/TRINITY_DN306_c1_g2/TRINITY_DN9168_c0_g2/TRINITY_DN2869_c2_g1                                                                                                                            | 6  |
| GO:1902017 | regulation of cilium assembly                               | 6/2626  | 15/33142 | 0.000658 | 0.005932 | 0.004442 | TRINITY_DN7740_c0_g1/TRINITY_DN35198_c0_g1/TRINITY_DN18321_c0_g1/TRINITY_DN722_c1_g1/TRINITY_DN4002_c0_g3/TRINITY_DN5483_c0_g1/TRINITY_DN9633_c0_g1/TRINITY_DN6230_c4_g1/TRINITY_DN4002_c0_g1/TRINITY_DN59259_c0_g1                                       | 6  |
| GO:0045880 | positive regulation of smoothened signaling pathway         | 10/2626 | 39/33142 | 0.000719 | 0.006465 | 0.004841 | TRINITY_DN83616_c0_g1/TRINITY_DN34526_c0_g1/TRINITY_DN10273_c0_g1/TRINITY_DN10142_c0_g3/TRINITY_DN11012_c0_g1/TRINITY_DN26479_c0_g1/TRINITY_DN9973                                                                                                        | 10 |
| GO:0005549 | odorant binding                                             | 12/2626 | 53/33142 | 0.000743 | 0.006634 | 0.004967 |                                                                                                                                                                                                                                                           | 12 |



|            |                                                                                       |         |           |          |          |          |                                                                                                                                                                                                                                                                                                                                                                                                                                                                                                                                                                                                                                                                                                                                                                         |    |
|------------|---------------------------------------------------------------------------------------|---------|-----------|----------|----------|----------|-------------------------------------------------------------------------------------------------------------------------------------------------------------------------------------------------------------------------------------------------------------------------------------------------------------------------------------------------------------------------------------------------------------------------------------------------------------------------------------------------------------------------------------------------------------------------------------------------------------------------------------------------------------------------------------------------------------------------------------------------------------------------|----|
| GO:0007626 | locomotory behavior                                                                   | 12/2626 | 53/33142  | 0.000743 | 0.006634 | 0.004967 | _c0_g1/TRINITY_DN27088_c0_g3/TRINITY_DN64506_c0_g1/TRINITY_DN13749_c0_g1/TRINITY_DN24670_c0_g1/TRINITY_DN16300_c0_g1/TRINITY_DN17778_c0_g1/TRINITY_DN6174_c0_g1/TRINITY_DN20653_c0_g1/TRINITY_DN1580_c0_g1/TRINITY_DN7759_c0_g1/TRINITY_DN22381_c0_g1/TRINITY_DN1267_c0_g2/TRINITY_DN8217_c1_g1/TRINITY_DN31435_c0_g1/TRINITY_DN8346_c1_g1/TRINITY_DN18131_c0_g1/TRINITY_DN6839_c2_g1/TRINITY_DN6597_c0_g1/TRINITY_DN1570_c0_g1/TRINITY_DN8167_c0_g1/TRINITY_DN10654_c0_g1/TRINITY_DN28241_c0_g1/TRINITY_DN35025_c0_g1/TRINITY_DN4522_c0_g1/TRINITY_DN2997_c0_g1/TRINITY_DN8066_c0_g1/TRINITY_DN19075_c0_g1/TRINITY_DN11631_c0_g3/TRINITY_DN1929_c1_g1/TRINITY_DN84_c2_g1/TRINITY_DN7625_c0_g1/TRINITY_DN1636_c0_g1/TRINITY_DN10137_c0_g1/TRINITY_DN3305_c0_g1/TRINITY_ | 12 |
| GO:0005261 | cation channel activity                                                               | 7/2626  | 21/33142  | 0.000837 | 0.00745  | 0.005578 |                                                                                                                                                                                                                                                                                                                                                                                                                                                                                                                                                                                                                                                                                                                                                                         | 7  |
| GO:0016616 | oxidoreductase activity, acting on the CH-OH group of donors, NAD or NADP as acceptor | 22/2626 | 134/33142 | 0.000849 | 0.007537 | 0.005643 |                                                                                                                                                                                                                                                                                                                                                                                                                                                                                                                                                                                                                                                                                                                                                                         | 22 |

|            |                                                      |         |           |          |          |          |                                                                                                                                                                                                                                                                                                                                                                                                                                                                                                                                                                                                                                                                                                                                                                                                 |    |
|------------|------------------------------------------------------|---------|-----------|----------|----------|----------|-------------------------------------------------------------------------------------------------------------------------------------------------------------------------------------------------------------------------------------------------------------------------------------------------------------------------------------------------------------------------------------------------------------------------------------------------------------------------------------------------------------------------------------------------------------------------------------------------------------------------------------------------------------------------------------------------------------------------------------------------------------------------------------------------|----|
| GO:0008285 | negative regulation of cell population proliferation | 20/2626 | 117/33142 | 0.000854 | 0.007555 | 0.005657 | DN8561_c0_g2/TRINITY_DN2398_c0_g2/TRINITY_DN17415_c0_g1/TRINITY_DN1610_c0_g1/TRINITY_DN6810_c0_g1/TRINITY_DN7264_c0_g1/TRINITY_DN11473_c0_g1/TRINITY_DN3559_c0_g1/TRINITY_DN37668_c0_g1/TRINITY_DN7072_c1_g2/TRINITY_DN692_c2_g1/TRINITY_DN6300_c0_g1/TRINITY_DN219_c3_g1/TRINITY_DN1990_c0_g1/TRINITY_DN6886_c3_g1/TRINITY_DN5781_c0_g1/TRINITY_DN12891_c0_g1/TRINITY_DN1178_c2_g1/TRINITY_DN10145_c1_g1/TRINITY_DN11156_c0_g5/TRINITY_DN93_c0_g1/TRINITY_DN22905_c0_g1/TRINITY_DN9158_c3_g1/TRINITY_DN4000_c0_g1/TRINITY_DN709_c0_g1/TRINITY_DN2011_c0_g1/TRINITY_DN12650_c0_g1/TRINITY_DN12338_c0_g1/TRINITY_DN7084_c0_g1/TRINITY_DN3545_c0_g1/TRINITY_DN2285_c0_g1/TRINITY_DN7471_c0_g1<br>TRINITY_DN7384_c0_g1/TRINITY_DN4836_c0_g1/TRINITY_DN7756_c0_g1/TRINITY_DN42262_c0_g1/TRINITY_DN1 | 20 |
| GO:0004602 | glutathione peroxidase activity                      | 8/2626  | 27/33142  | 0.000867 | 0.007625 | 0.005709 |                                                                                                                                                                                                                                                                                                                                                                                                                                                                                                                                                                                                                                                                                                                                                                                                 | 8  |

|            |                                        |         |           |          |          |          |                                                                                                                                                                                                                                                                                                                                                                                                                                                                                                                                                                                                                                                                                                                                                                                                      |    |
|------------|----------------------------------------|---------|-----------|----------|----------|----------|------------------------------------------------------------------------------------------------------------------------------------------------------------------------------------------------------------------------------------------------------------------------------------------------------------------------------------------------------------------------------------------------------------------------------------------------------------------------------------------------------------------------------------------------------------------------------------------------------------------------------------------------------------------------------------------------------------------------------------------------------------------------------------------------------|----|
| GO:0035002 | liquid clearance, open tracheal system | 8/2626  | 27/33142  | 0.000867 | 0.007625 | 0.005709 | 3964_c0_g1/TRINITY_DN1118_c0_g1/TRINITY_DN13697_c0_g1/TRINITY_DN8671_c0_g1/TRINITY_DN11631_c0_g3/TRINITY_DN10841_c0_g1/TRINITY_DN3305_c0_g1/TRINITY_DN6810_c0_g1/TRINITY_DN10545_c1_g1/TRINITY_DN19234_c0_g1/TRINITY_DN3178_c0_g1/TRINITY_DN18007_c0_g1/TRINITY_DN6455_c0_g1/TRINITY_DN77269_c0_g1/TRINITY_DN5164_c0_g3/TRINITY_DN1568_c0_g1/TRINITY_DN21814_c0_g2/TRINITY_DN2675_c0_g1/TRINITY_DN23263_c0_g1/TRINITY_DN4485_c0_g1/TRINITY_DN4211_c1_g3/TRINITY_DN5833_c0_g1/TRINITY_DN4537_c0_g1/TRINITY_DN3989_c1_g1/TRINITY_DN6661_c0_g1/TRINITY_DN4992_c0_g1/TRINITY_DN3778_c2_g1/TRINITY_DN7384_c0_g1/TRINITY_DN59294_c0_g1/TRINITY_DN15486_c0_g2/TRINITY_DN17581_c0_g1/TRINITY_DN51872_c0_g1/TRINITY_DN52390_c0_g1/TRINITY_DN3655_c4_g1/TRINITY_DN5690_c0_g1/TRINITY_DN42262_c0_g1/TRINITY_DN1 | 8  |
| GO:0016298 | lipase activity                        | 12/2626 | 54/33142  | 0.000887 | 0.007774 | 0.005821 |                                                                                                                                                                                                                                                                                                                                                                                                                                                                                                                                                                                                                                                                                                                                                                                                      | 12 |
| GO:0005743 | mitochondrial inner membrane           | 51/2626 | 410/33142 | 0.000931 | 0.008136 | 0.006092 |                                                                                                                                                                                                                                                                                                                                                                                                                                                                                                                                                                                                                                                                                                                                                                                                      | 51 |



4803\_c0\_g1/TRINITY\_DN1283  
5\_c0\_g1/TRINITY\_DN4818\_c0  
\_g1/TRINITY\_DN7737\_c0\_g1/  
TRINITY\_DN3983\_c0\_g1/TRI  
NITY\_DN365\_c5\_g1/TRINITY  
\_DN10159\_c1\_g1/TRINITY\_D  
N7813\_c0\_g1/TRINITY\_DN51  
99\_c0\_g1/TRINITY\_DN2899\_c  
0\_g1/TRINITY\_DN10873\_c0\_g  
1/TRINITY\_DN12540\_c0\_g1/T  
RINITY\_DN8476\_c0\_g2/TRIN  
ITY\_DN96301\_c0\_g1/TRINITY  
\_DN21082\_c0\_g1/TRINITY\_D  
N9845\_c0\_g2/TRINITY\_DN38  
01\_c0\_g1/TRINITY\_DN6638\_c  
2\_g1/TRINITY\_DN7958\_c0\_g1  
/TRINITY\_DN20844\_c0\_g1/TR  
INITY\_DN4859\_c0\_g1/TRINIT  
Y\_DN20346\_c0\_g1/TRINITY\_  
DN49166\_c0\_g1/TRINITY\_DN  
1118\_c0\_g1/TRINITY\_DN1188  
6\_c0\_g1/TRINITY\_DN15536\_c  
0\_g1/TRINITY\_DN31840\_c0\_g  
1/TRINITY\_DN6690\_c1\_g1/TR  
INITY\_DN7252\_c0\_g2/TRINIT  
Y\_DN16317\_c0\_g1/TRINITY\_  
DN6254\_c0\_g1/TRINITY\_DN4  
978\_c0\_g1/TRINITY\_DN6225\_  
c0\_g1/TRINITY\_DN1436\_c1\_g  
1/TRINITY\_DN8291\_c0\_g1/TR  
INITY\_DN7875\_c0\_g1/TRINIT  
Y\_DN10344\_c0\_g1/TRINITY\_



|            |                                                    |        |          |          |          |         |                                                                                                                                                                                                                                                                                                                                                                                                                                                                                                                                                                                                                                                                                                                         |   |
|------------|----------------------------------------------------|--------|----------|----------|----------|---------|-------------------------------------------------------------------------------------------------------------------------------------------------------------------------------------------------------------------------------------------------------------------------------------------------------------------------------------------------------------------------------------------------------------------------------------------------------------------------------------------------------------------------------------------------------------------------------------------------------------------------------------------------------------------------------------------------------------------------|---|
| GO:0017016 | Ras GTPase binding                                 | 5/2626 | 11/33142 | 0.000957 | 0.008187 | 0.00613 | DN7264_c0_g3/TRINITY_DN940_c0_g1<br>TRINITY_DN22690_c0_g1/TRINITY_DN8297_c0_g1/TRINITY_DN3024_c0_g1/TRINITY_DN24893_c0_g1/TRINITY_DN12127_c0_g1<br>TRINITY_DN1568_c0_g1/TRINITY_DN5364_c0_g1/TRINITY_DN5086_c0_g1/TRINITY_DN333_c0_g1/TRINITY_DN8292_c0_g1<br>TRINITY_DN10890_c0_g1/TRINITY_DN12136_c0_g2/TRINITY_DN10159_c1_g1/TRINITY_DN3717_c0_g1/TRINITY_DN22425_c0_g1<br>TRINITY_DN10654_c0_g1/TRINITY_DN17398_c0_g2/TRINITY_DN8644_c0_g1/TRINITY_DN2003_c0_g1/TRINITY_DN18471_c0_g2<br>TRINITY_DN19269_c0_g1/TRINITY_DN9930_c0_g2/TRINITY_DN11340_c0_g1/TRINITY_DN12886_c0_g1/TRINITY_DN9168_c0_g2<br>TRINITY_DN12886_c0_g1/TRINITY_DN15113_c0_g1/TRINITY_DN2372_c0_g1/TRINITY_DN5968_c0_g1/TRINITY_DN14798_c0_g1 | 5 |
| GO:0034383 | low-density lipoprotein particle clearance         | 5/2626 | 11/33142 | 0.000957 | 0.008187 | 0.00613 | TRINITY_DN10890_c0_g1/TRINITY_DN12136_c0_g2/TRINITY_DN10159_c1_g1/TRINITY_DN3717_c0_g1/TRINITY_DN22425_c0_g1<br>TRINITY_DN10654_c0_g1/TRINITY_DN17398_c0_g2/TRINITY_DN8644_c0_g1/TRINITY_DN2003_c0_g1/TRINITY_DN18471_c0_g2<br>TRINITY_DN19269_c0_g1/TRINITY_DN9930_c0_g2/TRINITY_DN11340_c0_g1/TRINITY_DN12886_c0_g1/TRINITY_DN9168_c0_g2<br>TRINITY_DN12886_c0_g1/TRINITY_DN15113_c0_g1/TRINITY_DN2372_c0_g1/TRINITY_DN5968_c0_g1/TRINITY_DN14798_c0_g1                                                                                                                                                                                                                                                               | 5 |
| GO:0035006 | melanization defense response                      | 5/2626 | 11/33142 | 0.000957 | 0.008187 | 0.00613 | TRINITY_DN10890_c0_g1/TRINITY_DN12136_c0_g2/TRINITY_DN10159_c1_g1/TRINITY_DN3717_c0_g1/TRINITY_DN22425_c0_g1<br>TRINITY_DN10654_c0_g1/TRINITY_DN17398_c0_g2/TRINITY_DN8644_c0_g1/TRINITY_DN2003_c0_g1/TRINITY_DN18471_c0_g2<br>TRINITY_DN19269_c0_g1/TRINITY_DN9930_c0_g2/TRINITY_DN11340_c0_g1/TRINITY_DN12886_c0_g1/TRINITY_DN9168_c0_g2<br>TRINITY_DN12886_c0_g1/TRINITY_DN15113_c0_g1/TRINITY_DN2372_c0_g1/TRINITY_DN5968_c0_g1/TRINITY_DN14798_c0_g1                                                                                                                                                                                                                                                               | 5 |
| GO:0035725 | sodium ion transmembrane transport                 | 5/2626 | 11/33142 | 0.000957 | 0.008187 | 0.00613 | TRINITY_DN10890_c0_g1/TRINITY_DN12136_c0_g2/TRINITY_DN10159_c1_g1/TRINITY_DN3717_c0_g1/TRINITY_DN22425_c0_g1<br>TRINITY_DN10654_c0_g1/TRINITY_DN17398_c0_g2/TRINITY_DN8644_c0_g1/TRINITY_DN2003_c0_g1/TRINITY_DN18471_c0_g2<br>TRINITY_DN19269_c0_g1/TRINITY_DN9930_c0_g2/TRINITY_DN11340_c0_g1/TRINITY_DN12886_c0_g1/TRINITY_DN9168_c0_g2<br>TRINITY_DN12886_c0_g1/TRINITY_DN15113_c0_g1/TRINITY_DN2372_c0_g1/TRINITY_DN5968_c0_g1/TRINITY_DN14798_c0_g1                                                                                                                                                                                                                                                               | 5 |
| GO:0035735 | intraciliary transport involved in cilium assembly | 5/2626 | 11/33142 | 0.000957 | 0.008187 | 0.00613 | TRINITY_DN10890_c0_g1/TRINITY_DN12136_c0_g2/TRINITY_DN10159_c1_g1/TRINITY_DN3717_c0_g1/TRINITY_DN22425_c0_g1<br>TRINITY_DN10654_c0_g1/TRINITY_DN17398_c0_g2/TRINITY_DN8644_c0_g1/TRINITY_DN2003_c0_g1/TRINITY_DN18471_c0_g2<br>TRINITY_DN19269_c0_g1/TRINITY_DN9930_c0_g2/TRINITY_DN11340_c0_g1/TRINITY_DN12886_c0_g1/TRINITY_DN9168_c0_g2<br>TRINITY_DN12886_c0_g1/TRINITY_DN15113_c0_g1/TRINITY_DN2372_c0_g1/TRINITY_DN5968_c0_g1/TRINITY_DN14798_c0_g1                                                                                                                                                                                                                                                               | 5 |
| GO:0045504 | dynein heavy chain binding                         | 5/2626 | 11/33142 | 0.000957 | 0.008187 | 0.00613 | TRINITY_DN10890_c0_g1/TRINITY_DN12136_c0_g2/TRINITY_DN10159_c1_g1/TRINITY_DN3717_c0_g1/TRINITY_DN22425_c0_g1<br>TRINITY_DN10654_c0_g1/TRINITY_DN17398_c0_g2/TRINITY_DN8644_c0_g1/TRINITY_DN2003_c0_g1/TRINITY_DN18471_c0_g2<br>TRINITY_DN19269_c0_g1/TRINITY_DN9930_c0_g2/TRINITY_DN11340_c0_g1/TRINITY_DN12886_c0_g1/TRINITY_DN9168_c0_g2<br>TRINITY_DN12886_c0_g1/TRINITY_DN15113_c0_g1/TRINITY_DN2372_c0_g1/TRINITY_DN5968_c0_g1/TRINITY_DN14798_c0_g1                                                                                                                                                                                                                                                               | 5 |

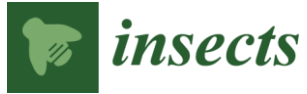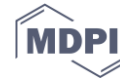

|            |                                              |        |          |          |          |          |                                                                                                                                |   |
|------------|----------------------------------------------|--------|----------|----------|----------|----------|--------------------------------------------------------------------------------------------------------------------------------|---|
| GO:0050729 | positive regulation of inflammatory response | 5/2626 | 11/33142 | 0.000957 | 0.008187 | 0.00613  | TRINITY_DN3991_c0_g1/TRINITY_DN6931_c0_g1/TRINITY_DN2682_c0_g1/TRINITY_DN56782_c0_g1/TRINITY_DN10344_c0_g1                     | 5 |
| GO:0005796 | Golgi lumen                                  | 6/2626 | 16/33142 | 0.000982 | 0.008301 | 0.006215 | TRINITY_DN2738_c0_g1/TRINITY_DN12529_c0_g1/TRINITY_DN740_c0_g1/TRINITY_DN1902_c0_g1/TRINITY_DN2598_c0_g2/TRINITY_DN9853_c0_g1  | 6 |
| GO:0007369 | gastrulation                                 | 6/2626 | 16/33142 | 0.000982 | 0.008301 | 0.006215 | TRINITY_DN15240_c0_g1/TRINITY_DN39639_c3_g1/TRINITY_DN15411_c0_g1/TRINITY_DN9642_c1_g2/TRINITY_DN645_c0_g1/TRINITY_DN864_c0_g3 | 6 |
| GO:0071260 | cellular response to mechanical stimulus     | 6/2626 | 16/33142 | 0.000982 | 0.008301 | 0.006215 | TRINITY_DN8167_c0_g1/TRINITY_DN7743_c0_g1/TRINITY_DN1797_c0_g1/TRINITY_DN3238_c0_g1/TRINITY_DN10344_c0_g1/TRINITY_DN4895_c1_g1 | 6 |
| GO:0097546 | ciliary base                                 | 6/2626 | 16/33142 | 0.000982 | 0.008301 | 0.006215 | TRINITY_DN5006_c0_g2/TRINITY_DN11340_c0_g1/TRINITY_DN13406_c0_g1/TRINITY_DN5875_c0_g1/TRINITY_DN306_c1_g2/TRINITY_DN9168_c0_g2 | 6 |
| GO:0030308 | negative regulation of cell growth           | 9/2626 | 34/33142 | 0.001028 | 0.008613 | 0.006449 | TRINITY_DN14358_c0_g1/TRINITY_DN1487_c0_g2/TRINITY_DN4329_c1_g1/TRINITY_D                                                      | 9 |

|            |                                         |         |          |          |          |          |                                                                                                                                                                                                                                                                                                                                                                                                                                                                                                                                                                                                                                                                                                                                                                                           |    |
|------------|-----------------------------------------|---------|----------|----------|----------|----------|-------------------------------------------------------------------------------------------------------------------------------------------------------------------------------------------------------------------------------------------------------------------------------------------------------------------------------------------------------------------------------------------------------------------------------------------------------------------------------------------------------------------------------------------------------------------------------------------------------------------------------------------------------------------------------------------------------------------------------------------------------------------------------------------|----|
| GO:0030336 | negative regulation of cell migration   | 9/2626  | 34/33142 | 0.001028 | 0.008613 | 0.006449 | N1178_c2_g1/TRINITY_DN2095_c0_g1/TRINITY_DN10569_c0_g2/TRINITY_DN1653_c0_g1/TRINITY_DN22883_c0_g1/TRINITY_DN16713_c0_g1/TRINITY_DN1313_c0_g2/TRINITY_DN10760_c0_g1/TRINITY_DN56782_c0_g1/TRINITY_DN22905_c0_g1/TRINITY_DN9158_c3_g1/TRINITY_DN12127_c0_g1/TRINITY_DN51821_c0_g1/TRINITY_DN709_c0_g1/TRINITY_DN7084_c0_g1/TRINITY_DN3120_c0_g1/TRINITY_DN7048_c0_g1/TRINITY_DN8167_c0_g1/TRINITY_DN56782_c0_g1/TRINITY_DN40503_c0_g1/TRINITY_DN4326_c0_g1/TRINITY_DN4137_c2_g1/TRINITY_DN5788_c1_g1/TRINITY_DN14134_c0_g1/TRINITY_DN5910_c0_g1/TRINITY_DN36816_c0_g1/TRINITY_DN14157_c0_g1/TRINITY_DN7577_c0_g1/TRINITY_DN965_c0_g1/TRINITY_DN13011_c0_g1/TRINITY_DN5678_c0_g1/TRINITY_DN58254_c0_g1/TRINITY_DN3032_c1_g2/TRINITY_DN33745_c0_g1/TRINITY_DN15502_c0_g1/TRINITY_DN4000_c0_g2 | 9  |
| GO:0071222 | cellular response to lipopolysaccharide | 9/2626  | 34/33142 | 0.001028 | 0.008613 | 0.006449 |                                                                                                                                                                                                                                                                                                                                                                                                                                                                                                                                                                                                                                                                                                                                                                                           | 9  |
| GO:0007218 | neuropeptide signaling pathway          | 12/2626 | 55/33142 | 0.001053 | 0.008773 | 0.006569 |                                                                                                                                                                                                                                                                                                                                                                                                                                                                                                                                                                                                                                                                                                                                                                                           | 12 |

|            |                                  |         |           |          |          |          |                                                                                                                                                                                                                                                                                                                                                                                                                                  |    |
|------------|----------------------------------|---------|-----------|----------|----------|----------|----------------------------------------------------------------------------------------------------------------------------------------------------------------------------------------------------------------------------------------------------------------------------------------------------------------------------------------------------------------------------------------------------------------------------------|----|
| GO:0030027 | lamellipodium                    | 12/2626 | 55/33142  | 0.001053 | 0.008773 | 0.006569 | TRINITY_DN3327_c0_g1/TRINITY_DN4329_c1_g1/TRINITY_DN10760_c0_g1/TRINITY_DN3363_c0_g1/TRINITY_DN93_c0_g1/TRINITY_DN5362_c0_g1/TRINITY_DN273_c1_g1/TRINITY_DN2094_c0_g1/TRINITY_DN39318_c0_g1/TRINITY_DN1908_c0_g1/TRINITY_DN13875_c0_g1/TRINITY_DN4487_c3_g2                                                                                                                                                                      | 12 |
| GO:0051015 | actin filament binding           | 20/2626 | 119/33142 | 0.001061 | 0.008813 | 0.006599 | TRINITY_DN6440_c0_g1/TRINITY_DN725_c5_g1/TRINITY_DN9277_c0_g1/TRINITY_DN9358_c0_g1/TRINITY_DN3740_c1_g1/TRINITY_DN1691_c0_g2/TRINITY_DN1908_c3_g1/TRINITY_DN47_c0_g1/TRINITY_DN4329_c1_g1/TRINITY_DN4441_c3_g1/TRINITY_DN5521_c0_g1/TRINITY_DN130_c0_g1/TRINITY_DN9935_c1_g1/TRINITY_DN5362_c0_g1/TRINITY_DN12127_c0_g1/TRINITY_DN2869_c2_g1/TRINITY_DN1186_c0_g1/TRINITY_DN2347_c1_g1/TRINITY_DN7420_c0_g1/TRINITY_DN6505_c0_g1 | 20 |
| GO:0031625 | ubiquitin protein ligase binding | 28/2626 | 190/33142 | 0.001074 | 0.008892 | 0.006658 | TRINITY_DN1936_c0_g1/TRINITY_DN21399_c0_g2/TRINITY_DN6834_c3_g1/TRINITY_DN                                                                                                                                                                                                                                                                                                                                                       | 28 |



|            |                                                      |         |          |          |         |          |                                                                                                                                                                                                                                                                                                                                                                                                                                                                                                                                                                                                                                                                                                                                         |    |
|------------|------------------------------------------------------|---------|----------|----------|---------|----------|-----------------------------------------------------------------------------------------------------------------------------------------------------------------------------------------------------------------------------------------------------------------------------------------------------------------------------------------------------------------------------------------------------------------------------------------------------------------------------------------------------------------------------------------------------------------------------------------------------------------------------------------------------------------------------------------------------------------------------------------|----|
| GO:0004314 | [acyl-carrier-protein] S-malonyltransferase activity | 10/2626 | 41/33142 | 0.001096 | 0.00897 | 0.006716 | DN8213_c0_g1/TRINITY_DN16674_c1_g3/TRINITY_DN954_c0_g1/TRINITY_DN20852_c0_g1/TRINITY_DN35198_c0_g1/TRINITY_DN36153_c0_g3/TRINITY_DN578_c1_g1/TRINITY_DN4644_c0_g1/TRINITY_DN6485_c0_g1/TRINITY_DN3983_c0_g1/TRINITY_DN233_c0_g1/TRINITY_DN7813_c0_g1/TRINITY_DN755_c1_g1/TRINITY_DN1765_c2_g1/TRINITY_DN3816_c0_g1/TRINITY_DN9935_c1_g1/TRINITY_DN9041_c0_g1/TRINITY_DN11156_c0_g5/TRINITY_DN2331_c0_g1/TRINITY_DN40503_c0_g1/TRINITY_DN3262_c0_g1/TRINITY_DN7200_c0_g2/TRINITY_DN9041_c0_g2/TRINITY_DN8343_c0_g1<br>TRINITY_DN606_c3_g1/TRINITY_DN19001_c0_g1/TRINITY_DN23921_c0_g1/TRINITY_DN482_c1_g1/TRINITY_DN29856_c0_g1/TRINITY_DN1549_c0_g1/TRINITY_DN40189_c0_g1/TRINITY_DN484_c0_g1/TRINITY_DN244_c3_g1/TRINITY_DN61025_c0_g1 | 10 |
|------------|------------------------------------------------------|---------|----------|----------|---------|----------|-----------------------------------------------------------------------------------------------------------------------------------------------------------------------------------------------------------------------------------------------------------------------------------------------------------------------------------------------------------------------------------------------------------------------------------------------------------------------------------------------------------------------------------------------------------------------------------------------------------------------------------------------------------------------------------------------------------------------------------------|----|

|            |                               |         |          |          |          |          |                                                                                                                                                                                                                                                                                                                                                                                                                                                                                                                                                                                                                                                                                                                                                                                                |    |
|------------|-------------------------------|---------|----------|----------|----------|----------|------------------------------------------------------------------------------------------------------------------------------------------------------------------------------------------------------------------------------------------------------------------------------------------------------------------------------------------------------------------------------------------------------------------------------------------------------------------------------------------------------------------------------------------------------------------------------------------------------------------------------------------------------------------------------------------------------------------------------------------------------------------------------------------------|----|
| GO:0007596 | blood coagulation             | 10/2626 | 41/33142 | 0.001096 | 0.00897  | 0.006716 | TRINITY_DN2738_c0_g1/TRINITY_DN5848_c0_g1/TRINITY_DN11048_c0_g1/TRINITY_DN23953_c0_g1/TRINITY_DN9755_c0_g1/TRINITY_DN7955_c1_g1/TRINITY_DN39494_c0_g1/TRINITY_DN2734_c0_g1/TRINITY_DN9853_c0_g1/TRINITY_DN9123_c0_g1/TRINITY_DN1748_c0_g1/TRINITY_DN5198_c0_g1/TRINITY_DN20958_c0_g1/TRINITY_DN41433_c0_g1/TRINITY_DN1229_c2_g1/TRINITY_DN20958_c0_g2/TRINITY_DN6805_c0_g1/TRINITY_DN33474_c0_g1/TRINITY_DN2094_c0_g1/TRINITY_DN4784_c1_g1/TRINITY_DN4223_c1_g1/TRINITY_DN2087_c0_g1/TRINITY_DN3614_c1_g1/TRINITY_DN9935_c1_g1/TRINITY_DN18317_c0_g1/TRINITY_DN10575_c2_g1/TRINITY_DN5362_c0_g1/TRINITY_DN8911_c1_g2/TRINITY_DN13875_c0_g1/TRINITY_DN4816_c0_g2/TRINITY_DN7437_c0_g1/TRINITY_DN8493_c0_g1/TRINITY_DN19075_c0_g1/TRINITY_DN2492_c0_g1/TRINITY_DN2009_c0_g1/TRINITY_DN5121_c0_g1 | 10 |
| GO:0007602 | phototransduction             | 10/2626 | 41/33142 | 0.001096 | 0.00897  | 0.006716 | TRINITY_DN2738_c0_g1/TRINITY_DN5848_c0_g1/TRINITY_DN11048_c0_g1/TRINITY_DN23953_c0_g1/TRINITY_DN9755_c0_g1/TRINITY_DN7955_c1_g1/TRINITY_DN39494_c0_g1/TRINITY_DN2734_c0_g1/TRINITY_DN9853_c0_g1/TRINITY_DN9123_c0_g1/TRINITY_DN1748_c0_g1/TRINITY_DN5198_c0_g1/TRINITY_DN20958_c0_g1/TRINITY_DN41433_c0_g1/TRINITY_DN1229_c2_g1/TRINITY_DN20958_c0_g2/TRINITY_DN6805_c0_g1/TRINITY_DN33474_c0_g1/TRINITY_DN2094_c0_g1/TRINITY_DN4784_c1_g1/TRINITY_DN4223_c1_g1/TRINITY_DN2087_c0_g1/TRINITY_DN3614_c1_g1/TRINITY_DN9935_c1_g1/TRINITY_DN18317_c0_g1/TRINITY_DN10575_c2_g1/TRINITY_DN5362_c0_g1/TRINITY_DN8911_c1_g2/TRINITY_DN13875_c0_g1/TRINITY_DN4816_c0_g2/TRINITY_DN7437_c0_g1/TRINITY_DN8493_c0_g1/TRINITY_DN19075_c0_g1/TRINITY_DN2492_c0_g1/TRINITY_DN2009_c0_g1/TRINITY_DN5121_c0_g1 | 10 |
| GO:0090630 | activation of GTPase activity | 10/2626 | 41/33142 | 0.001096 | 0.00897  | 0.006716 | TRINITY_DN2738_c0_g1/TRINITY_DN5848_c0_g1/TRINITY_DN11048_c0_g1/TRINITY_DN23953_c0_g1/TRINITY_DN9755_c0_g1/TRINITY_DN7955_c1_g1/TRINITY_DN39494_c0_g1/TRINITY_DN2734_c0_g1/TRINITY_DN9853_c0_g1/TRINITY_DN9123_c0_g1/TRINITY_DN1748_c0_g1/TRINITY_DN5198_c0_g1/TRINITY_DN20958_c0_g1/TRINITY_DN41433_c0_g1/TRINITY_DN1229_c2_g1/TRINITY_DN20958_c0_g2/TRINITY_DN6805_c0_g1/TRINITY_DN33474_c0_g1/TRINITY_DN2094_c0_g1/TRINITY_DN4784_c1_g1/TRINITY_DN4223_c1_g1/TRINITY_DN2087_c0_g1/TRINITY_DN3614_c1_g1/TRINITY_DN9935_c1_g1/TRINITY_DN18317_c0_g1/TRINITY_DN10575_c2_g1/TRINITY_DN5362_c0_g1/TRINITY_DN8911_c1_g2/TRINITY_DN13875_c0_g1/TRINITY_DN4816_c0_g2/TRINITY_DN7437_c0_g1/TRINITY_DN8493_c0_g1/TRINITY_DN19075_c0_g1/TRINITY_DN2492_c0_g1/TRINITY_DN2009_c0_g1/TRINITY_DN5121_c0_g1 | 10 |
| GO:0001523 | retinoid metabolic process    | 8/2626  | 28/33142 | 0.00113  | 0.009117 | 0.006826 | TRINITY_DN2738_c0_g1/TRINITY_DN5848_c0_g1/TRINITY_DN11048_c0_g1/TRINITY_DN23953_c0_g1/TRINITY_DN9755_c0_g1/TRINITY_DN7955_c1_g1/TRINITY_DN39494_c0_g1/TRINITY_DN2734_c0_g1/TRINITY_DN9853_c0_g1/TRINITY_DN9123_c0_g1/TRINITY_DN1748_c0_g1/TRINITY_DN5198_c0_g1/TRINITY_DN20958_c0_g1/TRINITY_DN41433_c0_g1/TRINITY_DN1229_c2_g1/TRINITY_DN20958_c0_g2/TRINITY_DN6805_c0_g1/TRINITY_DN33474_c0_g1/TRINITY_DN2094_c0_g1/TRINITY_DN4784_c1_g1/TRINITY_DN4223_c1_g1/TRINITY_DN2087_c0_g1/TRINITY_DN3614_c1_g1/TRINITY_DN9935_c1_g1/TRINITY_DN18317_c0_g1/TRINITY_DN10575_c2_g1/TRINITY_DN5362_c0_g1/TRINITY_DN8911_c1_g2/TRINITY_DN13875_c0_g1/TRINITY_DN4816_c0_g2/TRINITY_DN7437_c0_g1/TRINITY_DN8493_c0_g1/TRINITY_DN19075_c0_g1/TRINITY_DN2492_c0_g1/TRINITY_DN2009_c0_g1/TRINITY_DN5121_c0_g1 | 8  |

|            |                                                     |        |          |         |          |          |                                                                                                                                                                                                                                                                                                                                                                                                               |   |
|------------|-----------------------------------------------------|--------|----------|---------|----------|----------|---------------------------------------------------------------------------------------------------------------------------------------------------------------------------------------------------------------------------------------------------------------------------------------------------------------------------------------------------------------------------------------------------------------|---|
| GO:0004620 | phospholipase activity                              | 8/2626 | 28/33142 | 0.00113 | 0.009117 | 0.006826 | c0_g1/TRINITY_DN77404_c0_g1/TRINITY_DN56436_c0_g1<br>TRINITY_DN1568_c0_g2/TRINITY_DN4813_c0_g1/TRINITY_DN2848_c1_g1/TRINITY_DN2675_c0_g1/TRINITY_DN4211_c1_g3/TRINITY_DN18499_c0_g1/TRINITY_DN17391_c0_g1/TRINITY_DN26376_c0_g1/TRINITY_DN2006_c0_g1/TRINITY_DN1478_c1_g3/TRINITY_DN14468_c0_g1/TRINITY_DN10757_c0_g1/TRINITY_DN10798_c0_g1/TRINITY_DN11056_c1_g1/TRINITY_DN11061_c0_g2/TRINITY_DN38748_c0_g1 | 8 |
| GO:0019534 | toxin transmembrane transporter activity            | 8/2626 | 28/33142 | 0.00113 | 0.009117 | 0.006826 | TRINITY_DN1557_c0_g1/TRINITY_DN3007_c0_g1/TRINITY_DN2779_c1_g2/TRINITY_DN10569_c0_g2/TRINITY_DN2779_c1_g3/TRINITY_DN9853_c0_g1/TRINITY_DN4859_c0_g1/TRINITY_DN14134_c0_g1/TRINITY_DN2997_c0_g1/TRINITY_DN8066_c0_g1/TRINITY_DN57502_c0_g1/TRINITY_DN11631_c0_g3/TRINITY_DN3305_c0_g1/TRINITY_DN6810_c0_g1/TRINITY_DN1450_c0_g3/TRINITY_DN18007_c0_g1                                                          | 8 |
| GO:0032355 | response to estradiol                               | 8/2626 | 28/33142 | 0.00113 | 0.009117 | 0.006826 |                                                                                                                                                                                                                                                                                                                                                                                                               | 8 |
| GO:0080019 | fatty-acyl-CoA reductase (alcohol-forming) activity | 8/2626 | 28/33142 | 0.00113 | 0.009117 | 0.006826 |                                                                                                                                                                                                                                                                                                                                                                                                               | 8 |

|            |                                        |         |          |          |          |          |                                                                                                                                                                                                                                                                                                                                                                                                                                                                                                                                                                                                 |    |
|------------|----------------------------------------|---------|----------|----------|----------|----------|-------------------------------------------------------------------------------------------------------------------------------------------------------------------------------------------------------------------------------------------------------------------------------------------------------------------------------------------------------------------------------------------------------------------------------------------------------------------------------------------------------------------------------------------------------------------------------------------------|----|
| GO:0008364 | pupal chitin-based cuticle development | 7/2626  | 22/33142 | 0.001144 | 0.009198 | 0.006887 | TRINITY_DN7191_c0_g1/TRINITY_DN18146_c0_g1/TRINITY_DN9801_c0_g1/TRINITY_DN7191_c0_g2/TRINITY_DN34213_c0_g1/TRINITY_DN28886_c0_g1/TRINITY_DN16873_c0_g1                                                                                                                                                                                                                                                                                                                                                                                                                                          | 7  |
| GO:0048749 | compound eye development               | 15/2626 | 79/33142 | 0.001231 | 0.00987  | 0.00739  | TRINITY_DN3245_c0_g1/TRINITY_DN17739_c0_g2/TRINITY_DN12504_c0_g1/TRINITY_DN18321_c0_g1/TRINITY_DN2241_c0_g2/TRINITY_DN15411_c0_g1/TRINITY_DN9245_c0_g1/TRINITY_DN5091_c0_g1/TRINITY_DN4517_c0_g2/TRINITY_DN3636_c0_g3/TRINITY_DN3636_c0_g4/TRINITY_DN1941_c0_g1/TRINITY_DN61_c0_g1/TRINITY_DN3093_c0_g1/TRINITY_DN17100_c0_g1/TRINITY_DN21399_c0_g2/TRINITY_DN30262_c0_g1/TRINITY_DN8355_c0_g1/TRINITY_DN16407_c1_g1/TRINITY_DN4958_c0_g1/TRINITY_DN16593_c0_g1/TRINITY_DN3816_c0_g1/TRINITY_DN13726_c0_g1/TRINITY_DN13011_c0_g1/TRINITY_DN2938_c3_g1/TRINITY_DN7200_c0_g2/TRINITY_DN4000_c0_g2 | 15 |
| GO:0042391 | regulation of membrane potential       | 12/2626 | 56/33142 | 0.001245 | 0.009932 | 0.007437 |                                                                                                                                                                                                                                                                                                                                                                                                                                                                                                                                                                                                 | 12 |

|            |                                       |         |           |          |          |          |                                                                                                                                                                                                                                                                                                                                                                                                                                                                                                                                                                                                                                                                                                                                                                                                         |    |
|------------|---------------------------------------|---------|-----------|----------|----------|----------|---------------------------------------------------------------------------------------------------------------------------------------------------------------------------------------------------------------------------------------------------------------------------------------------------------------------------------------------------------------------------------------------------------------------------------------------------------------------------------------------------------------------------------------------------------------------------------------------------------------------------------------------------------------------------------------------------------------------------------------------------------------------------------------------------------|----|
| GO:0071805 | potassium ion transmembrane transport | 12/2626 | 56/33142  | 0.001245 | 0.009932 | 0.007437 | TRINITY_DN10654_c0_g1/TRINITY_DN6323_c1_g1/TRINITY_DN12107_c0_g1/TRINITY_DN16407_c1_g1/TRINITY_DN15030_c0_g2/TRINITY_DN16593_c0_g1/TRINITY_DN13726_c0_g1/TRINITY_DN14953_c0_g3/TRINITY_DN14377_c0_g1/TRINITY_DN30782_c0_g2/TRINITY_DN4021_c0_g2/TRINITY_DN7318_c0_g1<br>TRINITY_DN77781_c0_g1/TRINITY_DN1691_c0_g2/TRINITY_DN1908_c3_g1/TRINITY_DN60483_c1_g1/TRINITY_DN85_c0_g1/TRINITY_DN13564_c0_g1/TRINITY_DN16751_c0_g1/TRINITY_DN3636_c0_g3/TRINITY_DN3636_c0_g4<br>TRINITY_DN5310_c0_g2/TRINITY_DN6305_c1_g1/TRINITY_DN47_c0_g1/TRINITY_DN1120_c0_g2/TRINITY_DN5049_c0_g1/TRINITY_DN8217_c0_g1/TRINITY_DN6222_c0_g1/TRINITY_DN16954_c0_g1/TRINITY_DN3024_c0_g1/TRINITY_DN3400_c0_g1/TRINITY_DN2868_c0_g1/TRINITY_DN6081_c1_g2/TRINITY_DN377_c0_g1/TRINITY_DN3058_c0_g1/TRINITY_DN11154_c0_g1/TRI | 12 |
| GO:0003007 | heart morphogenesis                   | 9/2626  | 35/33142  | 0.001288 | 0.01024  | 0.007667 |                                                                                                                                                                                                                                                                                                                                                                                                                                                                                                                                                                                                                                                                                                                                                                                                         | 9  |
| GO:0005938 | cell cortex                           | 24/2626 | 156/33142 | 0.001298 | 0.010293 | 0.007707 |                                                                                                                                                                                                                                                                                                                                                                                                                                                                                                                                                                                                                                                                                                                                                                                                         | 24 |

|            |                                        |         |           |          |          |          |                                                                                                                                                                                                                                                                                                                                                                                                                                                                                                                                                                                                                                                                                                                                                                                    |    |
|------------|----------------------------------------|---------|-----------|----------|----------|----------|------------------------------------------------------------------------------------------------------------------------------------------------------------------------------------------------------------------------------------------------------------------------------------------------------------------------------------------------------------------------------------------------------------------------------------------------------------------------------------------------------------------------------------------------------------------------------------------------------------------------------------------------------------------------------------------------------------------------------------------------------------------------------------|----|
| GO:0004181 | metallocarboxypeptidase activity       | 10/2626 | 42/33142  | 0.001338 | 0.010574 | 0.007917 | NITY_DN8504_c0_g1/TRINITY_DN31678_c0_g1/TRINITY_DN898_c0_g1/TRINITY_DN2869_c2_g1/TRINITY_DN3459_c0_g1/TRINITY_DN8181_c0_g1/TRINITY_DN342_c0_g1/TRINITY_DN2347_c1_g1/TRINITY_DN6505_c0_g1<br>TRINITY_DN5956_c5_g1/TRINITY_DN2051_c0_g1/TRINITY_DN1919_c0_g1/TRINITY_DN5912_c0_g1/TRINITY_DN1773_c1_g2/TRINITY_DN4270_c0_g2/TRINITY_DN15913_c0_g1/TRINITY_DN4541_c0_g1/TRINITY_DN11117_c1_g1/TRINITY_DN579_c0_g1<br>TRINITY_DN11355_c0_g3/TRINITY_DN22690_c0_g1/TRINITY_DN2738_c0_g1/TRINITY_DN8297_c0_g1/TRINITY_DN740_c0_g1/TRINITY_DN2598_c0_g2/TRINITY_DN24893_c0_g1/TRINITY_DN6093_c0_g2/TRINITY_DN12127_c0_g1/TRINITY_DN6910_c0_g1/TRINITY_DN9123_c0_g1/TRINITY_DN2078_c0_g2/TRINITY_DN4816_c0_g2<br>TRINITY_DN658_c0_g1/TRINITY_DN8299_c0_g1/TRINITY_DN3327_c0_g1/TRINITY_DN7 | 10 |
| GO:0043547 | positive regulation of GTPase activity | 13/2626 | 64/33142  | 0.001341 | 0.010574 | 0.007917 |                                                                                                                                                                                                                                                                                                                                                                                                                                                                                                                                                                                                                                                                                                                                                                                    | 13 |
| GO:0048471 | perinuclear region of cytoplasm        | 42/2626 | 327/33142 | 0.001354 | 0.010641 | 0.007967 |                                                                                                                                                                                                                                                                                                                                                                                                                                                                                                                                                                                                                                                                                                                                                                                    | 42 |



|            |                                                                                                       |         |           |          |          |          |                                                                                                                                                                                                                                                                                                                                                                                                                                                                                                                                                           |    |
|------------|-------------------------------------------------------------------------------------------------------|---------|-----------|----------|----------|----------|-----------------------------------------------------------------------------------------------------------------------------------------------------------------------------------------------------------------------------------------------------------------------------------------------------------------------------------------------------------------------------------------------------------------------------------------------------------------------------------------------------------------------------------------------------------|----|
| GO:0010629 | negative regulation of gene expression                                                                | 17/2626 | 96/33142  | 0.001357 | 0.010641 | 0.007967 | c0_g1/TRINITY_DN4416_c0_g1/TRINITY_DN18471_c0_g2<br>TRINITY_DN3991_c0_g1/TRINITY_DN2578_c0_g1/TRINITY_DN32305_c0_g1/TRINITY_DN1893_c0_g1/TRINITY_DN4783_c0_g1/TRINITY_DN10890_c0_g1/TRINITY_DN3120_c0_g1/TRINITY_DN1990_c0_g1/TRINITY_DN1695_c0_g1/TRINITY_DN5049_c0_g1/TRINITY_DN5781_c0_g1/TRINITY_DN2682_c0_g1/TRINITY_DN9532_c0_g1/TRINITY_DN10569_c0_g2/TRINITY_DN9158_c3_g1/TRINITY_DN709_c0_g1/TRINITY_DN56840_c0_g1<br>TRINITY_DN6327_c1_g1/TRINITY_DN47_c0_g1/TRINITY_DN3762_c0_g1/TRINITY_DN1340_c0_g1/TRINITY_DN306_c1_g2/TRINITY_DN2746_c0_g1 | 17 |
| GO:0032391 | photoreceptor connecting cilium                                                                       | 6/2626  | 17/33142  | 0.001417 | 0.011077 | 0.008294 | TRINITY_DN788_c0_g2/TRINITY_DN12459_c0_g1/TRINITY_DN510_c0_g1/TRINITY_DN4155_c0_g1/TRINITY_DN8337_c0_g3/TRINITY_DN14638_c0_g1/TRINITY_DN2034_c0_g1/TRINITY_DN9929_c0_g1/TRINITY_DN80619_c0_g2/TRINITY_DN11949_c0_g2/TRINITY                                                                                                                                                                                                                                                                                                                               | 6  |
| GO:0016705 | oxidoreductase activity, acting on paired donors, with incorporation or reduction of molecular oxygen | 32/2626 | 231/33142 | 0.001428 | 0.011136 | 0.008338 |                                                                                                                                                                                                                                                                                                                                                                                                                                                                                                                                                           | 32 |



|            |                       |         |           |          |          |          |                                                                                                                                                                                                                                                                                                                                                                                                                                                                                                                                                                                                                                                                                                                                                                                                                |    |
|------------|-----------------------|---------|-----------|----------|----------|----------|----------------------------------------------------------------------------------------------------------------------------------------------------------------------------------------------------------------------------------------------------------------------------------------------------------------------------------------------------------------------------------------------------------------------------------------------------------------------------------------------------------------------------------------------------------------------------------------------------------------------------------------------------------------------------------------------------------------------------------------------------------------------------------------------------------------|----|
| GO:0016055 | Wnt signaling pathway | 20/2626 | 122/33142 | 0.001453 | 0.011211 | 0.008394 | _DN10323_c0_g1/TRINITY_DN9323_c0_g2/TRINITY_DN15512_c0_g1/TRINITY_DN6729_c0_g2/TRINITY_DN6729_c0_g3/TRINITY_DN3648_c0_g6/TRINITY_DN8718_c0_g1/TRINITY_DN6010_c3_g1/TRINITY_DN7771_c0_g2/TRINITY_DN996_c0_g1/TRINITY_DN5213_c0_g1/TRINITY_DN25933_c0_g2/TRINITY_DN33241_c0_g1/TRINITY_DN10120_c0_g1/TRINITY_DN8705_c0_g1/TRINITY_DN21490_c0_g1/TRINITY_DN10422_c0_g1/TRINITY_DN3753_c0_g1/TRINITY_DN5625_c1_g1/TRINITY_DN8029_c0_g2/TRINITY_DN7224_c1_g3/TRINITY_DN25846_c0_g2/TRINITY_DN34083_c0_g1/TRINITY_DN60341_c0_g1/TRINITY_DN7425_c6_g1/TRINITY_DN32249_c0_g1/TRINITY_DN383_c0_g1/TRINITY_DN2786_c0_g1/TRINITY_DN46257_c0_g1/TRINITY_DN806_c0_g2/TRINITY_DN9233_c0_g1/TRINITY_DN75_c2_g2/TRINITY_DN1406_c0_g1/TRINITY_DN5157_c0_g2/TRINITY_DN22905_c0_g1/TRINITY_DN77356_c0_g1/TRINITY_DN2869_c2_g1/TRI | 20 |
|------------|-----------------------|---------|-----------|----------|----------|----------|----------------------------------------------------------------------------------------------------------------------------------------------------------------------------------------------------------------------------------------------------------------------------------------------------------------------------------------------------------------------------------------------------------------------------------------------------------------------------------------------------------------------------------------------------------------------------------------------------------------------------------------------------------------------------------------------------------------------------------------------------------------------------------------------------------------|----|

|            |                           |        |          |          |          |          |                                                                                                                                                                                                                                                                                                                                                                                                                                                                                                                                                                                                                                                                                                                                                                          |   |
|------------|---------------------------|--------|----------|----------|----------|----------|--------------------------------------------------------------------------------------------------------------------------------------------------------------------------------------------------------------------------------------------------------------------------------------------------------------------------------------------------------------------------------------------------------------------------------------------------------------------------------------------------------------------------------------------------------------------------------------------------------------------------------------------------------------------------------------------------------------------------------------------------------------------------|---|
| GO:0007613 | memory                    | 8/2626 | 29/33142 | 0.001454 | 0.011211 | 0.008394 | NITY_DN6230_c4_g1/TRINITY_DN806_c0_g1/TRINITY_DN35596_c0_g1/TRINITY_DN6541_c1_g2/TRINITY_DN1084_c0_g1<br>TRINITY_DN9170_c1_g1/TRINITY_DN6515_c0_g1/TRINITY_DN2095_c0_g1/TRINITY_DN7045_c1_g1/TRINITY_DN428_c0_g1/TRINITY_DN2961_c0_g1/TRINITY_DN6409_c3_g1/TRINITY_DN18471_c0_g2<br>TRINITY_DN6657_c0_g1/TRINITY_DN9451_c0_g1/TRINITY_DN20881_c0_g2/TRINITY_DN18134_c0_g1/TRINITY_DN5914_c0_g1/TRINITY_DN2372_c0_g1/TRINITY_DN5968_c0_g1/TRINITY_DN3299_c0_g1<br>TRINITY_DN7191_c0_g1/TRINITY_DN18146_c0_g1/TRINITY_DN9801_c0_g1/TRINITY_DN7191_c0_g2/TRINITY_DN638_c1_g1/TRINITY_DN34213_c0_g1/TRINITY_DN28886_c0_g1/TRINITY_DN16873_c0_g1<br>TRINITY_DN10654_c0_g1/TRINITY_DN10841_c0_g1/TRINITY_DN17412_c0_g1/TRINITY_DN10545_c1_g1/TRINITY_DN12721_c0_g1/TRINITY_DN2 | 8 |
| GO:0036158 | outer dynein arm assembly | 8/2626 | 29/33142 | 0.001454 | 0.011211 | 0.008394 |                                                                                                                                                                                                                                                                                                                                                                                                                                                                                                                                                                                                                                                                                                                                                                          | 8 |
| GO:0046693 | sperm storage             | 8/2626 | 29/33142 | 0.001454 | 0.011211 | 0.008394 |                                                                                                                                                                                                                                                                                                                                                                                                                                                                                                                                                                                                                                                                                                                                                                          | 8 |
| GO:0005272 | sodium channel activity   | 7/2626 | 23/33142 | 0.001532 | 0.011306 | 0.008465 |                                                                                                                                                                                                                                                                                                                                                                                                                                                                                                                                                                                                                                                                                                                                                                          | 7 |

|            |                                                                |        |          |          |          |          |                                                                                                                                                                                        |   |
|------------|----------------------------------------------------------------|--------|----------|----------|----------|----------|----------------------------------------------------------------------------------------------------------------------------------------------------------------------------------------|---|
| GO:0050680 | negative regulation of epithelial cell proliferation           | 7/2626 | 23/33142 | 0.001532 | 0.011306 | 0.008465 | 003_c0_g1/TRINITY_DN19234_c0_g1<br>TRINITY_DN6327_c1_g1/TRINITY_DN19269_c0_g1/TRINITY_DN4002_c0_g3/TRINITY_DN11340_c0_g1/TRINITY_DN306_c1_g2/TRINITY_DN5362_c0_g1/TRINITY_DN4002_c0_g1 | 7 |
| GO:0031088 | platelet dense granule membrane                                | 5/2626 | 12/33142 | 0.001534 | 0.011306 | 0.008465 | TRINITY_DN406_c0_g3/TRINITY_DN5049_c0_g1/TRINITY_DN2999_c0_g1/TRINITY_DN406_c0_g2/TRINITY_DN42565_c0_g1                                                                                | 5 |
| GO:0035973 | aggrephagy                                                     | 5/2626 | 12/33142 | 0.001534 | 0.011306 | 0.008465 | TRINITY_DN16674_c1_g3/TRINITY_DN16674_c1_g2/TRINITY_DN4811_c0_g1/TRINITY_DN36153_c0_g3/TRINITY_DN1201_c3_g1                                                                            | 5 |
| GO:0040018 | positive regulation of multicellular organism growth           | 5/2626 | 12/33142 | 0.001534 | 0.011306 | 0.008465 | TRINITY_DN19520_c0_g1/TRINITY_DN669_c0_g1/TRINITY_DN338_c0_g1/TRINITY_DN8729_c1_g1/TRINITY_DN14134_c0_g1                                                                               | 5 |
| GO:0045433 | male courtship behavior, veined wing generated song production | 5/2626 | 12/33142 | 0.001534 | 0.011306 | 0.008465 | TRINITY_DN1748_c0_g1/TRINITY_DN32284_c0_g2/TRINITY_DN23750_c0_g1/TRINITY_DN2003_c0_g1/TRINITY_DN20249_c0_g1                                                                            | 5 |
| GO:0045861 | negative regulation of proteolysis                             | 5/2626 | 12/33142 | 0.001534 | 0.011306 | 0.008465 | TRINITY_DN16500_c1_g1/TRINITY_DN3123_c0_g1/TRINITY_DN233_c0_g1/TRINITY_D                                                                                                               | 5 |

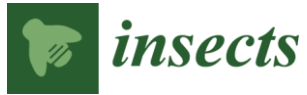

|            |                                |        |          |          |          |          |                                                                                                                                                                                                                                                             |   |
|------------|--------------------------------|--------|----------|----------|----------|----------|-------------------------------------------------------------------------------------------------------------------------------------------------------------------------------------------------------------------------------------------------------------|---|
| GO:0048286 | lung alveolus development      | 5/2626 | 12/33142 | 0.001534 | 0.011306 | 0.008465 | N3717_c0_g1/TRINITY_DN14093_c0_g1<br>TRINITY_DN3991_c0_g1/TRINITY_DN7048_c0_g1/TRINITY_DN2682_c0_g1/TRINITY_DN13138_c0_g1/TRINITY_DN2095_c0_g1<br>TRINITY_DN9375_c0_g1/TRINITY_DN27259_c0_g1/TRINITY_DN1765_c2_g1/TRINITY_DN7687_c0_g1/TRINITY_DN4674_c0_g1 | 5 |
| GO:0060076 | excitatory synapse             | 5/2626 | 12/33142 | 0.001534 | 0.011306 | 0.008465 | TRINITY_DN24800_c0_g1/TRINITY_DN434_c0_g1/TRINITY_DN595_c0_g3/TRINITY_DN9430_c1_g1/TRINITY_DN153517_c0_g1                                                                                                                                                   | 5 |
| GO:0102485 | dATP phosphohydrolase activity | 5/2626 | 12/33142 | 0.001534 | 0.011306 | 0.008465 | TRINITY_DN24800_c0_g1/TRINITY_DN434_c0_g1/TRINITY_DN595_c0_g3/TRINITY_DN9430_c1_g1/TRINITY_DN153517_c0_g1                                                                                                                                                   | 5 |
| GO:0102486 | dCTP phosphohydrolase activity | 5/2626 | 12/33142 | 0.001534 | 0.011306 | 0.008465 | TRINITY_DN24800_c0_g1/TRINITY_DN434_c0_g1/TRINITY_DN595_c0_g3/TRINITY_DN9430_c1_g1/TRINITY_DN153517_c0_g1                                                                                                                                                   | 5 |
| GO:0102487 | dUTP phosphohydrolase activity | 5/2626 | 12/33142 | 0.001534 | 0.011306 | 0.008465 | TRINITY_DN24800_c0_g1/TRINITY_DN434_c0_g1/TRINITY_DN595_c0_g3/TRINITY_DN9430_c1_g1/TRINITY_DN153517_c0_g1                                                                                                                                                   | 5 |
| GO:0102488 | dTTP phosphohydrolase activity | 5/2626 | 12/33142 | 0.001534 | 0.011306 | 0.008465 | TRINITY_DN24800_c0_g1/TRINITY_DN434_c0_g1/TRINITY_DN595_c0_g3/TRINITY_DN9430_c1_g1/TRINITY_DN153517_c0_g1                                                                                                                                                   | 5 |

|            |                                        |         |          |          |          |          |                                                                                                                                                                                              |    |
|------------|----------------------------------------|---------|----------|----------|----------|----------|----------------------------------------------------------------------------------------------------------------------------------------------------------------------------------------------|----|
| GO:0102489 | GTP phosphohydrolase activity          | 5/2626  | 12/33142 | 0.001534 | 0.011306 | 0.008465 | TRINITY_DN24800_c0_g1/TRINITY_DN434_c0_g1/TRINITY_DN595_c0_g3/TRINITY_DN9430_c1_g1/TRINITY_DN153517_c0_g1                                                                                    | 5  |
| GO:0102490 | 8-oxo-dGTP phosphohydrolase activity   | 5/2626  | 12/33142 | 0.001534 | 0.011306 | 0.008465 | TRINITY_DN24800_c0_g1/TRINITY_DN434_c0_g1/TRINITY_DN595_c0_g3/TRINITY_DN9430_c1_g1/TRINITY_DN153517_c0_g1                                                                                    | 5  |
| GO:0102491 | dGTP phosphohydrolase activity         | 5/2626  | 12/33142 | 0.001534 | 0.011306 | 0.008465 | TRINITY_DN24800_c0_g1/TRINITY_DN434_c0_g1/TRINITY_DN595_c0_g3/TRINITY_DN9430_c1_g1/TRINITY_DN153517_c0_g1                                                                                    | 5  |
| GO:1902667 | regulation of axon guidance            | 5/2626  | 12/33142 | 0.001534 | 0.011306 | 0.008465 | TRINITY_DN16600_c0_g1/TRINITY_DN2738_c0_g1/TRINITY_DN740_c0_g1/TRINITY_DN2598_c0_g2/TRINITY_DN9082_c0_g1                                                                                     | 5  |
| GO:0030030 | cell projection organization           | 9/2626  | 36/33142 | 0.001598 | 0.011746 | 0.008794 | TRINITY_DN47_c0_g1/TRINITY_DN7530_c0_g1/TRINITY_DN38928_c0_g2/TRINITY_DN1909_c0_g1/TRINITY_DN3767_c0_g1/TRINITY_DN2331_c0_g1/TRINITY_DN35591_c0_g1/TRINITY_DN9647_c0_g1/TRINITY_DN5578_c0_g1 | 9  |
| GO:0004970 | ionotropic glutamate receptor activity | 10/2626 | 43/33142 | 0.001621 | 0.011856 | 0.008877 | TRINITY_DN21399_c0_g2/TRINITY_DN16006_c0_g1/TRINITY_DN77056_c0_g1/TRINITY_DN8355_c0_g1/TRINITY_DN                                                                                            | 10 |

|            |                                                         |         |           |          |          |          |                                                                                                                                                                                                                                                                                                                                                                                                                                                                                                                                                                                                                                                                                                                                                                    |    |
|------------|---------------------------------------------------------|---------|-----------|----------|----------|----------|--------------------------------------------------------------------------------------------------------------------------------------------------------------------------------------------------------------------------------------------------------------------------------------------------------------------------------------------------------------------------------------------------------------------------------------------------------------------------------------------------------------------------------------------------------------------------------------------------------------------------------------------------------------------------------------------------------------------------------------------------------------------|----|
| GO:0051056 | regulation of small GTPase mediated signal transduction | 10/2626 | 43/33142  | 0.001621 | 0.011856 | 0.008877 | 1765_c2_g1/TRINITY_DN3816_c0_g1/TRINITY_DN9041_c0_g1/TRINITY_DN15420_c0_g1/TRINITY_DN7200_c0_g2/TRINITY_DN9041_c0_g2<br>TRINITY_DN22690_c0_g1/TRINITY_DN8297_c0_g1/TRINITY_DN873_c0_g1/TRINITY_DN13983_c0_g1/TRINITY_DN935_c1_g1/TRINITY_DN24893_c0_g1/TRINITY_DN6093_c0_g2/TRINITY_DN5120_c0_g1/TRINITY_DN6674_c0_g1/TRINITY_DN10575_c2_g1<br>TRINITY_DN7426_c0_g1/TRINITY_DN4544_c0_g1/TRINITY_DN5871_c1_g1/TRINITY_DN1709_c0_g1/TRINITY_DN2557_c0_g2/TRINITY_DN2161_c0_g1/TRINITY_DN10760_c0_g1/TRINITY_DN1035_c0_g3/TRINITY_DN10811_c0_g1/TRINITY_DN10569_c0_g2/TRINITY_DN1517_c0_g1/TRINITY_DN14953_c0_g3/TRINITY_DN4641_c0_g1/TRINITY_DN7687_c0_g1/TRINITY_DN24632_c0_g1/TRINITY_DN3103_c0_g2/TRINITY_DN3103_c2_g1/TRINITY_DN4000_c0_g2/TRINITY_DN2961_c0_g1 | 10 |
| GO:0051260 | protein homooligomerization                             | 19/2626 | 115/33142 | 0.001717 | 0.012527 | 0.009379 |                                                                                                                                                                                                                                                                                                                                                                                                                                                                                                                                                                                                                                                                                                                                                                    | 19 |

|            |                                             |         |          |          |          |          |                                                                                                                                                                                                                                                                                          |    |
|------------|---------------------------------------------|---------|----------|----------|----------|----------|------------------------------------------------------------------------------------------------------------------------------------------------------------------------------------------------------------------------------------------------------------------------------------------|----|
| GO:0007010 | cytoskeleton organization                   | 13/2626 | 66/33142 | 0.0018   | 0.013063 | 0.009781 | TRINITY_DN6657_c0_g1/TRINITY_DN4400_c1_g1/TRINITY_DN309_c0_g1/TRINITY_DN15487_c0_g1/TRINITY_DN2241_c0_g2/TRINITY_DN130_c0_g1/TRINITY_DN9626_c0_g2/TRINITY_DN19224_c0_g1/TRINITY_DN10575_c2_g1/TRINITY_DN2281_c0_g1/TRINITY_DN10111_c0_g1/TRINITY_DN6106_c1_g1/TRINITY_DN4487_c3_g2       | 13 |
| GO:0045471 | response to ethanol                         | 13/2626 | 66/33142 | 0.0018   | 0.013063 | 0.009781 | TRINITY_DN77781_c0_g1/TRINITY_DN1843_c0_g2/TRINITY_DN15486_c0_g2/TRINITY_DN60483_c1_g1/TRINITY_DN1879_c0_g1/TRINITY_DN7743_c0_g1/TRINITY_DN11422_c0_g1/TRINITY_DN3916_c0_g1/TRINITY_DN10783_c0_g1/TRINITY_DN4859_c0_g1/TRINITY_DN31730_c0_g2/TRINITY_DN12958_c0_g1/TRINITY_DN33069_c0_g1 | 13 |
| GO:0035336 | long-chain fatty-acyl-CoA metabolic process | 8/2626  | 30/33142 | 0.001846 | 0.013328 | 0.009979 | TRINITY_DN2997_c0_g1/TRINITY_DN8066_c0_g1/TRINITY_DN57502_c0_g1/TRINITY_DN11631_c0_g3/TRINITY_DN3305_c0_g1/TRINITY_DN6810_c0_g1/TRINITY_DN1450_c0_g3/TRINITY_DN18007_c0_g1                                                                                                               | 8  |

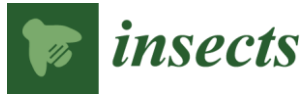

|            |                                                      |         |           |          |          |          |                                                                                                                                                                                                                                                                                                                                                                                                                                                                                                                                                                                                                                                                                                                                                                                                            |    |
|------------|------------------------------------------------------|---------|-----------|----------|----------|----------|------------------------------------------------------------------------------------------------------------------------------------------------------------------------------------------------------------------------------------------------------------------------------------------------------------------------------------------------------------------------------------------------------------------------------------------------------------------------------------------------------------------------------------------------------------------------------------------------------------------------------------------------------------------------------------------------------------------------------------------------------------------------------------------------------------|----|
| GO:0050830 | defense response to Gram-positive bacterium          | 8/2626  | 30/33142  | 0.001846 | 0.013328 | 0.009979 | TRINITY_DN6113_c0_g1/TRINITY_DN22536_c0_g1/TRINITY_DN9354_c0_g1/TRINITY_DN1338_c0_g1/TRINITY_DN28084_c0_g1/TRINITY_DN9798_c0_g1/TRINITY_DN2292_c2_g1/TRINITY_DN10426_c0_g1/TRINITY_DN5032_c1_g1/TRINITY_DN1854_c0_g2/TRINITY_DN180_c2_g1/TRINITY_DN2199_c2_g2/TRINITY_DN7107_c0_g1/TRINITY_DN28084_c0_g1/TRINITY_DN9175_c0_g1/TRINITY_DN16751_c0_g1/TRINITY_DN12176_c0_g1/TRINITY_DN40503_c0_g1/TRINITY_DN34926_c1_g1/TRINITY_DN9521_c0_g2/TRINITY_DN10258_c0_g1/TRINITY_DN13730_c0_g1/TRINITY_DN4137_c2_g1/TRINITY_DN4009_c0_g2/TRINITY_DN689_c0_g1/TRINITY_DN32305_c0_g1/TRINITY_DN16936_c0_g1/TRINITY_DN4687_c0_g1/TRINITY_DN6886_c3_g1/TRINITY_DN16674_c1_g3/TRINITY_DN5198_c0_g1/TRINITY_DN16674_c1_g2/TRINITY_DN1265_c0_g1/TRINITY_DN19269_c0_g1/TRINITY_DN8433_c1_g2/TRINITY_DN7858_c0_g1/TRINITY_D | 8  |
| GO:0030176 | integral component of endoplasmic reticulum membrane | 17/2626 | 99/33142  | 0.001918 | 0.013811 | 0.010341 | TRINITY_DN12176_c0_g1/TRINITY_DN40503_c0_g1/TRINITY_DN34926_c1_g1/TRINITY_DN9521_c0_g2/TRINITY_DN10258_c0_g1/TRINITY_DN13730_c0_g1/TRINITY_DN4137_c2_g1/TRINITY_DN4009_c0_g2/TRINITY_DN689_c0_g1/TRINITY_DN32305_c0_g1/TRINITY_DN16936_c0_g1/TRINITY_DN4687_c0_g1/TRINITY_DN6886_c3_g1/TRINITY_DN16674_c1_g3/TRINITY_DN5198_c0_g1/TRINITY_DN16674_c1_g2/TRINITY_DN1265_c0_g1/TRINITY_DN19269_c0_g1/TRINITY_DN8433_c1_g2/TRINITY_DN7858_c0_g1/TRINITY_D                                                                                                                                                                                                                                                                                                                                                     | 17 |
| GO:0031410 | cytoplasmic vesicle                                  | 20/2626 | 125/33142 | 0.001962 | 0.014077 | 0.01054  | TRINITY_DN6113_c0_g1/TRINITY_DN22536_c0_g1/TRINITY_DN9354_c0_g1/TRINITY_DN1338_c0_g1/TRINITY_DN28084_c0_g1/TRINITY_DN9798_c0_g1/TRINITY_DN2292_c2_g1/TRINITY_DN10426_c0_g1/TRINITY_DN5032_c1_g1/TRINITY_DN1854_c0_g2/TRINITY_DN180_c2_g1/TRINITY_DN2199_c2_g2/TRINITY_DN7107_c0_g1/TRINITY_DN28084_c0_g1/TRINITY_DN9175_c0_g1/TRINITY_DN16751_c0_g1/TRINITY_DN12176_c0_g1/TRINITY_DN40503_c0_g1/TRINITY_DN34926_c1_g1/TRINITY_DN9521_c0_g2/TRINITY_DN10258_c0_g1/TRINITY_DN13730_c0_g1/TRINITY_DN4137_c2_g1/TRINITY_DN4009_c0_g2/TRINITY_DN689_c0_g1/TRINITY_DN32305_c0_g1/TRINITY_DN16936_c0_g1/TRINITY_DN4687_c0_g1/TRINITY_DN6886_c3_g1/TRINITY_DN16674_c1_g3/TRINITY_DN5198_c0_g1/TRINITY_DN16674_c1_g2/TRINITY_DN1265_c0_g1/TRINITY_DN19269_c0_g1/TRINITY_DN8433_c1_g2/TRINITY_DN7858_c0_g1/TRINITY_D | 20 |



|            |                                                         |        |          |          |          |          |                                                                                                                                                                                                                                                                                                                                                                                                                                                                                                                                                                                                                                                                                                                                                              |   |
|------------|---------------------------------------------------------|--------|----------|----------|----------|----------|--------------------------------------------------------------------------------------------------------------------------------------------------------------------------------------------------------------------------------------------------------------------------------------------------------------------------------------------------------------------------------------------------------------------------------------------------------------------------------------------------------------------------------------------------------------------------------------------------------------------------------------------------------------------------------------------------------------------------------------------------------------|---|
| GO:0004714 | transmembrane receptor protein tyrosine kinase activity | 9/2626 | 37/33142 | 0.001965 | 0.014077 | 0.01054  | N19401_c0_g1/TRINITY_DN1252_c0_g1/TRINITY_DN1614_c0_g1/TRINITY_DN271_c0_g1/TRINITY_DN7045_c1_g1/TRINITY_DN8433_c1_g1/TRINITY_DN8911_c1_g2/TRINITY_DN6409_c3_g1/TRINITY_DN4816_c0_g2<br>TRINITY_DN2276_c0_g1/TRINITY_DN10609_c0_g1/TRINITY_DN6348_c0_g1/TRINITY_DN8625_c0_g1/TRINITY_DN339_c0_g2/TRINITY_DN9924_c0_g1/TRINITY_DN2321_c0_g1/TRINITY_DN4839_c0_g1/TRINITY_DN14663_c0_g1<br>TRINITY_DN4861_c0_g1/TRINITY_DN1568_c0_g1/TRINITY_DN7743_c0_g1/TRINITY_DN2675_c0_g1/TRINITY_DN7326_c0_g1/TRINITY_DN33241_c0_g1<br>TRINITY_DN1748_c0_g1/TRINITY_DN5470_c0_g1/TRINITY_DN627_c0_g1/TRINITY_DN11154_c0_g1/TRINITY_DN4029_c0_g1/TRINITY_DN33662_c0_g1<br>TRINITY_DN2738_c0_g1/TRINITY_DN13406_c0_g1/TRINITY_DN740_c0_g1/TRINITY_DN2598_c0_g2/TRINITY_DN14 | 9 |
| GO:0043434 | response to peptide hormone                             | 6/2626 | 18/33142 | 0.001983 | 0.014103 | 0.010559 |                                                                                                                                                                                                                                                                                                                                                                                                                                                                                                                                                                                                                                                                                                                                                              | 6 |
| GO:0046928 | regulation of neurotransmitter secretion                | 6/2626 | 18/33142 | 0.001983 | 0.014103 | 0.010559 |                                                                                                                                                                                                                                                                                                                                                                                                                                                                                                                                                                                                                                                                                                                                                              | 6 |
| GO:0070507 | regulation of microtubule cytoskeleton organization     | 6/2626 | 18/33142 | 0.001983 | 0.014103 | 0.010559 |                                                                                                                                                                                                                                                                                                                                                                                                                                                                                                                                                                                                                                                                                                                                                              | 6 |

|            |                                                         |         |          |          |          |          |                                                                                                                                                                                                                                                                                                                                                                                                                                                      |    |
|------------|---------------------------------------------------------|---------|----------|----------|----------|----------|------------------------------------------------------------------------------------------------------------------------------------------------------------------------------------------------------------------------------------------------------------------------------------------------------------------------------------------------------------------------------------------------------------------------------------------------------|----|
| GO:0030426 | growth cone                                             | 12/2626 | 59/33142 | 0.002002 | 0.014199 | 0.010631 | 663_c0_g1/TRINITY_DN5922_c0_g1<br>TRINITY_DN205_c0_g1/TRINITY_DN3327_c0_g1/TRINITY_DN16186_c0_g1/TRINITY_DN1265_c0_g1/TRINITY_DN10760_c0_g1/TRINITY_DN1420_c0_g1/TRINITY_DN8217_c1_g1/TRINITY_DN3665_c0_g1/TRINITY_DN9175_c0_g1/TRINITY_DN93_c0_g1/TRINITY_DN2746_c0_g1/TRINITY_DN26727_c0_g1<br>TRINITY_DN5364_c0_g1/TRINITY_DN5086_c0_g1/TRINITY_DN10873_c0_g1/TRINITY_DN1765_c2_g1/TRINITY_DN10569_c0_g2/TRINITY_DN7687_c0_g1/TRINITY_DN333_c0_g1 | 12 |
| GO:0001540 | amyloid-beta binding                                    | 7/2626  | 24/33142 | 0.002017 | 0.014199 | 0.010631 | TRINITY_DN5463_c0_g2/TRINITY_DN2352_c0_g2/TRINITY_DN13467_c0_g1/TRINITY_DN1117_c1_g1/TRINITY_DN50069_c0_g1/TRINITY_DN7439_c0_g1/TRINITY_DN4455_c0_g1                                                                                                                                                                                                                                                                                                 | 7  |
| GO:0005680 | anaphase-promoting complex                              | 7/2626  | 24/33142 | 0.002017 | 0.014199 | 0.010631 | TRINITY_DN658_c0_g1/TRINITY_DN14379_c0_g1/TRINITY_DN406_c0_g3/TRINITY_DN5049_c0_g1/TRINITY_DN2999_c0_g1                                                                                                                                                                                                                                                                                                                                              | 7  |
| GO:0048661 | positive regulation of smooth muscle cell proliferation | 7/2626  | 24/33142 | 0.002017 | 0.014199 | 0.010631 |                                                                                                                                                                                                                                                                                                                                                                                                                                                      | 7  |

|            |                                                                                       |         |          |          |          |          |                                                                                                                                                                                                                                                                                                                                                                                                                                                                                                                                                                                                                                                                                                                                                                                                                                                       |    |
|------------|---------------------------------------------------------------------------------------|---------|----------|----------|----------|----------|-------------------------------------------------------------------------------------------------------------------------------------------------------------------------------------------------------------------------------------------------------------------------------------------------------------------------------------------------------------------------------------------------------------------------------------------------------------------------------------------------------------------------------------------------------------------------------------------------------------------------------------------------------------------------------------------------------------------------------------------------------------------------------------------------------------------------------------------------------|----|
| GO:0015171 | amino acid transmembrane transporter activity                                         | 11/2626 | 52/33142 | 0.002188 | 0.015367 | 0.011506 | c0_g1/TRINITY_DN406_c0_g2<br>/TRINITY_DN42565_c0_g1<br>TRINITY_DN8323_c0_g1/TRI<br>NITY_DN3446_c0_g1/TRINIT<br>Y_DN6519_c0_g1/TRINITY_D<br>N43642_c0_g1/TRINITY_DN4<br>139_c0_g1/TRINITY_DN13394<br>_c0_g1/TRINITY_DN8012_c0_<br>g1/TRINITY_DN4307_c0_g1/T<br>RINITY_DN4384_c0_g1/TRIN<br>ITY_DN3638_c0_g2/TRINITY_<br>DN12101_c0_g2<br>TRINITY_DN406_c0_g3/TRIN<br>ITY_DN5049_c0_g1/TRINITY_<br>DN2999_c0_g1/TRINITY_DN4<br>06_c0_g2/TRINITY_DN42565_<br>c0_g1<br>TRINITY_DN3991_c0_g1/TRI<br>NITY_DN9375_c0_g1/TRINIT<br>Y_DN2682_c0_g1/TRINITY_D<br>N52030_c0_g1/TRINITY_DN4<br>9433_c0_g1<br>TRINITY_DN406_c0_g3/TRIN<br>ITY_DN5049_c0_g1/TRINITY_<br>DN2999_c0_g1/TRINITY_DN4<br>06_c0_g2/TRINITY_DN42565_<br>c0_g1<br>TRINITY_DN8323_c0_g1/TRI<br>NITY_DN3446_c0_g1/TRINIT<br>Y_DN13394_c0_g1/TRINITY_<br>DN8012_c0_g1/TRINITY_DN1<br>178_c2_g1 | 11 |
| GO:0015662 | ATPase activity, coupled to transmembrane movement of ions, phosphorylative mechanism | 5/2626  | 13/33142 | 0.002331 | 0.016143 | 0.012087 | TRINITY_DN406_c0_g3/TRIN<br>ITY_DN5049_c0_g1/TRINITY_<br>DN2999_c0_g1/TRINITY_DN4<br>06_c0_g2/TRINITY_DN42565_<br>c0_g1<br>TRINITY_DN3991_c0_g1/TRI<br>NITY_DN9375_c0_g1/TRINIT<br>Y_DN2682_c0_g1/TRINITY_D<br>N52030_c0_g1/TRINITY_DN4<br>9433_c0_g1<br>TRINITY_DN406_c0_g3/TRIN<br>ITY_DN5049_c0_g1/TRINITY_<br>DN2999_c0_g1/TRINITY_DN4<br>06_c0_g2/TRINITY_DN42565_<br>c0_g1<br>TRINITY_DN8323_c0_g1/TRI<br>NITY_DN3446_c0_g1/TRINIT<br>Y_DN13394_c0_g1/TRINITY_<br>DN8012_c0_g1/TRINITY_DN1<br>178_c2_g1                                                                                                                                                                                                                                                                                                                                         | 5  |
| GO:0019233 | sensory perception of pain                                                            | 5/2626  | 13/33142 | 0.002331 | 0.016143 | 0.012087 | TRINITY_DN406_c0_g3/TRIN<br>ITY_DN5049_c0_g1/TRINITY_<br>DN2999_c0_g1/TRINITY_DN4<br>06_c0_g2/TRINITY_DN42565_<br>c0_g1<br>TRINITY_DN3991_c0_g1/TRI<br>NITY_DN9375_c0_g1/TRINIT<br>Y_DN2682_c0_g1/TRINITY_D<br>N52030_c0_g1/TRINITY_DN4<br>9433_c0_g1<br>TRINITY_DN406_c0_g3/TRIN<br>ITY_DN5049_c0_g1/TRINITY_<br>DN2999_c0_g1/TRINITY_DN4<br>06_c0_g2/TRINITY_DN42565_<br>c0_g1<br>TRINITY_DN8323_c0_g1/TRI<br>NITY_DN3446_c0_g1/TRINIT<br>Y_DN13394_c0_g1/TRINITY_<br>DN8012_c0_g1/TRINITY_DN1<br>178_c2_g1                                                                                                                                                                                                                                                                                                                                         | 5  |
| GO:0043225 | ATPase-coupled anion transmembrane transporter activity                               | 5/2626  | 13/33142 | 0.002331 | 0.016143 | 0.012087 | TRINITY_DN406_c0_g3/TRIN<br>ITY_DN5049_c0_g1/TRINITY_<br>DN2999_c0_g1/TRINITY_DN4<br>06_c0_g2/TRINITY_DN42565_<br>c0_g1<br>TRINITY_DN3991_c0_g1/TRI<br>NITY_DN9375_c0_g1/TRINIT<br>Y_DN2682_c0_g1/TRINITY_D<br>N52030_c0_g1/TRINITY_DN4<br>9433_c0_g1<br>TRINITY_DN406_c0_g3/TRIN<br>ITY_DN5049_c0_g1/TRINITY_<br>DN2999_c0_g1/TRINITY_DN4<br>06_c0_g2/TRINITY_DN42565_<br>c0_g1<br>TRINITY_DN8323_c0_g1/TRI<br>NITY_DN3446_c0_g1/TRINIT<br>Y_DN13394_c0_g1/TRINITY_<br>DN8012_c0_g1/TRINITY_DN1<br>178_c2_g1                                                                                                                                                                                                                                                                                                                                         | 5  |
| GO:0097484 | dendrite extension                                                                    | 5/2626  | 13/33142 | 0.002331 | 0.016143 | 0.012087 | TRINITY_DN406_c0_g3/TRIN<br>ITY_DN5049_c0_g1/TRINITY_<br>DN2999_c0_g1/TRINITY_DN4<br>06_c0_g2/TRINITY_DN42565_<br>c0_g1<br>TRINITY_DN3991_c0_g1/TRI<br>NITY_DN9375_c0_g1/TRINIT<br>Y_DN2682_c0_g1/TRINITY_D<br>N52030_c0_g1/TRINITY_DN4<br>9433_c0_g1<br>TRINITY_DN406_c0_g3/TRIN<br>ITY_DN5049_c0_g1/TRINITY_<br>DN2999_c0_g1/TRINITY_DN4<br>06_c0_g2/TRINITY_DN42565_<br>c0_g1<br>TRINITY_DN8323_c0_g1/TRI<br>NITY_DN3446_c0_g1/TRINIT<br>Y_DN13394_c0_g1/TRINITY_<br>DN8012_c0_g1/TRINITY_DN1<br>178_c2_g1                                                                                                                                                                                                                                                                                                                                         | 5  |

|            |                                                      |         |           |          |          |          |                                                                                                                                                                                                                    |    |
|------------|------------------------------------------------------|---------|-----------|----------|----------|----------|--------------------------------------------------------------------------------------------------------------------------------------------------------------------------------------------------------------------|----|
| GO:0007528 | neuromuscular junction development                   | 10/2626 | 45/33142  | 0.002333 | 0.016143 | 0.012087 | TRINITY_DN21789_c0_g1/TRINITY_DN3245_c0_g1/TRINITY_DN2738_c0_g1/TRINITY_DN5470_c0_g1/TRINITY_DN8832_c1_g1/TRINITY_DN740_c0_g1/TRINITY_DN2598_c0_g2/TRINITY_DN11938_c0_g1/TRINITY_DN3103_c0_g2/TRINITY_DN3103_c2_g1 | 10 |
| GO:0010976 | positive regulation of neuron projection development | 10/2626 | 45/33142  | 0.002333 | 0.016143 | 0.012087 | TRINITY_DN5056_c0_g1/TRINITY_DN3327_c0_g1/TRINITY_DN10760_c0_g1/TRINITY_DN800_c0_g2/TRINITY_DN130_c0_g1/TRINITY_DN8278_c2_g1/TRINITY_DN3722_c0_g1/TRINITY_DN7084_c0_g1/TRINITY_DN12228_c1_g1/TRINITY_DN8692_c0_g1  | 10 |
| GO:0045494 | photoreceptor cell maintenance                       | 9/2626  | 38/33142  | 0.002396 | 0.016537 | 0.012382 | TRINITY_DN8493_c0_g1/TRINITY_DN6327_c1_g1/TRINITY_DN6174_c0_g1/TRINITY_DN7048_c0_g1/TRINITY_DN4043_c0_g1/TRINITY_DN1541_c0_g1/TRINITY_DN5795_c3_g1/TRINITY_DN6945_c0_g2/TRINITY_DN2094_c0_g1                       | 9  |
| GO:0048813 | dendrite morphogenesis                               | 18/2626 | 110/33142 | 0.002497 | 0.017194 | 0.012874 | TRINITY_DN2578_c0_g1/TRINITY_DN8323_c0_g1/TRINITY_DN3446_c0_g1/TRINITY_DN3245_c0_g1/TRINITY_DN2244_c1_g1/TRINITY_DN9767_c0_g3/TRINITY_DN2133_c0_g1                                                                 | 18 |

|            |                                                |         |          |          |          |          |                                                                                                                                                                                                                                                                                                                                                                                                                                                                                                                                                                                                                                                                                                                                                                                          |    |
|------------|------------------------------------------------|---------|----------|----------|----------|----------|------------------------------------------------------------------------------------------------------------------------------------------------------------------------------------------------------------------------------------------------------------------------------------------------------------------------------------------------------------------------------------------------------------------------------------------------------------------------------------------------------------------------------------------------------------------------------------------------------------------------------------------------------------------------------------------------------------------------------------------------------------------------------------------|----|
| GO:0005546 | phosphatidylinositol-4, 5-bisphosphate binding | 11/2626 | 53/33142 | 0.002567 | 0.017631 | 0.013201 | /TRINITY_DN13394_c0_g1/TRINITY_DN8903_c0_g1/TRINITY_DN37845_c0_g1/TRINITY_DN8012_c0_g1/TRINITY_DN2424_c0_g1/TRINITY_DN8217_c1_g1/TRINITY_DN43399_c0_g1/TRINITY_DN27045_c0_g1/TRINITY_DN446_c1_g1/TRINITY_DN3545_c0_g1/TRINITY_DN2756_c0_g1/TRINITY_DN2629_c0_g1/TRINITY_DN2531_c0_g1/TRINITY_DN16407_c1_g1/TRINITY_DN8977_c0_g1/TRINITY_DN17565_c0_g1/TRINITY_DN1775_c0_g3/TRINITY_DN2165_c3_g1/TRINITY_DN5362_c0_g1/TRINITY_DN342_c0_g1/TRINITY_DN3890_c0_g1/TRINITY_DN6505_c0_g1/TRINITY_DN3217_c0_g1/TRINITY_DN1883_c0_g1/TRINITY_DN5239_c1_g2/TRINITY_DN2445_c0_g1/TRINITY_DN1541_c0_g1/TRINITY_DN12413_c0_g1/TRINITY_DN669_c0_g1/TRINITY_DN7437_c0_g1/TRINITY_DN5629_c0_g1/TRINITY_DN6108_c0_g1/TRINITY_DN10760_c0_g1/TRINITY_DN9843_c0_g1/TRINITY_DN4326_c0_g1/TRINITY_DN2078_c0_g | 11 |
| GO:0003707 | steroid hormone receptor activity              | 7/2626  | 25/33142 | 0.002612 | 0.017896 | 0.013399 |                                                                                                                                                                                                                                                                                                                                                                                                                                                                                                                                                                                                                                                                                                                                                                                          | 7  |
| GO:0017124 | SH3 domain binding                             | 12/2626 | 61/33142 | 0.002689 | 0.018188 | 0.013618 |                                                                                                                                                                                                                                                                                                                                                                                                                                                                                                                                                                                                                                                                                                                                                                                          | 12 |

|            |                                   |         |          |          |          |          |                                                                                                                                                                                                                                                                                                                                                                                                                                                                                                                                                                                                                                                                                                                                                               |    |
|------------|-----------------------------------|---------|----------|----------|----------|----------|---------------------------------------------------------------------------------------------------------------------------------------------------------------------------------------------------------------------------------------------------------------------------------------------------------------------------------------------------------------------------------------------------------------------------------------------------------------------------------------------------------------------------------------------------------------------------------------------------------------------------------------------------------------------------------------------------------------------------------------------------------------|----|
| GO:0030198 | extracellular matrix organization | 12/2626 | 61/33142 | 0.002689 | 0.018188 | 0.013618 | 2/TRINITY_DN14709_c0_g1/TRINITY_DN428_c0_g1/TRINITY_DN9107_c0_g1/TRINITY_DN6505_c0_g1/TRINITY_DN12228_c1_g1/TRINITY_DN950_c4_g1/TRINITY_DN5239_c1_g2/TRINITY_DN1266_c0_g1/TRINITY_DN15399_c0_g1/TRINITY_DN2476_c1_g1/TRINITY_DN18049_c0_g1/TRINITY_DN56782_c0_g1/TRINITY_DN2281_c0_g1/TRINITY_DN5908_c0_g1/TRINITY_DN13862_c0_g2/TRINITY_DN12958_c0_g1/TRINITY_DN16986_c0_g2/TRINITY_DN4032_c0_g1/TRINITY_DN1487_c0_g2/TRINITY_DN4544_c0_g1/TRINITY_DN200_c0_g2/TRINITY_DN5859_c0_g1/TRINITY_DN1420_c0_g1/TRINITY_DN35269_c0_g1/TRINITY_DN1532_c0_g1/TRINITY_DN55372_c0_g1/TRINITY_DN273_c1_g1/TRINITY_DN11061_c0_g2/TRINITY_DN12650_c0_g1/TRINITY_DN901_c0_g1/TRINITY_DN52030_c0_g1/TRINITY_DN1557_c0_g1/TRINITY_DN4169_c0_g2/TRINITY_DN4169_c0_g1/TRINITY_D | 12 |
| GO:0008021 | synaptic vesicle                  | 14/2626 | 77/33142 | 0.002697 | 0.018188 | 0.013618 |                                                                                                                                                                                                                                                                                                                                                                                                                                                                                                                                                                                                                                                                                                                                                               | 14 |
| GO:0007413 | axonal fasciculation              | 6/2626  | 19/33142 | 0.002706 | 0.018188 | 0.013618 |                                                                                                                                                                                                                                                                                                                                                                                                                                                                                                                                                                                                                                                                                                                                                               | 6  |

|            |                                      |         |          |          |          |          |                                                                                                                                                                                          |    |
|------------|--------------------------------------|---------|----------|----------|----------|----------|------------------------------------------------------------------------------------------------------------------------------------------------------------------------------------------|----|
| GO:0009888 | tissue development                   | 6/2626  | 19/33142 | 0.002706 | 0.018188 | 0.013618 | N2475_c0_g1/TRINITY_DN13362_c0_g1/TRINITY_DN14663_c0_g1<br>TRINITY_DN1990_c0_g1/TRINITY_DN23921_c0_g1/TRINITY_DN1549_c0_g1/TRINITY_DN484_c0_g1/TRINITY_DN244_c3_g1/TRINITY_DN61025_c0_g1 | 6  |
| GO:0042811 | pheromone biosynthetic process       | 6/2626  | 19/33142 | 0.002706 | 0.018188 | 0.013618 | TRINITY_DN638_c1_g1/TRINITY_DN28084_c0_g1/TRINITY_DN6435_c0_g3/TRINITY_DN9779_c0_g1/TRINITY_DN5693_c0_g2/TRINITY_DN12549_c0_g1                                                           | 6  |
| GO:0045664 | regulation of neuron differentiation | 6/2626  | 19/33142 | 0.002706 | 0.018188 | 0.013618 | TRINITY_DN5296_c0_g1/TRINITY_DN8625_c0_g1/TRINITY_DN7687_c0_g1/TRINITY_DN4839_c0_g1/TRINITY_DN12889_c0_g1/TRINITY_DN4784_c1_g1                                                           | 6  |
| GO:0061512 | protein localization to cilium       | 6/2626  | 19/33142 | 0.002706 | 0.018188 | 0.013618 | TRINITY_DN15240_c0_g1/TRINITY_DN21912_c0_g1/TRINITY_DN2153_c0_g1/TRINITY_DN4554_c0_g1/TRINITY_DN7277_c2_g1/TRINITY_DN12092_c0_g3                                                         | 6  |
| GO:0005776 | autophagosome                        | 10/2626 | 46/33142 | 0.002773 | 0.018549 | 0.013888 | TRINITY_DN16674_c1_g3/TRINITY_DN16674_c1_g2/TRINITY_DN4811_c0_g1/TRINITY_DN36153_c0_g3/TRINITY_DN1201_c3_g1/TRINITY_DN3614                                                               | 10 |

|            |                            |         |          |          |          |          |                                                                                                                                                                                                                                                                                                                                                                                                                                                                                                                                                                                                                                                                                                                                                                                                                                                                                                                |    |
|------------|----------------------------|---------|----------|----------|----------|----------|----------------------------------------------------------------------------------------------------------------------------------------------------------------------------------------------------------------------------------------------------------------------------------------------------------------------------------------------------------------------------------------------------------------------------------------------------------------------------------------------------------------------------------------------------------------------------------------------------------------------------------------------------------------------------------------------------------------------------------------------------------------------------------------------------------------------------------------------------------------------------------------------------------------|----|
| GO:0042995 | cell projection            | 10/2626 | 46/33142 | 0.002773 | 0.018549 | 0.013888 | _c1_g1/TRINITY_DN75_c2_g1<br>/TRINITY_DN8911_c1_g2/TRI<br>NITY_DN901_c0_g1/TRINITY<br>_DN901_c0_g2<br>TRINITY_DN3245_c0_g1/TRI<br>NITY_DN4544_c0_g1/TRINIT<br>Y_DN235_c0_g1/TRINITY_D<br>N15574_c0_g1/TRINITY_DN2<br>557_c0_g2/TRINITY_DN1614_<br>c0_g1/TRINITY_DN130_c0_g1<br>/TRINITY_DN2372_c0_g1/TRI<br>NITY_DN8181_c0_g1/TRINIT<br>Y_DN7084_c0_g1<br>TRINITY_DN21789_c0_g1/TRI<br>NITY_DN4329_c1_g1/TRINIT<br>Y_DN8257_c0_g1/TRINITY_D<br>N32456_c0_g2/TRINITY_DN1<br>0076_c0_g1/TRINITY_DN4441<br>_c3_g1/TRINITY_DN2241_c0_<br>g2/TRINITY_DN2331_c0_g1/T<br>RINITY_DN144_c0_g1/TRINI<br>TY_DN77356_c0_g1/TRINITY<br>_DN339_c0_g2/TRINITY_DN2<br>281_c0_g1/TRINITY_DN23609<br>_c0_g1/TRINITY_DN14663_c0<br>_g1/TRINITY_DN1186_c0_g1/<br>TRINITY_DN2285_c0_g1<br>TRINITY_DN4002_c0_g3/TRI<br>NITY_DN3732_c0_g1/TRINIT<br>Y_DN9845_c0_g2/TRINITY_D<br>N9780_c0_g1/TRINITY_DN37<br>53_c0_g1/TRINITY_DN4002_c | 10 |
| GO:0016477 | cell migration             | 16/2626 | 94/33142 | 0.002815 | 0.018784 | 0.014064 |                                                                                                                                                                                                                                                                                                                                                                                                                                                                                                                                                                                                                                                                                                                                                                                                                                                                                                                | 16 |
| GO:0001649 | osteoblast differentiation | 8/2626  | 32/33142 | 0.002878 | 0.019095 | 0.014297 |                                                                                                                                                                                                                                                                                                                                                                                                                                                                                                                                                                                                                                                                                                                                                                                                                                                                                                                | 8  |



|            |                                                 |         |           |          |          |          |                                                                                                                                                                                                                                                                                                                                                                                                                                                                                                                                                                                                                                                                                                                                                                                                              |    |
|------------|-------------------------------------------------|---------|-----------|----------|----------|----------|--------------------------------------------------------------------------------------------------------------------------------------------------------------------------------------------------------------------------------------------------------------------------------------------------------------------------------------------------------------------------------------------------------------------------------------------------------------------------------------------------------------------------------------------------------------------------------------------------------------------------------------------------------------------------------------------------------------------------------------------------------------------------------------------------------------|----|
| GO:0035159 | regulation of tube length, open tracheal system | 8/2626  | 32/33142  | 0.002878 | 0.019095 | 0.014297 | 0_g1/TRINITY_DN12650_c0_g1/TRINITY_DN40189_c0_g1/TRINITY_DN16444_c1_g1/TRINITY_DN2244_c1_g1/TRINITY_DN1990_c0_g1/TRINITY_DN1267_c0_g2/TRINITY_DN43399_c0_g1/TRINITY_DN27045_c0_g1/TRINITY_DN446_c1_g1/TRINITY_DN3178_c0_g1/TRINITY_DN9943_c0_g1/TRINITY_DN2841_c0_g1/TRINITY_DN2489_c0_g1/TRINITY_DN20439_c0_g1/TRINITY_DN15863_c0_g1/TRINITY_DN3725_c3_g1/TRINITY_DN20653_c0_g1/TRINITY_DN291_c0_g1/TRINITY_DN10783_c0_g1/TRINITY_DN5875_c0_g1/TRINITY_DN755_c1_g1/TRINITY_DN1902_c0_g1/TRINITY_DN6136_c0_g1/TRINITY_DN11938_c0_g1/TRINITY_DN51589_c0_g2/TRINITY_DN13614_c1_g1/TRINITY_DN3665_c0_g1/TRINITY_DN5267_c0_g1/TRINITY_DN9843_c0_g1/TRINITY_DN5234_c0_g1/TRINITY_DN6839_c2_g1/TRINITY_DN6910_c0_g1/TRINITY_DN5506_c0_g3/TRINITY_DN26007_c0_g2/TRINITY_DN4529_c4_g1/TRINITY_DN2011_c0_g1/TRINITY_D | 8  |
| GO:0035556 | intracellular signal transduction               | 30/2626 | 222/33142 | 0.002882 | 0.019095 | 0.014297 |                                                                                                                                                                                                                                                                                                                                                                                                                                                                                                                                                                                                                                                                                                                                                                                                              | 30 |

|            |                                                        |         |          |          |          |          |                                                                                                                                                                                                                                                                                                                                                                                                                                                                                                                                                                                                                                                                                                                                                                       |    |
|------------|--------------------------------------------------------|---------|----------|----------|----------|----------|-----------------------------------------------------------------------------------------------------------------------------------------------------------------------------------------------------------------------------------------------------------------------------------------------------------------------------------------------------------------------------------------------------------------------------------------------------------------------------------------------------------------------------------------------------------------------------------------------------------------------------------------------------------------------------------------------------------------------------------------------------------------------|----|
| GO:0005262 | calcium channel activity                               | 9/2626  | 39/33142 | 0.002899 | 0.019166 | 0.01435  | N22945_c0_g1/TRINITY_DN2094_c0_g1/TRINITY_DN26727_c0_g1/TRINITY_DN8692_c0_g1<br>g1<br>TRINITY_DN6597_c0_g1/TRINITY_DN8167_c0_g1/TRINITY_DN17739_c0_g2/TRINITY_DN3180_c0_g1/TRINITY_DN1156_c0_g5/TRINITY_DN18131_c0_g1/TRINITY_DN35025_c0_g1/TRINITY_DN4522_c0_g1/TRINITY_DN10344_c0_g1/TRINITY_DN2841_c0_g1/TRINITY_DN834_c1_g1/TRINITY_DN5470_c0_g1/TRINITY_DN5049_c0_g1/TRINITY_DN15308_c0_g2/TRINITY_DN1633_c0_g1/TRINITY_DN40503_c0_g1/TRINITY_DN6910_c0_g1/TRINITY_DN7687_c0_g1/TRINITY_DN5274_c0_g1/TRINITY_DN7523_c0_g1/TRINITY_DN3890_c0_g1/TRINITY_DN12650_c0_g1/TRINITY_DN6409_c3_g1/TRINITY_DN6505_c0_g1/TRINITY_DN3655_c4_g1/TRINITY_DN6775_c0_g2/TRINITY_DN3296_c0_g1/TRINITY_DN51821_c0_g1/TRINITY_DN645_c0_g1/TRINITY_DN443_c0_g1/TRINITY_DN6775_c0_g1 | 9  |
| GO:0098793 | presynapse                                             | 15/2626 | 87/33142 | 0.003307 | 0.021815 | 0.016334 |                                                                                                                                                                                                                                                                                                                                                                                                                                                                                                                                                                                                                                                                                                                                                                       | 15 |
| GO:0008138 | protein tyrosine/serine/threonine phosphatase activity | 7/2626  | 26/33142 | 0.003333 | 0.021853 | 0.016362 |                                                                                                                                                                                                                                                                                                                                                                                                                                                                                                                                                                                                                                                                                                                                                                       | 7  |



|            |                                       |        |          |          |          |          |                                                                                                                                                       |   |
|------------|---------------------------------------|--------|----------|----------|----------|----------|-------------------------------------------------------------------------------------------------------------------------------------------------------|---|
| GO:0047372 | acylglycerol lipase activity          | 7/2626 | 26/33142 | 0.003333 | 0.021853 | 0.016362 | TRINITY_DN1568_c0_g1/TRINITY_DN2675_c0_g1/TRINITY_DN4211_c1_g3/TRINITY_DN18499_c0_g1/TRINITY_DN15468_c0_g1/TRINITY_DN26376_c0_g1/TRINITY_DN5274_c0_g1 | 7 |
| GO:0005326 | neurotransmitter transporter activity | 5/2626 | 14/33142 | 0.003391 | 0.021853 | 0.016362 | TRINITY_DN183_c0_g1/TRINITY_DN5871_c1_g1/TRINITY_DN27259_c0_g1/TRINITY_DN4029_c0_g1/TRINITY_DN4674_c0_g1                                              | 5 |
| GO:0006836 | neurotransmitter transport            | 5/2626 | 14/33142 | 0.003391 | 0.021853 | 0.016362 | TRINITY_DN4032_c0_g1/TRINITY_DN18454_c0_g1/TRINITY_DN5859_c0_g1/TRINITY_DN19635_c0_g1/TRINITY_DN4029_c0_g1                                            | 5 |
| GO:0006937 | regulation of muscle contraction      | 5/2626 | 14/33142 | 0.003391 | 0.021853 | 0.016362 | TRINITY_DN16891_c0_g1/TRINITY_DN3032_c1_g2/TRINITY_DN982_c0_g1/TRINITY_DN39828_c0_g1/TRINITY_DN7318_c0_g1                                             | 5 |
| GO:0009566 | fertilization                         | 5/2626 | 14/33142 | 0.003391 | 0.021853 | 0.016362 | TRINITY_DN23053_c0_g1/TRINITY_DN18484_c0_g1/TRINITY_DN15863_c0_g1/TRINITY_DN5680_c0_g1/TRINITY_DN14429_c0_g1                                          | 5 |
| GO:0031941 | filamentous actin                     | 5/2626 | 14/33142 | 0.003391 | 0.021853 | 0.016362 | TRINITY_DN10760_c0_g1/TRINITY_DN5459_c0_g1/TRINITY_DN4441_c3_g1/TRINITY_DN471_c1_g1/TRINITY_DN51821_c0_g1                                             | 5 |

|            |                                           |        |          |          |          |          |                                                                                                                                                                                                |   |
|------------|-------------------------------------------|--------|----------|----------|----------|----------|------------------------------------------------------------------------------------------------------------------------------------------------------------------------------------------------|---|
| GO:0032100 | positive regulation of appetite           | 5/2626 | 14/33142 | 0.003391 | 0.021853 | 0.016362 | TRINITY_DN606_c3_g1/TRINITY_DN19001_c0_g1/TRINITY_DN1549_c0_g1/TRINITY_DN484_c0_g1/TRINITY_DN14134_c0_g1                                                                                       | 5 |
| GO:0050482 | arachidonic acid secretion                | 5/2626 | 14/33142 | 0.003391 | 0.021853 | 0.016362 | TRINITY_DN3991_c0_g1/TRINITY_DN2682_c0_g1/TRINITY_DN26504_c0_g2/TRINITY_DN29189_c0_g1/TRINITY_DN2413_c0_g1                                                                                     | 5 |
| GO:0060976 | coronary vasculature development          | 5/2626 | 14/33142 | 0.003391 | 0.021853 | 0.016362 | TRINITY_DN1893_c0_g1/TRINITY_DN2448_c0_g1/TRINITY_DN9110_c0_g1/TRINITY_DN9158_c3_g1/TRINITY_DN709_c0_g1                                                                                        | 5 |
| GO:0006103 | 2-oxoglutarate metabolic process          | 9/2626 | 40/33142 | 0.003482 | 0.022293 | 0.016692 | TRINITY_DN15486_c0_g2/TRINITY_DN18587_c0_g2/TRINITY_DN5262_c1_g1/TRINITY_DN6037_c0_g1/TRINITY_DN7264_c0_g1/TRINITY_DN5233_c1_g1/TRINITY_DN5675_c0_g1/TRINITY_DN7264_c0_g3/TRINITY_DN4895_c1_g1 | 9 |
| GO:0051124 | synaptic growth at neuromuscular junction | 9/2626 | 40/33142 | 0.003482 | 0.022293 | 0.016692 | TRINITY_DN9170_c1_g1/TRINITY_DN10783_c0_g1/TRINITY_DN1267_c0_g2/TRINITY_DN4620_c0_g1/TRINITY_DN4029_c0_g1/TRINITY_DN3103_c0_g2/TRINITY_DN428_c0_g1/TRINITY_DN3103_c2_g1/TRINITY_DN6589_c0_g1   | 9 |

|            |                                         |         |          |          |          |          |                                                                                                                                                                                                                                          |    |
|------------|-----------------------------------------|---------|----------|----------|----------|----------|------------------------------------------------------------------------------------------------------------------------------------------------------------------------------------------------------------------------------------------|----|
| GO:0042060 | wound healing                           | 11/2626 | 55/33142 | 0.003483 | 0.022293 | 0.016692 | TRINITY_DN1557_c0_g1/TRINITY_DN14835_c0_g1/TRINITY_DN5680_c0_g1/TRINITY_DN6348_c0_g1/TRINITY_DN9245_c0_g1/TRINITY_DN3148_c0_g1/TRINITY_DN2869_c2_g1/TRINITY_DN2321_c0_g1/TRINITY_DN13862_c0_g2/TRINITY_DN1186_c0_g1/TRINITY_DN6589_c0_g1 | 11 |
| GO:0001738 | morphogenesis of a polarized epithelium | 6/2626  | 20/33142 | 0.003609 | 0.022845 | 0.017105 | TRINITY_DN2244_c1_g1/TRINITY_DN13406_c0_g1/TRINITY_DN43399_c0_g1/TRINITY_DN27045_c0_g1/TRINITY_DN2281_c0_g1/TRINITY_DN446_c1_g1                                                                                                          | 6  |
| GO:0006565 | L-serine catabolic process              | 6/2626  | 20/33142 | 0.003609 | 0.022845 | 0.017105 | TRINITY_DN1440_c0_g2/TRINITY_DN10554_c0_g2/TRINITY_DN10867_c0_g1/TRINITY_DN291_c1_g1/TRINITY_DN3638_c0_g1/TRINITY_DN17288_c0_g1                                                                                                          | 6  |
| GO:0007464 | R3/R4 cell fate commitment              | 6/2626  | 20/33142 | 0.003609 | 0.022845 | 0.017105 | TRINITY_DN2244_c1_g1/TRINITY_DN2133_c0_g1/TRINITY_DN43399_c0_g1/TRINITY_DN27045_c0_g1/TRINITY_DN446_c1_g1/TRINITY_DN6589_c0_g1                                                                                                           | 6  |
| GO:0016082 | synaptic vesicle priming                | 6/2626  | 20/33142 | 0.003609 | 0.022845 | 0.017105 | TRINITY_DN31967_c0_g1/TRINITY_DN11938_c0_g1/TRINITY_DN1420_c0_g1/TRINITY_DN25715_c0_g1/TRINITY_DN                                                                                                                                        | 6  |

|            |                        |         |           |          |          |          |                                                                                                                                                                                                                                                                                                                                                                                                                                                                                                                                                                                                                                                                                                                                                                                                                                                             |    |
|------------|------------------------|---------|-----------|----------|----------|----------|-------------------------------------------------------------------------------------------------------------------------------------------------------------------------------------------------------------------------------------------------------------------------------------------------------------------------------------------------------------------------------------------------------------------------------------------------------------------------------------------------------------------------------------------------------------------------------------------------------------------------------------------------------------------------------------------------------------------------------------------------------------------------------------------------------------------------------------------------------------|----|
| GO:0097729 | 9+2 motile cilium      | 6/2626  | 20/33142  | 0.003609 | 0.022845 | 0.017105 | 1532_c0_g1/TRINITY_DN1106<br>1_c0_g2<br>TRINITY_DN7740_c0_g1/TRI<br>NITY_DN9451_c0_g1/TRINIT<br>Y_DN18134_c0_g1/TRINITY_<br>DN9647_c0_g1/TRINITY_DN5<br>9259_c0_g1/TRINITY_DN6343<br>1_c0_g1<br>TRINITY_DN8323_c0_g1/TRI<br>NITY_DN3446_c0_g1/TRINIT<br>Y_DN8493_c0_g1/TRINITY_D<br>N4783_c0_g1/TRINITY_DN43<br>642_c0_g1/TRINITY_DN834_c<br>1_g1/TRINITY_DN13394_c0_g<br>1/TRINITY_DN5278_c0_g1/TR<br>INITY_DN8257_c0_g1/TRINIT<br>Y_DN8012_c0_g1/TRINITY_D<br>N6603_c0_g1/TRINITY_DN18<br>131_c0_g1/TRINITY_DN5454_<br>c0_g1/TRINITY_DN2085_c0_g<br>2/TRINITY_DN273_c1_g1/TRI<br>NITY_DN2006_c1_g2/TRINIT<br>Y_DN901_c0_g1/TRINITY_D<br>N901_c0_g2<br>TRINITY_DN6597_c0_g1/TRI<br>NITY_DN1748_c0_g1/TRINIT<br>Y_DN14379_c0_g1/TRINITY_<br>DN6174_c0_g1/TRINITY_DN8<br>167_c0_g1/TRINITY_DN17739<br>_c0_g2/TRINITY_DN15120_c0<br>_g1/TRINITY_DN3180_c0_g1/ | 6  |
| GO:0031902 | late endosome membrane | 18/2626 | 114/33142 | 0.003712 | 0.023445 | 0.017554 |                                                                                                                                                                                                                                                                                                                                                                                                                                                                                                                                                                                                                                                                                                                                                                                                                                                             | 18 |
| GO:0006816 | calcium ion transport  | 10/2626 | 48/33142  | 0.00385  | 0.024259 | 0.018163 |                                                                                                                                                                                                                                                                                                                                                                                                                                                                                                                                                                                                                                                                                                                                                                                                                                                             | 10 |

|            |                                        |         |          |          |          |          |                                                                                                                                                                                                                                                                                                                                                                                                                                                                                                                                                                                                                                                                                                                                                                                                          |    |
|------------|----------------------------------------|---------|----------|----------|----------|----------|----------------------------------------------------------------------------------------------------------------------------------------------------------------------------------------------------------------------------------------------------------------------------------------------------------------------------------------------------------------------------------------------------------------------------------------------------------------------------------------------------------------------------------------------------------------------------------------------------------------------------------------------------------------------------------------------------------------------------------------------------------------------------------------------------------|----|
| GO:0006914 | autophagy                              | 16/2626 | 97/33142 | 0.003887 | 0.024438 | 0.018298 | TRINITY_DN35025_c0_g1/TRINITY_DN4522_c0_g1<br>TRINITY_DN2578_c0_g1/TRINITY_DN32305_c0_g1/TRINITY_DN5056_c0_g1/TRINITY_DN1748_c0_g1/TRINITY_DN7743_c0_g1/TRINITY_DN1169_c0_g1/TRINITY_DN36153_c0_g3/TRINITY_DN755_c1_g1/TRINITY_DN1178_c2_g1/TRINITY_DN3614_c1_g1/TRINITY_DN8278_c2_g1/TRINITY_DN4517_c0_g2/TRINITY_DN40503_c0_g1/TRINITY_DN8911_c1_g2/TRINITY_DN2611_c1_g1/TRINITY_DN1119_c0_g1<br>TRINITY_DN70231_c0_g1/TRINITY_DN11824_c0_g1/TRINITY_DN36027_c0_g1/TRINITY_DN66315_c3_g1/TRINITY_DN45601_c0_g1/TRINITY_DN2305_c2_g1/TRINITY_DN2479_c0_g1/TRINITY_DN66315_c1_g1/TRINITY_DN2058_c7_g1<br>TRINITY_DN7530_c0_g1/TRINITY_DN16032_c0_g1/TRINITY_DN2009_c0_g1/TRINITY_DN9292_c0_g1/TRINITY_DN2881_c0_g1/TRINITY_DN22883_c0_g1/TRINITY_DN2881_c0_g2/TRINITY_DN11858_c0_g1/TRINITY_DN7067_c0_g1 | 16 |
| GO:0003796 | lysozyme activity                      | 9/2626  | 41/33142 | 0.004153 | 0.025937 | 0.01942  |                                                                                                                                                                                                                                                                                                                                                                                                                                                                                                                                                                                                                                                                                                                                                                                                          | 9  |
| GO:0004550 | nucleoside diphosphate kinase activity | 9/2626  | 41/33142 | 0.004153 | 0.025937 | 0.01942  |                                                                                                                                                                                                                                                                                                                                                                                                                                                                                                                                                                                                                                                                                                                                                                                                          | 9  |

|            |                                                      |         |          |          |          |          |                                                                                                                                                                                                                                                                                                                                                                                                                                                                                                                                                                                                                                                                                                                                                                                                                    |    |
|------------|------------------------------------------------------|---------|----------|----------|----------|----------|--------------------------------------------------------------------------------------------------------------------------------------------------------------------------------------------------------------------------------------------------------------------------------------------------------------------------------------------------------------------------------------------------------------------------------------------------------------------------------------------------------------------------------------------------------------------------------------------------------------------------------------------------------------------------------------------------------------------------------------------------------------------------------------------------------------------|----|
| GO:0006536 | glutamate metabolic process                          | 9/2626  | 41/33142 | 0.004153 | 0.025937 | 0.01942  | TRINITY_DN9506_c0_g2/TRINITY_DN15486_c0_g2/TRINITY_DN9506_c0_g1/TRINITY_DN3007_c0_g1/TRINITY_DN2557_c0_g2/TRINITY_DN2779_c1_g2/TRINITY_DN6037_c0_g1/TRINITY_DN2779_c1_g3/TRINITY_DN4895_c1_g1<br>TRINITY_DN16186_c0_g1/TRINITY_DN20653_c0_g1/TRINITY_DN10760_c0_g1/TRINITY_DN3722_c0_g1/TRINITY_DN93_c0_g1/TRINITY_DN2951_c0_g1/TRINITY_DN8692_c0_g1<br>TRINITY_DN5056_c0_g1/TRINITY_DN22183_c0_g2/TRINITY_DN4210_c0_g1/TRINITY_DN15554_c0_g1/TRINITY_DN800_c0_g2/TRINITY_DN8278_c2_g1/TRINITY_DN33241_c0_g1/TRINITY_DN339_c0_g2/TRINITY_DN30302_c0_g1/TRINITY_DN23609_c0_g1/TRINITY_DN9041_c0_g2/TRINITY_DN14168_c0_g2/TRINITY_DN7258_c0_g1/TRINITY_DN13354_c0_g1/TRINITY_DN689_c0_g1/TRINITY_DN21399_c0_g1<br>TRINITY_DN439_c0_g1/TRINITY_DN11631_c0_g3/TRINITY_DN6790_c0_g1/TRINITY_DN1350_c0_g2/TRINITY_DN3312 | 9  |
| GO:0010977 | negative regulation of neuron projection development | 7/2626  | 27/33142 | 0.004195 | 0.026145 | 0.019576 |                                                                                                                                                                                                                                                                                                                                                                                                                                                                                                                                                                                                                                                                                                                                                                                                                    | 7  |
| GO:0007417 | central nervous system development                   | 16/2626 | 98/33142 | 0.004311 | 0.026633 | 0.019941 |                                                                                                                                                                                                                                                                                                                                                                                                                                                                                                                                                                                                                                                                                                                                                                                                                    | 16 |
| GO:0035149 | lumen formation, open tracheal system                | 8/2626  | 34/33142 | 0.004311 | 0.026633 | 0.019941 |                                                                                                                                                                                                                                                                                                                                                                                                                                                                                                                                                                                                                                                                                                                                                                                                                    | 8  |



|            |                                                    |         |          |          |          |          |                                                                                                                                                                                                                                                                                                                                                                                                                                                                                                                                                                                                                                                                                                                                         |    |
|------------|----------------------------------------------------|---------|----------|----------|----------|----------|-----------------------------------------------------------------------------------------------------------------------------------------------------------------------------------------------------------------------------------------------------------------------------------------------------------------------------------------------------------------------------------------------------------------------------------------------------------------------------------------------------------------------------------------------------------------------------------------------------------------------------------------------------------------------------------------------------------------------------------------|----|
| GO:0051897 | positive regulation of protein kinase B signaling  | 8/2626  | 34/33142 | 0.004311 | 0.026633 | 0.019941 | _c0_g1/TRINITY_DN3305_c0_g1/TRINITY_DN6810_c0_g1/TRINITY_DN18007_c0_g1/TRINITY_DN23953_c0_g1/TRINITY_DN10783_c0_g1/TRINITY_DN9755_c0_g1/TRINITY_DN9853_c0_g1/TRINITY_DN1908_c0_g1/TRINITY_DN6505_c0_g1/TRINITY_DN7471_c0_g1/TRINITY_DN4784_c2_g1/TRINITY_DN8909_c0_g1/TRINITY_DN11372_c0_g1/TRINITY_DN7048_c0_g1/TRINITY_DN4514_c0_g1/TRINITY_DN30087_c1_g2/TRINITY_DN11204_c0_g1/TRINITY_DN9281_c0_g1/TRINITY_DN1852_c2_g1/TRINITY_DN1748_c0_g1/TRINITY_DN10890_c0_g1/TRINITY_DN5049_c0_g1/TRINITY_DN31967_c0_g1/TRINITY_DN2531_c0_g1/TRINITY_DN8977_c0_g1/TRINITY_DN10783_c0_g1/TRINITY_DN11938_c0_g1/TRINITY_DN4620_c0_g1/TRINITY_DN4029_c0_g1/TRINITY_DN2281_c0_g1/TRINITY_DN11061_c0_g2/TRINITY_DN6945_c0_g2/TRINITY_DN18471_c0_g2 | 8  |
| GO:0055088 | lipid homeostasis                                  | 8/2626  | 34/33142 | 0.004311 | 0.026633 | 0.019941 | TRINITY_DN606_c3_g1/TRINITY_DN19001_c0_g1/TRINITY                                                                                                                                                                                                                                                                                                                                                                                                                                                                                                                                                                                                                                                                                       | 8  |
| GO:0031594 | neuromuscular junction                             | 14/2626 | 81/33142 | 0.004352 | 0.026827 | 0.020087 |                                                                                                                                                                                                                                                                                                                                                                                                                                                                                                                                                                                                                                                                                                                                         | 14 |
| GO:0004315 | 3-oxoacyl-[acyl-carrier-protein] synthase activity | 10/2626 | 49/33142 | 0.0045   | 0.027555 | 0.020632 |                                                                                                                                                                                                                                                                                                                                                                                                                                                                                                                                                                                                                                                                                                                                         | 10 |

|            |                                 |         |          |          |          |          |                                                                                                                                                                                                                                                                                                                                                                                                                                                                                                                                                                                                                                                                                                                                              |    |
|------------|---------------------------------|---------|----------|----------|----------|----------|----------------------------------------------------------------------------------------------------------------------------------------------------------------------------------------------------------------------------------------------------------------------------------------------------------------------------------------------------------------------------------------------------------------------------------------------------------------------------------------------------------------------------------------------------------------------------------------------------------------------------------------------------------------------------------------------------------------------------------------------|----|
| GO:0042593 | glucose homeostasis             | 10/2626 | 49/33142 | 0.0045   | 0.027555 | 0.020632 | _DN23921_c0_g1/TRINITY_DN482_c1_g1/TRINITY_DN29856_c0_g1/TRINITY_DN1549_c0_g1/TRINITY_DN40189_c0_g1/TRINITY_DN484_c0_g1/TRINITY_DN244_c3_g1/TRINITY_DN61025_c0_g1/TRINITY_DN8485_c0_g1/TRINITY_DN15343_c0_g1/TRINITY_DN13981_c0_g1/TRINITY_DN1178_c2_g1/TRINITY_DN6365_c0_g1/TRINITY_DN9063_c0_g1/TRINITY_DN40503_c0_g1/TRINITY_DN39722_c0_g1/TRINITY_DN5908_c0_g1/TRINITY_DN7705_c0_g1/TRINITY_DN3120_c0_g1/TRINITY_DN1568_c0_g1/TRINITY_DN10137_c0_g1/TRINITY_DN1610_c0_g1/TRINITY_DN4849_c0_g1/TRINITY_DN9175_c0_g1/TRINITY_DN13011_c0_g1/TRINITY_DN3354_c0_g1/TRINITY_DN22945_c0_g1/TRINITY_DN6300_c0_g1/TRINITY_DN6327_c1_g1/TRINITY_DN5006_c0_g2/TRINITY_DN11340_c0_g1/TRINITY_DN5914_c0_g1/TRINITY_DN15411_c0_g1/TRINITY_DN4751_c0_g2 | 10 |
| GO:0051259 | protein complex oligomerization | 10/2626 | 49/33142 | 0.0045   | 0.027555 | 0.020632 | TRINITY_DN3120_c0_g1/TRINITY_DN1568_c0_g1/TRINITY_DN10137_c0_g1/TRINITY_DN1610_c0_g1/TRINITY_DN4849_c0_g1/TRINITY_DN9175_c0_g1/TRINITY_DN13011_c0_g1/TRINITY_DN3354_c0_g1/TRINITY_DN22945_c0_g1/TRINITY_DN6300_c0_g1/TRINITY_DN6327_c1_g1/TRINITY_DN5006_c0_g2/TRINITY_DN11340_c0_g1/TRINITY_DN5914_c0_g1/TRINITY_DN15411_c0_g1/TRINITY_DN4751_c0_g2                                                                                                                                                                                                                                                                                                                                                                                         | 10 |
| GO:0001947 | heart looping                   | 6/2626  | 21/33142 | 0.004718 | 0.028512 | 0.021348 | TRINITY_DN3120_c0_g1/TRINITY_DN1568_c0_g1/TRINITY_DN10137_c0_g1/TRINITY_DN1610_c0_g1/TRINITY_DN4849_c0_g1/TRINITY_DN9175_c0_g1/TRINITY_DN13011_c0_g1/TRINITY_DN3354_c0_g1/TRINITY_DN22945_c0_g1/TRINITY_DN6300_c0_g1/TRINITY_DN6327_c1_g1/TRINITY_DN5006_c0_g2/TRINITY_DN11340_c0_g1/TRINITY_DN5914_c0_g1/TRINITY_DN15411_c0_g1/TRINITY_DN4751_c0_g2                                                                                                                                                                                                                                                                                                                                                                                         | 6  |

|            |                                                                                  |        |          |          |          |          |                                                                                                                                   |   |
|------------|----------------------------------------------------------------------------------|--------|----------|----------|----------|----------|-----------------------------------------------------------------------------------------------------------------------------------|---|
| GO:0006919 | activation of cysteine-type endopeptidase activity involved in apoptotic process | 6/2626 | 21/33142 | 0.004718 | 0.028512 | 0.021348 | TRINITY_DN6327_c1_g1/TRINITY_DN1169_c0_g1/TRINITY_DN9158_c3_g1/TRINITY_DN709_c0_g1/TRINITY_DN56840_c0_g1/TRINITY_DN6505_c0_g1     | 6 |
| GO:0016079 | synaptic vesicle exocytosis                                                      | 6/2626 | 21/33142 | 0.004718 | 0.028512 | 0.021348 | TRINITY_DN9170_c1_g1/TRINITY_DN28373_c0_g1/TRINITY_DN25715_c0_g1/TRINITY_DN19224_c0_g1/TRINITY_DN4029_c0_g1/TRINITY_DN2165_c3_g1  | 6 |
| GO:0099055 | integral component of postsynaptic membrane                                      | 6/2626 | 21/33142 | 0.004718 | 0.028512 | 0.021348 | TRINITY_DN11100_c0_g1/TRINITY_DN9375_c0_g1/TRINITY_DN7687_c0_g1/TRINITY_DN12650_c0_g1/TRINITY_DN49433_c0_g1/TRINITY_DN18471_c0_g2 | 6 |
| GO:0001935 | endothelial cell proliferation                                                   | 5/2626 | 15/33142 | 0.004757 | 0.028512 | 0.021348 | TRINITY_DN5364_c0_g1/TRINITY_DN5086_c0_g1/TRINITY_DN40503_c0_g1/TRINITY_DN4137_c2_g1/TRINITY_DN333_c0_g1                          | 5 |
| GO:0005246 | calcium channel regulator activity                                               | 5/2626 | 15/33142 | 0.004757 | 0.028512 | 0.021348 | TRINITY_DN15120_c0_g1/TRINITY_DN22381_c0_g1/TRINITY_DN31435_c0_g1/TRINITY_DN32337_c0_g1/TRINITY_DN49433_c0_g1                     | 5 |
| GO:0034612 | response to tumor necrosis factor                                                | 5/2626 | 15/33142 | 0.004757 | 0.028512 | 0.021348 | TRINITY_DN1557_c0_g1/TRINITY_DN3007_c0_g1/TRINITY_DN6108_c0_g1/TRINITY_D                                                          | 5 |

|            |                                                                  |        |          |          |          |          |                                                                                                                                                                                                                                                                                                                                                                                                                                                                                                                                                                                                                                                                                                                                  |   |
|------------|------------------------------------------------------------------|--------|----------|----------|----------|----------|----------------------------------------------------------------------------------------------------------------------------------------------------------------------------------------------------------------------------------------------------------------------------------------------------------------------------------------------------------------------------------------------------------------------------------------------------------------------------------------------------------------------------------------------------------------------------------------------------------------------------------------------------------------------------------------------------------------------------------|---|
| GO:0042730 | fibrinolysis                                                     | 5/2626 | 15/33142 | 0.004757 | 0.028512 | 0.021348 | N2779_c1_g2/TRINITY_DN279_c1_g3<br>TRINITY_DN21131_c0_g2/TRINITY_DN11048_c0_g1/TRINITY_DN45371_c0_g1/TRINITY_DN2734_c0_g1/TRINITY_DN56782_c0_g1<br>TRINITY_DN2244_c1_g1/TRINITY_DN1990_c0_g1/TRINITY_DN43399_c0_g1/TRINITY_DN27045_c0_g1/TRINITY_DN446_c1_g1<br>TRINITY_DN1568_c0_g1/TRINITY_DN5364_c0_g1/TRINITY_DN5086_c0_g1/TRINITY_DN333_c0_g1/TRINITY_DN15502_c0_g1<br>TRINITY_DN6348_c0_g1/TRINITY_DN1902_c0_g1/TRINITY_DN14619_c0_g1/TRINITY_DN8625_c0_g1/TRINITY_DN339_c0_g2/TRINITY_DN9924_c0_g1/TRINITY_DN2321_c0_g1/TRINITY_DN4839_c0_g1/TRINITY_DN14663_c0_g1<br>TRINITY_DN6108_c0_g1/TRINITY_DN19520_c0_g1/TRINITY_DN17565_c0_g1/TRINITY_DN2327_c0_g1/TRINITY_DN10967_c0_g2/TRINITY_DN32376_c1_g1/TRINITY_DN93_c0_g | 5 |
| GO:0060071 | Wnt signaling pathway, planar cell polarity pathway              | 5/2626 | 15/33142 | 0.004757 | 0.028512 | 0.021348 | TRINITY_DN1990_c0_g1/TRINITY_DN43399_c0_g1/TRINITY_DN27045_c0_g1/TRINITY_DN446_c1_g1<br>TRINITY_DN1568_c0_g1/TRINITY_DN5364_c0_g1/TRINITY_DN5086_c0_g1/TRINITY_DN333_c0_g1/TRINITY_DN15502_c0_g1<br>TRINITY_DN6348_c0_g1/TRINITY_DN1902_c0_g1/TRINITY_DN14619_c0_g1/TRINITY_DN8625_c0_g1/TRINITY_DN339_c0_g2/TRINITY_DN9924_c0_g1/TRINITY_DN2321_c0_g1/TRINITY_DN4839_c0_g1/TRINITY_DN14663_c0_g1<br>TRINITY_DN6108_c0_g1/TRINITY_DN19520_c0_g1/TRINITY_DN17565_c0_g1/TRINITY_DN2327_c0_g1/TRINITY_DN10967_c0_g2/TRINITY_DN32376_c1_g1/TRINITY_DN93_c0_g                                                                                                                                                                         | 5 |
| GO:0070328 | triglyceride homeostasis                                         | 5/2626 | 15/33142 | 0.004757 | 0.028512 | 0.021348 | TRINITY_DN1568_c0_g1/TRINITY_DN5364_c0_g1/TRINITY_DN5086_c0_g1/TRINITY_DN333_c0_g1/TRINITY_DN15502_c0_g1<br>TRINITY_DN6348_c0_g1/TRINITY_DN1902_c0_g1/TRINITY_DN14619_c0_g1/TRINITY_DN8625_c0_g1/TRINITY_DN339_c0_g2/TRINITY_DN9924_c0_g1/TRINITY_DN2321_c0_g1/TRINITY_DN4839_c0_g1/TRINITY_DN14663_c0_g1<br>TRINITY_DN6108_c0_g1/TRINITY_DN19520_c0_g1/TRINITY_DN17565_c0_g1/TRINITY_DN2327_c0_g1/TRINITY_DN10967_c0_g2/TRINITY_DN32376_c1_g1/TRINITY_DN93_c0_g                                                                                                                                                                                                                                                                 | 5 |
| GO:0007169 | transmembrane receptor protein tyrosine kinase signaling pathway | 9/2626 | 42/33142 | 0.00492  | 0.029305 | 0.021942 | TRINITY_DN1568_c0_g1/TRINITY_DN5364_c0_g1/TRINITY_DN5086_c0_g1/TRINITY_DN333_c0_g1/TRINITY_DN15502_c0_g1<br>TRINITY_DN6348_c0_g1/TRINITY_DN1902_c0_g1/TRINITY_DN14619_c0_g1/TRINITY_DN8625_c0_g1/TRINITY_DN339_c0_g2/TRINITY_DN9924_c0_g1/TRINITY_DN2321_c0_g1/TRINITY_DN4839_c0_g1/TRINITY_DN14663_c0_g1<br>TRINITY_DN6108_c0_g1/TRINITY_DN19520_c0_g1/TRINITY_DN17565_c0_g1/TRINITY_DN2327_c0_g1/TRINITY_DN10967_c0_g2/TRINITY_DN32376_c1_g1/TRINITY_DN93_c0_g                                                                                                                                                                                                                                                                 | 9 |
| GO:0030307 | positive regulation of cell growth                               | 9/2626 | 42/33142 | 0.00492  | 0.029305 | 0.021942 | TRINITY_DN1568_c0_g1/TRINITY_DN5364_c0_g1/TRINITY_DN5086_c0_g1/TRINITY_DN333_c0_g1/TRINITY_DN15502_c0_g1<br>TRINITY_DN6348_c0_g1/TRINITY_DN1902_c0_g1/TRINITY_DN14619_c0_g1/TRINITY_DN8625_c0_g1/TRINITY_DN339_c0_g2/TRINITY_DN9924_c0_g1/TRINITY_DN2321_c0_g1/TRINITY_DN4839_c0_g1/TRINITY_DN14663_c0_g1<br>TRINITY_DN6108_c0_g1/TRINITY_DN19520_c0_g1/TRINITY_DN17565_c0_g1/TRINITY_DN2327_c0_g1/TRINITY_DN10967_c0_g2/TRINITY_DN32376_c1_g1/TRINITY_DN93_c0_g                                                                                                                                                                                                                                                                 | 9 |

|            |                                                                  |         |           |          |          |          |                                                                                                                                                                                                                                                                                                                                                                                                                                                                                                                                                                                                                                                                                                                                                                                                                 |    |
|------------|------------------------------------------------------------------|---------|-----------|----------|----------|----------|-----------------------------------------------------------------------------------------------------------------------------------------------------------------------------------------------------------------------------------------------------------------------------------------------------------------------------------------------------------------------------------------------------------------------------------------------------------------------------------------------------------------------------------------------------------------------------------------------------------------------------------------------------------------------------------------------------------------------------------------------------------------------------------------------------------------|----|
| GO:0070588 | calcium ion transmembrane transport                              | 9/2626  | 42/33142  | 0.00492  | 0.029305 | 0.021942 | g1/TRINITY_DN8729_c1_g1/TRINITY_DN1071_c0_g1<br>TRINITY_DN1748_c0_g1/TRINITY_DN10654_c0_g1/TRINITY_DN17739_c0_g2/TRINITY_DN15120_c0_g1/TRINITY_DN3180_c0_g1/TRINITY_DN18131_c0_g1/TRINITY_DN35025_c0_g1/TRINITY_DN2197_c0_g1/TRINITY_DN18471_c0_g2<br>TRINITY_DN8493_c0_g1/TRINITY_DN7048_c0_g1/TRINITY_DN406_c0_g3/TRINITY_DN4514_c0_g1/TRINITY_DN5690_c0_g1/TRINITY_DN5049_c0_g1/TRINITY_DN2999_c0_g1/TRINITY_DN1216_c2_g1/TRINITY_DN23353_c2_g1/TRINITY_DN5370_c0_g1/TRINITY_DN1852_c2_g1/TRINITY_DN406_c0_g2/TRINITY_DN10757_c0_g1/TRINITY_DN7045_c1_g1/TRINITY_DN7512_c0_g1/TRINITY_DN4554_c0_g1/TRINITY_DN19729_c0_g3/TRINITY_DN5012_c0_g1/TRINITY_DN1746_c0_g1/TRINITY_DN6225_c0_g1/TRINITY_DN6409_c3_g1/TRINITY_DN42565_c0_g1/TRINITY_DN38748_c0_g1<br>TRINITY_DN6597_c0_g1/TRINITY_DN16444_c1_g1/TRINI | 9  |
| GO:0042626 | ATPase activity, coupled to transmembrane movement of substances | 23/2626 | 163/33142 | 0.004936 | 0.029335 | 0.021964 |                                                                                                                                                                                                                                                                                                                                                                                                                                                                                                                                                                                                                                                                                                                                                                                                                 | 23 |
| GO:0006812 | cation transport                                                 | 15/2626 | 91/33142  | 0.005117 | 0.030349 | 0.022723 |                                                                                                                                                                                                                                                                                                                                                                                                                                                                                                                                                                                                                                                                                                                                                                                                                 | 15 |

|            |                      |         |           |          |          |          |                                                                                                                                                                                                                                                                                                                                                                                                                                                                                                                                                                                                                                                                                                                                                                                                                     |    |
|------------|----------------------|---------|-----------|----------|----------|----------|---------------------------------------------------------------------------------------------------------------------------------------------------------------------------------------------------------------------------------------------------------------------------------------------------------------------------------------------------------------------------------------------------------------------------------------------------------------------------------------------------------------------------------------------------------------------------------------------------------------------------------------------------------------------------------------------------------------------------------------------------------------------------------------------------------------------|----|
| GO:0005759 | mitochondrial matrix | 39/2626 | 321/33142 | 0.005154 | 0.030503 | 0.022838 | TY_DN8167_c0_g1/TRINITY_DN6323_c1_g1/TRINITY_DN2924_c1_g1/TRINITY_DN7737_c0_g1/TRINITY_DN1267_c0_g2/TRINITY_DN10811_c0_g1/TRINITY_DN7054_c0_g1/TRINITY_DN4220_c0_g1/TRINITY_DN15420_c0_g1/TRINITY_DN35025_c0_g1/TRINITY_DN4522_c0_g1/TRINITY_DN4784_c1_g1/TRINITY_DN56423_c0_g2/TRINITY_DN13575_c0_g1/TRINITY_DN9506_c0_g2/TRINITY_DN15486_c0_g2/TRINITY_DN8805_c1_g1/TRINITY_DN10162_c0_g1/TRINITY_DN23924_c0_g1/TRINITY_DN6049_c1_g2/TRINITY_DN1808_c0_g2/TRINITY_DN9506_c0_g1/TRINITY_DN7625_c0_g1/TRINITY_DN8254_c0_g1/TRINITY_DN41254_c0_g1/TRINITY_DN13785_c0_g1/TRINITY_DN365_c5_g1/TRINITY_DN1580_c0_g1/TRINITY_DN8848_c0_g1/TRINITY_DN29993_c0_g1/TRINITY_DN5502_c0_g1/TRINITY_DN6436_c2_g2/TRINITY_DN271_c0_g1/TRINITY_DN1727_c2_g1/TRINITY_DN1808_c0_g3/TRINITY_DN2654_c0_g1/TRINITY_DN17694_c0_g1/TRINI | 39 |
|------------|----------------------|---------|-----------|----------|----------|----------|---------------------------------------------------------------------------------------------------------------------------------------------------------------------------------------------------------------------------------------------------------------------------------------------------------------------------------------------------------------------------------------------------------------------------------------------------------------------------------------------------------------------------------------------------------------------------------------------------------------------------------------------------------------------------------------------------------------------------------------------------------------------------------------------------------------------|----|

|            |                                  |         |          |          |          |          |                                                                                                                                                                                                                                                                                                                                                                                                                                                                                                          |    |
|------------|----------------------------------|---------|----------|----------|----------|----------|----------------------------------------------------------------------------------------------------------------------------------------------------------------------------------------------------------------------------------------------------------------------------------------------------------------------------------------------------------------------------------------------------------------------------------------------------------------------------------------------------------|----|
| GO:0044255 | cellular lipid metabolic process | 8/2626  | 35/33142 | 0.005207 | 0.030748 | 0.023022 | TY_DN9780_c0_g1/TRINITY_DN4859_c0_g1/TRINITY_DN1888_c1_g1/TRINITY_DN1517_c0_g1/TRINITY_DN11473_c0_g1/TRINITY_DN608_c0_g1/TRINITY_DN3559_c0_g1/TRINITY_DN15536_c0_g1/TRINITY_DN9703_c0_g1/TRINITY_DN80403_c0_g1/TRINITY_DN10720_c0_g1/TRINITY_DN12441_c0_g1/TRINITY_DN23860_c0_g1/TRINITY_DN10344_c0_g1/TRINITY_DN20231_c0_g1/TRINITY_DN6455_c0_g1/TRINITY_DN77269_c0_g1/TRINITY_DN21814_c0_g2/TRINITY_DN23263_c0_g1/TRINITY_DN4485_c0_g1/TRINITY_DN2168_c4_g1/TRINITY_DN5833_c0_g1/TRINITY_DN16751_c0_g1 | 8  |
| GO:0005901 | caveola                          | 7/2626  | 28/33142 | 0.005217 | 0.030748 | 0.023022 | TRINITY_DN5364_c0_g1/TRINITY_DN5086_c0_g1/TRINITY_DN200_c0_g2/TRINITY_DN233_c0_g1/TRINITY_DN19100_c0_g1/TRINITY_DN333_c0_g1/TRINITY_DN5922_c0_g1/TRINITY_DN6327_c1_g1/TRINITY_DN9767_c0_g3/TRINITY_DN2476_c1_g1/TRINITY_DN6947_c0_g1/TRINITY_DN18321_c0_g1/TRINITY_DN37845                                                                                                                                                                                                                               | 7  |
| GO:0042981 | regulation of apoptotic process  | 12/2626 | 66/33142 | 0.005268 | 0.030982 | 0.023197 |                                                                                                                                                                                                                                                                                                                                                                                                                                                                                                          | 12 |

|            |                                                     |        |          |          |          |          |                                                                                                                                      |   |
|------------|-----------------------------------------------------|--------|----------|----------|----------|----------|--------------------------------------------------------------------------------------------------------------------------------------|---|
|            |                                                     |        |          |          |          |          | _c0_g1/TRINITY_DN1797_c0_g1/TRINITY_DN8625_c0_g1/TRINITY_DN1699_c1_g1/TRINITY_DN6643_c0_g1/TRINITY_DN4839_c0_g1/TRINITY_DN6505_c0_g1 |   |
| GO:0001894 | tissue homeostasis                                  | 4/2626 | 10/33142 | 0.005595 | 0.032105 | 0.024038 | TRINITY_DN658_c0_g1/TRINITY_DN9281_c0_g1/TRINITY_DN1267_c0_g2/TRINITY_DN1178_c2_g1                                                   | 4 |
| GO:0003091 | renal water homeostasis                             | 4/2626 | 10/33142 | 0.005595 | 0.032105 | 0.024038 | TRINITY_DN658_c0_g1/TRINITY_DN17778_c0_g1/TRINITY_DN20653_c0_g1/TRINITY_DN6839_c2_g1                                                 | 4 |
| GO:0003990 | acetylcholinesterase activity                       | 4/2626 | 10/33142 | 0.005595 | 0.032105 | 0.024038 | TRINITY_DN13673_c0_g1/TRINITY_DN9375_c0_g1/TRINITY_DN2207_c0_g1/TRINITY_DN1133_c1_g2                                                 | 4 |
| GO:0004114 | 3', 5'-cyclic-nucleotide phosphodiesterase activity | 4/2626 | 10/33142 | 0.005595 | 0.032105 | 0.024038 | TRINITY_DN5339_c0_g1/TRINITY_DN4899_c1_g1/TRINITY_DN5951_c0_g4/TRINITY_DN10344_c0_g1                                                 | 4 |
| GO:0004613 | phosphoenolpyruvate carboxykinase (GTP) activity    | 4/2626 | 10/33142 | 0.005595 | 0.032105 | 0.024038 | TRINITY_DN1015_c0_g2/TRINITY_DN2378_c0_g1/TRINITY_DN1015_c0_g3/TRINITY_DN8848_c0_g1                                                  | 4 |
| GO:0032780 | negative regulation of ATPase activity              | 4/2626 | 10/33142 | 0.005595 | 0.032105 | 0.024038 | TRINITY_DN7684_c0_g1/TRINITY_DN30262_c0_g1/TRINITY_DN11189_c0_g1/TRINITY_DN3574_c0_g1                                                | 4 |
| GO:0040040 | thermosensory behavior                              | 4/2626 | 10/33142 | 0.005595 | 0.032105 | 0.024038 | TRINITY_DN161_c0_g1/TRINITY_DN7807_c0_g1/TRINITY_DN                                                                                  | 4 |





|            |                                                |         |          |          |          |          |                                                                                                                                                                                                 |    |
|------------|------------------------------------------------|---------|----------|----------|----------|----------|-------------------------------------------------------------------------------------------------------------------------------------------------------------------------------------------------|----|
| GO:0043325 | phosphatidylinositol-3, 4-bisphosphate binding | 4/2626  | 10/33142 | 0.005595 | 0.032105 | 0.024038 | DN18321_c0_g1/TRINITY_DN4784_c1_g1<br>TRINITY_DN19161_c0_g1/TRINITY_DN2629_c0_g1/TRINITY_DN8977_c0_g1/TRINITY_DN6505_c0_g1                                                                      | 4  |
| GO:0048060 | negative gravitaxis                            | 4/2626  | 10/33142 | 0.005595 | 0.032105 | 0.024038 | TRINITY_DN6597_c0_g1/TRINITY_DN8167_c0_g1/TRINITY_DN11596_c0_g1/TRINITY_DN4522_c0_g1                                                                                                            | 4  |
| GO:0048067 | cuticle pigmentation                           | 4/2626  | 10/33142 | 0.005595 | 0.032105 | 0.024038 | TRINITY_DN8260_c0_g2/TRINITY_DN7807_c0_g1/TRINITY_DN855_c0_g1/TRINITY_DN4947_c0_g1                                                                                                              | 4  |
| GO:0048839 | inner ear development                          | 4/2626  | 10/33142 | 0.005595 | 0.032105 | 0.024038 | TRINITY_DN6174_c0_g1/TRINITY_DN47_c0_g1/TRINITY_DN16407_c1_g1/TRINITY_DN1541_c0_g1                                                                                                              | 4  |
| GO:0050905 | neuromuscular process                          | 4/2626  | 10/33142 | 0.005595 | 0.032105 | 0.024038 | TRINITY_DN16600_c0_g1/TRINITY_DN1267_c0_g2/TRINITY_DN16751_c0_g1/TRINITY_DN579_c0_g1                                                                                                            | 4  |
| GO:0004180 | carboxypeptidase activity                      | 9/2626  | 43/33142 | 0.005794 | 0.033177 | 0.024841 | TRINITY_DN3991_c0_g1/TRINITY_DN16579_c1_g1/TRINITY_DN2682_c0_g1/TRINITY_DN3991_c0_g2/TRINITY_DN1773_c1_g2/TRINITY_DN9651_c0_g1/TRINITY_DN13564_c0_g1/TRINITY_DN4541_c0_g1/TRINITY_DN11117_c1_g1 | 9  |
| GO:0006954 | inflammatory response                          | 10/2626 | 51/33142 | 0.006057 | 0.034484 | 0.025819 | TRINITY_DN6931_c0_g1/TRINITY_DN22536_c0_g1/TRINITY_DN11117_c1_g1                                                                                                                                | 10 |

|            |                                 |        |          |          |          |          |                                                                                                                                                                                                                                                                                               |   |
|------------|---------------------------------|--------|----------|----------|----------|----------|-----------------------------------------------------------------------------------------------------------------------------------------------------------------------------------------------------------------------------------------------------------------------------------------------|---|
| GO:0009166 | nucleotide catabolic process    | 6/2626 | 22/33142 | 0.006059 | 0.034484 | 0.025819 | TY_DN10890_c0_g1/TRINITY_DN3120_c0_g1/TRINITY_DN755_c1_g1/TRINITY_DN271_c0_g1/TRINITY_DN2292_c2_g1/TRINITY_DN489_c1_g1/TRINITY_DN5431_c0_g1/TRINITY_DN5031_c0_g1/TRINITY_DN24800_c0_g1/TRINITY_DN9314_c0_g1/TRINITY_DN434_c0_g1/TRINITY_DN595_c0_g3/TRINITY_DN9430_c1_g1/TRINITY_DN2810_c0_g2 | 6 |
| GO:0042043 | neurexin family protein binding | 6/2626 | 22/33142 | 0.006059 | 0.034484 | 0.025819 | TRINITY_DN9375_c0_g1/TRINITY_DN15308_c0_g2/TRINITY_DN17565_c0_g1/TRINITY_DN7687_c0_g1/TRINITY_DN5274_c0_g1/TRINITY_DN7523_c0_g1                                                                                                                                                               | 6 |
| GO:0019730 | antimicrobial humoral response  | 7/2626 | 29/33142 | 0.006415 | 0.0359   | 0.026879 | TRINITY_DN2476_c1_g1/TRINITY_DN2133_c0_g1/TRINITY_DN5173_c0_g1/TRINITY_DN1338_c0_g1/TRINITY_DN3284_c0_g1/TRINITY_DN68176_c0_g1/TRINITY_DN25627_c0_g1                                                                                                                                          | 7 |
| GO:0045165 | cell fate commitment            | 7/2626 | 29/33142 | 0.006415 | 0.0359   | 0.026879 | TRINITY_DN1893_c0_g1/TRINITY_DN1557_c0_g1/TRINITY_DN5239_c1_g2/TRINITY_DN2778_c0_g3/TRINITY_DN419_c0_g2/TRINITY_DN23750_c                                                                                                                                                                     | 7 |

|            |                                                |        |          |          |        |          |                                                                                                                                                                                                                                                                                                                                                                                                                                                                                                                                                                                                                                                                                                                                       |   |
|------------|------------------------------------------------|--------|----------|----------|--------|----------|---------------------------------------------------------------------------------------------------------------------------------------------------------------------------------------------------------------------------------------------------------------------------------------------------------------------------------------------------------------------------------------------------------------------------------------------------------------------------------------------------------------------------------------------------------------------------------------------------------------------------------------------------------------------------------------------------------------------------------------|---|
| GO:0051491 | positive regulation of filopodium assembly     | 7/2626 | 29/33142 | 0.006415 | 0.0359 | 0.026879 | 0_g1/TRINITY_DN77356_c0_g1<br>TRINITY_DN2489_c0_g1/TRINITY_DN2738_c0_g1/TRINITY_DN10760_c0_g1/TRINITY_DN740_c0_g1/TRINITY_DN5459_c0_g1/TRINITY_DN2598_c0_g2/TRINITY_DN7687_c0_g1<br>TRINITY_DN1015_c0_g2/TRINITY_DN2378_c0_g1/TRINITY_DN8848_c0_g1/TRINITY_DN11938_c0_g1/TRINITY_DN40503_c0_g1/TRINITY_DN4641_c0_g1/TRINITY_DN7471_c0_g1<br>TRINITY_DN7437_c0_g1/TRINITY_DN11100_c0_g1/TRINITY_DN85_c0_g1/TRINITY_DN9158_c3_g1/TRINITY_DN709_c0_g1<br>TRINITY_DN1709_c0_g1/TRINITY_DN27259_c0_g1/TRINITY_DN5199_c0_g1/TRINITY_DN6690_c1_g1/TRINITY_DN4674_c0_g1<br>TRINITY_DN7953_c1_g1/TRINITY_DN154_c0_g1/TRINITY_DN18321_c0_g1/TRINITY_DN29974_c0_g1/TRINITY_DN27661_c0_g1<br>TRINITY_DN8258_c0_g1/TRINITY_DN4523_c0_g1/TRINITY_DN | 7 |
| GO:0071333 | cellular response to glucose stimulus          | 7/2626 | 29/33142 | 0.006415 | 0.0359 | 0.026879 | TRINITY_DN11938_c0_g1/TRINITY_DN40503_c0_g1/TRINITY_DN4641_c0_g1/TRINITY_DN7471_c0_g1<br>TRINITY_DN7437_c0_g1/TRINITY_DN11100_c0_g1/TRINITY_DN85_c0_g1/TRINITY_DN9158_c3_g1/TRINITY_DN709_c0_g1<br>TRINITY_DN1709_c0_g1/TRINITY_DN27259_c0_g1/TRINITY_DN5199_c0_g1/TRINITY_DN6690_c1_g1/TRINITY_DN4674_c0_g1<br>TRINITY_DN7953_c1_g1/TRINITY_DN154_c0_g1/TRINITY_DN18321_c0_g1/TRINITY_DN29974_c0_g1/TRINITY_DN27661_c0_g1<br>TRINITY_DN8258_c0_g1/TRINITY_DN4523_c0_g1/TRINITY_DN                                                                                                                                                                                                                                                    | 7 |
| GO:0003148 | outflow tract septum morphogenesis             | 5/2626 | 16/33142 | 0.006473 | 0.0359 | 0.026879 | TRINITY_DN11938_c0_g1/TRINITY_DN40503_c0_g1/TRINITY_DN4641_c0_g1/TRINITY_DN7471_c0_g1<br>TRINITY_DN7437_c0_g1/TRINITY_DN11100_c0_g1/TRINITY_DN85_c0_g1/TRINITY_DN9158_c3_g1/TRINITY_DN709_c0_g1<br>TRINITY_DN1709_c0_g1/TRINITY_DN27259_c0_g1/TRINITY_DN5199_c0_g1/TRINITY_DN6690_c1_g1/TRINITY_DN4674_c0_g1<br>TRINITY_DN7953_c1_g1/TRINITY_DN154_c0_g1/TRINITY_DN18321_c0_g1/TRINITY_DN29974_c0_g1/TRINITY_DN27661_c0_g1<br>TRINITY_DN8258_c0_g1/TRINITY_DN4523_c0_g1/TRINITY_DN                                                                                                                                                                                                                                                    | 5 |
| GO:0005313 | L-glutamate transmembrane transporter activity | 5/2626 | 16/33142 | 0.006473 | 0.0359 | 0.026879 | TRINITY_DN11938_c0_g1/TRINITY_DN40503_c0_g1/TRINITY_DN4641_c0_g1/TRINITY_DN7471_c0_g1<br>TRINITY_DN7437_c0_g1/TRINITY_DN11100_c0_g1/TRINITY_DN85_c0_g1/TRINITY_DN9158_c3_g1/TRINITY_DN709_c0_g1<br>TRINITY_DN1709_c0_g1/TRINITY_DN27259_c0_g1/TRINITY_DN5199_c0_g1/TRINITY_DN6690_c1_g1/TRINITY_DN4674_c0_g1<br>TRINITY_DN7953_c1_g1/TRINITY_DN154_c0_g1/TRINITY_DN18321_c0_g1/TRINITY_DN29974_c0_g1/TRINITY_DN27661_c0_g1<br>TRINITY_DN8258_c0_g1/TRINITY_DN4523_c0_g1/TRINITY_DN                                                                                                                                                                                                                                                    | 5 |
| GO:0007622 | rhythmic behavior                              | 5/2626 | 16/33142 | 0.006473 | 0.0359 | 0.026879 | TRINITY_DN11938_c0_g1/TRINITY_DN40503_c0_g1/TRINITY_DN4641_c0_g1/TRINITY_DN7471_c0_g1<br>TRINITY_DN7437_c0_g1/TRINITY_DN11100_c0_g1/TRINITY_DN85_c0_g1/TRINITY_DN9158_c3_g1/TRINITY_DN709_c0_g1<br>TRINITY_DN1709_c0_g1/TRINITY_DN27259_c0_g1/TRINITY_DN5199_c0_g1/TRINITY_DN6690_c1_g1/TRINITY_DN4674_c0_g1<br>TRINITY_DN7953_c1_g1/TRINITY_DN154_c0_g1/TRINITY_DN18321_c0_g1/TRINITY_DN29974_c0_g1/TRINITY_DN27661_c0_g1<br>TRINITY_DN8258_c0_g1/TRINITY_DN4523_c0_g1/TRINITY_DN                                                                                                                                                                                                                                                    | 5 |
| GO:0015718 | monocarboxylic acid transport                  | 5/2626 | 16/33142 | 0.006473 | 0.0359 | 0.026879 | TRINITY_DN11938_c0_g1/TRINITY_DN40503_c0_g1/TRINITY_DN4641_c0_g1/TRINITY_DN7471_c0_g1<br>TRINITY_DN7437_c0_g1/TRINITY_DN11100_c0_g1/TRINITY_DN85_c0_g1/TRINITY_DN9158_c3_g1/TRINITY_DN709_c0_g1<br>TRINITY_DN1709_c0_g1/TRINITY_DN27259_c0_g1/TRINITY_DN5199_c0_g1/TRINITY_DN6690_c1_g1/TRINITY_DN4674_c0_g1<br>TRINITY_DN7953_c1_g1/TRINITY_DN154_c0_g1/TRINITY_DN18321_c0_g1/TRINITY_DN29974_c0_g1/TRINITY_DN27661_c0_g1<br>TRINITY_DN8258_c0_g1/TRINITY_DN4523_c0_g1/TRINITY_DN                                                                                                                                                                                                                                                    | 5 |

|            |                                                       |         |           |          |         |          |                                                                                                                                                                     |    |
|------------|-------------------------------------------------------|---------|-----------|----------|---------|----------|---------------------------------------------------------------------------------------------------------------------------------------------------------------------|----|
| GO:0016404 | 15-hydroxyprostaglandin dehydrogenase (NAD+) activity | 5/2626  | 16/33142  | 0.006473 | 0.0359  | 0.026879 | Y_DN1659_c1_g2/TRINITY_DN8515_c2_g1/TRINITY_DN1138_c0_g1<br>TRINITY_DN406_c0_g3/TRINITY_DN5049_c0_g1/TRINITY_DN2999_c0_g1/TRINITY_DN406_c0_g2/TRINITY_DN42565_c0_g1 | 5  |
| GO:0030100 | regulation of endocytosis                             | 5/2626  | 16/33142  | 0.006473 | 0.0359  | 0.026879 | TRINITY_DN1633_c0_g1/TRINITY_DN10575_c2_g1/TRINITY_DN6505_c0_g1/TRINITY_DN17100_c0_g1/TRINITY_DN8692_c0_g1                                                          | 5  |
| GO:0030553 | cGMP binding                                          | 5/2626  | 16/33142  | 0.006473 | 0.0359  | 0.026879 | TRINITY_DN2924_c1_g1/TRINITY_DN5951_c0_g4/TRINITY_DN4264_c1_g1/TRINITY_DN4784_c1_g1/TRINITY_DN10344_c0_g1                                                           | 5  |
| GO:0031463 | Cul3-RING ubiquitin ligase complex                    | 5/2626  | 16/33142  | 0.006473 | 0.0359  | 0.026879 | TRINITY_DN16186_c0_g1/TRINITY_DN11676_c0_g1/TRINITY_DN13467_c0_g1/TRINITY_DN50069_c0_g1/TRINITY_DN2331_c0_g1                                                        | 5  |
| GO:0043052 | thermotaxis                                           | 5/2626  | 16/33142  | 0.006473 | 0.0359  | 0.026879 | TRINITY_DN161_c0_g1/TRINITY_DN7807_c0_g1/TRINITY_DN6805_c0_g1/TRINITY_DN2094_c0_g1/TRINITY_DN4784_c1_g1                                                             | 5  |
| GO:0004523 | RNA-DNA hybrid ribonuclease activity                  | 16/2626 | 103/33142 | 0.007037 | 0.03895 | 0.029163 | TRINITY_DN1830_c0_g2/TRINITY_DN180_c0_g2/TRINITY_DN1070_c0_g3/TRINITY_DN103_c0_g1/TRINITY_DN6397_c0_g1                                                              | 16 |

|            |                                      |        |          |          |          |          |                                                                                                                                                                                                                                                                                                                                                                                                                                                                                                                                                                                                            |   |
|------------|--------------------------------------|--------|----------|----------|----------|----------|------------------------------------------------------------------------------------------------------------------------------------------------------------------------------------------------------------------------------------------------------------------------------------------------------------------------------------------------------------------------------------------------------------------------------------------------------------------------------------------------------------------------------------------------------------------------------------------------------------|---|
| GO:0010025 | wax biosynthetic process             | 8/2626 | 37/33142 | 0.007418 | 0.040819 | 0.030563 | c2_g1/TRINITY_DN27616_c1_g1/TRINITY_DN23001_c0_g3/TRINITY_DN1252_c0_g1/TRINITY_DN24885_c0_g1/TRINITY_DN60975_c0_g1/TRINITY_DN7464_c1_g1/TRINITY_DN30055_c0_g1/TRINITY_DN392_c2_g1/TRINITY_DN12254_c0_g3/TRINITY_DN1589_c5_g1/TRINITY_DN13245_c0_g1/TRINITY_DN2997_c0_g1/TRINITY_DN8066_c0_g1/TRINITY_DN57502_c0_g1/TRINITY_DN11631_c0_g3/TRINITY_DN3305_c0_g1/TRINITY_DN6810_c0_g1/TRINITY_DN1450_c0_g3/TRINITY_DN18007_c0_g1/TRINITY_DN2639_c0_g1/TRINITY_DN77781_c0_g1/TRINITY_DN20439_c0_g1/TRINITY_DN10890_c0_g1/TRINITY_DN60483_c1_g1/TRINITY_DN5519_c0_g1/TRINITY_DN3180_c0_g1/TRINITY_DN77356_c0_g1 | 8 |
| GO:0035206 | regulation of hemocyte proliferation | 8/2626 | 37/33142 | 0.007418 | 0.040819 | 0.030563 | TRINITY_DN11750_c0_g1/TRINITY_DN4514_c0_g1/TRINITY_DN7743_c0_g1/TRINITY_DN2629_c0_g1/TRINITY_DN14877_c1_g1/TRINITY_DN954_c0_g1/TRINITY_DN6189_c1_g2/TRINITY_DN3238_c0_g1                                                                                                                                                                                                                                                                                                                                                                                                                                   | 8 |
| GO:0060548 | negative regulation of cell death    | 8/2626 | 37/33142 | 0.007418 | 0.040819 | 0.030563 |                                                                                                                                                                                                                                                                                                                                                                                                                                                                                                                                                                                                            | 8 |

|            |                                        |         |           |          |          |          |                                                                                                                                                                                                                                                                                                                                                                                                                                                            |    |
|------------|----------------------------------------|---------|-----------|----------|----------|----------|------------------------------------------------------------------------------------------------------------------------------------------------------------------------------------------------------------------------------------------------------------------------------------------------------------------------------------------------------------------------------------------------------------------------------------------------------------|----|
| GO:0010628 | positive regulation of gene expression | 21/2626 | 150/33142 | 0.007652 | 0.041968 | 0.031423 | TRINITY_DN1893_c0_g1/TRINITY_DN1691_c0_g2/TRINITY_DN4783_c0_g1/TRINITY_DN439_c0_g1/TRINITY_DN3120_c0_g1/TRINITY_DN402_c1_g1/TRINITY_DN1908_c3_g1/TRINITY_DN8903_c0_g1/TRINITY_DN18321_c0_g1/TRINITY_DN9281_c0_g1/TRINITY_DN15112_c0_g1/TRINITY_DN3722_c0_g1/TRINITY_DN2746_c0_g1/TRINITY_DN19100_c0_g1/TRINITY_DN9158_c3_g1/TRINITY_DN12127_c0_g1/TRINITY_DN709_c0_g1/TRINITY_DN4326_c0_g1/TRINITY_DN4481_c0_g1/TRINITY_DN4784_c1_g1/TRINITY_DN10344_c0_g1 | 21 |
| GO:0016358 | dendrite development                   | 6/2626  | 23/33142  | 0.007656 | 0.041968 | 0.031423 | TRINITY_DN3245_c0_g1/TRINITY_DN2244_c1_g1/TRINITY_DN43399_c0_g1/TRINITY_DN27045_c0_g1/TRINITY_DN446_c1_g1/TRINITY_DN1186_c0_g1                                                                                                                                                                                                                                                                                                                             | 6  |
| GO:0004725 | protein tyrosine phosphatase activity  | 11/2626 | 61/33142  | 0.007868 | 0.042964 | 0.032169 | TRINITY_DN3655_c4_g1/TRINITY_DN6775_c0_g2/TRINITY_DN3296_c0_g1/TRINITY_DN3417_c0_g1/TRINITY_DN51821_c0_g1/TRINITY_DN645_c0_g1/TRINITY_DN443_c0_g1/TRINITY_DN6775_c0_g1/TRI                                                                                                                                                                                                                                                                                 | 11 |



|            |                               |         |          |          |          |          |                                                                                                                                                                                                                                                                                                                                                                                                                                                                                                                                                                                                                                                                                                                               |    |
|------------|-------------------------------|---------|----------|----------|----------|----------|-------------------------------------------------------------------------------------------------------------------------------------------------------------------------------------------------------------------------------------------------------------------------------------------------------------------------------------------------------------------------------------------------------------------------------------------------------------------------------------------------------------------------------------------------------------------------------------------------------------------------------------------------------------------------------------------------------------------------------|----|
| GO:0016209 | antioxidant activity          | 11/2626 | 61/33142 | 0.007868 | 0.042964 | 0.032169 | NITY_DN39318_c0_g1/TRINITY_DN6219_c0_g1/TRINITY_DN10111_c0_g1<br>TRINITY_DN77781_c0_g1/TRINITY_DN9425_c0_g1/TRINITY_DN4836_c0_g1/TRINITY_DN60483_c1_g1/TRINITY_DN7756_c0_g1/TRINITY_DN84_c2_g1/TRINITY_DN271_c0_g1/TRINITY_DN13964_c0_g1/TRINITY_DN346_c0_g1/TRINITY_DN997_c0_g1/TRINITY_DN13697_c0_g1<br>TRINITY_DN10159_c1_g1/TRINITY_DN6641_c0_g2/TRINITY_DN6641_c0_g1/TRINITY_DN5802_c0_g1<br>TRINITY_DN10137_c0_g1/TRINITY_DN12107_c0_g1/TRINITY_DN1610_c0_g1/TRINITY_DN6300_c0_g1<br>TRINITY_DN3991_c0_g1/TRINITY_DN2682_c0_g1/TRINITY_DN3991_c0_g2/TRINITY_DN13564_c0_g1<br>TRINITY_DN256_c0_g1/TRINITY_DN26373_c0_g1/TRINITY_DN31763_c0_g1/TRINITY_DN33745_c0_g1<br>TRINITY_DN11325_c0_g1/TRINITY_DN38512_c0_g1/TRINI | 11 |
| GO:0007370 | ventral furrow formation      | 4/2626  | 11/33142 | 0.008246 | 0.043755 | 0.032761 |                                                                                                                                                                                                                                                                                                                                                                                                                                                                                                                                                                                                                                                                                                                               | 4  |
| GO:0007588 | excretion                     | 4/2626  | 11/33142 | 0.008246 | 0.043755 | 0.032761 |                                                                                                                                                                                                                                                                                                                                                                                                                                                                                                                                                                                                                                                                                                                               | 4  |
| GO:0008241 | peptidyl-dipeptidase activity | 4/2626  | 11/33142 | 0.008246 | 0.043755 | 0.032761 |                                                                                                                                                                                                                                                                                                                                                                                                                                                                                                                                                                                                                                                                                                                               | 4  |
| GO:0016486 | peptide hormone processing    | 4/2626  | 11/33142 | 0.008246 | 0.043755 | 0.032761 |                                                                                                                                                                                                                                                                                                                                                                                                                                                                                                                                                                                                                                                                                                                               | 4  |
| GO:0030695 | GTPase regulator activity     | 4/2626  | 11/33142 | 0.008246 | 0.043755 | 0.032761 |                                                                                                                                                                                                                                                                                                                                                                                                                                                                                                                                                                                                                                                                                                                               | 4  |



|            |                                                   |        |          |          |          |          |                                                                                       |   |
|------------|---------------------------------------------------|--------|----------|----------|----------|----------|---------------------------------------------------------------------------------------|---|
| GO:0032536 | regulation of cell projection size                | 4/2626 | 11/33142 | 0.008246 | 0.043755 | 0.032761 | TY_DN8297_c0_g1/TRINITY_DN38306_c0_g1                                                 | 4 |
| GO:0033700 | phospholipid efflux                               | 4/2626 | 11/33142 | 0.008246 | 0.043755 | 0.032761 | TRINITY_DN8323_c0_g1/TRINITY_DN3446_c0_g1/TRINITY_DN13394_c0_g1/TRINITY_DN8012_c0_g1  | 4 |
| GO:0036019 | endolysosome                                      | 4/2626 | 11/33142 | 0.008246 | 0.043755 | 0.032761 | TRINITY_DN7048_c0_g1/TRINITY_DN10757_c0_g1/TRINITY_DN7045_c1_g1/TRINITY_DN38748_c0_g1 | 4 |
| GO:0043083 | synaptic cleft                                    | 4/2626 | 11/33142 | 0.008246 | 0.043755 | 0.032761 | TRINITY_DN8323_c0_g1/TRINITY_DN3446_c0_g1/TRINITY_DN13394_c0_g1/TRINITY_DN8012_c0_g1  | 4 |
| GO:0048542 | lymph gland development                           | 4/2626 | 11/33142 | 0.008246 | 0.043755 | 0.032761 | TRINITY_DN2738_c0_g1/TRINITY_DN740_c0_g1/TRINITY_DN2598_c0_g2/TRINITY_DN2281_c0_g1    | 4 |
| GO:0050062 | long-chain-fatty-acyl-CoA reductase activity      | 4/2626 | 11/33142 | 0.008246 | 0.043755 | 0.032761 | TRINITY_DN3284_c0_g1/TRINITY_DN19401_c0_g1/TRINITY_DN339_c0_g2/TRINITY_DN14168_c0_g2  | 4 |
| GO:0051898 | negative regulation of protein kinase B signaling | 4/2626 | 11/33142 | 0.008246 | 0.043755 | 0.032761 | TRINITY_DN11631_c0_g3/TRINITY_DN3305_c0_g1/TRINITY_DN6810_c0_g1/TRINITY_DN18007_c0_g1 | 4 |
| GO:0060179 | male mating behavior                              | 4/2626 | 11/33142 | 0.008246 | 0.043755 | 0.032761 | TRINITY_DN93_c0_g1/TRINITY_DN22905_c0_g1/TRINITY_DN56840_c0_g1/TRINITY_DN7084_c0_g1   | 4 |
|            |                                                   |        |          |          |          |          | TRINITY_DN2677_c0_g1/TRINITY_DN9643_c0_g1/TRINITY_DN8297_c0_g1/TRINITY_DN38306_c0_g1  |   |



|            |                                                       |        |          |          |          |          |                                                                                                                              |   |
|------------|-------------------------------------------------------|--------|----------|----------|----------|----------|------------------------------------------------------------------------------------------------------------------------------|---|
| GO:0060395 | SMAD protein signal transduction                      | 4/2626 | 11/33142 | 0.008246 | 0.043755 | 0.032761 | Y_DN5339_c0_g1/TRINITY_DN12402_c0_g1<br>TRINITY_DN1695_c0_g1/TRINITY_DN9767_c0_g3/TRINITY_DN37845_c0_g1/TRINITY_DN7084_c0_g1 | 4 |
| GO:0070840 | dynein complex binding                                | 4/2626 | 11/33142 | 0.008246 | 0.043755 | 0.032761 | TRINITY_DN16186_c0_g1/TRINITY_DN233_c0_g1/TRINITY_DN1633_c0_g1/TRINITY_DN5914_c0_g1                                          | 4 |
| GO:0003941 | L-serine ammonia-lyase activity                       | 5/2626 | 17/33142 | 0.00858  | 0.044936 | 0.033645 | TRINITY_DN10554_c0_g2/TRINITY_DN10867_c0_g1/TRINITY_DN291_c1_g1/TRINITY_DN3638_c0_g1/TRINITY_DN17288_c0_g1                   | 5 |
| GO:0007041 | lysosomal transport                                   | 5/2626 | 17/33142 | 0.00858  | 0.044936 | 0.033645 | TRINITY_DN72971_c0_g1/TRINITY_DN5278_c0_g1/TRINITY_DN4826_c1_g1/TRINITY_DN3354_c0_g1/TRINITY_DN43641_c0_g1                   | 5 |
| GO:0007472 | wing disc morphogenesis                               | 5/2626 | 17/33142 | 0.00858  | 0.044936 | 0.033645 | TRINITY_DN39639_c3_g1/TRINITY_DN7582_c0_g1/TRINITY_DN9642_c1_g2/TRINITY_DN864_c0_g3/TRINITY_DN17100_c0_g1                    | 5 |
| GO:0008559 | xenobiotic transmembrane transporting ATPase activity | 5/2626 | 17/33142 | 0.00858  | 0.044936 | 0.033645 | TRINITY_DN4514_c0_g1/TRINITY_DN14877_c1_g1/TRINITY_DN1216_c2_g1/TRINITY_DN23353_c2_g1/TRINITY_DN5370_c0_g1                   | 5 |
| GO:0017105 | acyl-CoA delta11-desaturase activity                  | 5/2626 | 17/33142 | 0.00858  | 0.044936 | 0.033645 | TRINITY_DN28084_c0_g1/TRINITY_DN6435_c0_g3/TRINITY_DN                                                                        | 5 |

|            |                                          |         |           |          |          |          |                                                                                                                                                                                                                                                                                                                                                                                                                                                                                                                                                                                                                                                                                                                                                                               |    |
|------------|------------------------------------------|---------|-----------|----------|----------|----------|-------------------------------------------------------------------------------------------------------------------------------------------------------------------------------------------------------------------------------------------------------------------------------------------------------------------------------------------------------------------------------------------------------------------------------------------------------------------------------------------------------------------------------------------------------------------------------------------------------------------------------------------------------------------------------------------------------------------------------------------------------------------------------|----|
| GO:0032367 | intracellular cholesterol transport      | 5/2626  | 17/33142  | 0.00858  | 0.044936 | 0.033645 | Y_DN9779_c0_g1/TRINITY_DN5693_c0_g2/TRINITY_DN12549_c0_g1<br>TRINITY_DN6638_c3_g1/TRINITY_DN7048_c0_g1/TRINITY_DN5278_c0_g1/TRINITY_DN10757_c0_g1/TRINITY_DN38748_c0_g1<br>TRINITY_DN10760_c0_g1/TRINITY_DN4326_c0_g1/TRINITY_DN39318_c0_g1/TRINITY_DN6219_c0_g1/TRINITY_DN52030_c0_g1<br>TRINITY_DN9170_c1_g1/TRINITY_DN7953_c1_g1/TRINITY_DN7807_c0_g1/TRINITY_DN419_c0_g2/TRINITY_DN11596_c0_g1/TRINITY_DN16530_c0_g1/TRINITY_DN6409_c3_g1/TRINITY_DN27661_c0_g1<br>TRINITY_DN2516_c0_g1/TRINITY_DN16186_c0_g1/TRINITY_DN2477_c0_g1/TRINITY_DN16937_c0_g2/TRINITY_DN11204_c0_g1/TRINITY_DN226_c0_g3/TRINITY_DN5675_c0_g1/TRINITY_DN33814_c0_g1/TRINITY_DN13766_c0_g1<br>TRINITY_DN658_c0_g1/TRINITY_DN1487_c0_g2/TRINITY_DN1557_c0_g1/TRINITY_DN5239_c1_g2/TRINITY_DN2476_ | 5  |
| GO:0071345 | cellular response to cytokine stimulus   | 5/2626  | 17/33142  | 0.00858  | 0.044936 | 0.033645 | Y_DN9779_c0_g1/TRINITY_DN5693_c0_g2/TRINITY_DN12549_c0_g1<br>TRINITY_DN6638_c3_g1/TRINITY_DN7048_c0_g1/TRINITY_DN5278_c0_g1/TRINITY_DN10757_c0_g1/TRINITY_DN38748_c0_g1<br>TRINITY_DN10760_c0_g1/TRINITY_DN4326_c0_g1/TRINITY_DN39318_c0_g1/TRINITY_DN6219_c0_g1/TRINITY_DN52030_c0_g1<br>TRINITY_DN9170_c1_g1/TRINITY_DN7953_c1_g1/TRINITY_DN7807_c0_g1/TRINITY_DN419_c0_g2/TRINITY_DN11596_c0_g1/TRINITY_DN16530_c0_g1/TRINITY_DN6409_c3_g1/TRINITY_DN27661_c0_g1<br>TRINITY_DN2516_c0_g1/TRINITY_DN16186_c0_g1/TRINITY_DN2477_c0_g1/TRINITY_DN16937_c0_g2/TRINITY_DN11204_c0_g1/TRINITY_DN226_c0_g3/TRINITY_DN5675_c0_g1/TRINITY_DN33814_c0_g1/TRINITY_DN13766_c0_g1<br>TRINITY_DN658_c0_g1/TRINITY_DN1487_c0_g2/TRINITY_DN1557_c0_g1/TRINITY_DN5239_c1_g2/TRINITY_DN2476_ | 5  |
| GO:0008049 | male courtship behavior                  | 8/2626  | 38/33142  | 0.008757 | 0.045779 | 0.034277 | Y_DN9779_c0_g1/TRINITY_DN5693_c0_g2/TRINITY_DN12549_c0_g1<br>TRINITY_DN6638_c3_g1/TRINITY_DN7048_c0_g1/TRINITY_DN5278_c0_g1/TRINITY_DN10757_c0_g1/TRINITY_DN38748_c0_g1<br>TRINITY_DN10760_c0_g1/TRINITY_DN4326_c0_g1/TRINITY_DN39318_c0_g1/TRINITY_DN6219_c0_g1/TRINITY_DN52030_c0_g1<br>TRINITY_DN9170_c1_g1/TRINITY_DN7953_c1_g1/TRINITY_DN7807_c0_g1/TRINITY_DN419_c0_g2/TRINITY_DN11596_c0_g1/TRINITY_DN16530_c0_g1/TRINITY_DN6409_c3_g1/TRINITY_DN27661_c0_g1<br>TRINITY_DN2516_c0_g1/TRINITY_DN16186_c0_g1/TRINITY_DN2477_c0_g1/TRINITY_DN16937_c0_g2/TRINITY_DN11204_c0_g1/TRINITY_DN226_c0_g3/TRINITY_DN5675_c0_g1/TRINITY_DN33814_c0_g1/TRINITY_DN13766_c0_g1<br>TRINITY_DN658_c0_g1/TRINITY_DN1487_c0_g2/TRINITY_DN1557_c0_g1/TRINITY_DN5239_c1_g2/TRINITY_DN2476_ | 8  |
| GO:0005811 | lipid droplet                            | 9/2626  | 46/33142  | 0.00914  | 0.047694 | 0.03571  | Y_DN9779_c0_g1/TRINITY_DN5693_c0_g2/TRINITY_DN12549_c0_g1<br>TRINITY_DN6638_c3_g1/TRINITY_DN7048_c0_g1/TRINITY_DN5278_c0_g1/TRINITY_DN10757_c0_g1/TRINITY_DN38748_c0_g1<br>TRINITY_DN10760_c0_g1/TRINITY_DN4326_c0_g1/TRINITY_DN39318_c0_g1/TRINITY_DN6219_c0_g1/TRINITY_DN52030_c0_g1<br>TRINITY_DN9170_c1_g1/TRINITY_DN7953_c1_g1/TRINITY_DN7807_c0_g1/TRINITY_DN419_c0_g2/TRINITY_DN11596_c0_g1/TRINITY_DN16530_c0_g1/TRINITY_DN6409_c3_g1/TRINITY_DN27661_c0_g1<br>TRINITY_DN2516_c0_g1/TRINITY_DN16186_c0_g1/TRINITY_DN2477_c0_g1/TRINITY_DN16937_c0_g2/TRINITY_DN11204_c0_g1/TRINITY_DN226_c0_g3/TRINITY_DN5675_c0_g1/TRINITY_DN33814_c0_g1/TRINITY_DN13766_c0_g1<br>TRINITY_DN658_c0_g1/TRINITY_DN1487_c0_g2/TRINITY_DN1557_c0_g1/TRINITY_DN5239_c1_g2/TRINITY_DN2476_ | 9  |
| GO:0043066 | negative regulation of apoptotic process | 23/2626 | 172/33142 | 0.009388 | 0.048721 | 0.036479 | Y_DN9779_c0_g1/TRINITY_DN5693_c0_g2/TRINITY_DN12549_c0_g1<br>TRINITY_DN6638_c3_g1/TRINITY_DN7048_c0_g1/TRINITY_DN5278_c0_g1/TRINITY_DN10757_c0_g1/TRINITY_DN38748_c0_g1<br>TRINITY_DN10760_c0_g1/TRINITY_DN4326_c0_g1/TRINITY_DN39318_c0_g1/TRINITY_DN6219_c0_g1/TRINITY_DN52030_c0_g1<br>TRINITY_DN9170_c1_g1/TRINITY_DN7953_c1_g1/TRINITY_DN7807_c0_g1/TRINITY_DN419_c0_g2/TRINITY_DN11596_c0_g1/TRINITY_DN16530_c0_g1/TRINITY_DN6409_c3_g1/TRINITY_DN27661_c0_g1<br>TRINITY_DN2516_c0_g1/TRINITY_DN16186_c0_g1/TRINITY_DN2477_c0_g1/TRINITY_DN16937_c0_g2/TRINITY_DN11204_c0_g1/TRINITY_DN226_c0_g3/TRINITY_DN5675_c0_g1/TRINITY_DN33814_c0_g1/TRINITY_DN13766_c0_g1<br>TRINITY_DN658_c0_g1/TRINITY_DN1487_c0_g2/TRINITY_DN1557_c0_g1/TRINITY_DN5239_c1_g2/TRINITY_DN2476_ | 23 |

|            |                                                 |        |          |          |          |          |                                                                                                                                                                                                                                                                                                                                                                                                                                                                                                                                                                                                                                                                                                                                                                                                                                                             |   |
|------------|-------------------------------------------------|--------|----------|----------|----------|----------|-------------------------------------------------------------------------------------------------------------------------------------------------------------------------------------------------------------------------------------------------------------------------------------------------------------------------------------------------------------------------------------------------------------------------------------------------------------------------------------------------------------------------------------------------------------------------------------------------------------------------------------------------------------------------------------------------------------------------------------------------------------------------------------------------------------------------------------------------------------|---|
| GO:0007050 | cell cycle arrest                               | 7/2626 | 31/33142 | 0.009406 | 0.048721 | 0.036479 | c1_g1/TRINITY_DN3732_c0_g1/TRINITY_DN5483_c0_g1/TRINITY_DN10783_c0_g1/TRINITY_DN4441_c3_g1/TRINITY_DN15112_c0_g1/TRINITY_DN1797_c0_g1/TRINITY_DN6136_c0_g1/TRINITY_DN12891_c0_g1/TRINITY_DN271_c0_g1/TRINITY_DN10569_c0_g2/TRINITY_DN93_c0_g1/TRINITY_DN29974_c0_g1/TRINITY_DN40503_c0_g1/TRINITY_DN3238_c0_g1/TRINITY_DN7903_c0_g1/TRINITY_DN4137_c2_g1/TRINITY_DN6505_c0_g1/TRINITY_DN689_c0_g1<br>TRINITY_DN43642_c0_g1/TRINITY_DN1344_c0_g1/TRINITY_DN4329_c1_g1/TRINITY_DN1178_c2_g1/TRINITY_DN19338_c0_g1/TRINITY_DN11156_c0_g5/TRINITY_DN4000_c0_g1<br>TRINITY_DN5032_c1_g1/TRINITY_DN1854_c0_g2/TRINITY_DN7107_c0_g1/TRINITY_DN12176_c0_g1/TRINITY_DN34926_c1_g1/TRINITY_DN13730_c0_g1/TRINITY_DN12338_c0_g1<br>TRINITY_DN11750_c0_g1/TRINITY_DN11100_c0_g1/TRINITY_DN11750_c0_g1/TRINITY_DN11100_c0_g1/TRINITY_DN11750_c0_g1/TRINITY_DN11100_c0_g1 | 7 |
| GO:0030148 | sphingolipid biosynthetic process               | 7/2626 | 31/33142 | 0.009406 | 0.048721 | 0.036479 | TRINITY_DN12176_c0_g1/TRINITY_DN34926_c1_g1/TRINITY_DN13730_c0_g1/TRINITY_DN12338_c0_g1<br>TRINITY_DN11750_c0_g1/TRINITY_DN11100_c0_g1/TRINITY_DN11750_c0_g1/TRINITY_DN11100_c0_g1                                                                                                                                                                                                                                                                                                                                                                                                                                                                                                                                                                                                                                                                          | 7 |
| GO:1990830 | cellular response to leukemia inhibitory factor | 7/2626 | 31/33142 | 0.009406 | 0.048721 | 0.036479 | TRINITY_DN11750_c0_g1/TRINITY_DN11100_c0_g1/TRINITY_DN11750_c0_g1/TRINITY_DN11100_c0_g1                                                                                                                                                                                                                                                                                                                                                                                                                                                                                                                                                                                                                                                                                                                                                                     | 7 |

|            |                                     |        |          |          |          |          |                                                                                                                                                                                                                                                                                                                                                                            |   |
|------------|-------------------------------------|--------|----------|----------|----------|----------|----------------------------------------------------------------------------------------------------------------------------------------------------------------------------------------------------------------------------------------------------------------------------------------------------------------------------------------------------------------------------|---|
| GO:0007229 | integrin-mediated signaling pathway | 6/2626 | 24/33142 | 0.009536 | 0.049214 | 0.036849 | TY_DN2651_c0_g1/TRINITY_DN1440_c0_g2/TRINITY_DN20844_c0_g1/TRINITY_DN922_c0_g1/TRINITY_DN40503_c0_g1<br>TRINITY_DN9277_c0_g1/TRINITY_DN4223_c1_g1/TRINITY_DN6886_c3_g1/TRINITY_DN2331_c0_g1/TRINITY_DN2281_c0_g1/TRINITY_DN13862_c0_g2<br>TRINITY_DN20653_c0_g1/TRINITY_DN13614_c1_g1/TRINITY_DN3665_c0_g1/TRINITY_DN5234_c0_g1/TRINITY_DN6839_c2_g1/TRINITY_DN26727_c0_g1 | 6 |
| GO:0016849 | phosphorus-oxygen lyase activity    | 6/2626 | 24/33142 | 0.009536 | 0.049214 | 0.036849 |                                                                                                                                                                                                                                                                                                                                                                            | 6 |

---

**Table S5.** Enriched GO terms in both groups.

| GO Terms                       | Discription                                                                                           | <i>p</i> Value (C-vs-L)   | <i>p</i> Value (FE-vs-FL) |
|--------------------------------|-------------------------------------------------------------------------------------------------------|---------------------------|---------------------------|
| <b>MF(molecular function)</b>  |                                                                                                       |                           |                           |
| GO:0042302                     | structural constituent of cuticle                                                                     | $8.55828 \times 10^{-7}$  | $3.39188 \times 10^{-29}$ |
| GO:0004252                     | serine-type endopeptidase activity                                                                    | $5.34017 \times 10^{-16}$ | $2.49093 \times 10^{-17}$ |
| GO:0008061                     | chitin binding                                                                                        | 0.000550851               | $1.49938 \times 10^{-8}$  |
| GO:0004806                     | triglyceride lipase activity                                                                          | 0.000792967               | $1.95232 \times 10^{-8}$  |
| GO:0015574                     | trehalose transmembrane transporter activity                                                          | 0.000380213               | $1.15591 \times 10^{-6}$  |
| GO:0003777                     | microtubule motor activity                                                                            | 0.000241447               | $1.8088 \times 10^{-6}$   |
| GO:0005230                     | extracellular ligand-gated ion channel activity                                                       | $2.22376 \times 10^{-5}$  | $1.90692 \times 10^{-6}$  |
| GO:0070330                     | aromatase activity                                                                                    | 0.000142353               | 0.000237917               |
| GO:0030246                     | carbohydrate binding                                                                                  | 0.000192478               | 0.000311039               |
| GO:0102336                     | 3-oxo-arachidoyl-CoA synthase activity                                                                | $7.2823 \times 10^{-5}$   | 0.000655346               |
| GO:0102337                     | 3-oxo-cerotoyl-CoA synthase activity                                                                  | $7.2823 \times 10^{-5}$   | 0.000655346               |
| GO:0102338                     | 3-oxo-lignoceroyl-CoA synthase activity                                                               | $7.2823 \times 10^{-5}$   | 0.000655346               |
| GO:0102756                     | very-long-chain 3-ketoacyl-CoA synthase activity                                                      | $7.2823 \times 10^{-5}$   | 0.000655346               |
| GO:0005549                     | odorant binding                                                                                       | $1.07119 \times 10^{-12}$ | 0.00074255                |
| GO:0016616                     | oxidoreductase activity, acting on the CH-OH group of donors, NAD or NADP as acceptor                 | $1.30622 \times 10^{-5}$  | 0.000848985               |
| GO:0080019                     | fatty-acyl-CoA reductase (alcohol-forming) activity                                                   | $2.0474 \times 10^{-6}$   | 0.001130314               |
| GO:0016705                     | oxidoreductase activity, acting on paired donors, with incorporation or reduction of molecular oxygen | $1.34491 \times 10^{-6}$  | 0.001428051               |
| GO:0050062                     | long-chain-fatty-acyl-CoA reductase activity                                                          | 0.00052776                | 0.008245781               |
| <b>BP (biological process)</b> |                                                                                                       |                           |                           |
| GO:0060285                     | cilium-dependent cell motility                                                                        | $1.58 \times 10^{-7}$     | $9.13 \times 10^{-12}$    |
| GO:0003351                     | epithelial cilium movement                                                                            | $6.52 \times 10^{-9}$     | $2.77 \times 10^{-11}$    |
| GO:0036159                     | inner dynein arm assembly                                                                             | $7.39 \times 10^{-8}$     | $2.20 \times 10^{-9}$     |
| GO:0006811                     | ion transport                                                                                         | $1.19 \times 10^{-6}$     | $3.65 \times 10^{-9}$     |
| GO:0042073                     | intraciliary transport                                                                                | $9.84 \times 10^{-8}$     | $4.12 \times 10^{-9}$     |
| GO:0006030                     | chitin metabolic process                                                                              | $1.61 \times 10^{-5}$     | $4.27 \times 10^{-9}$     |
| GO:0006629                     | lipid metabolic process                                                                               | $9.42 \times 10^{-5}$     | $5.43 \times 10^{-8}$     |
| GO:0060294                     | cilium movement involved in cell motility                                                             | $3.39 \times 10^{-7}$     | $1.68 \times 10^{-7}$     |
| GO:0015771                     | trehalose transport                                                                                   | 0.000586373               | $6.67 \times 10^{-7}$     |
| GO:0007286                     | spermatid development                                                                                 | 0.000499646               | $8.93 \times 10^{-7}$     |
| GO:0006583                     | melanin biosynthetic process from tyrosine                                                            | $4.38 \times 10^{-5}$     | $1.50 \times 10^{-6}$     |
| GO:0008340                     | determination of adult lifespan                                                                       | 0.000306786               | $2.21 \times 10^{-6}$     |
| GO:0008611                     | ether lipid biosynthetic process                                                                      | 0.000428428               | $3.22 \times 10^{-6}$     |
| GO:0007288                     | sperm axoneme assembly                                                                                | $2.82 \times 10^{-9}$     | $5.39 \times 10^{-6}$     |
| GO:0016042                     | lipid catabolic process                                                                               | 0.000169164               | $6.28 \times 10^{-6}$     |
| GO:0018095                     | protein polyglutamylation                                                                             | 0.000151719               | $2.18 \times 10^{-5}$     |
| GO:0007224                     | smoothened signaling pathway                                                                          | $2.10 \times 10^{-5}$     | 0.000202125               |
| GO:0007586                     | digestion                                                                                             | $1.56 \times 10^{-5}$     | 0.000455913               |
| GO:0035002                     | liquid clearance, open tracheal system                                                                | 0.001133494               | 0.000867076               |
| GO:0036158                     | outer dynein arm assembly                                                                             | 0.00129575                | 0.001453549               |
| GO:0035336                     | long-chain fatty-acyl-CoA metabolic process                                                           | $2.05 \times 10^{-6}$     | 0.001845944               |
| GO:0042811                     | pheromone biosynthetic process                                                                        | 0.00052776                | 0.002706005               |
| GO:0006565                     | L-serine catabolic process                                                                            | 0.000818339               | 0.003609235               |
| GO:0010025                     | wax biosynthetic process                                                                              | $3.09 \times 10^{-6}$     | 0.00741777                |
| <b>CC (cellular component)</b> |                                                                                                       |                           |                           |
| GO:0031514                     | motile cilium                                                                                         | $7.02 \times 10^{-17}$    | $3.51 \times 10^{-28}$    |
| GO:0005929                     | cilium                                                                                                | $6.92 \times 10^{-6}$     | $5.67 \times 10^{-27}$    |

---

|            |                                   |                        |                        |
|------------|-----------------------------------|------------------------|------------------------|
| GO:0005930 | axoneme                           | $4.75 \times 10^{-8}$  | $1.16 \times 10^{-15}$ |
| GO:0030992 | intraciliary transport particle B | $1.63 \times 10^{-7}$  | $3.83 \times 10^{-14}$ |
| GO:0036126 | sperm flagellum                   | $5.26 \times 10^{-12}$ | $2.60 \times 10^{-12}$ |
| GO:0031090 | organelle membrane                | $9.55 \times 10^{-7}$  | $1.03 \times 10^{-9}$  |
| GO:0005764 | lysosome                          | 0.000376332            | $5.50 \times 10^{-9}$  |
| GO:0030286 | dynein complex                    | 0.000322986            | $6.95 \times 10^{-9}$  |
| GO:0005858 | axonemal dynein complex           | $2.57 \times 10^{-6}$  | $9.87 \times 10^{-9}$  |
| GO:0036156 | inner dynein arm                  | $1.06 \times 10^{-8}$  | $1.88 \times 10^{-6}$  |
| GO:0001669 | acrosomal vesicle                 | 0.001270588            | $8.13 \times 10^{-5}$  |
| GO:0097546 | ciliary base                      | 0.00085926             | 0.000982076            |

---

**Table S6.** Candidate juvenile hormone (JH) and moulting hormone (ecdysone) expression analysis of C-vs-L group.

| Row.names | baseMean | log2FoldChange | lfcSE    | stat     | pvalue                 | padj                  | C1       | C2       | C3       | L1       | L2       | L3       |
|-----------|----------|----------------|----------|----------|------------------------|-----------------------|----------|----------|----------|----------|----------|----------|
| Dib       | 69.07495 | -2.80984       | 0.430371 | -6.52888 | $6.63 \times 10^{-11}$ | $1.46 \times 10^{-9}$ | 9.201501 | 23.34062 | 20.05101 | 126.69   | 106.7711 | 128.3955 |
| FDP       | 67.25664 | -3.57481       | 0.563691 | -6.3418  | $2.27 \times 10^{-10}$ | $2.50 \times 10^{-9}$ | 14.4595  | 12.56802 | 4.296645 | 48.33261 | 146.8102 | 177.0729 |
| MevPPD    | 27678.14 | 1.402388       | 0.26762  | 5.240227 | $1.60 \times 10^{-7}$  | $1.18 \times 10^{-6}$ | 37847.09 | 49200.23 | 33440.79 | 13749.9  | 12265.32 | 19565.49 |
| FPPP      | 362.5937 | 2.373825       | 0.79085  | 3.001611 | 0.002686               | 0.014771              | 634.9036 | 700.2185 | 488.3853 | 257.7739 | 37.13776 | 57.14304 |
| JHDK      | 669.5392 | 2.86628        | 1.053584 | 2.720503 | 0.006518               | 0.02868               | 1561.626 | 64.63556 | 1906.278 | 382.267  | 25.53221 | 76.89618 |
| HMGR      | 145.9369 | -1.4261        | 0.564404 | -2.52673 | 0.011513               | 0.042214              | 56.52351 | 66.43099 | 114.5772 | 91.53904 | 363.834  | 182.7166 |
| JHE       | 3.307633 | 5.752463       | 2.386864 | 2.41005  | 0.01595                | 0.05013               | 14.4595  | 5.386296 | 0        | 0        | 0        | 0        |
| FPPS      | 2292.896 | -1.29303       | 0.578638 | -2.23461 | 0.025443               | 0.069967              | 1873.163 | 833.0805 | 1280.4   | 2072.444 | 3801.978 | 3896.308 |
| MevK      | 1094.432 | 1.397501       | 0.733558 | 1.905099 | 0.056767               | 0.113534              | 667.7661 | 3429.275 | 663.1155 | 622.4655 | 568.0916 | 615.8749 |
| JHAMT     | 249.2475 | -1.66986       | 0.865514 | -1.92933 | 0.05369                | 0.113534              | 214.2635 | 48.47667 | 94.52619 | 50.52955 | 880.2809 | 207.4081 |
| phm       | 285.2763 | 1.161711       | 0.589188 | 1.971715 | 0.048642               | 0.113534              | 274.7305 | 482.9712 | 425.3679 | 217.4968 | 189.7507 | 121.3408 |
| CYP18A1   | 881.5521 | 1.120999       | 0.772861 | 1.450453 | 0.146932               | 0.269376              | 1318.444 | 1382.483 | 922.3465 | 1200.992 | 329.5976 | 135.4502 |
| MevPK     | 40.74006 | -0.53775       | 0.387036 | -1.38941 | 0.164708               | 0.278736              | 23.661   | 39.49951 | 37.23759 | 39.54487 | 64.99107 | 39.5063  |
| SAD       | 69.33357 | 0.574397       | 0.480183 | 1.196203 | 0.231617               | 0.34206               | 44.69301 | 150.8163 | 54.42417 | 43.20643 | 81.23884 | 41.6227  |
| SHD       | 528.4596 | -1.05432       | 0.88442  | -1.1921  | 0.233222               | 0.34206               | 89.38601 | 141.8391 | 799.176  | 363.2269 | 578.5366 | 1198.593 |
| AACT      | 2532.337 | 0.592295       | 0.619279 | 0.956427 | 0.338856               | 0.414158              | 3315.169 | 2231.722 | 3587.699 | 3623.481 | 961.5197 | 1474.431 |
| IPPI      | 908.1342 | 0.568516       | 0.578912 | 0.982042 | 0.326079               | 0.414158              | 921.4646 | 1515.345 | 817.7948 | 711.0753 | 672.5416 | 810.5845 |
| spook     | 393.9459 | -0.8606        | 0.846078 | -1.01717 | 0.309075               | 0.414158              | 39.435   | 423.722  | 376.6725 | 246.0569 | 676.0232 | 601.7655 |
| Nvd       | 237.1985 | 0.719022       | 0.797314 | 0.901806 | 0.36716                | 0.425132              | 160.369  | 633.7875 | 91.66176 | 44.67105 | 247.1982 | 245.5034 |
| FDH       | 3122.018 | -0.14089       | 0.57313  | -0.24583 | 0.805817               | 0.886399              | 3893.549 | 1504.572 | 3510.359 | 4001.355 | 1870.234 | 3952.041 |
| HMGS      | 305.9354 | -0.06489       | 0.58732  | -0.11049 | 0.912025               | 0.950645              | 210.32   | 380.6316 | 306.494  | 270.9556 | 308.1273 | 359.084  |
| Epoxidase | 3.894594 | -0.0866        | 1.399122 | -0.0619  | 0.950645               | 0.950645              | 6.572501 | 1.795432 | 2.86443  | 5.126186 | 3.481665 | 3.527348 |
| JHEH      | 2216.754 | 1.116502       | 1.033617 | 1.080189 | NA                     | NA                    | 4193.255 | 852.8303 | 4056.033 | 3950.825 | 101.5486 | 146.0322 |

Table S7. Candidate juvenile hormone (JH) and moulting hormone (ecdysone) expression analysis of E-vs-F group.

| Row.names | baseMean | log2FoldChange | lfcSE    | stat     | pvalue                | padj                  | E1       | E2       | E3       | F1       | F2       | F3       |
|-----------|----------|----------------|----------|----------|-----------------------|-----------------------|----------|----------|----------|----------|----------|----------|
| FDP       | 119.6213 | 5.075544       | 0.931899 | 5.446454 | $5.14 \times 10^{-8}$ | $1.18 \times 10^{-6}$ | 5.556407 | 12.40516 | 2.630001 | 138.4645 | 462.0522 | 96.61978 |
| HMGS      | 449.3272 | -1.97046       | 0.376024 | -5.24024 | $1.60 \times 10^{-7}$ | $1.84 \times 10^{-6}$ | 740.8543 | 638.4523 | 767.9604 | 200.8495 | 191.2869 | 156.5598 |
| CYP18A1   | 4067.003 | -4.92171       | 1.043565 | -4.71625 | $2.40 \times 10^{-6}$ | $1.84 \times 10^{-5}$ | 5546.22  | 17214.23 | 861.7638 | 381.9184 | 292.3187 | 105.5661 |
| JHDK      | 114.6794 | 3.68802        | 1.231562 | 2.994587 | 0.002748              | 0.012737              | 9.260678 | 0.827011 | 39.45002 | 260.1914 | 330.0373 | 48.30989 |
| Dib       | 458.558  | 3.152753       | 1.053624 | 2.992294 | 0.002769              | 0.012737              | 15.74315 | 99.24129 | 163.0601 | 1337.475 | 142.7916 | 993.0366 |
| MevK      | 1924.799 | -2.17903       | 0.83428  | -2.61186 | 0.009005              | 0.034519              | 3388.482 | 5342.489 | 728.5104 | 701.4518 | 1013.012 | 374.849  |
| SAD       | 181.1887 | -1.24983       | 0.590351 | -2.11709 | 0.034252              | 0.112542              | 151.8751 | 366.3657 | 247.2201 | 123.2486 | 68.70164 | 129.721  |
| MevPK     | 188.5536 | -1.28228       | 0.678881 | -1.88882 | 0.058916              | 0.169385              | 282.4507 | 116.6085 | 402.3902 | 98.90318 | 157.6096 | 73.35946 |
| phm       | 102.6528 | -1.03913       | 0.649937 | -1.59881 | 0.109862              | 0.280758              | 94.45892 | 189.3855 | 130.6234 | 83.68731 | 30.98309 | 86.77888 |
| JHAMT     | 4.358029 | -3.30588       | 2.154608 | -1.53433 | 0.124949              | 0.287382              | 17.59529 | 0        | 6.13667  | 1.521587 | 0        | 0.894628 |
| HMGR      | 828.3447 | -0.89039       | 0.605893 | -1.46955 | 0.141684              | 0.296248              | 1132.581 | 1587.861 | 507.5902 | 674.0632 | 646.6036 | 421.3696 |
| FDH       | 2683.016 | 0.664594       | 0.538831 | 1.2334   | 0.217427              | 0.416734              | 1988.268 | 1238.862 | 2999.955 | 3213.593 | 4108.627 | 2548.794 |
| IPPI      | 1015.949 | 0.340298       | 0.35267  | 0.964917 | 0.334586              | 0.533151              | 917.7332 | 905.5767 | 867.0238 | 1150.32  | 971.2525 | 1283.791 |
| FPPS      | 3947.969 | 0.447559       | 0.47661  | 0.939046 | 0.347707              | 0.533151              | 3248.646 | 3097.155 | 3674.988 | 6156.343 | 4638.034 | 2872.649 |
| SHD       | 97.308   | 0.560599       | 0.580805 | 0.965209 | 0.33444               | 0.533151              | 87.97644 | 95.10623 | 52.60003 | 101.9464 | 168.3864 | 77.8326  |
| AACT      | 2336.706 | -0.21883       | 0.438328 | -0.49924 | 0.617613              | 0.692154              | 2580.025 | 2889.575 | 2070.688 | 2128.701 | 2750.76  | 1600.489 |
| MevPPD    | 14316.34 | 0.342529       | 0.489529 | 0.699711 | 0.484108              | 0.692154              | 10611.81 | 13348.78 | 13913.58 | 21452.86 | 9856.664 | 16714.33 |
| FPPP      | 135.4362 | 0.419572       | 0.736565 | 0.569634 | 0.568926              | 0.692154              | 165.7661 | 35.56146 | 146.4034 | 115.6406 | 206.1049 | 143.1404 |
| Epoxidase | 19.14208 | -0.48478       | 1.012148 | -0.47896 | 0.631967              | 0.692154              | 20.37349 | 6.616086 | 40.32669 | 12.1727  | 6.735455 | 28.62808 |
| JHE       | 483.2224 | 0.510775       | 0.982535 | 0.519854 | 0.603165              | 0.692154              | 111.1281 | 760.0228 | 324.3668 | 1052.938 | 126.6265 | 524.2518 |
| spook     | 304.4963 | -1.0462        | 1.89308  | -0.55264 | 0.580508              | 0.692154              | 12.03888 | 1177.663 | 41.20335 | 339.314  | 0        | 256.7581 |
| JHEH      | 333.8166 | -0.21356       | 0.662186 | -0.32251 | 0.747065              | 0.781022              | 337.0887 | 205.9257 | 532.1369 | 272.3641 | 486.2998 | 169.0846 |
| Nvd       | 47.44215 | -0.22423       | 1.556433 | -0.14407 | 0.885447              | 0.885447              | 0.926068 | 149.6889 | 2.630001 | 50.21238 | 60.61909 | 20.57643 |
